# Supplementary material for: Could patents interfere with the development of a cardiovascular polypill?
Source: J Transl Med. 2016 Aug 18;14:242. doi: 10.1186/s12967-016-0997-3 (PMC4991009; doi:10.1186/s12967-016-0997-3)
Supplement: Supplementary file 2 — 10.1186/s12967-016-0997-3 Cardiovascular drug patent database. [file 12967_2016_997_MOESM2_ESM.xlsx]

## Sheet: Table of contents
Alphabetical				Table of contents
	acebutolol
	acetylsalicylic acid (aspirin)			By drug class
	amiloride			Angiotensin system	Anti-calcium, CCB	Diuretics
	amlodipine			ACE	amlodipine	amiloride
	atenolol			benazepril	felodipine	bumetanide
	atorvastatin			enalapril	nifedipine	chlorothiazide
	benazepril			fosinopril	nimodipine	chlorthalidone
	bisoprolol			lisinopril		eplerenone
	bumetanide			perindopril	Antiplatelets	furosemide
	candesartan			quinapril	acetylsalicylic acid (aspirin)	hydrochlorothiazide
	carvedilol			ramipril	clopidogrel	indapamide
	chlorothiazide			trandolapril		metolazone
	chlorthalidone				Beta-blockers	spironolactone
	clopidogrel			ARB	acebutolol	torasemide
	enalapril			candesartan	atenolol	triamterene
	eplerenone			eprosartan	bisoprolol
	eprosartan			irbesartan	carvedilol	Statins
	felodipine			losartan	metoprolol	atorvastatin
	fluvastatin			olmesartan	nadolol	fluvastatin
	fosinopril			telmisartan	nebivolol	lovastatin
	furosemide			valsartan	propranolol	pitavastatin
	hydrochlorothiazide					pravastatin
	indapamide					rosuvastatin
	irbesartan					simvastatin
	lisinopril
	losartan
	lovastatin
	metolazone
	metoprolol
	nadolol
	nebivolol
	nifedipine
	nimodipine
	olmesartan
	perindopril
	pitavastatin
	pravastatin
	propranolol
	quinapril
	ramipril
	rosuvastatin
	simvastatin
	spironolactone
	telmisartan
	torasemide
	trandolapril
	triamterene
	valsartan

## Sheet: Table 1
	United States					Canada					Other countries
	Patents1					Patents1					Patents2
Drug	Co-formulation	Compound	Formulation	Method	Process	Co-formulation	Compound	Formulation	Method	Process	Co-formulation	Compound	Formulation	Method	Process
acebutolol
acetylsalicylic acid (aspirin)			X	X				X	X				16	16
amiloride
amlodipine	X		X	X	X	X					63	1	4	7	4
atenolol
atorvastatin	X		X	X	X	X		X	X	X	50	4	53	39	39
benazepril	X
bisoprolol
bumetanide
candesartan	X	X		X				X	X	X	1		4	10	9
carvedilol			X	X	X			X	X	X			22	29	13
chlorothiazide
chlorthalidone	X					X					31
clopidogrel			X		X			X		X		11	44		44
enalapril												3
eplerenone	X		X	X		X		X	X		25	3	25	25
eprosartan	X		X	X	X	X		X	X	X	7	6	37	42	37
felodipine
fluvastatin			X					X					36
fosinopril												2
furosemide
hydrochlorothiazide	X					X					60
indapamide	X					X					37
irbesartan	X		X			X		X			23	8	23
lisinopril												3
losartan			X		X							2
lovastatin	X		X					X			13	1	12	12
metolazone
metoprolol
nadolol
nebivolol			X					X				1	31	4
nifedipine
nimodipine
olmesartan	X	X	X	X	X	X		X			29	8	24	8	8
perindopril			X	X	X	X		X	X	X	18		37	18
pitavastatin	X		X	X	X			X	X	X	13	2	17	17	10
pravastatin				X					X			1		8
propranolol			X	X				X	X				10	10
quinapril			X	X			X					1	3	3
ramipril	X			X		X			X		34		34	35
rosuvastatin		X	X	X				X	X		6	50	33
simvastatin	X					X					19
spironolactone
telmisartan	X	X	X	X	X	X		X	X	X	49	6	35	17	36
torasemide
trandolapril	X			X			X			X	3			2
triamterene
valsartan	X	X	X	X		X		X	X		42	7	36	36
Total	18	5	20	18	10	14	2	18	14	9	523	120	536	338	200
Grand totals	555	127	574	370	219
1 A black "X" means that at least one patent was found fitting into this category on the national patent register. The red "X" denotes at least one patent was found that was not listed in the national registers, but current legal status was unknown.
2 The numbers below indicate the number of jurisdictions covered by the patents. Current legal status of these patents was not determined.

## Sheet: Table 1 w generics
	United States							Canada							Other countries
	Patents*					Generics**		Patents*					Generics**		Patents**
	Co-formulation	Compound	Formulation	Method	Process	Co-formulations	Single formulation	Co-formulation	Compound	Formulation	Method	Process	Co-formulations	Single formulation	Co-formulation	Compound	Formulation	Method	Process
acebutolol							G							G
acetylsalicylic acid (aspirin)			X	X			G			X	X			G			16	16
amiloride							G							G
amlodipine	X		X	X	X	g	G	X					g	G	63	1	4	7	4
atenolol							G							G
atorvastatin	X		X	X	X	g	G	X		X	X	X	G	G	50	4	53	39	39
benazepril	X					G	G							G
bisoprolol							G							G
bumetanide							G							G
candesartan	X	X		X		G	G			X	X	X		G	1		4	10	9
carvedilol			X	X	X		g			X	X	X		G			22	29	13
chlorothiazide							g
chlorthalidone	X					N	G	X						G	31
clopidogrel			X		X		g			X		X		g		11	44		44
enalapril							G							G		3
eplerenone	X		X	X			G	X		X	X			N	25	3	25	25
eprosartan	X		X	X	X	N	G	X		X	X	X	N	N	7	6	37	42	37
felodipine							G							G
fluvastatin			X				g			X				g			36
fosinopril							G							G		2
furosemide							G							G
hydrochlorothiazide	X					g	G	X					g	G	60
indapamide	X						G	X					N	G	37
irbesartan	X		X			G	G	X		X			G	G	23	8	23
lisinopril							G							G		3
losartan			X		X		G							G		2
lovastatin	X		X			N	g			X				G	13	1	12	12
metolazone							G							N
metoprolol							G							G
nadolol							G							G
nebivolol			X				N			X				G		1	31	4
nifedipine							G							G
nimodipine							g							N
olmesartan	X	X	X	X	X	N	N	X		X			N	N	29	8	24	8	8
perindopril			X	X	X		G	X		X	X	X	N	N	18		37	18
pitavastatin	X		X	X	X		N			X	X	X			13	2	17	17	10
pravastatin				X			G				X			G		1		8
propranolol			X	X			G			X	X			G			10	10
quinapril			X	X			G		X				N	G		1	3	3
ramipril	X			X			G	X			X		G	G	34		34	35
rosuvastatin		X	X	X			N			X	X			G	6	50	33
simvastatin	X					N	G	X						G	19
spironolactone							G							G
telmisartan	X	X	X	X	X	G	G	X		X	X	X	g	G	49	6	35	17	36
torasemide
trandolapril	X			X		G	G		X			X	N	N	3			2
triamterene							N						G
valsartan	X	X	X	X		g	G	X		X	X		G	G	42	7	36	36
Total	18	5	20	18	10	14	47	14	2	18	14	9			523	120	536	338	200
* A black "X" means that at least one patent was found fitting into this category on the national patent register. The red "X" denotes at least one patent was found that was not listed in the national registers, but current legal status was unknown.
** The numbers below indicate the number of jurisdictions covered by the patents. Current legal status of these patents was not determined.

## Sheet: Table 2
INN	Patent numbers provided	Latest Merck patent grant year provided	International INPADOC family application date range
olmesartan	EP503785, US5616599	1997	1992 - 2011
valsartan	EP443983, US5399578	1995	1991 - 2010
candesartan	EP459136, US5196444	1993	1991 - 2006
eprosartan	EP403159, US5185351	1993	1990 - 2001
irbesartan	WO9114679, US5270317	1993	1990 - 1999
atorvastatin	EP409281, US5273995	1993	1990 - 2007
rosuvastatin	EP521471, US5260440	1993	1992 - 2003
losartan	EP253310, US5138069	1992	1987 - 1999
telmisartan	EP502314	1992	1991 - 2011
fosinopril	EP304063, US5011930	1991	1988 - 1995
pitavastatin	EP304063, US5011930	1991	1988 - 1995
trandolapril	EP84164, US4933361	1990	1981 - 1994
clopidogrel	EP99802, US4529596, EP281459, US4847265	1989	1982 - 1998
fluvastatin	WO8402131, US4739073	1988	1983 - 1995
nebivolol	EP145067, US4654362	1987	1984 - 2004
ramipril	EP79022, US4587258	1986	1982 - 1994
amlodipine	EP89167, US4572909	1986	1983 - 1998
perindopril	EP49658, US4508729	1985	1979 - 1993
carvedilol	DE2815926, US4503067	1985	1978 - 1994
eplerenone	EP122232, US4559332	1985	1984 - 2004
simvastatin	EP33538, US4444784	1984	1980 - 1994
benazepril	EP72352, US4410520	1983	1982 - 1993
enalapril	EP12401, US4374829	1983	1979 - 1998
lisinopril	EP12401, US4374829	1983	1979 - 1998
quinapril	EP49605, US4344949	1982	1981 - 1996
pravastatin	DE3122499, US4346227	1982	1980 - 1996
felodipine	EP7293, US4264611	1981	1978 - 1994
bisoprolol	BE859425, US4258062	1981	1976 - 1993
lovastatin	US4231938	1980	1978 - 1998
torasemide	DE2516025, US4018929	1977	1974 - 1994
metoprolol	DE2106209, US3998790	1976	1932 - 1977
nadolol	DE2258995, US3935267, DE2421549	1976	1971 - 1979
nimodipine	DE2117571, US3799934	1974	1971 - 1977
acebutolol	ZA6808345, US3857952	1974	1967 - 1974
atenolol	DE2007751, US3663607, US3836671	1974	1969 - 1975
bumetanide	DE1964503, DE1964504, US3806534	1974	1968 - 1974
indapamide	FR2003311, US3565911	1971	1968 - 1969
propranolol	BE640312, BE640313, US3337628, US3520919	1970	1962 - 1967
nifedipine	ZA6801482, US3485847	1969	1967 - 1969
amiloride	BE639386, US3313813	1967	1962 - 1981
metolazone	US3360518	1967	1966 - 1967
acetylsalicylic acid (aspirin)	DE236196, US2890240, US3235583	1966	1959 - 1964
hydrochlorothiazide	US3025292, US3163645, DE1163332, US3164588, US3043840	1964	1962 - 1965
triamterene	US3081230	1963	1960 - 1964
chlorthalidone	US3055904	1962	1957 - 1962
furosemide	DE1122541, US305888	1962	1959 - 1964
spironolactone	US3013012	1961	1960 - 1961
chlorothiazide	US2809194	1957	1957

## Sheet: acebutolol
BACK TO CONTENTS
INN:	acebutolol
Category:	beta-blockers
1. Merck Index
Merck status:	Expired
Merck year:
Merck data:	Prepn: K. R. H. Wooldridge, B. Basil, ZA 6808345; eidem, US 3857952 (1969, 1974 both to May & Baker)
Merck patents:	ZA6808345, US3857952
2. Orange Book
Single formulations:	Drug	Dosage form/route	Strength(s)	Proprietary name	Brand supplier	# of generic suppliers	Patents	Data exclusivity	Drug approval date	Co-formulations available	Patented co-formulation	Notes
	acebutolol (HYDROCHLORIDE)	APSULE; ORAL	EQ 200MG BASE, EQ 400MG BASE	SECTRAL	PROMIUS PHARMA	2	None	None	1984-12-28	None	No	Only available as ACEBUTOLOL HYDROCHLORIDE	Prepn: K. R. H. Wooldridge, B. Basil, ZA 6808345; eidem, US 3857952 (1969, 1974 both to May & Baker)
Single formulation patents:	None
Co formulations:	Drug	Dosage form/route	Strength(s)	Proprietary name	Brand supplier	# of generic suppliers	Patents	Data exclusivity	Drug approval date	Co-formulations available	Patented co-formulation	Notes
	None
OB co-forms w patents:	None
3. HC patent register
Single formulations:	INN	On patent register	Dosage form/route	Strength(s)	Proprietary name	Brand supplier	# of generic suppliers	patents
	acebutolol	No	tablet	100, 200, 400MG	SECTRAL	SANOFI-AVENTIS CANADA INC	6
Single formulation patents:	None
Co formulations:	INN	On patent register	Dosage form/route	Strength(s)	Proprietary name	Brand supplier	# of generic suppliers	patents
	None
Co formulation patents:	None
4. Drug bank patents:	None
5. WO patents:	Patent number	Title	Date	Applicant	Inventor	Abstract	Inclusion/exclusion	Note	Typology	Typology description	APIs listed	Other APIs listed	API categories listed
	WO2012011118	DEVELOPMENT OF A FIXED DOSE COMBINATION DOSAGE FORM CONTAININGRAMIPRIL AND CARVEDILOL	26.01.2012	SAGI REDDY BABU REDDY, Purshotama	SAGI REDDY BABU REDDY, Purshotama	A pharmaceutical preparation for oral administration comprising a combination of an ACE inhibitor such as Ramipril, benzapril or a pharmaceutically acceptable salt thereof, and a non selective Beta-blocker such as Carvedilol, propranolol etc, or a pharmaceutically acceptable salt thereof, wherein the ACE inhibitor compound is in immediate release form, the beta-blocker compound is in immediate re…	1		Co-formulation	1 category with other category(ies)	ramipril, benzapril		ACE inhibitor, beta-blocker compound
	WO2009092819	COMBINATION OF ORAL MEDICAMENTS BONDED BY A WRAPPING	30.07.2009	DUO-GE	LUGRIN, Anne-Emmanuelle	Oral pharmaceutical dosage form containing at least two medicaments, in which form the medicaments on the one hand are brought together in a leakproof and in-vivo water soluble wrapping and on the other hand are separated so that the active principle of the combined medicaments cannot come into contact with one another, at least one of the medicaments being selected from the following therapeutic…	1		Polypill prototype	2 or more with 2 or more other categories	acetylsalicylic acid, propranolol, clopidogrel	spironolactone, clarithromycin, amoxycillin, potassium	non-steroidal anti-inflammatory drug (NSAID), proton pump inhibitor (PPI), beta-blocker, statin, conversion enzyme inhibitor (CEI), biguanide, myorelaxant, calcium inhibitor, corticoid, antidepressant, benzodiazepine, non-atropine-like intestinal transit retarder, intestinal antibacterial
6. All patents	ZA6808345, US3857952, WO2012011118, WO2009092819
7. Starting patents with families
	Thomson Innovation Patent Export, 2015-05-05 13:02:12 -0500
	Publication Number	Title	Abstract	Application Date	Application Number	Priority Number	Priority Date	Publication Date	Assignee/Applicant	INPADOC Family Members	DWPI Family Members	Title - DWPI	INPADOC Family ID	INPADOC Legal Status	Reassignment (US)	Maintenance Status (US)	Opposition (EP)	License (EP)	DWPI Count of Family Members	DWPI Count of Family Countries	Related Applications
	US3857952A	CERTAIN BENZENE DERIVATIVES USEFUL IN TREATING CARDIAC DISORDERS	Benzene derivatives of the formula: ##SPC1##<P><P> Wherein R.sup.1 represents alkanoyl amino of not more than nine carbon atoms, R. sup.2 represents alkyl of one through six carbon atoms, and R. sup.3 represents alkyl of one through six carbon atoms or cycloalkyl of three through six carbon atoms, possess pharmacodynamic properties and are useful in the treatment of various cardiac disorders. Ben…	1972-08-03	US1972277607A	GB196758516A | GB196856513A | GB196837103A	1967-12-22 | 1968-05-14 | 1968-08-02	1974-12-31	May & Baker Limited,Dagenham, Essex	US3857952A | AT286262B | AT286963B | AT289826B | AT292671B | BE715205A | BE725845A | BR196804995D0 | CH484057A | CH485663A | CH489467A | CY723A | DE1768468A1 | DE1815808A1 | DE1815808B2 | DE1815808C3 | DK127060B | DK129034B | ES353917A1 | ES361741A1 | FI49290B | FI49290C | FR1570087A | FR7616M | FR8183M | GB1231783A | GB1247384A | IE32174B1 | IE32174L | IE32898B1 | IE32898L | IL30001A | IL30001D0…	NL196818289A | DE1815808A1 | CH484057A | FR8183M | CA879731A | GB1247384A | JP71031848B | US3726919A | US3857952A | US3875149A | SU443509A | SU449484A | DE1815808B | NL169172B | SU931103A | DE1768468A1	(3-amino-2-hydroxypropoxy) benzene cpds. cardioactive	19680725IL30001D0	2003-07-08 356 PATENT TERM EXTENSION UNDER 35 U.S.C. 156 + PRODUCT NAME: SECTRAL TABLETS 1991-12-17 1993-12-17 | 1986-05-27 356 PATENT TERM EXTENSION UNDER 35 U.S.C. 156 + 2 YEARS		XT			16	9	US1968785403A,1968-12-19
	ZA196808345A	Benzene derivatives		0001-01-01	ZA00006808345A	ZA00006808345A | GB196758516A | GB196856513A | GB196837103A	0001-01-01 | 1967-12-22 | 1968-05-14 | 1968-08-02		MAY & BAKER LTD	ZA196808345A | AT286262B | AT286963B | AT289826B | AT292671B | BE715205A | BE725845A | BR196804995D0 | CH484057A | CH485663A | CH489467A | CY723A | DE1768468A1 | DE1815808A1 | DE1815808B2 | DE1815808C3 | DK127060B | DK129034B | ES353917A1 | ES361741A1 | FI49290B | FI49290C | FR1570087A | FR7616M | FR8183M | GB1231783A | GB1247384A | IE32174B1 | IE32174L | IE32898B1 | IE32898L | IL30001A | IL30001…			19680725IL30001D0
	WO2009092819A1	COMBINATION OF ORAL MEDICAMENTS BONDED BY A WRAPPING | COMBINAISON DE MÉDICAMENTS ORAUX RÉUNIS PAR UNE ENVELOPPE	Oral pharmaceutical dosage form containing at least two medicaments, in which form the medicaments on the one hand are brought together in a leakproof and in-vivo water soluble wrapping and on the other hand are separated so that the active principle of the combined medicaments cannot come into contact with one another, at least one of the medicaments being selected from the following therapeutic…	2009-01-26	WO2009EP50858A	FR200850461A | FR200850460A | US20086652P | US20086651P	2008-01-25 | 2008-01-25 | 2008-01-25 | 2008-01-25	2009-07-30	DUO-GE,FR | LUGRIN Anne-Emmanuelle,FR | GRISCELLI Claude,FR | EL GLAOUI Mehdi,CH | EL GLAOUI Guillaume,FR | HOFFELT Jean,FR	WO2009092819A1 | AU2009207580A1 | AU2009207580A8 | AU2009207580B2 | AU2009207580B8 | CA2713197A1 | CN101969933A | EP2249815A1 | FR2926723A1 | FR2926723B1 | FR2926724A1 | FR2926724B1 | JP2011510049A | JP2015042672A | MX2010008071A | RU2010135514A | RU2493832C2 | US20110027356A1	WO2009092819A1 | FR2926723A1 | FR2926724A1 | FR2926723B1 | FR2926724B1 | AU2009207580A1 | EP2249815A1 | CA2713197A1 | US20110027356A1 | MX2010008071A | CN101969933A | JP2011510049A | IN201001618P3 | RU2010135514A | RU2493832C2 | AU2009207580B2 | AU2009207580A8 | AU2009207580B8 | JP2015042672A	Oral pharmaceutical dosage form e.g. for treatment of hypercholesterolemia, comprises medicaments brought together in water-soluble wrapping and separated so that active principles in combined medicaments do not contact with one another	20090730AU2009207580A1	2010-10-12 WWE WIPO INFORMATION: ENTRY INTO NATIONAL PHASE + US 12864397 | 2010-08-25 WWE WIPO INFORMATION: ENTRY INTO NATIONAL PHASE + RU 2010135514 | 2010-08-25 ENP ENTRY INTO THE NATIONAL PHASE IN: RU 2010135514 A | 2010-08-19 ENP ENTRY INTO THE NATIONAL PHASE IN: AU 2009207580 A 2009-01-26 | 2010-07-27 NENP NON-ENTRY INTO THE NATIONAL PHASE IN: DE | 2010-07-26 WWE WIPO INFORMATION: ENTRY INTO…					19	123
	WO2012011118A2	DEVELOPMENT OF A FIXED DOSE COMBINATION DOSAGE FORM CONTAINING RAMIPRIL AND CARVEDILOL | MISE AU POINT D'UNE FORME GALÉNIQUE COMBINÉE À DOSE FIXE CONTENANT RAMIPRIL ET CARVÉDILOL	A pharmaceutical preparation for oral administration comprising a combination of an ACE inhibitor such as Ramipril, benzapril or a pharmaceutically acceptable salt thereof, and a non selective Beta-blocker such as Carvedilol, propranolol etc, or a pharmaceutically acceptable salt thereof, wherein the ACE inhibitor compound is in immediate release form, the beta-blocker compound is in immediate re…	2011-05-13	WO2011IN335A	US2010395577P	2010-05-13	2012-01-26	SAGI REDDY BABU REDDY Purshotama,US | EMANI R. Venkata,US | MAHALINGAM Ravichandran,US | JAYAPAL Ravi,US | JASTI RAO Bhaskara,US	WO2012011118A2	WO2012011118A2	Composition, used to prevent or treat hypertension or congestive heart failure in humans, comprises combination of angiotensin-converting enzyme inhibitor (ramipril or benazepril), and non-selective beta-blocker (carvedilol or propranolol)	20120126WO2012011118A2	2013-06-05 122 EP: PCT APP. NOT ENT. EUROP. PHASE - EP 11809377 A2 | 2012-03-14 121 EP: THE EPO HAS BEEN INFORMED BY WIPO THAT EP WAS DESIGNATED IN THIS APPLICATION EP 11809377 A2					1	114
8. N. American extended	Expired
	Thomson Innovation Patent Export, 2015-05-06 10:24:24 -0400
	Publication Number	Title	Abstract	Application Date	Application Number	Priority Number	Priority Date	Publication Date	Assignee/Applicant	INPADOC Family Members	DWPI Family Members	Title - DWPI	INPADOC Family ID	INPADOC Legal Status	Reassignment (US)	Maintenance Status (US)	Opposition (EP)	License (EP)	DWPI Count of Family Members	DWPI Count of Family Countries	Related Applications
	CA879731A	DERIVES DU BENZENE		0001-01-01	CA879731A	CAT879731A	0001-01-01	1971-08-31	MAY AND BAKER LIMITED	CA879731A	NL196818289A | DE1815808A1 | CH484057A | FR8183M | CA879731A | GB1247384A | JP71031848B | US3726919A | US3857952A | US3875149A | SU443509A | SU449484A | DE1815808B | NL169172B | SU931103A | DE1768468A1	(3-amino-2-hydroxypropoxy) benzene cpds. cardioactive	19710831CA879731A_						16	9
	US3726919A	BENZENE DERIVATIVES	Benzene derivatives of the formula: ##SPC1##<P><P> Wherein R.sup.1 represents alkanoylamino of not more than nine carbon atoms, R. sup.2 represents alkyl of one through six carbon atoms, and R. sup.3 represents alkyl of one through six carbon atoms or cycloalkyl of three through six carbon atoms, possess pharmacodynamic properties and are useful in the treatment of various cardiac disorders. More…	1968-12-19	US1968785403A	GB196758516A | GB196856513A | GB196837103A	1967-12-22 | 1968-05-14 | 1968-08-02	1973-04-10	May & Baker Limited,Dagenham, Essex	US3726919A | AT286262B | AT286963B | AT289826B | AT292671B | BE715205A | BE725845A | BR196804995D0 | CH484057A | CH485663A | CH489467A | CY723A | DE1768468A1 | DE1815808A1 | DE1815808B2 | DE1815808C3 | DK127060B | DK129034B | ES353917A1 | ES361741A1 | FI49290B | FI49290C | FR1570087A | FR7616M | FR8183M | GB1231783A | GB1247384A | IE32174B1 | IE32174L | IE32898B1 | IE32898L | IL30001A | IL30001D0…	NL196818289A | DE1815808A1 | CH484057A | FR8183M | CA879731A | GB1247384A | JP71031848B | US3726919A | US3857952A | US3875149A | SU443509A | SU449484A | DE1815808B | NL169172B | SU931103A | DE1768468A1	(3-amino-2-hydroxypropoxy) benzene cpds. cardioactive	19680725IL30001D0						16	9
	US3857952A	CERTAIN BENZENE DERIVATIVES USEFUL IN TREATING CARDIAC DISORDERS	Benzene derivatives of the formula: ##SPC1##<P><P> Wherein R.sup.1 represents alkanoyl amino of not more than nine carbon atoms, R. sup.2 represents alkyl of one through six carbon atoms, and R. sup.3 represents alkyl of one through six carbon atoms or cycloalkyl of three through six carbon atoms, possess pharmacodynamic properties and are useful in the treatment of various cardiac disorders. Ben…	1972-08-03	US1972277607A	GB196758516A | GB196856513A | GB196837103A	1967-12-22 | 1968-05-14 | 1968-08-02	1974-12-31	May & Baker Limited,Dagenham, Essex	US3857952A | AT286262B | AT286963B | AT289826B | AT292671B | BE715205A | BE725845A | BR196804995D0 | CH484057A | CH485663A | CH489467A | CY723A | DE1768468A1 | DE1815808A1 | DE1815808B2 | DE1815808C3 | DK127060B | DK129034B | ES353917A1 | ES361741A1 | FI49290B | FI49290C | FR1570087A | FR7616M | FR8183M | GB1231783A | GB1247384A | IE32174B1 | IE32174L | IE32898B1 | IE32898L | IL30001A | IL30001D0…	NL196818289A | DE1815808A1 | CH484057A | FR8183M | CA879731A | GB1247384A | JP71031848B | US3726919A | US3857952A | US3875149A | SU443509A | SU449484A | DE1815808B | NL169172B | SU931103A | DE1768468A1	(3-amino-2-hydroxypropoxy) benzene cpds. cardioactive	19680725IL30001D0	2003-07-08 356 PATENT TERM EXTENSION UNDER 35 U.S.C. 156 + PRODUCT NAME: SECTRAL TABLETS 1991-12-17 1993-12-17 | 1986-05-27 356 PATENT TERM EXTENSION UNDER 35 U.S.C. 156 + 2 YEARS		XT			16	9	US1968785403A,1968-12-19
	US3875149A	Oximes of 1-(ortho-acyl-phenoxy)-2-hydroxy-3-aminopropanes	Oximes of the formula:<P><P>WHEREIN R is hydrogen or phenyl, R.sub. 1 is hydrogen, alkyl of up to 6 carbon atoms, or hydroxyalkyl of up to 6 carbon atoms, R.sub.2 is alkyl of up to 6 carbon atoms, or hydroxyalkyl of up to 6 carbon atoms, or R.sub.1 and R.sub.2 together with the nitrogen to which they are attached represent morpholino, R.sub.3 is hydrogen, or alkyl of up to 6 carbon atoms, and R. …	1972-12-19	US1972316508A	GB196722735A | GB196758516A	1967-05-16 | 1967-12-22	1975-04-01	May & Baker Limited	US3875149A | AT286262B | AT286963B | AT289826B | AT292671B | BE715205A | BE725845A | BR196804995D0 | CH484057A | CH485663A | CH489467A | CY723A | DE1768468A1 | DE1815808A1 | DE1815808B2 | DE1815808C3 | DK127060B | DK129034B | ES353917A1 | ES361741A1 | FI49290B | FI49290C | FR1570087A | FR7616M | FR8183M | GB1231783A | GB1247384A | IE32174B1 | IE32174L | IE32898B1 | IE32898L | IL30001A | IL30001D0…	NL196818289A | DE1815808A1 | CH484057A | FR8183M | CA879731A | GB1247384A | JP71031848B | US3726919A | US3857952A | US3875149A | SU443509A | SU449484A | DE1815808B | NL169172B | SU931103A | DE1768468A1	(3-amino-2-hydroxypropoxy) benzene cpds. cardioactive	19680725IL30001D0						16	9	US1971204682A,1971-12-03 | US1971130793A,1971-04-02 | US1968729394A,1968-05-15

## Sheet: acetylsalicylic acid_aspirin
BACK TO CONTENTS
INN:	acetylsalicylic acid, aspirin
Category:	antiplatelets
1. Merck Index
Merck status:	Expired
Merck year:	1966
Merck data:	Analgesic prepd by treating salicylsalicylic acid q.v., with acetic anhydride or by fractionating an acetylsalicylic acid melt: DE 236196 (1908 to Boehringer). / Crystallization from acetone: Hamer, Phillips, US 2890240 (1959 to Monsanto). Synthesis involving distillation: Edmunds, US 3235583 (1966 to Norwich Pharm.)
Merck patents:	DE236196, US2890240, US3235583
2. Orange Book
Single formulations:	Drug	Dosage form/route	Strength(s)	Proprietary name	Brand supplier	# of generic suppliers	Patents	Data exclusivity	Drug approval date	Co-formulations available	Patented co-formulation	Notes
	acetylsalicylic acid	Not in OB - see note - old compound	n/a	n/a	n/a	n/a	n/a	n/a	n/a	n/a	No	Merck Index says "Analgesic prepd by treating salicylsalicylic acid q.v., with acetic anhydride or by fractionating an acetylsalicylic acid melt: DE 236196 (1908 to Boehringer)."	Analgesic prepd by treating salicylsalicylic acid q.v., with acetic anhydride or by fractionating an acetylsalicylic acid melt: DE 236196(1908 to Boehringer).	1908
	aspirin	CAPSULE; ORAL	325MG	ASPIRIN	PLX PHARMA	1	US8865187	None	2013-01-14	ACETAMINOPHEN; ASPIRIN; CAFFEINE, ACETAMINOPHEN+ASPIRIN+CAFFEINE, ASPIRIN; BUTALBITAL; CAFFEINE ASPIRIN; BUTALBITAL; CAFFEINE; CODEINE PHOSPHATE ASPIRIN; CAFFEINE; DIHYDROCODEINE BITARTRATE ASPIRIN; CAFFEINE; ORPHENADRINE CITRATE ASPIRIN; CAFFEINE; ORPHENADRINE CITRATE ASPIRIN; CARISOPRODOL ASPIRIN; CARISOPRODOL; CODEINE PHOSPHATE ASPIRIN; DIPYRIDAMOLE ASPIRIN; METHOCARBAMOL ASPIRIN; OXYCODONE HY…	YES	OCT product	Crystallization from acetone: Hamer, Phillips, US 2890240 (1959 to Monsanto). Synthesis involving distillation: Edmunds, US 3235583 (1966 to Norwich Pharm.).	1966
Single formulation patents:	US8865187
Co formulations:	Drug	Dosage form/route	Strength(s)	Proprietary name	Brand supplier	# of generic suppliers	Patents	Data exclusivity	Drug approval date	Co-formulations available	Patented co-formulation	Notes
	ACETAMINOPHEN+ASPIRIN+CAFFEINE	TABLET; ORAL	250MG; 250MG; 65MG	EXCEDRIN (MIGRAINE)	NOVARTIS	NONE	US5972916	None	1998-01-14
	ASPIRIN+BUTALBITAL+CAFFEINE	CAPSULE; ORAL	325MG; 50MG; 40MG	FIORINAL	ACTAVIS LABS UT INC	1	None	None	1986-04-16
	ASPIRIN+BUTALBITAL+CAFFEINE+CODEINE PHOSPHATE	CAPSULE; ORAL	325MG; 50MG; 40MG; 30MG	FIORINAL W/CODEINE	ACTAVIS LABS UT INC	2	None	None	1990-10-26
	ASPIRIN+CAFFEINE+DIHYDROCODEINE BITARTRATE	CAPSULE; ORAL	356.4MG; 30MG; 16MG	SYNALGOS-DC	CARACO	NONE	None	None	1983-09-06
	ASPIRIN+CAFFEINE+ORPHENADRINE CITRATE	TABLET; ORAL	385MG; 30MG; 25MG	NORGESIC	MEDICIS	1	None	None	1982-10-27
	ASPIRIN+CAFFEINE+ORPHENADRINE CITRATE	TABLET; ORAL	770MG; 60MG; 50MG	NORGESIC FORTE	MEDICIS	1	None	None	1982-10-27
	ASPIRIN+CARISOPRODOL	TABLET; ORAL	325MG; 200MG	SOMA COMPOUND	MEDA PHARMS	4	None	None	1983-07-11
	ASPIRIN+CARISOPRODOL+CODEINE PHOSPHATE	TABLET; ORAL	325MG; 200MG; 16MG	SOMA COMPOUND W/ CODEINE	MEDA PHARMS	1	None	None	1983-07-11
	ASPIRIN+DIPYRIDAMOLE	CAPSULE, EXTENDED RELEASE; ORAL	25MG; 200MG	AGGRENOX	BOEHRINGER INGELHEIM	1	US6015577	None	1999-11-22
	ASPIRIN+METHOCARBAMOL	TABLET; ORAL	325MG; 400MG	METHOCARBAMOL AND ASPIRIN	STEVENS J	NONE	None	None	1995-01-31
	ASPIRIN+OXYCODONE HYDROCHLORIDE	TABLET; ORAL	325MG; 4.8355MG	PERCODAN	ENDO PHARMS	2	None	None	2005-08-05
OB co-forms w patents:	US5972916, US6015577
3. HC patent register
Single formulations:	INN	On patent register	Dosage form/route	Strength(s)	Proprietary name	Brand supplier	# of generic suppliers	patents
	acetylsalicylic acid	No					11
	aspirin	Not in HC					???
Single formulation patents:	None
Co formulations:	INN	On patent register	Dosage form/route	Strength(s)	Proprietary name	Brand supplier	# of generic suppliers	patents
	None
Co formulation patents:	None
4. Drug bank patents:	None
5. WO patents:	Patent number	Title	Date	Applicant	Inventor	Abstract	Inclusion/exclusion	Note	Typology	Typology description	APIs listed	Other APIs listed	API categories listed
	WO2009022821	COMBINATION PREPARATION COMPRISING INHIBITOR OF HMG-COA REDUCTASE AND ASPIRIN AND METHOD FOR MANUFACTURING THE SAME	19.02.2009	HANALL PHARMACEUTICAL COMPANY. LTD	KIM, Sung Wuk	The present invention relates to a chronotherapeutically combined pharmaceutical formulation for preventing and treating cardiovascular diseases, which is based on the principle of administering a plurality of drugs at certain time intervals (chronotherapy). Specifically, the combinedpharmaceutical formulation comprises a HMG-CoA reductase inhibitor, such as simvastatin, and aspirin. Because the …	1		Co-formulation	1 specific drug with other category(ies)	aspirin, simvastatin		HMG-CoA reductase inhibitor
	WO2009092819	COMBINATION OF ORAL MEDICAMENTS BONDED BY A WRAPPING	30.07.2009	DUO-GE	LUGRIN, Anne-Emmanuelle	Oral pharmaceutical dosage form containing at least two medicaments, in which form the medicaments on the one hand are brought together in a leakproof and in-vivo water soluble wrapping and on the other hand are separated so that the active principle of the combined medicaments cannot come into contact with one another, at least one of the medicaments being selected from the following therapeutic…	1		Polypill prototype	2 or more with 2 or more other categories	acetylsalicylic acid, propranolol, clopidogrel	spironolactone, clarithromycin, amoxycillin, potassium	non-steroidal anti-inflammatory drug (NSAID), proton pump inhibitor (PPI), beta-blocker, statin, conversion enzyme inhibitor (CEI), biguanide, myorelaxant, calcium inhibitor, corticoid, antidepressant, benzodiazepine, non-atropine-like intestinal transit retarder, intestinal antibacterial
	WO2012011882	A COMBINATION OF ATORVASTATIN AND ASPIRIN TO BE USED IN THE TREATMENT OF CARDIOVASCULAR DISEASES	26.01.2012	BILGIC, Mahmut	BILGIC, Mahmut	The present invention relates to pharmaceutical compositions comprising aspirin and atorvastatin and/or their pharmaceutically acceptable salts, hydrates, enantiomers, racemates, organic salts, inorganic salts, esters, polymorphs, crystal forms and amorphous forms and/or combinationsthereof in order to be used in the treatment and prophylaxis of cardiovascular diseases.	1		Co-formulation	2 specific drugs	aspirin, atorvastatin
	WO2012002919	PHARMACEUTICAL FORMULATIONS COMPRISING ATORVASTATIN AND ASPIRIN	05.01.2012	BILGIC, Mahmut	BILGIC, Mahmut	The present invention relates to pharmaceutical compositions comprising aspirin and atorvastatin and/or pharmaceutically acceptable salts, hydrates, enantiomers, racemates, organic salts, inorganic salts, esters, polymorphs, crystal forms and amorphous forms thereof and/or theircombinations in order to be used in the treatment and prophylaxis of cardiovascular diseases.	1		Co-formulation	2 specific drugs	aspirin, atorvastatin
	WO2012002920	NEW DOSAGE FORMS FOR TREATMENT OF CARDIOVASCULAR DISEASES	05.01.2012	BILGIC, Mahmut	BILGIC, Mahmut	The present invention relates to dosage forms comprising effective amounts of aspirin and atorvastatin or their pharmaceutically acceptable salts, hydrates, enantiomers, racemates, organic salts, inorganic salts, esters, polymorphs, crystal forms and amorphous forms and/or combinationsthereof; and to dosage forms comprising combinations thereof	1		Co-formulation	2 specific drugs	aspirin, atorvastatin
	WO2011096665	COMPLEX FORMULATION COMPRISING ASPIRIN COATED WITH BARRIER CONTAINING HYDROPHOBIC ADDITIVE, AND HMG-COA REDUCTASE INHIBITOR	11.08.2011	HANMI SCIENCE CO., LTD.	WOO, Jong Soo	Provided is a complex formulation for the prevention or treatment of cardiovascular diseases, comprising: a) aspirin coated with a barrier containing a hydrophobic additive; and b) an HMG-CoA reductase inhibitor, which has improved storage stability by preventing the deterioration in the stability of HMG-CoA reductase which is caused by salicylic acid, thereby being used in the treatment of hyper…	1		Co-formulation	1 specific drug with other category(ies)	aspirin		HMG-CoA reductase inhibitor
	WO2012081905	PHARMACEUTICAL COMPOSITE FORMULATION COMPRISING HMG-COA REDUCTASE INHIBITOR AND ASPIRIN	21.06.2012	HANMI SCIENCE CO., LTD.	KIM, Yong Il	Provided is a pharmaceutical composite formulation for preventing or treating cardiovascular diseases, which comprises (1) a first particle comprising an HMG-CoA reductase inhibitor and a basic additive; and (2) a second particle comprising a core containing aspirin and an enteric coating layer coated on said core, wherein the difference in the average diameters of said first and second particles…	1		Co-formulation	1 specific drug with other category(ies)	aspirin		HMG-CoA reductase inhibitor
	WO2010103384	COMPOSITIONS AND METHODS FOR TREATMENT AND PREVENTION OF CARDIOVASCULARDISEASE	16.09.2010	NUCITEC S.A. DE C.V.	DUARTE-VAZQUEZ, Miguel Angel	The present invention is in the fields of medicine, pharmaceuticals, neutraceuticals and cardiology. In one aspect, the invention providescompositions comprising enalapril and simvastatin for use in methods for the treatment and/or prevention of cardiovascular disease, and to the use of such compositions in the manufacture of products for such treatment and/or prevention. In another aspect, the i…	1		Co-formulation	3 specific drugs	enalapril, simvastatin, acetylsalicylic acid
	WO2010127205	FIXED DOSE DRUG COMBINATION FORMULATIONS	04.11.2010	DR. REDDY'S LABORATORIES LTD	SASMAL, Badal Kumar	Pharmaceutical formulations comprising multiple drugs, for treating or preventing cardiovascular disease. Embodiments are capsules containing individual drugs, or combinations of drugs, in the form of small tablets.	1		Polypill prototype	Combinationations of categories	aspirin, lovastatin, atorvastatin, simvastatin, fluvastatin, rosuvastatin, or pravastatin, enalapril, lisinopril, perindopril, trandolapril, ramipril, losartan, irbesartan, olmesartan, candesartan, valsartan, telmisartan, metoprolol, or propranolol, chlorothiazide, hydrochlorothiazide, indapamide	tenolol	a cholesterol lowering agent, an inhibitor of the renin-angiotensin system, a beta-adrenergic receptor blocking agent or a diuretic, HMG CoA reductase inhibitor,
6. All patents	DE236196, US2890240, US3235583, US8865187, US5972916, US6015577, WO2009022821, WO2009092819 , WO2012011882, WO2012002919, WO2012002920, WO2011096665, WO2012081905, WO2010103384, WO2010127205
7. Starting patents with families
	Thomson Innovation Patent Export, 2015-05-04 18:54:32 -0400
	Publication Number	Title	Abstract	Application Date	Application Number	Priority Number	Priority Date	Publication Date	Assignee/Applicant	INPADOC Family Members	DWPI Family Members	Title - DWPI	INPADOC Family ID	INPADOC Legal Status	Reassignment (US)	Maintenance Status (US)	Opposition (EP)	License (EP)	DWPI Count of Family Members	DWPI Count of Family Countries	Related Applications
	DE236196C1			0001-01-01	DED236196A
	US5972916A	Compositions containing the nonprescription combination of acetaminophen, aspirin and caffeine to alleviate the pain and symptoms of migraine	The invention provides a safe and economical nonprescription combination of acetaminophen, aspirin and caffeine (APAP/ASA/CAF) for use in treating migraine pain and the cluster of symptoms characteristic of migraine attack, such as nausea, photophobia, phonophobia and functional disabilities. The use of the APAP/ASA/CAF combination is also effective in aborting the prodrome phase of a migraine at…	1998-02-10	US199821284A	US199752426P	1997-07-14	1999-10-26	Bristol Myers Squibb Company,New York,NY,US	US5972916A | AR16337A1 | AT240105T | AU199881705A | CA2296492A1 | CA2296492C | DE69814636D1 | DE69814636T2 | DK994714T3 | EP994714A1 | EP994714B1 | ES2198725T3 | MY121730A | PT994714E | TW565447B | WO1999003475A1 | ZA199806219A	WO1999003475A1 | AU199881705A | US5972916A | ZA199806219A | EP994714A1 | EP994714B1 | DE69814636D1 | ES2198725T3 | TW565447B | CA2296492C | MY121730A	Method for treating migraine pain and cluster of symptoms characteristic of migraine attack comprises administration of composition comprising acetaminophen, aspirin and caffeine	19990128CA2296492A1	2011-03-30 FPAY FEE PAYMENT + | 2007-03-30 FPAY FEE PAYMENT + | 2005-10-21 AS ASSIGNMENT NOVARTIS AG, SWITZERLAND ASSIGNMENT OF ASSIGNORS INTEREST;ASSIGNOR:BRISTOL-MYERS SQUIBB COMPANY;REEL/FRAME:017115/0506 2005-08-24 | 2003-03-31 FPAY FEE PAYMENT + | 1998-02-10 AS ASSIGNMENT BRISTOL-MYERS SQUIBB COMPANY, NEW YORK ASSIGNMENT OF ASSIGNORS INTEREST;ASSIGNORS:ARMELLINO, JOSEPH;KOSLO, RANDY;REEL/FRA…	NOVARTIS AG,BASEL,CH NOVARTIS AG|LICHTSTRASSE 35 BASEL SWITZERLAND 4056 NOVARTIS AG BRISTOL-MYERS SQUIBB COMPANY 2005-08-24 2005 017115/0506 2005-10-21 2005 ASSIGNMENT OF ASSIGNORS INTEREST (SEE DOCUMENT FOR DETAILS). NOVARTIS CORPORATE INTELLECTUAL PROPERTY ONE HEALTH PLAZA BUILDING 104 EAST HANOVER, NJ 07936-1080 | BRISTOL-MYERS SQUIBB COMPANY,NEW YORK,NY,US BRISTOL-MYERS SQUIBB COMPANY|345 PAR…				11	79
	US6015577A	Pharmaceutical compositions containing dipyridamole or mopidamol and acetylsalicylic acid or the physiologically acceptable salts thereof, processes for preparing them and their use in treating clot formation	The specification describes a pharmaceutical combination consisting of dipyridamole or mopidamol and acetylsalicylic acid or the physiologically acceptable salts thereof, processes for preparing this pharmaceutical combination and the use thereof for the controlled prevention of clot formation.	1995-04-12	US1995421351A	DE3627423A | US198784648A | US1988240981A | US1989423108A | US1990584393A | US1991750345A | US1992879258A | US19933909A | US1994261789A	1986-08-13 | 1987-08-12 | 1988-09-06 | 1989-10-18 | 1990-09-18 | 1991-08-27 | 1992-05-06 | 1993-01-13 | 1994-06-20	2000-01-18	Thomae GmbH Dr. Karl,Biberach an der Riss,DE	US6015577A | AT59961T | AU198776795A | AU603146B2 | CA1302272C | CL2004001252A1 | DD263918A5 | DE10299015I1 | DE10299015I2 | DE3627423A1 | DE3767408D1 | DK172236B1 | DK198704211A | DK198704211D0 | EP257344A1 | EP257344B1 | FI198703492A0 | FI198703492A | FI873492A0 | GR3001695T3 | HK1994144A | HU202404B | HU44937T | IE19872152L | IE60862B1 | IL83510A | IL83510D0 | JP02593879B2 | JP63048219A | KR19…	DE3627423A1 | EP257344A1 | JP63048219A | AU198776795A | NO198703370A | FI198703492A | DK198704211A | HU44937T | PT85525A | ZA198705947A | DD263918A | EP257344B1 | DE3767408D1 | ES2020974B | IL83510A | CA1302272C | NO175132B | PH27176A | JP02593879B2 | DK172236B | BR1100593A3 | KR199509098B1 | US6015577A	Antithrombotics, platelet aggregation inhibitors contg. combination of dipyridamole or mopidamol and O-acetyl-acid salicylic	19870812DK198704211D0	2011-07-12 FPAY FEE PAYMENT + | 2009-09-08 CC CERTIFICATE OF CORRECTION | 2009-07-10 AS ASSIGNMENT BOEHRINGER INGELHEIM PHARMA GMBH & CO. KG, GERMANY CHANGE OF NAME;ASSIGNOR:BOEHRINGER INGELHEIM PHARMA KG;REEL/FRAME:022939/0289 2003-02-18 | 2009-07-10 AS ASSIGNMENT BOEHRINGER INGELHEIM PHARMA GMBH & CO. KG, GERMANY ASSIGNMENT OF ASSIGNORS INTEREST;ASSIGNOR:WEISENBERGER, HANS;REEL/FRAME:022939/021…	BOEHRINGER INGELHEIM PHARMA KG,INGELHEIM,DE BOEHRINGER INGELHEIM PHARMA KG|POSTFACH 200 INGELHEIM GERMANY D55216 BOEHRINGER INGELHEIM PHARMA KG THOMAE, KARL, DR. 2009-03-30 2009 022939/0287 2009-07-10 2009 NUNC PRO TUNC ASSIGNMENT (SEE DOCUMENT FOR DETAILS). TIMOTHY X. GIBSON GIBSON & DERNIER LLP 900 ROUTE 9 NORTH WOODBRIDGE, NJ 07095 | BOEHRINGER INGELHEIM PHARMA GMBH & CO. KG,INGELHEIM AM RHEIN…	CC			23	28	US1992879258A,1992-05-06 | US19933909A,1993-01-13 | US1994261789A,1994-06-20 | US1991750345A,1991-08-27 | US198784648A,1987-08-12 | US1990584393A,1990-09-18 | US1989423108A,1989-10-18 | US1988240981A,1988-09-06
	US3235583A	Preparation of aspirin		1964-07-22	US1964384544A	US1964384544A	1964-07-22	1966-02-15	NORWICH PHARMA CO	US3235583A	GB896715A | CH381246A | DE1155140A1 | JP67002580B | US3235583A	Acetylsalicylic acid	19660215US3235583A_	1982-06-28 AS ASSIGNMENT NORWICH EATON PHARMACEUTICALS, INC., 17 EATON AVE. ASSIGNMENT OF ASSIGNORS INTEREST.;ASSIGNOR:MORTON-NORWICH PRODUCTS, INC., A CORP. OF DE;REEL/FRAME:004085/0126 1982-06-09	NORWICH EATON PHARMACEUTICALS INC. A CORP. OF OH,NORWICH,NY,US NORWICH EATON PHARMACEUTICALS INC. A CORP. OF OH|17 EATON AVE. NORWICH NEW YORK NORWICH EATON PHARMACEUTICALS, INC., A CORP. OF OH MORTON-NORWICH PRODUCTS, INC., A CORP. OF DE 1982-06-09 1982 004085/0126 1982-06-28 1982 ASSIGNMENT OF ASSIGNORS INTEREST. NORWICH EATON PHARMACEUTICALS, INC. 17 EATON AVE., NORWICH, NY 13815				5	5
	US2890240A	Aspirin crystallisation		1957-03-26	US1957648518A	GBX2890240A	1956-03-28	1959-06-09	MONSANTO CHEMICALS	US2890240A			19590609US2890240A_
	US8865187B2	Compositions comprising lecithin oils and NSAIDs for protecting the gastrointestinal tract and providing enhanced therapeutic activity	A novel pharmaceutical composition is provided by which nonsteroidal anti-inflammatory drugs (NSAIDs) are added directly to phospholipid-containing oil such as lecithin oils or to a bio-compatible oil to which an phospholipid has been added to make a NSAID-containing formulation that possess low gastrointestinal (GI) toxicity and enhanced therapeutic activity to treat or prevent inflammation, pai…	2010-09-16	US2010883873A	US2000256711P | WO2001US51605A | US2003433454A	2000-12-19 | 2001-12-19 | 2003-11-06	2014-10-21	The Board of Regents of the University of Texas System,Austin,TX,US | Lichtenberger Lenard M.,Houston,TX,US	US8865187B2 | AT414542T | AU2001297778B2 | AU2001297778C1 | BR200116380A | CA2431606A1 | CA2431606C | CN102258457A | CN1543358A | DE60136647D1 | DK1343529T3 | EP1343529A2 | EP1343529B1 | ES2317873T3 | IL156361A | IL156361D0 | JP04958381B2 | JP2005506303A | JP2010031044A | KR2003072565A | KR884493B1 | MX2003005550A | PT1343529E | SI1343529T1 | US20040077604A1 | US20100173876A1 | US20110034568A1 | …	WO2002085414A2 | EP1343529A2 | KR2003072565A | US20040077604A1 | AU2001297778A1 | MX2003005550A | CN1543358A | JP2005506303A | BR200116380A | IN200300739P2 | AU2001297778B2 | EP1343529B1 | DE60136647D1 | KR884493B1 | ES2317873T3 | IN221578B | JP2010031044A | TWI318885B | US20110034568A1 | MX282347B | US20110065677A1 | US20110071118A1 | IL156361A | CA2431606C | CN102258457A | WO2002085414A3 | JP04…	Compositions, useful for treating, e.g. tissue ulceration, pain, fever, cardiovascular disease, ovarian or colon cancer or Alzheimer's disease, comprises lecithin oil and non-steroidal antiinflammatory drug	20021031CA2431606A1	2010-11-03 AS ASSIGNMENT THE BOARD OF REGENTS OF THE UNIVERISTY OF TEXAS SY ASSIGNMENT OF ASSIGNORS INTEREST;ASSIGNOR:LICHTENBERGER, LENARD M;REEL/FRAME:025242/0333 2006-10-17	THE BOARD OF REGENTS OF THE UNIVERSITY OF TEXAS SYSTEM,AUSTIN,TX,US THE BOARD OF REGENTS OF THE UNIVERSITY OF TEXAS SYSTEM|201 W. 7TH STREET SUITE 820 AUSTIN TEXAS 78701 THE BOARD OF REGENTS OF THE UNIVERSITY OF TEXAS SYSTEM LICHTENBERGER, LENARD M. 2006-10-17 2006 031645/0863 2013-11-15 2013 CORRECTIVE ASSIGNMENT TO CORRECT THE ATTORNEY DOCKET NUMBER AND ASSIGNEES NAME PREVIOUSLY RECORDED ON REE…				31	98	US2010883873A,2010-09-16 | US2000256711P,2000-12-19 | US2003433454A,2003-11-06
	WO2010127205A3	FIXED DOSE DRUG COMBINATION FORMULATIONS | FORMULATIONS DE COMBINAISON DE MÉDICAMENT À DOSE FIXE	Pharmaceutical formulations comprising multiple drugs, for treating or preventing cardiovascular disease. Embodiments are capsules containing individual drugs, or combinations of drugs, in the form of small tablets. L'invention porte sur des formulations pharmaceutiques comprenant de multiples médicaments, pour traiter ou prévenir une maladie cardiovasculaire. Les modes de réalisation sont des gé…	2010-04-30	WO2010US33097A	IN2009CH1015A | US2009256570P	2009-04-30 | 2009-10-30	2011-03-10	DR. REDDY'S LABORATORIES LTD.,IN | DR. REDDY'S LABORATORIES INC.,US | SASMAL Badal Kumar,IN | BILLA Praveen Reddy,IN | NASARE Vijay Dinanathji,IN | MOHAN Mailatur Sivaraman,IN | JAYANTHI Suryakumar,IN | DUBEY Rajesh,IN | AVVARU Seshasayana,IN | SATTI Phanikumar Reddy,IN | MANAS Ranjan Mund,IN | CHIDIPOTHU Anitha,IN | JAIN Varun,IN	WO2010127205A3 | AU2004261212A1 | AU2004261212B2 | AU2010242938A1 | AU2010242938A2 | BR200412557A | CA2531279A1 | CN1822820A | EP1648422A2 | EP1648422A4 | EP2424509A2 | EP2424509A4 | NZ544784A | NZ596064A | RU2006102356A | RU2380093C2 | US20050026992A1 | US20100068269A1 | US20120045505A1 | WO2005011586A2 | WO2005011586A3 | WO2010127205A2 | ZA200600733A	WO2010127205A2 | WO2010127205A3 | AU2010242938A2 | AU2010242938A1 | US20120045505A1 | EP2424509A2 | IN201108134P4 | NZ596064A	Pharmaceutical formulation, used for reducing the risk of cardiovascular disease and cerebrovascular disease, comprises cholesterol lowering agent, aspirin, renin-angiotensin system inhibitor, and beta-adrenergic receptor blocking agent	20050203US20050026992A1	2011-11-17 ENP ENTRY INTO THE NATIONAL PHASE IN: AU 2010242938 A 2010-04-30 | 2011-10-28 WWE WIPO INFORMATION: ENTRY INTO NATIONAL PHASE + NZ 596064 | 2010-12-29 121 EP: THE EPO HAS BEEN INFORMED BY WIPO THAT EP WAS DESIGNATED IN THIS APPLICATION EP 10770398 A2					8	125	US2004898549A,2004-07-28
	WO2010127205A2	FIXED DOSE DRUG COMBINATION FORMULATIONS | FORMULATIONS DE COMBINAISON DE MÉDICAMENT À DOSE FIXE	Pharmaceutical formulations comprising multiple drugs, for treating or preventing cardiovascular disease. Embodiments are capsules containing individual drugs, or combinations of drugs, in the form of small tablets. L'invention porte sur des formulations pharmaceutiques comprenant de multiples médicaments, pour traiter ou prévenir une maladie cardiovasculaire. Les modes de réalisation sont des gé…	2010-04-30	WO2010US33097A	IN2009CH1015A | US2009256570P	2009-04-30 | 2009-10-30	2010-11-04	DR. REDDY'S LABORATORIES LTD.,IN | DR. REDDY'S LABORATORIES INC.,US | SASMAL Badal Kumar,IN | BILLA Praveen Reddy,IN | NASARE Vijay Dinanathji,IN | MOHAN Mailatur Sivaraman,IN | JAYANTHI Suryakumar,IN | DUBEY Rajesh,IN | AVVARU Seshasayana,IN | SATTI Phanikumar Reddy,IN | MANAS Ranjan Mund,IN | CHIDIPOTHU Anitha,IN | JAIN Varun,IN	WO2010127205A2 | AU2004261212A1 | AU2004261212B2 | AU2010242938A1 | AU2010242938A2 | BR200412557A | CA2531279A1 | CN1822820A | EP1648422A2 | EP1648422A4 | EP2424509A2 | EP2424509A4 | NZ544784A | NZ596064A | RU2006102356A | RU2380093C2 | US20050026992A1 | US20100068269A1 | US20120045505A1 | WO2005011586A2 | WO2005011586A3 | WO2010127205A3 | ZA200600733A	WO2010127205A2 | WO2010127205A3 | AU2010242938A2 | AU2010242938A1 | US20120045505A1 | EP2424509A2 | IN201108134P4 | NZ596064A	Pharmaceutical formulation, used for reducing the risk of cardiovascular disease and cerebrovascular disease, comprises cholesterol lowering agent, aspirin, renin-angiotensin system inhibitor, and beta-adrenergic receptor blocking agent	20050203US20050026992A1	2011-11-17 ENP ENTRY INTO THE NATIONAL PHASE IN: AU 2010242938 A 2010-04-30 | 2011-10-28 WWE WIPO INFORMATION: ENTRY INTO NATIONAL PHASE + NZ 596064 | 2010-12-29 121 EP: THE EPO HAS BEEN INFORMED BY WIPO THAT EP WAS DESIGNATED IN THIS APPLICATION EP 10770398 A2					8	125	US2004898549A,2004-07-28
	WO2009022821A3	COMBINATION PREPARATION COMPRISING INHIBITOR OF HMG-COA REDUCTASE AND ASPIRIN AND METHOD FOR MANUFACTURING THE SAME | PRÉPARATION COMBINÉE CONTENANT UN INHIBITEUR DE HMG-COA REDUCTASE ET ASPIRINE ET SON PROCÉDÉ D'ÉLABORATION	The present invention relates to a chronotherapeutically combined pharmaceutical formulation for preventing and treating cardiovascular diseases, which is based on the principle of administering a plurality of drugs at certain time intervals (chronotherapy). Specifically, the combined pharmaceutical formulation comprises a HMG-CoA reductase inhibitor, such as simvastatin, and aspirin. Because the…	2008-08-08	WO2008KR4623A	KR200781206A	2007-08-13	2009-04-09	HANALL PHARMACEUTICAL COMPANY. LTD,KR | KIM Sung Wuk,KR | JUN Sung Soo,KR | JO Young Gwan,KR | KOO Ja Seong,KR | SUN Sang Ouk,KR	WO2009022821A3 | EP2180891A2 | EP2180891A4 | KR2009017423A | KR955669B1 | US20120015032A1 | WO2009022821A2	WO2009022821A2 | KR2009017423A | WO2009022821A3 | EP2180891A2 | KR955669B1 | US20120015032A1	Formulation, useful for preventing or treating cardiovascular disease, hyperlipidemia and arteriosclerosis, comprises 5-hydroxy-3-methylglutaryl-coenzyme A reductase inhibitor; and Aspirin	20090218KR2009017423A_	2010-02-16 NENP NON-ENTRY INTO THE NATIONAL PHASE IN: DE | 2010-02-08 WWE WIPO INFORMATION: ENTRY INTO NATIONAL PHASE + US 12672630 | 2009-04-08 121 EP: THE EPO HAS BEEN INFORMED BY WIPO THAT EP WAS DESIGNATED IN THIS APPLICATION EP 08793137 A2					6	123
	WO2009022821A2	COMBINATION PREPARATION COMPRISING INHIBITOR OF HMG-COA REDUCTASE AND ASPIRIN AND METHOD FOR MANUFACTURING THE SAME | PRÉPARATION COMBINÉE CONTENANT UN INHIBITEUR DE HMG-COA REDUCTASE ET ASPIRINE ET SON PROCÉDÉ D'ÉLABORATION	The present invention relates to a chronotherapeutically combined pharmaceutical formulation for preventing and treating cardiovascular diseases, which is based on the principle of administering a plurality of drugs at certain time intervals (chronotherapy). Specifically, the combined pharmaceutical formulation comprises a HMG-CoA reductase inhibitor, such as simvastatin, and aspirin. Because the…	2008-08-08	WO2008KR4623A	KR200781206A	2007-08-13	2009-02-19	HANALL PHARMACEUTICAL COMPANY. LTD,KR | KIM Sung Wuk,KR | JUN Sung Soo,KR | JO Young Gwan,KR | KOO Ja Seong,KR | SUN Sang Ouk,KR	WO2009022821A2 | EP2180891A2 | EP2180891A4 | KR2009017423A | KR955669B1 | US20120015032A1 | WO2009022821A3	WO2009022821A2 | KR2009017423A | WO2009022821A3 | EP2180891A2 | KR955669B1 | US20120015032A1	Formulation, useful for preventing or treating cardiovascular disease, hyperlipidemia and arteriosclerosis, comprises 5-hydroxy-3-methylglutaryl-coenzyme A reductase inhibitor; and Aspirin	20090218KR2009017423A_	2010-02-16 NENP NON-ENTRY INTO THE NATIONAL PHASE IN: DE | 2010-02-08 WWE WIPO INFORMATION: ENTRY INTO NATIONAL PHASE + US 12672630 | 2009-04-08 121 EP: THE EPO HAS BEEN INFORMED BY WIPO THAT EP WAS DESIGNATED IN THIS APPLICATION EP 08793137 A2					6	123
	WO2011096665A3	COMPLEX FORMULATION COMPRISING ASPIRIN COATED WITH BARRIER CONTAINING HYDROPHOBIC ADDITIVE, AND HMG-COA REDUCTASE INHIBITOR | FORMULATION COMPLEXE COMPRENANT DE L'ASPIRINE ENROBÉE D'UNE BARRIÈRE CONTENANT UN ADDITIF HYDROPHOBE, ET UN INHIBITEUR D'HMG-COA RÉDUCTASE	Provided is a complex formulation for the prevention or treatment of cardiovascular diseases, comprising: a) aspirin coated with a barrier containing a hydrophobic additive; and b) an HMG-CoA reductase inhibitor, which has improved storage stability by preventing the deterioration in the stability of HMG-CoA reductase which is caused by salicylic acid, thereby being used in the treatment of hyper…	2011-01-26	WO2011KR541A	KR20109636A	2010-02-02	2012-01-05	HANMI HOLDINGS CO. LTD.,KR | WOO Jong Soo,KR | PARK Jae Hyun,KR | KIM Yong Il,KR | NA Young Jun,KR | CHOI Jun Young,KR | LEE Yun Ah,KR	WO2011096665A3 | AR80023A1 | CN102740857A | EP2531199A2 | EP2531199A4 | JP2013518873A | KR1193493B1 | KR2011090060A | TW201141487A | US20120301549A1 | WO2011096665A2	WO2011096665A2 | KR2011090060A | WO2011096665A3 | TW201141487A | KR1193493B1 | US20120301549A1 | EP2531199A2 | CN102740857A | JP2013518873A	Complex formulation for preventing or treating cardiovascular diseases comprises aspirin coated with barrier containing hydrophobic additive and 3-hydroxy-3-methylglutaryl-coenzyme A reductase inhibitor	20110810KR2011090060A_	2012-08-01 WWE WIPO INFORMATION: ENTRY INTO NATIONAL PHASE + JP 2012551908 | 2012-08-01 WWE WIPO INFORMATION: ENTRY INTO NATIONAL PHASE + US 13576585 | 2012-08-01 ENP ENTRY INTO THE NATIONAL PHASE IN: JP 2012551908 A | 2011-09-28 121 EP: THE EPO HAS BEEN INFORMED BY WIPO THAT EP WAS DESIGNATED IN THIS APPLICATION EP 11739961 A1					9	126
	WO2011096665A2	COMPLEX FORMULATION COMPRISING ASPIRIN COATED WITH BARRIER CONTAINING HYDROPHOBIC ADDITIVE, AND HMG-COA REDUCTASE INHIBITOR | FORMULATION COMPLEXE COMPRENANT DE L'ASPIRINE ENROBÉE D'UNE BARRIÈRE CONTENANT UN ADDITIF HYDROPHOBE, ET UN INHIBITEUR D'HMG-COA RÉDUCTASE	Provided is a complex formulation for the prevention or treatment of cardiovascular diseases, comprising: a) aspirin coated with a barrier containing a hydrophobic additive; and b) an HMG-CoA reductase inhibitor, which has improved storage stability by preventing the deterioration in the stability of HMG-CoA reductase which is caused by salicylic acid, thereby being used in the treatment of hyper…	2011-01-26	WO2011KR541A	KR20109636A	2010-02-02	2011-08-11	HANMI HOLDINGS CO. LTD.,KR | WOO Jong Soo,KR | PARK Jae Hyun,KR | KIM Yong Il,KR | NA Young Jun,KR | CHOI Jun Young,KR | LEE Yun Ah,KR	WO2011096665A2 | AR80023A1 | CN102740857A | EP2531199A2 | EP2531199A4 | JP2013518873A | KR1193493B1 | KR2011090060A | TW201141487A | US20120301549A1 | WO2011096665A3	WO2011096665A2 | KR2011090060A | WO2011096665A3 | TW201141487A | KR1193493B1 | US20120301549A1 | EP2531199A2 | CN102740857A | JP2013518873A	Complex formulation for preventing or treating cardiovascular diseases comprises aspirin coated with barrier containing hydrophobic additive and 3-hydroxy-3-methylglutaryl-coenzyme A reductase inhibitor	20110810KR2011090060A_	2012-08-01 WWE WIPO INFORMATION: ENTRY INTO NATIONAL PHASE + US 13576585 | 2012-08-01 WWE WIPO INFORMATION: ENTRY INTO NATIONAL PHASE + JP 2012551908 | 2012-08-01 ENP ENTRY INTO THE NATIONAL PHASE IN: JP 2012551908 A | 2011-09-28 121 EP: THE EPO HAS BEEN INFORMED BY WIPO THAT EP WAS DESIGNATED IN THIS APPLICATION EP 11739961 A1					9	126
	WO2012081905A3	PHARMACEUTICAL COMPOSITE FORMULATION COMPRISING HMG-COA REDUCTASE INHIBITOR AND ASPIRIN | FORMULATION PHARMACEUTIQUE COMPOSITE COMPRENANT UN INHIBITEUR DE LA HMG-COA RÉDUCTASE, ET ASPIRINE	Provided is a pharmaceutical composite formulation for preventing or treating cardiovascular diseases, which comprises (1) a first particle comprising an HMG-CoA reductase inhibitor and a basic additive; and (2) a second particle comprising a core containing aspirin and an enteric coating layer coated on said core, wherein the difference in the average diameters of said first and second particles…	2011-12-14	WO2011KR9628A	KR2010129838A	2010-12-17	2012-08-23	HANMI SCIENCE CO. LTD.,KR | KIM Yong Il,KR | NA Young Jun,KR | CHOI Jun Young,KR | KIM Min Jung,KR | PARK Jae Hyun,KR | WOO Jong Soo,KR	WO2012081905A3 | CN103282027A | EP2651401A2 | JP2014501240A | KR2012068277A | TW201306878A | US20130243872A1 | WO2012081905A2	WO2012081905A2 | KR2012068277A | WO2012081905A3 | TW201306878A | US20130243872A1 | EP2651401A2 | CN103282027A | JP2014501240A | HK1188564A0	Pharmaceutical formulation used for treating cardiovascular disease e.g. arteriosclerosis, comprises first particle containing 3-hydroxy-3-methyl-glutaryl-CoA reductase inhibitor, and second particle containing core containing aspirin	20120621WO2012081905A2	2013-06-14 ENP ENTRY INTO THE NATIONAL PHASE IN: JP 2013544394 A | 2013-05-22 WWE WIPO INFORMATION: ENTRY INTO NATIONAL PHASE + US 13988947 | 2012-08-08 121 EP: THE EPO HAS BEEN INFORMED BY WIPO THAT EP WAS DESIGNATED IN THIS APPLICATION EP 11848595 A2					9	129
	WO2012081905A2	PHARMACEUTICAL COMPOSITE FORMULATION COMPRISING HMG-COA REDUCTASE INHIBITOR AND ASPIRIN | FORMULATION PHARMACEUTIQUE COMPOSITE COMPRENANT UN INHIBITEUR DE LA HMG-COA RÉDUCTASE, ET ASPIRINE	Provided is a pharmaceutical composite formulation for preventing or treating cardiovascular diseases, which comprises (1) a first particle comprising an HMG-CoA reductase inhibitor and a basic additive; and (2) a second particle comprising a core containing aspirin and an enteric coating layer coated on said core, wherein the difference in the average diameters of said first and second particles…	2011-12-14	WO2011KR9628A	KR2010129838A	2010-12-17	2012-06-21	HANMI HOLDINGS CO. LTD.,KR | KIM Yong Il,KR | NA Young Jun,KR | CHOI Jun Young,KR | KIM Min Jung,KR | PARK Jae Hyun,KR | WOO Jong Soo,KR	WO2012081905A2 | CN103282027A | EP2651401A2 | JP2014501240A | KR2012068277A | TW201306878A | US20130243872A1 | WO2012081905A3	WO2012081905A2 | KR2012068277A | WO2012081905A3 | TW201306878A | US20130243872A1 | EP2651401A2 | CN103282027A | JP2014501240A | HK1188564A0	Pharmaceutical formulation used for treating cardiovascular disease e.g. arteriosclerosis, comprises first particle containing 3-hydroxy-3-methyl-glutaryl-CoA reductase inhibitor, and second particle containing core containing aspirin	20120621WO2012081905A2	2013-06-14 ENP ENTRY INTO THE NATIONAL PHASE IN: JP 2013544394 A | 2013-05-22 WWE WIPO INFORMATION: ENTRY INTO NATIONAL PHASE + US 13988947 | 2012-08-08 121 EP: THE EPO HAS BEEN INFORMED BY WIPO THAT EP WAS DESIGNATED IN THIS APPLICATION EP 11848595 A2					9	129
	WO2012011882A1	A COMBINATION OF ATORVASTATIN AND ASPIRIN TO BE USED IN THE TREATMENT OF CARDIOVASCULAR DISEASES | COMBINAISON D'ATORVASTATINE ET D'ASPIRINE DESTINÉE À ÊTRE UTILISÉE DANS LE TRAITEMENT DE MALADIES CARDIOVASCULAIRES	The present invention relates to pharmaceutical compositions comprising aspirin and atorvastatin and/or their pharmaceutically acceptable salts, hydrates, enantiomers, racemates, organic salts, inorganic salts, esters, polymorphs, crystal forms and amorphous forms and/or combinations thereof in order to be used in the treatment and prophylaxis of cardiovascular diseases. La présente invention con…	2011-06-29	WO2011TR162A	TR20105325A	2010-06-30	2012-01-26	BILGIC Mahmut,TR	WO2012011882A1 | EP2588102A1 | EP2588103A1 | TR201005325A2 | WO2012002919A1 | WO2012002920A1	WO2012011882A1 | EP2588103A1	Capsule formulation, useful in treatment and prophylaxis of cardiovascular diseases (e.g. hypercholesterolemia, angina pectoris and atherosclerosis), comprises atorvastatin formulation in powder form and aspirin formulation in tablet form	20120105WO2012002919A1	2012-03-14 121 EP: THE EPO HAS BEEN INFORMED BY WIPO THAT EP WAS DESIGNATED IN THIS APPLICATION EP 11764886 A1					2	125
	WO2012002920A1	NEW DOSAGE FORMS FOR TREATMENT OF CARDIOVASCULAR DISEASES | NOUVELLES FORMES PHARMACEUTIQUES POUR LE TRAITEMENT DE MALADIES CARDIOVASCULAIRES	The present invention relates to dosage forms comprising effective amounts of aspirin and atorvastatin or their pharmaceutically acceptable salts, hydrates, enantiomers, racemates, organic salts, inorganic salts, esters, polymorphs, crystal forms and amorphous forms and/or combinations thereof; and to dosage forms comprising combinations thereof. La présente invention concerne des formes pharmace…	2011-06-29	WO2011TR163A	TR20105325A	2010-06-30	2012-01-05	BILGIC Mahmut,TR	WO2012002920A1 | EP2588102A1 | EP2588103A1 | TR201005325A2 | WO2012002919A1 | WO2012011882A1	WO2012002920A1 | EP2588102A1	Dosage form used to treat e.g. heart attack comprises atorvastatin calcium in micro tablet/granule powder/pellet form and aspirin in tablet form which is enterically coated and has a sub-coating layer between the coating and aspirin layer	20120105WO2012002919A1	2012-02-29 121 EP: THE EPO HAS BEEN INFORMED BY WIPO THAT EP WAS DESIGNATED IN THIS APPLICATION EP 11746335 A1					2	125
	WO2012002919A1	PHARMACEUTICAL FORMULATIONS COMPRISING ATORVASTATIN AND ASPIRIN | FORMULATIONS PHARMACEUTIQUES COMPRENANT DE L'ATORVASTATINE ET DE L'ASPIRINE	The present invention relates to pharmaceutical compositions comprising aspirin and atorvastatin and/or pharmaceutically acceptable salts, hydrates, enantiomers, racemates, organic salts, inorganic salts, esters, polymorphs, crystal forms and amorphous forms thereof and/or their combinations in order to be used in the treatment and prophylaxis of cardiovascular diseases. La présente invention con…	2011-06-29	WO2011TR161A	TR20105325A	2010-06-30	2012-01-05	BILGIC Mahmut,TR	WO2012002919A1 | EP2588102A1 | EP2588103A1 | TR201005325A2 | WO2012002920A1 | WO2012011882A1	WO2012002919A1	Pharmaceutical formulation used for, e.g. treating hypercholesterolemia, comprises atorvastatin and aspirin	20120105WO2012002919A1	2013-07-24 122 EP: PCT APP. NOT ENT. EUROP. PHASE - EP 11740740 A1 | 2012-02-29 121 EP: THE EPO HAS BEEN INFORMED BY WIPO THAT EP WAS DESIGNATED IN THIS APPLICATION EP 11740740 A1					1	113
	WO2009092819A1	COMBINATION OF ORAL MEDICAMENTS BONDED BY A WRAPPING | COMBINAISON DE MÉDICAMENTS ORAUX RÉUNIS PAR UNE ENVELOPPE	Oral pharmaceutical dosage form containing at least two medicaments, in which form the medicaments on the one hand are brought together in a leakproof and in-vivo water soluble wrapping and on the other hand are separated so that the active principle of the combined medicaments cannot come into contact with one another, at least one of the medicaments being selected from the following therapeutic…	2009-01-26	WO2009EP50858A	FR200850461A | FR200850460A | US20086652P | US20086651P	2008-01-25 | 2008-01-25 | 2008-01-25 | 2008-01-25	2009-07-30	DUO-GE,FR | LUGRIN Anne-Emmanuelle,FR | GRISCELLI Claude,FR | EL GLAOUI Mehdi,CH | EL GLAOUI Guillaume,FR | HOFFELT Jean,FR	WO2009092819A1 | AU2009207580A1 | AU2009207580A8 | AU2009207580B2 | AU2009207580B8 | CA2713197A1 | CN101969933A | EP2249815A1 | FR2926723A1 | FR2926723B1 | FR2926724A1 | FR2926724B1 | JP2011510049A | JP2015042672A | MX2010008071A | RU2010135514A | RU2493832C2 | US20110027356A1	WO2009092819A1 | FR2926723A1 | FR2926724A1 | FR2926723B1 | FR2926724B1 | AU2009207580A1 | EP2249815A1 | CA2713197A1 | US20110027356A1 | MX2010008071A | CN101969933A | JP2011510049A | IN201001618P3 | RU2010135514A | RU2493832C2 | AU2009207580B2 | AU2009207580A8 | AU2009207580B8 | JP2015042672A	Oral pharmaceutical dosage form e.g. for treatment of hypercholesterolemia, comprises medicaments brought together in water-soluble wrapping and separated so that active principles in combined medicaments do not contact with one another	20090730AU2009207580A1	2010-10-12 WWE WIPO INFORMATION: ENTRY INTO NATIONAL PHASE + US 12864397 | 2010-08-25 WWE WIPO INFORMATION: ENTRY INTO NATIONAL PHASE + RU 2010135514 | 2010-08-25 ENP ENTRY INTO THE NATIONAL PHASE IN: RU 2010135514 A | 2010-08-19 ENP ENTRY INTO THE NATIONAL PHASE IN: AU 2009207580 A 2009-01-26 | 2010-07-27 NENP NON-ENTRY INTO THE NATIONAL PHASE IN: DE | 2010-07-26 WWE WIPO INFORMATION: ENTRY INTO…					19	123
	WO2010103384A1	COMPOSITIONS AND METHODS FOR TREATMENT AND PREVENTION OF CARDIOVASCULAR DISEASE | COMPOSITIONS ET MÉTHODES DE TRAITEMENT ET PRÉVENTION DE MALADIES CARDIOVASCULAIRES	The present invention is in the fields of medicine, pharmaceuticals, neutraceuticals and cardiology. In one aspect, the invention provides compositions comprising enalapril and simvastatin for use in methods for the treatment and/or prevention of cardiovascular disease, and to the use of such compositions in the manufacture of products for such treatment and/or prevention. In another aspect, the …	2010-03-10	WO2010IB506A	US2009160110P	2009-03-13	2010-09-16	NUCITEC S.A. DE C.V.,MX | DUARTE-VAZQUEZ Miguel Angel,MX | ROSADO LORIA Jorge Luis,MX	WO2010103384A1 | CA2755543A1 | CO6420389A2 | EP2405747A1 | EP2405747A4 | MX2011009587A | PE20120647A1 | US20100234442A1	WO2010103384A1 | US20100234442A1 | CA2755543A1 | MX2011009587A | EP2405747A1	Pharmaceutical composition for treating cardiovascular disease e.g. hypercholesterolemia or hypertension comprises cholesterol lowering agent, angiotensin converting enzyme inhibitor and antiplatelet agent	20100916CA2755543A1	2011-09-13 WWE WIPO INFORMATION: ENTRY INTO NATIONAL PHASE + CA 2755543 | 2011-09-13 ENP ENTRY INTO THE NATIONAL PHASE IN: CA 2755543 | 2010-11-03 121 EP: THE EPO HAS BEEN INFORMED BY WIPO THAT EP WAS DESIGNATED IN THIS APPLICATION EP 10750431 A1					5	125
8. N. American extended	CA2296492A1 CA2296492C CA2431606A1 CA2431606C US20040077604A1 US20100173876A1 US20110034568A1 US20110065677A1 US20110071118A1 US20150011507A1 US6015577A US8865187B2 US8911752B2 US5972916A US6015577A US8865187B2 US8911752B2
	Thomson Innovation Patent Export, 2015-05-06 09:42:38 -0500
	Publication Number	Title	Abstract	Application Date	Application Number	Priority Number	Priority Date	Publication Date	Assignee/Applicant	INPADOC Family Members	DWPI Family Members	Title - DWPI	INPADOC Family ID	INPADOC Legal Status	Reassignment (US)	Maintenance Status (US)	Opposition (EP)	License (EP)	DWPI Count of Family Members	DWPI Count of Family Countries	Related Applications
	CA1302272C	PHARMACEUTICAL COMPOSITIONS CONTAINING DIPYRIDAMOLE OR MOPIDAMOL AND O-ACETYLSALICYLIC ACID OR THE PHYSIOLOGICALLY ACCEPTABLE SALTS THEREOF, PROCESSES FOR PREPARING THEM AND THEIR USE IN TREATING CLOT FORMATION | COMPOSITIONS PHARMACEUTIQUES CONTENANT DU DIPYRIDAMOLE OU DU MOPIDAMOI OU DE L'ACIDE O-ACETYLSALYCYLIQUE OU DES SELS PHYSIOLOGIQUEMENT ACCEPTABLES DE CEUX-CI, PROCEDE POUR LEUR PREPARATI…	Abstract The specification describes a pharmaceutical combinationconsisting of dipyridamole or mopidamol and Oacetylsalicylic acid or the physiologically acceptablesalts thereof, processes for preparing this pharmaceutical combination and the use thereof for the controlled prevention of clot formation. The specification describes a pharmaceutical combination consisting of dipyridamole or mopidamo…	1987-08-11	CA544180A	DE3627423A	1986-08-13	1992-06-02	KARL THOMAE GESELLSCHAFT MIT BESCHRANKTER HAFTUNG,DE	CA1302272C | AT59961T | AU198776795A | AU603146B2 | CL2004001252A1 | DD263918A5 | DE10299015I1 | DE10299015I2 | DE3627423A1 | DE3767408D1 | DK172236B1 | DK198704211A | DK198704211D0 | EP257344A1 | EP257344B1 | FI198703492A0 | FI198703492A | FI873492A0 | GR3001695T3 | HK1994144A | HU202404B | HU44937T | IE19872152L | IE60862B1 | IL83510A | IL83510D0 | JP02593879B2 | JP63048219A | KR199509098B1 | N…	DE3627423A1 | EP257344A1 | JP63048219A | AU198776795A | NO198703370A | FI198703492A | DK198704211A | HU44937T | PT85525A | ZA198705947A | DD263918A | EP257344B1 | DE3767408D1 | ES2020974B | IL83510A | CA1302272C | NO175132B | PH27176A | JP02593879B2 | DK172236B | BR1100593A3 | KR199509098B1 | US6015577A	Antithrombotics, platelet aggregation inhibitors contg. combination of dipyridamole or mopidamol and O-acetyl-acid salicylic	19870812DK198704211D0	2009-06-02 MKEX EXPIRY -					23	28
	CA2296492A1	USE OF COMPOSITIONS CONTAINING THE COMBINATION OF ACETAMINOPHEN, ASPIRIN AND CAFFEINE TO ALLEVIATE THE PAIN AND SYMPTOMS OF MIGRAINE | COMPOSITION D'ACETAMINOPHENE, D'ASPIRINE, ET DE CAFEINE ATTENUANT LA DOULEUR ET LES SYMPTOMES, DE LA MIGRAINE	The invention provides a safe and economical nonprescription combination of acetaminophen, aspirin and caffeine (APAP/ASA/CAF) for use in treating migraine pain and the cluster of symptoms characteristic of migraine attack, such as nausea, photophobia, phonophobia and functional disabilities. In accordance with the present invention, the use of the APAP/ASA/CAF combination is also effective in ab…	1998-06-25	CA2296492A	US199752426P | US199821284A | WO1998US13328A	1997-07-14 | 1998-02-10 | 1998-06-25	1999-01-28	SQUIBB BRISTOL MYERS CO	CA2296492A1 | AR16337A1 | AT240105T | AU199881705A | CA2296492C | DE69814636D1 | DE69814636T2 | DK994714T3 | EP994714A1 | EP994714B1 | ES2198725T3 | MY121730A | PT994714E | TW565447B | US5972916A | WO1999003475A1 | ZA199806219A			19990128CA2296492A1	2002-07-17 EEER EXAMINATION REQUEST +
	CA2296492C	USE OF COMPOSITIONS CONTAINING THE COMBINATION OF ACETAMINOPHEN, ASPIRIN AND CAFFEINE TO ALLEVIATE THE PAIN AND SYMPTOMS OF MIGRAINE | COMPOSITION D'ACETAMINOPHENE, D'ASPIRINE, ET DE CAFEINE ATTENUANT LA DOULEUR ET LES SYMPTOMES, DE LA MIGRAINE	The invention provides a safe and economical nonprescription combination of acetaminophen, aspirin and caffeine (APAP/ASA/CAF)for use in treating migraine pain and the cluster of symptoms characteristic of migraine attack, such as nausea, photophobia, phonophobiaand functional disabilities. In accordance with the present invention, the use of the APAP/ASA/CAF combination is also effective in abor…	1998-06-25	CA2296492A	US199752426P | US199821284A | WO1998US13328A	1997-07-14 | 1998-02-10 | 1998-06-25	2008-11-18	NOVARTIS AG,BASEL,CH	CA2296492C | AR16337A1 | AT240105T | AU199881705A | CA2296492A1 | DE69814636D1 | DE69814636T2 | DK994714T3 | EP994714A1 | EP994714B1 | ES2198725T3 | MY121730A | PT994714E | TW565447B | US5972916A | WO1999003475A1 | ZA199806219A	WO1999003475A1 | AU199881705A | US5972916A | ZA199806219A | EP994714A1 | EP994714B1 | DE69814636D1 | ES2198725T3 | TW565447B | CA2296492C | MY121730A	Method for treating migraine pain and cluster of symptoms characteristic of migraine attack comprises administration of composition comprising acetaminophen, aspirin and caffeine	19990128CA2296492A1	2002-07-17 EEER EXAMINATION REQUEST +					11	79	, | CA2296492A,1998-06-25
	CA2431606A1	NSAID FORMULATIONS COMPRISING LECITHIN OILS FOR PROTECTING THE GASTROINTESTINAL TRACT AND PROVIDING ENHANCED THERAPEUTIC ACTIVITY | PROCEDE ET COMPOSITIONS FAISANT APPEL A DES FORMULATIONS D'HUILES DE LECITHINE ET D'ANTI-INFLAMMATOIRES NON STEROIDES, POUR LA PROTECTION DU TRACTUS GASTRO-INTESTINAL ET L'AMELIORATION DE L'EFFET THERAPEUTIQUE | METHOD AND COMPOSITIONS EMPLOYING FORMULATIONS OF LECIT…	A novel pharmaceutical composition is provided by which nonsteroidal antiinflammatory drugs (NSAIDs) are added directly to phospholipid-containing oil such as lecithin oils or to a bio-compatible oil to which an phospholipid has been added to make a NSAID-containing formulation that possess low gastrointestinal (GI) toxicity and enhanced therapeutic activity to treat or prevent inflammation, pain…	2001-12-19	CA2431606A	US2000256711P | WO2001US51605A	2000-12-19 | 2001-12-19	2002-10-31	THE BOARD OF REGENTS OF THE UNIVERSITY OF TEXAS SYSTEM,AUSTIN,TX,US	CA2431606A1 | AT414542T | AU2001297778B2 | AU2001297778C1 | BR200116380A | CA2431606C | CN102258457A | CN1543358A | DE60136647D1 | DK1343529T3 | EP1343529A2 | EP1343529B1 | ES2317873T3 | IL156361A | IL156361D0 | JP04958381B2 | JP2005506303A | JP2010031044A | KR2003072565A | KR884493B1 | MX2003005550A | PT1343529E | SI1343529T1 | US20040077604A1 | US20100173876A1 | US20110034568A1 | US20110065677A…			20021031CA2431606A1	2006-12-04 EEER EXAMINATION REQUEST +							CA2431606A,2001-12-19
	CA2431606C	METHOD AND COMPOSITIONS EMPLOYING FORMULATIONS OF LECITHIN OILS AND NSAIDS FOR PROTECTING THE GASTROINTESTINAL TRACT AND PROVIDING ENHANCED THERAPEUTIC ACTIVITY | METHODE ET COMPOSITIONS COMPRENANT DES FORMULATIONS QUI CONTIENNENT DES HUILES DE LECITHINE ET DES AINS POUR PROTEGER LE TRACTUS GASTRO-INTESTINAL ET POUR FOURNIR UNE ACTIVITE THERAPEUTIQUE AMELIOREE	A novel pharmaceutical composition is provided by which nonsteroidal antiinflammatory drugs (NSAIDs) are added directly to phospholipid-containing oil such as lecithin oils or to a bio-compatible oil to which an phospholipid has been added to make a NSAID-containing formulation that possess low gastrointestinal (GI) toxicity and enhanced therapeutic activity to treat or prevent inflammation, pain…	2001-12-19	CA2431606A	US2000256711P | WO2001US51605A	2000-12-19 | 2001-12-19	2011-07-19	THE BOARD OF REGENTS OF THE UNIVERSITY OF TEXAS SYSTEM,AUSTIN,TX,US	CA2431606C | AT414542T | AU2001297778B2 | AU2001297778C1 | BR200116380A | CA2431606A1 | CN102258457A | CN1543358A | DE60136647D1 | DK1343529T3 | EP1343529A2 | EP1343529B1 | ES2317873T3 | IL156361A | IL156361D0 | JP04958381B2 | JP2005506303A | JP2010031044A | KR2003072565A | KR884493B1 | MX2003005550A | PT1343529E | SI1343529T1 | US20040077604A1 | US20100173876A1 | US20110034568A1 | US20110065677A…	WO2002085414A2 | EP1343529A2 | KR2003072565A | US20040077604A1 | AU2001297778A1 | MX2003005550A | CN1543358A | JP2005506303A | BR200116380A | IN200300739P2 | AU2001297778B2 | EP1343529B1 | DE60136647D1 | KR884493B1 | ES2317873T3 | IN221578B | JP2010031044A | TWI318885B | US20110034568A1 | MX282347B | US20110065677A1 | US20110071118A1 | IL156361A | CA2431606C | CN102258457A | WO2002085414A3 | JP04…	Compositions, useful for treating, e.g. tissue ulceration, pain, fever, cardiovascular disease, ovarian or colon cancer or Alzheimer's disease, comprises lecithin oil and non-steroidal antiinflammatory drug	20021031CA2431606A1	2006-12-04 EEER EXAMINATION REQUEST +					31	98	, | CA2431606A,2001-12-19
	US20040077604A1	Method and compositions employing formulations of lecithin oils and nsaids for protecting the gastrointestinal tract and providingenhanced therapeutic activity	A novel pharmaceutical composition is provided by which nonsteroidal anti-inflammatory drugs (NSAIDs) are added directly to phospholipid-containing oil such as lecithin oils or to a bio-compatible oil to which an phospholipid has been added to make a NSAID-containing formulation that possess low gastrointestinal (GI) toxicity and enhanced therapeutic activity to treat or prevent inflammation, pai…	2003-11-06	US2003433454A	WO2001US51605A	2001-12-19	2004-04-22		US20040077604A1 | AT414542T | AU2001297778B2 | AU2001297778C1 | BR200116380A | CA2431606A1 | CA2431606C | CN102258457A | CN1543358A | DE60136647D1 | DK1343529T3 | EP1343529A2 | EP1343529B1 | ES2317873T3 | IL156361A | IL156361D0 | JP04958381B2 | JP2005506303A | JP2010031044A | KR2003072565A | KR884493B1 | MX2003005550A | PT1343529E | SI1343529T1 | US20100173876A1 | US20110034568A1 | US20110065677A…	WO2002085414A2 | EP1343529A2 | KR2003072565A | US20040077604A1 | AU2001297778A1 | MX2003005550A | CN1543358A | JP2005506303A | BR200116380A | IN200300739P2 | AU2001297778B2 | EP1343529B1 | DE60136647D1 | KR884493B1 | ES2317873T3 | IN221578B | JP2010031044A | TWI318885B | US20110034568A1 | MX282347B | US20110065677A1 | US20110071118A1 | IL156361A | CA2431606C | CN102258457A | WO2002085414A3 | JP04…	Compositions, useful for treating, e.g. tissue ulceration, pain, fever, cardiovascular disease, ovarian or colon cancer or Alzheimer's disease, comprises lecithin oil and non-steroidal antiinflammatory drug	20021031CA2431606A1	2007-02-14 AS ASSIGNMENT THE BOARD OF REGENTS OF THE UNIVERSITY OF TEXAS SY ASSIGNMENT OF ASSIGNORS INTEREST;ASSIGNOR:LICHTENBERGER, LENARD M.;REEL/FRAME:018888/0111 2006-10-17	THE BOARD OF REGENTS OF THE UNIVERSITY OF TEXAS SYSTEM,AUSTIN,TX,US THE BOARD OF REGENTS OF THE UNIVERSITY OF TEXAS SYSTEM|201 W. 7TH STREET SUITE 820 AUSTIN TEXAS 78701 THE BOARD OF REGENTS OF THE UNIVERSITY OF TEXAS SYSTEM LICHTENBERGER, LENARD M. 2006-10-17 2006 018888/0111 2007-02-14 2007 ASSIGNMENT OF ASSIGNORS INTEREST (SEE DOCUMENT FOR DETAILS). T. LING CHWANG 901 MAIN STREET SUITE 6000 DA…				31	98
	US20100173876A1	OIL-BASED NSAID COMPOSITIONS AND METHODS FOR MAKING AND USING SAME	A novel pharmaceutical composition is provided by which nonsteroidal anti-inflammatory drugs (NSAIDs) are added directly to phospholipid-containing oil such as lecithin oils or to a bio-compatible oil to which an phospholipid has been added to make a NSAID-containing formulation that possess low gastrointestinal (GI) toxicity and enhanced therapeutic activity to treat or prevent inflammation, pai…	2009-07-30	US2009512610A	US2000256711P | WO2001US51605A | US2003433454A | US2008137418P	2000-12-19 | 2001-12-19 | 2003-11-06 | 2008-07-30	2010-07-08	The Board of Regents of the University of Texas System,Austin,TX,US	US20100173876A1 | AT414542T | AU2001297778B2 | AU2001297778C1 | BR200116380A | CA2431606A1 | CA2431606C | CN102258457A | CN1543358A | DE60136647D1 | DK1343529T3 | EP1343529A2 | EP1343529B1 | ES2317873T3 | IL156361A | IL156361D0 | JP04958381B2 | JP2005506303A | JP2010031044A | KR2003072565A | KR884493B1 | MX2003005550A | PT1343529E | SI1343529T1 | US20040077604A1 | US20110034568A1 | US20110065677A…	US20100173876A1	Non-aqueous oil-based composition used for, e.g. treating eye inflammation due to uveitis, comprises non-steroidal antiinflammatory drug, and non-aqueous oil-based carrier comprising bio-compatible oil and phospholipid	20021031CA2431606A1	2010-12-09 AS ASSIGNMENT US ARMY, SECRETARY OF THE ARMY, MARYLAND CONFIRMATORY LICENSE;ASSIGNOR:UNIVERSITY OF TEXAS HEALTH SCIENCE CENTER HOUSTON;REEL/FRAME:025454/0292 2010-10-18 | 2010-02-17 AS ASSIGNMENT THE BOARD OF REGENTS OF THE UNIVERSITY OF TEXAS SY ASSIGNMENT OF ASSIGNORS INTEREST;ASSIGNORS:LICHTENBERGER, LENARD M.;TIAN, SHIQIANG;SIGNING DATES FROM 20090810 TO 20091005;REEL/FRAME:023944/…	US ARMY SECRETARY OF THE ARMY,FORT DETRICK,MD,US US ARMY SECRETARY OF THE ARMY|504 SCOTT STREET USAMRMC MCMR-JA W81XWH-05-1-0118 FORT DETRICK MARYLAND 21701-5012 US ARMY, SECRETARY OF THE ARMY UNIVERSITY OF TEXAS HEALTH SCIENCE CENTER HOUSTON 2010-10-18 2010 025454/0292 2010-12-09 2010 CONFIRMATORY LICENSE (SEE DOCUMENT FOR DETAILS). US ARMY, SECRETARY OF THE ARMY 504 SCOTT STREET USAMRMC MCMR-JA…				1	1	US2000256711P,2000-12-19 | US2008137418P,2008-07-30 | US2003433454A,2003-11-06 | WO2001US51605A,2001-12-19
	US20110034568A1	Compositions comprising lecithin oils and NSAIDS for protecting the gastrointestinal tract and providing enhanced therapeutic activity	A novel pharmaceutical composition is provided by which nonsteroidal anti-inflammatory drugs (NSAIDs) are added directly to phospholipid-containing oil such as lecithin oils or to a bio-compatible oil to which an phospholipid has been added to make a NSAID-containing formulation that possess low gastrointestinal (GI) toxicity and enhanced therapeutic activity to treat or prevent inflammation, pai…	2010-09-16	US2010883873A	US2000256711P | WO2001US51605A | US2003433454A	2000-12-19 | 2001-12-19 | 2003-11-06	2011-02-10	The Board of Regents of the University of Texas System,Austin,TX,US	US20110034568A1 | AT414542T | AU2001297778B2 | AU2001297778C1 | BR200116380A | CA2431606A1 | CA2431606C | CN102258457A | CN1543358A | DE60136647D1 | DK1343529T3 | EP1343529A2 | EP1343529B1 | ES2317873T3 | IL156361A | IL156361D0 | JP04958381B2 | JP2005506303A | JP2010031044A | KR2003072565A | KR884493B1 | MX2003005550A | PT1343529E | SI1343529T1 | US20040077604A1 | US20100173876A1 | US20110065677A…	WO2002085414A2 | EP1343529A2 | KR2003072565A | US20040077604A1 | AU2001297778A1 | MX2003005550A | CN1543358A | JP2005506303A | BR200116380A | IN200300739P2 | AU2001297778B2 | EP1343529B1 | DE60136647D1 | KR884493B1 | ES2317873T3 | IN221578B | JP2010031044A | TWI318885B | US20110034568A1 | MX282347B | US20110065677A1 | US20110071118A1 | IL156361A | CA2431606C | CN102258457A | WO2002085414A3 | JP04…	Compositions, useful for treating, e.g. tissue ulceration, pain, fever, cardiovascular disease, ovarian or colon cancer or Alzheimer's disease, comprises lecithin oil and non-steroidal antiinflammatory drug	20021031CA2431606A1	2010-11-03 AS ASSIGNMENT THE BOARD OF REGENTS OF THE UNIVERISTY OF TEXAS SY ASSIGNMENT OF ASSIGNORS INTEREST;ASSIGNOR:LICHTENBERGER, LENARD M;REEL/FRAME:025242/0333 2006-10-17	THE BOARD OF REGENTS OF THE UNIVERSITY OF TEXAS SYSTEM,AUSTIN,TX,US THE BOARD OF REGENTS OF THE UNIVERSITY OF TEXAS SYSTEM|201 W. 7TH STREET SUITE 820 AUSTIN TEXAS 78701 THE BOARD OF REGENTS OF THE UNIVERSITY OF TEXAS SYSTEM LICHTENBERGER, LENARD M. 2006-10-17 2006 031645/0863 2013-11-15 2013 CORRECTIVE ASSIGNMENT TO CORRECT THE ATTORNEY DOCKET NUMBER AND ASSIGNEES NAME PREVIOUSLY RECORDED ON REE…				31	98	US2000256711P,2000-12-19 | US2003433454A,2003-11-06 | WO2001US51605A,2001-12-19
	US20110065677A1	Methods of Treating Inflammation with Compositions Comprising Lecithin Oils and NSAIDS for Protecting the Gastrointestinal Tract and Providing Enhanced Therapeutic Activity	A novel pharmaceutical composition is provided by which nonsteroidal anti-inflammatory drugs (NSAIDs) are added directly to phospholipid-containing oil such as lecithin oils or to a bio-compatible oil to which an phospholipid has been added to make a NSAID-containing formulation that possess low gastrointestinal (GI) toxicity and enhanced therapeutic activity to treat or prevent inflammation, pai…	2010-09-16	US2010883902A	US2000256711P | WO2001US51605A | US2003433454A	2000-12-19 | 2001-12-19 | 2003-11-06	2011-03-17	The Board of Regents of the University of Texas System,Austin,TX,US	US20110065677A1 | AT414542T | AU2001297778B2 | AU2001297778C1 | BR200116380A | CA2431606A1 | CA2431606C | CN102258457A | CN1543358A | DE60136647D1 | DK1343529T3 | EP1343529A2 | EP1343529B1 | ES2317873T3 | IL156361A | IL156361D0 | JP04958381B2 | JP2005506303A | JP2010031044A | KR2003072565A | KR884493B1 | MX2003005550A | PT1343529E | SI1343529T1 | US20040077604A1 | US20100173876A1 | US20110034568A…	WO2002085414A2 | EP1343529A2 | KR2003072565A | US20040077604A1 | AU2001297778A1 | MX2003005550A | CN1543358A | JP2005506303A | BR200116380A | IN200300739P2 | AU2001297778B2 | EP1343529B1 | DE60136647D1 | KR884493B1 | ES2317873T3 | IN221578B | JP2010031044A | TWI318885B | US20110034568A1 | MX282347B | US20110065677A1 | US20110071118A1 | IL156361A | CA2431606C | CN102258457A | WO2002085414A3 | JP04…	Compositions, useful for treating, e.g. tissue ulceration, pain, fever, cardiovascular disease, ovarian or colon cancer or Alzheimer's disease, comprises lecithin oil and non-steroidal antiinflammatory drug	20021031CA2431606A1	2010-11-03 AS ASSIGNMENT THE BOARD OF REGENTS OF THE UNIVERISTY OF TEXAS SY ASSIGNMENT OF ASSIGNORS INTEREST;ASSIGNOR:LICHTENBERGER, LENARD M;REEL/FRAME:025242/0333 2006-10-17	THE BOARD OF REGENTS OF THE UNIVERSITY OF TEXAS SYSTEM,AUSTIN,TX,US THE BOARD OF REGENTS OF THE UNIVERSITY OF TEXAS SYSTEM|201 W. 7TH STREET SUITE 820 AUSTIN TEXAS 78701 THE BOARD OF REGENTS OF THE UNIVERSITY OF TEXAS SYSTEM LICHTENBERGER, LENARD M. 2006-10-17 2006 031645/0863 2013-11-15 2013 CORRECTIVE ASSIGNMENT TO CORRECT THE ATTORNEY DOCKET NUMBER AND ASSIGNEES NAME PREVIOUSLY RECORDED ON REE…				31	98	US2000256711P,2000-12-19 | US2003433454A,2003-11-06 | WO2001US51605A,2001-12-19
	US20110071118A1	Methods of Making Compositions Comprising Lecithin Oils and NSAIDS for Protecting the Gastointestinal Tract and Providing Enhanced Therapeuitc Activity	A novel pharmaceutical composition is provided by which nonsteroidal anti-inflammatory drugs (NSAIDs) are added directly to phospholipid-containing oil such as lecithin oils or to a bio-compatible oil to which an phospholipid has been added to make a NSAID-containing formulation that possess low gastrointestinal (GI) toxicity and enhanced therapeutic activity to treat or prevent inflammation, pai…	2010-09-16	US2010883918A	US2000256711P | WO2001US51605A | US2003433454A	2000-12-19 | 2001-12-19 | 2003-11-06	2011-03-24	The Board of Regents of the University of Texas System,Austin,TX,US	US20110071118A1 | AT414542T | AU2001297778B2 | AU2001297778C1 | BR200116380A | CA2431606A1 | CA2431606C | CN102258457A | CN1543358A | DE60136647D1 | DK1343529T3 | EP1343529A2 | EP1343529B1 | ES2317873T3 | IL156361A | IL156361D0 | JP04958381B2 | JP2005506303A | JP2010031044A | KR2003072565A | KR884493B1 | MX2003005550A | PT1343529E | SI1343529T1 | US20040077604A1 | US20100173876A1 | US20110034568A…	WO2002085414A2 | EP1343529A2 | KR2003072565A | US20040077604A1 | AU2001297778A1 | MX2003005550A | CN1543358A | JP2005506303A | BR200116380A | IN200300739P2 | AU2001297778B2 | EP1343529B1 | DE60136647D1 | KR884493B1 | ES2317873T3 | IN221578B | JP2010031044A | TWI318885B | US20110034568A1 | MX282347B | US20110065677A1 | US20110071118A1 | IL156361A | CA2431606C | CN102258457A | WO2002085414A3 | JP04…	Compositions, useful for treating, e.g. tissue ulceration, pain, fever, cardiovascular disease, ovarian or colon cancer or Alzheimer's disease, comprises lecithin oil and non-steroidal antiinflammatory drug	20021031CA2431606A1	2013-04-15 AS ASSIGNMENT THE BOARD OF REGENTS OF THE UNIVERSITY OF TEXAS SY CORRECTIVE ASSIGNMENT TO CORRECT THE ASSIGNEE'S NAME PREVIOUSLY RECORDED ON REEL 025242 FRAME 0333. ASSIGNOR(S) HEREBY CONFIRMS THE ASSIGNEE'S NAME SHOULD APPEAR AS: THE BOARD OF REGENTS OF THE UNIVERSITY OF TEXAS SYSTEM;ASSIGNOR:LICHTENBERGER, LENARD M;REEL/FRAME:030219/0314 2006-10-17 | 2010-11-03 AS ASSIGNMENT THE BOAR…	THE BOARD OF REGENTS OF THE UNIVERSITY OF TEXAS SYSTEM,AUSTIN,TX,US THE BOARD OF REGENTS OF THE UNIVERSITY OF TEXAS SYSTEM|201 W. 7TH STREET SUITE 820 AUSTIN TEXAS 78701 THE BOARD OF REGENTS OF THE UNIVERSITY OF TEXAS SYSTEM LICHTENBERGER, LENARD M. 2006-10-17 2006 031645/0863 2013-11-15 2013 CORRECTIVE ASSIGNMENT TO CORRECT THE ATTORNEY DOCKET NUMBER AND ASSIGNEES NAME PREVIOUSLY RECORDED ON REE…				31	98	US2000256711P,2000-12-19 | US2003433454A,2003-11-06 | WO2001US51605A,2001-12-19
	US20150011507A1	COMPOSITIONS COMPRISING LECITHIN OILS AND NSAIDS FOR PROTECTING THE GASTROINTESTINAL TRACT AND PROVIDING ENHANCED THERAPEUTIC ACTIVITY	A novel pharmaceutical composition is provided by which nonsteroidal anti-inflammatory drugs (NSAIDs) are added directly to phospholipid-containing oil such as lecithin oils or to a bio-compatible oil to which an phospholipid has been added to make a NSAID-containing formulation that possess low gastrointestinal (GI) toxicity and enhanced therapeutic activity to treat or prevent inflammation, pai…	2014-09-24	US14495525A	US2000256711P | WO2001US51605A | US2003433454A | US2010883873A	2000-12-19 | 2001-12-19 | 2003-11-06 | 2010-09-16	2015-01-08	The Board of Regents of the University of Texas System,Austin,TX,US | The Board of Regents of the University of Texas System,Austin,TX,US	US20150011507A1 | AT414542T | AU2001297778B2 | AU2001297778C1 | BR200116380A | CA2431606A1 | CA2431606C | CN102258457A | CN1543358A | DE60136647D1 | DK1343529T3 | EP1343529A2 | EP1343529B1 | ES2317873T3 | IL156361A | IL156361D0 | JP04958381B2 | JP2005506303A | JP2010031044A | KR2003072565A | KR884493B1 | MX2003005550A | PT1343529E | SI1343529T1 | US20040077604A1 | US20100173876A1 | US20110034568A…	WO2002085414A2 | EP1343529A2 | KR2003072565A | US20040077604A1 | AU2001297778A1 | MX2003005550A | CN1543358A | JP2005506303A | BR200116380A | IN200300739P2 | AU2001297778B2 | EP1343529B1 | DE60136647D1 | KR884493B1 | ES2317873T3 | IN221578B | JP2010031044A | TWI318885B | US20110034568A1 | MX282347B | US20110065677A1 | US20110071118A1 | IL156361A | CA2431606C | CN102258457A | WO2002085414A3 | JP04…	Compositions, useful for treating, e.g. tissue ulceration, pain, fever, cardiovascular disease, ovarian or colon cancer or Alzheimer's disease, comprises lecithin oil and non-steroidal antiinflammatory drug	20021031CA2431606A1						31	98	US2000256711P,2000-12-19 | US2010883873A,2010-09-16 | US2003433454A,2003-11-06
	US2890240A	Aspirin crystallisation		1957-03-26	US1957648518A	GBX2890240A	1956-03-28	1959-06-09	MONSANTO CHEMICALS	US2890240A			19590609US2890240A_
	US3235583A	Preparation of aspirin		1964-07-22	US1964384544A	US1964384544A	1964-07-22	1966-02-15	NORWICH PHARMA CO	US3235583A	GB896715A | CH381246A | DE1155140A1 | JP67002580B | US3235583A	Acetylsalicylic acid	19660215US3235583A_	1982-06-28 AS ASSIGNMENT NORWICH EATON PHARMACEUTICALS, INC., 17 EATON AVE. ASSIGNMENT OF ASSIGNORS INTEREST.;ASSIGNOR:MORTON-NORWICH PRODUCTS, INC., A CORP. OF DE;REEL/FRAME:004085/0126 1982-06-09	NORWICH EATON PHARMACEUTICALS INC. A CORP. OF OH,NORWICH,NY,US NORWICH EATON PHARMACEUTICALS INC. A CORP. OF OH|17 EATON AVE. NORWICH NEW YORK NORWICH EATON PHARMACEUTICALS, INC., A CORP. OF OH MORTON-NORWICH PRODUCTS, INC., A CORP. OF DE 1982-06-09 1982 004085/0126 1982-06-28 1982 ASSIGNMENT OF ASSIGNORS INTEREST. NORWICH EATON PHARMACEUTICALS, INC. 17 EATON AVE., NORWICH, NY 13815				5	5
	US5972916A	Compositions containing the nonprescription combination of acetaminophen, aspirin and caffeine to alleviate the pain and symptoms of migraine	The invention provides a safe and economical nonprescription combination of acetaminophen, aspirin and caffeine (APAP/ASA/CAF) for use in treating migraine pain and the cluster of symptoms characteristic of migraine attack, such as nausea, photophobia, phonophobia and functional disabilities. The use of the APAP/ASA/CAF combination is also effective in aborting the prodrome phase of a migraine at…	1998-02-10	US199821284A	US199752426P	1997-07-14	1999-10-26	Bristol Myers Squibb Company,New York,NY,US	US5972916A | AR16337A1 | AT240105T | AU199881705A | CA2296492A1 | CA2296492C | DE69814636D1 | DE69814636T2 | DK994714T3 | EP994714A1 | EP994714B1 | ES2198725T3 | MY121730A | PT994714E | TW565447B | WO1999003475A1 | ZA199806219A	WO1999003475A1 | AU199881705A | US5972916A | ZA199806219A | EP994714A1 | EP994714B1 | DE69814636D1 | ES2198725T3 | TW565447B | CA2296492C | MY121730A	Method for treating migraine pain and cluster of symptoms characteristic of migraine attack comprises administration of composition comprising acetaminophen, aspirin and caffeine	19990128CA2296492A1	2011-03-30 FPAY FEE PAYMENT + | 2007-03-30 FPAY FEE PAYMENT + | 2005-10-21 AS ASSIGNMENT NOVARTIS AG, SWITZERLAND ASSIGNMENT OF ASSIGNORS INTEREST;ASSIGNOR:BRISTOL-MYERS SQUIBB COMPANY;REEL/FRAME:017115/0506 2005-08-24 | 2003-03-31 FPAY FEE PAYMENT + | 1998-02-10 AS ASSIGNMENT BRISTOL-MYERS SQUIBB COMPANY, NEW YORK ASSIGNMENT OF ASSIGNORS INTEREST;ASSIGNORS:ARMELLINO, JOSEPH;KOSLO, RANDY;REEL/FRA…	NOVARTIS AG,BASEL,CH NOVARTIS AG|LICHTSTRASSE 35 BASEL SWITZERLAND 4056 NOVARTIS AG BRISTOL-MYERS SQUIBB COMPANY 2005-08-24 2005 017115/0506 2005-10-21 2005 ASSIGNMENT OF ASSIGNORS INTEREST (SEE DOCUMENT FOR DETAILS). NOVARTIS CORPORATE INTELLECTUAL PROPERTY ONE HEALTH PLAZA BUILDING 104 EAST HANOVER, NJ 07936-1080 | BRISTOL-MYERS SQUIBB COMPANY,NEW YORK,NY,US BRISTOL-MYERS SQUIBB COMPANY|345 PAR…				11	79
	US6015577A	Pharmaceutical compositions containing dipyridamole or mopidamol and acetylsalicylic acid or the physiologically acceptable salts thereof, processes for preparing them and their use in treating clot formation	The specification describes a pharmaceutical combination consisting of dipyridamole or mopidamol and acetylsalicylic acid or the physiologically acceptable salts thereof, processes for preparing this pharmaceutical combination and the use thereof for the controlled prevention of clot formation.	1995-04-12	US1995421351A	DE3627423A | US198784648A | US1988240981A | US1989423108A | US1990584393A | US1991750345A | US1992879258A | US19933909A | US1994261789A	1986-08-13 | 1987-08-12 | 1988-09-06 | 1989-10-18 | 1990-09-18 | 1991-08-27 | 1992-05-06 | 1993-01-13 | 1994-06-20	2000-01-18	Thomae GmbH Dr. Karl,Biberach an der Riss,DE	US6015577A | AT59961T | AU198776795A | AU603146B2 | CA1302272C | CL2004001252A1 | DD263918A5 | DE10299015I1 | DE10299015I2 | DE3627423A1 | DE3767408D1 | DK172236B1 | DK198704211A | DK198704211D0 | EP257344A1 | EP257344B1 | FI198703492A0 | FI198703492A | FI873492A0 | GR3001695T3 | HK1994144A | HU202404B | HU44937T | IE19872152L | IE60862B1 | IL83510A | IL83510D0 | JP02593879B2 | JP63048219A | KR19…	DE3627423A1 | EP257344A1 | JP63048219A | AU198776795A | NO198703370A | FI198703492A | DK198704211A | HU44937T | PT85525A | ZA198705947A | DD263918A | EP257344B1 | DE3767408D1 | ES2020974B | IL83510A | CA1302272C | NO175132B | PH27176A | JP02593879B2 | DK172236B | BR1100593A3 | KR199509098B1 | US6015577A	Antithrombotics, platelet aggregation inhibitors contg. combination of dipyridamole or mopidamol and O-acetyl-acid salicylic	19870812DK198704211D0	2011-07-12 FPAY FEE PAYMENT + | 2009-09-08 CC CERTIFICATE OF CORRECTION | 2009-07-10 AS ASSIGNMENT BOEHRINGER INGELHEIM PHARMA GMBH & CO. KG, GERMANY ASSIGNMENT OF ASSIGNORS INTEREST;ASSIGNOR:WEISENBERGER, HANS;REEL/FRAME:022939/0216 2009-02-17 | 2009-07-10 AS ASSIGNMENT BOEHRINGER INGELHEIM PHARMA KG, GERMANY NUNC PRO TUNC ASSIGNMENT;ASSIGNOR:THOMAE, KARL, DR.;REEL/FRAME:022939/0287 2009-03-30 |…	BOEHRINGER INGELHEIM PHARMA KG,INGELHEIM,DE BOEHRINGER INGELHEIM PHARMA KG|POSTFACH 200 INGELHEIM GERMANY D55216 BOEHRINGER INGELHEIM PHARMA KG THOMAE, KARL, DR. 2009-03-30 2009 022939/0287 2009-07-10 2009 NUNC PRO TUNC ASSIGNMENT (SEE DOCUMENT FOR DETAILS). TIMOTHY X. GIBSON GIBSON & DERNIER LLP 900 ROUTE 9 NORTH WOODBRIDGE, NJ 07095 | BOEHRINGER INGELHEIM PHARMA GMBH & CO. KG,INGELHEIM AM RHEIN…	CC			23	28	US1994261789A,1994-06-20 | US19933909A,1993-01-13 | US198784648A,1987-08-12 | US1988240981A,1988-09-06 | US1989423108A,1989-10-18 | US1990584393A,1990-09-18 | US1991750345A,1991-08-27 | US1992879258A,1992-05-06
	US8865187B2	Compositions comprising lecithin oils and NSAIDs for protecting the gastrointestinal tract and providing enhanced therapeutic activity	A novel pharmaceutical composition is provided by which nonsteroidal anti-inflammatory drugs (NSAIDs) are added directly to phospholipid-containing oil such as lecithin oils or to a bio-compatible oil to which an phospholipid has been added to make a NSAID-containing formulation that possess low gastrointestinal (GI) toxicity and enhanced therapeutic activity to treat or prevent inflammation, pai…	2010-09-16	US2010883873A	US2000256711P | WO2001US51605A | US2003433454A	2000-12-19 | 2001-12-19 | 2003-11-06	2014-10-21	The Board of Regents of the University of Texas System,Austin,TX,US | Lichtenberger Lenard M.,Houston,TX,US	US8865187B2 | AT414542T | AU2001297778B2 | AU2001297778C1 | BR200116380A | CA2431606A1 | CA2431606C | CN102258457A | CN1543358A | DE60136647D1 | DK1343529T3 | EP1343529A2 | EP1343529B1 | ES2317873T3 | IL156361A | IL156361D0 | JP04958381B2 | JP2005506303A | JP2010031044A | KR2003072565A | KR884493B1 | MX2003005550A | PT1343529E | SI1343529T1 | US20040077604A1 | US20100173876A1 | US20110034568A1 | …	WO2002085414A2 | EP1343529A2 | KR2003072565A | US20040077604A1 | AU2001297778A1 | MX2003005550A | CN1543358A | JP2005506303A | BR200116380A | IN200300739P2 | AU2001297778B2 | EP1343529B1 | DE60136647D1 | KR884493B1 | ES2317873T3 | IN221578B | JP2010031044A | TWI318885B | US20110034568A1 | MX282347B | US20110065677A1 | US20110071118A1 | IL156361A | CA2431606C | CN102258457A | WO2002085414A3 | JP04…	Compositions, useful for treating, e.g. tissue ulceration, pain, fever, cardiovascular disease, ovarian or colon cancer or Alzheimer's disease, comprises lecithin oil and non-steroidal antiinflammatory drug	20021031CA2431606A1	2010-11-03 AS ASSIGNMENT THE BOARD OF REGENTS OF THE UNIVERISTY OF TEXAS SY ASSIGNMENT OF ASSIGNORS INTEREST;ASSIGNOR:LICHTENBERGER, LENARD M;REEL/FRAME:025242/0333 2006-10-17	THE BOARD OF REGENTS OF THE UNIVERSITY OF TEXAS SYSTEM,AUSTIN,TX,US THE BOARD OF REGENTS OF THE UNIVERSITY OF TEXAS SYSTEM|201 W. 7TH STREET SUITE 820 AUSTIN TEXAS 78701 THE BOARD OF REGENTS OF THE UNIVERSITY OF TEXAS SYSTEM LICHTENBERGER, LENARD M. 2006-10-17 2006 031645/0863 2013-11-15 2013 CORRECTIVE ASSIGNMENT TO CORRECT THE ATTORNEY DOCKET NUMBER AND ASSIGNEES NAME PREVIOUSLY RECORDED ON REE…				31	98	US2000256711P,2000-12-19 | US2010883873A,2010-09-16 | US2003433454A,2003-11-06
	US8911752B2	Methods of making compositions comprising lecithin oils and NSAIDS for protecting the gastrointestinal tract and providing enhanced therapeutic activity	A novel pharmaceutical composition is provided by which nonsteroidal anti-inflammatory drugs (NSAIDs) are added directly to phospholipid-containing oil such as lecithin oils or to a bio-compatible oil to which an phospholipid has been added to make a NSAID-containing formulation that possess low gastrointestinal (GI) toxicity and enhanced therapeutic activity to treat or prevent inflammation, pai…	2010-09-16	US2010883918A	US2000256711P | WO2001US51605A | US2003433454A	2000-12-19 | 2001-12-19 | 2003-11-06	2014-12-16	The Board of Regents of the University of Texas System,Austin,TX,US | Lichtenberger Lenard M.,Houston,TX,US	US8911752B2 | AT414542T | AU2001297778B2 | AU2001297778C1 | BR200116380A | CA2431606A1 | CA2431606C | CN102258457A | CN1543358A | DE60136647D1 | DK1343529T3 | EP1343529A2 | EP1343529B1 | ES2317873T3 | IL156361A | IL156361D0 | JP04958381B2 | JP2005506303A | JP2010031044A | KR2003072565A | KR884493B1 | MX2003005550A | PT1343529E | SI1343529T1 | US20040077604A1 | US20100173876A1 | US20110034568A1 | …	WO2002085414A2 | EP1343529A2 | KR2003072565A | US20040077604A1 | AU2001297778A1 | MX2003005550A | CN1543358A | JP2005506303A | BR200116380A | IN200300739P2 | AU2001297778B2 | EP1343529B1 | DE60136647D1 | KR884493B1 | ES2317873T3 | IN221578B | JP2010031044A | TWI318885B | US20110034568A1 | MX282347B | US20110065677A1 | US20110071118A1 | IL156361A | CA2431606C | CN102258457A | WO2002085414A3 | JP04…	Compositions, useful for treating, e.g. tissue ulceration, pain, fever, cardiovascular disease, ovarian or colon cancer or Alzheimer's disease, comprises lecithin oil and non-steroidal antiinflammatory drug	20021031CA2431606A1	2013-04-15 AS ASSIGNMENT THE BOARD OF REGENTS OF THE UNIVERSITY OF TEXAS SY CORRECTIVE ASSIGNMENT TO CORRECT THE ASSIGNEE'S NAME PREVIOUSLY RECORDED ON REEL 025242 FRAME 0333. ASSIGNOR(S) HEREBY CONFIRMS THE ASSIGNEE'S NAME SHOULD APPEAR AS: THE BOARD OF REGENTS OF THE UNIVERSITY OF TEXAS SYSTEM;ASSIGNOR:LICHTENBERGER, LENARD M;REEL/FRAME:030219/0314 2006-10-17 | 2010-11-03 AS ASSIGNMENT THE BOAR…	THE BOARD OF REGENTS OF THE UNIVERSITY OF TEXAS SYSTEM,AUSTIN,TX,US THE BOARD OF REGENTS OF THE UNIVERSITY OF TEXAS SYSTEM|201 W. 7TH STREET SUITE 820 AUSTIN TEXAS 78701 THE BOARD OF REGENTS OF THE UNIVERSITY OF TEXAS SYSTEM LICHTENBERGER, LENARD M. 2006-10-17 2006 031645/0863 2013-11-15 2013 CORRECTIVE ASSIGNMENT TO CORRECT THE ATTORNEY DOCKET NUMBER AND ASSIGNEES NAME PREVIOUSLY RECORDED ON REE…				31	98	US2010883918A,2010-09-16 | US2000256711P,2000-12-19 | US2003433454A,2003-11-06

## Sheet: amiloride
BACK TO CONTENTS
INN:	amiloride
Category:	diuretics
1. Merck Index
Merck status:	Expired
Merck year:	1967
Merck data:	Prepn: E. J. Cragoe, Jr., BE 639386; idem, US 3313813 (1964, 1967 both to Merck & Co.)
Merck patents:	BE639386, US3313813
2. Orange Book
Single formulations:	Drug	Dosage form/route	Strength(s)	Proprietary name	Brand supplier	# of generic suppliers	Patents	Data exclusivity	Drug approval date	Co-formulations available	Patented co-formulation	Notes
	amiloride (HYDROCHLORIDE)	TABLET; ORAL	5MG	MIDAMOR	PADDOCK LLC	2	None	None	Approved Prior to Jan 1, 1982	AMILORIDE HYDROCHLORIDE+HYDROCHLOROTHIAZIDE	No	Only available as AMILORIDE HYDROCHLORIDE
Single formulation patents:	None
Co formulations:	Drug	Dosage form/route	Strength(s)	Proprietary name	Brand supplier	# of generic suppliers	Patents	Data exclusivity	Drug approval date	Patent1	Patent2	Patent3
	None
OB co-forms w patents:	None
3. HC patent register
Single formulations:	INN	On patent register	Dosage form/route	Strength(s)	Proprietary name	Brand supplier	# of generic suppliers
	amiloride	No					1
Single formulation patents:	None
Co formulations:	INN	On patent register	Dosage form/route	Strength(s)	Proprietary name	Brand supplier	# of generic suppliers
	None
Co formulation patents:	None
4. Drug bank patents:	None
5. WO patents:	None
6. All patents	BE639386, US3313813
7. Global landscape by starting patent
	Thomson Innovation Patent Export, 2015-05-04 17:57:35 -0500
	Publication Number	Title	Abstract	Application Date	Application Number	Priority Number	Priority Date	Publication Date	Assignee/Applicant	INPADOC Family Members	DWPI Family Members	Title - DWPI	INPADOC Family ID	INPADOC Legal Status	Reassignment (US)	Maintenance Status (US)	Opposition (EP)	License (EP)	DWPI Count of Family Members	DWPI Count of Family Countries	Related Applications
	US3313813A	(3-amino-5, 6-disubstituted-pyrazinoyl) guanidines		1963-10-07	US1963313315A	US1962234230A	1962-10-30	1967-04-11	MERCK & CO INC	US3313813A | AT277992B | BE639386A | BE643268A | BE651729A | BE651730A | BE653477A | BE653478A | BE653479A | BE653481A | BR196354164D0 | BR196456479D0 | BR6354164D0 | CH457434A | CH457435A | CH457436A | CH457437A | CH464202A | CH464203A | CH465617A | CH466283A | CH466284A | CH466285A | CH466286A | CH466287A | CH466288A | CH466289A | CH466290A | CH469721A | CH474509A | CH474510A | CH478795A | CH47…	US3781430A | AU6336778A | CA764963A | CA765823A | CH481116A | FR1563612A | GB1066855A | IE6400445A | JP67006249B | JP67007395B | JP67014556B | JP68008470B | US3313813A | JP70002592B | DE1470053B | DE1795438B	Guanidine derivs diuretics for blood potassium conservation	19640731BE643268A_						16	9
	BE639386A			0001-01-01	BED639386A	BED639386A | US1962234230A | US1963313315A	0001-01-01 | 1962-10-30 | 1963-10-07			BE639386A | AT277992B | BE643268A | BE651729A | BE651730A | BE653477A | BE653478A | BE653479A | BE653481A | BR196354164D0 | BR196456479D0 | BR6354164D0 | CH457434A | CH457435A | CH457436A | CH457437A | CH464202A | CH464203A | CH465617A | CH466283A | CH466284A | CH466285A | CH466286A | CH466287A | CH466288A | CH466289A | CH466290A | CH469721A | CH474509A | CH474510A | CH478795A | CH478796A | CH481…			19640731BE643268A_
8. N. American extended	Expired
	Thomson Innovation Patent Export, 2015-05-06 09:56:15 -0500
	Publication Number	Title	Abstract	Application Date	Application Number	Priority Number	Priority Date	Publication Date	Assignee/Applicant	INPADOC Family Members	DWPI Family Members	Title - DWPI	INPADOC Family ID	INPADOC Legal Status	Reassignment (US)	Maintenance Status (US)	Opposition (EP)	License (EP)	DWPI Count of Family Members	DWPI Count of Family Countries	Related Applications
	CA764963A	ALKYL-3-AMINO-6-CHLOROPYRAZINOATES AND PROCESS OF PREPARATION		0001-01-01	CA764963A	CAT764963A	0001-01-01	1967-08-08	MERCK AND CO.	CA764963A	US3781430A | AU6336778A | CA764963A | CA765823A | CH481116A | FR1563612A | GB1066855A | IE6400445A | JP67006249B | JP67007395B | JP67014556B | JP68008470B | US3313813A | JP70002592B | DE1470053B | DE1795438B	Guanidine derivs diuretics for blood potassium conservation	19670808CA764963A_						16	9
	CA765823A	PYRAZINOYLGUANIDINES		0001-01-01	CA765823A	CAT765823A	0001-01-01	1967-08-22	MERCK AND CO.	CA765823A	US3781430A | AU6336778A | CA764963A | CA765823A | CH481116A | FR1563612A | GB1066855A | IE6400445A | JP67006249B | JP67007395B | JP67014556B | JP68008470B | US3313813A | JP70002592B | DE1470053B | DE1795438B	Guanidine derivs diuretics for blood potassium conservation	19670822CA765823A_						16	9
	US3781430A	DIURETIC FORMULATIONS		1971-12-01	US1971210577A	US1962234230A | US1963313315A | US1971210577A	1962-10-30 | 1963-10-07 | 1971-12-21	1973-12-25	MERCK + CO. INC.	US3781430A | AT277992B | BE639386A | BE643268A | BE651729A | BE651730A | BE653477A | BE653478A | BE653479A | BE653481A | BR196354164D0 | BR196456479D0 | BR6354164D0 | CH457434A | CH457435A | CH457436A | CH457437A | CH464202A | CH464203A | CH465617A | CH466283A | CH466284A | CH466285A | CH466286A | CH466287A | CH466288A | CH466289A | CH466290A | CH469721A | CH474509A | CH474510A | CH478795A | CH47…	US3781430A | AU6336778A | CA764963A | CA765823A | CH481116A | FR1563612A | GB1066855A | IE6400445A | JP67006249B | JP67007395B | JP67014556B | JP68008470B | US3313813A | JP70002592B | DE1470053B | DE1795438B	Guanidine derivs diuretics for blood potassium conservation	19640731BE643268A_						16	9
	US3491094A	PROCESS FOR PREPARING PYRAZINOYL- AND PYRAZINAMIDOGUANIDINES		1965-11-22	USD3491094A	US1964357256A | US1965509217A | US1965509163A	1964-04-03 | 1965-11-22 | 1965-11-22	1970-01-20	MERCK + CO. INC.	US3491094A | AT277992B | BE639386A | BE643268A | BE651729A | BE651730A | BE653477A | BE653478A | BE653479A | BE653481A | BR196354164D0 | BR196456479D0 | BR6354164D0 | CH457434A | CH457435A | CH457436A | CH457437A | CH464202A | CH464203A | CH465617A | CH466283A | CH466284A | CH466285A | CH466286A | CH466287A | CH466288A | CH466289A | CH466290A | CH469721A | CH474509A | CH474510A | CH478795A | CH47…	US3491094A	Pyrazinoyl and pyrazinamidoguanidines	19640731BE643268A_						1	1
	US3410850A	4h-pyrazino-[2, 3d][1, 3]oxazin-4-ones and their preparation | AND THEIR PREPARATION		1965-11-22	US1965509217A	US1962234230A | US1963313315A | US1964356039A | US1964356038A | US1964356042A | US1964357256A	1962-10-30 | 1963-10-07 | 1964-03-31 | 1964-03-31 | 1964-03-31 | 1964-04-03	1968-11-12	MERCK & CO INC	US3410850A | AT277992B | BE639386A | BE643268A | BE651729A | BE651730A | BE653477A | BE653478A | BE653479A | BE653481A | BR196354164D0 | BR196456479D0 | BR6354164D0 | CH457434A | CH457435A | CH457436A | CH457437A | CH464202A | CH464203A | CH465617A | CH466283A | CH466284A | CH466285A | CH466286A | CH466287A | CH466288A | CH466289A | CH466290A | CH469721A | CH474509A | CH474510A | CH478795A | CH47…	US3410850A	(A) Cpds. (I): where R is H, halogen, lower alkyl, cycloalkyl, phenyl, halogenophenyl, lower alkoxy, lower alkylthio, lower alkyl sulphonyl, phenyl-lower-a	19640731BE643268A_						1	1
	US3360517A	3-amino-6-substituted-pyrazinoyl-guanidines		1966-03-16	US1966534638A	US1962234230A | US1964356040A	1962-10-30 | 1964-03-31	1967-12-26	MERCK & CO INC	US3360517A | AT277992B | BE639386A | BE643268A | BE651729A | BE651730A | BE653477A | BE653478A | BE653479A | BE653481A | BR196354164D0 | BR196456479D0 | BR6354164D0 | CH457434A | CH457435A | CH457436A | CH457437A | CH464202A | CH464203A | CH465617A | CH466283A | CH466284A | CH466285A | CH466286A | CH466287A | CH466288A | CH466289A | CH466290A | CH469721A | CH474509A | CH474510A | CH478795A | CH47…	US3360517A	Pyrazinoylguanidine derivs diuretics	19640731BE643268A_						1	1
	US3359269A	3-amino-5-substituted-pyrazinoyl-guanidines		1966-03-16	US1966534640A	US1962234230A | US1963313315A | US1964356039A | US1964356038A | US1964356042A	1962-10-30 | 1963-10-07 | 1964-03-31 | 1964-03-31 | 1964-03-31	1967-12-19	MERCK & CO INC	US3359269A | AT277992B | BE639386A | BE643268A | BE651729A | BE651730A | BE653477A | BE653478A | BE653479A | BE653481A | BR196354164D0 | BR196456479D0 | BR6354164D0 | CH457434A | CH457435A | CH457436A | CH457437A | CH464202A | CH464203A | CH465617A | CH466283A | CH466284A | CH466285A | CH466286A | CH466287A | CH466288A | CH466289A | CH466290A | CH469721A | CH474509A | CH474510A | CH478795A | CH47…	US3359269A	3-amino-5-substituted-pyrazinoyl guanidines	19640731BE643268A_						1	1
	US3316266A	3-aminopyrazinoic acid derivatives and process for their preparation		1964-03-31	US1964356039A	US1964356039A	1964-03-31	1967-04-25	MERCK & CO INC	US3316266A | AT277992B | BE639386A | BE643268A | BE651729A | BE651730A | BE653477A | BE653478A | BE653479A | BE653481A | BR196354164D0 | BR196456479D0 | BR6354164D0 | CH457434A | CH457435A | CH457436A | CH457437A | CH464202A | CH464203A | CH465617A | CH466283A | CH466284A | CH466285A | CH466286A | CH466287A | CH466288A | CH466289A | CH466290A | CH469721A | CH474509A | CH474510A | CH478795A | CH47…	BE653478A | AU6447284A | CA765824A | DE1238478A1 | IE6400439A | NL196409713A | US3316266A | ZA196403506A | CH488710A | FR95102E	3-aminopyrazinoic acid esters neth 6 409 713 provided	19640731BE643268A_						10	10
	US3313813A	(3-amino-5, 6-disubstituted-pyrazinoyl) guanidines		1963-10-07	US1963313315A	US1962234230A	1962-10-30	1967-04-11	MERCK & CO INC	US3313813A | AT277992B | BE639386A | BE643268A | BE651729A | BE651730A | BE653477A | BE653478A | BE653479A | BE653481A | BR196354164D0 | BR196456479D0 | BR6354164D0 | CH457434A | CH457435A | CH457436A | CH457437A | CH464202A | CH464203A | CH465617A | CH466283A | CH466284A | CH466285A | CH466286A | CH466287A | CH466288A | CH466289A | CH466290A | CH469721A | CH474509A | CH474510A | CH478795A | CH47…	US3781430A | AU6336778A | CA764963A | CA765823A | CH481116A | FR1563612A | GB1066855A | IE6400445A | JP67006249B | JP67007395B | JP67014556B | JP68008470B | US3313813A | JP70002592B | DE1470053B | DE1795438B	Guanidine derivs diuretics for blood potassium conservation	19640731BE643268A_						16	9
	US3290311A	Derivatives of 3, 5-diamino-6-chloropyrazinoic acid esters and a process for making them		1964-03-31	US1964356038A	US1964356038A	1964-03-31	1966-12-06	MERCK & CO INC	US3290311A | AT277992B | BE639386A | BE643268A | BE651729A | BE651730A | BE653477A | BE653478A | BE653479A | BE653481A | BR196354164D0 | BR196456479D0 | BR6354164D0 | CH457434A | CH457435A | CH457436A | CH457437A | CH464202A | CH464203A | CH465617A | CH466283A | CH466284A | CH466285A | CH466286A | CH466287A | CH466288A | CH466289A | CH466290A | CH469721A | CH474509A | CH474510A | CH478795A | CH47…	BE653477A | AU6447286A | CA742225A | DE1245967A1 | GB1083901A | IE6400441A | JP67006757B | US3290311A | ZA196403508A | FR94601E | CH488709A | NL136266B | DK198104328A	Alkyl 3 5-diamino-6 chloropyrazinoates	19640731BE643268A_						13	13
	US3240802A	Phenylalkyl-aminooxy carboxylic acids		1962-10-30	US1962234236A	US1962234236A	1962-10-30	1966-03-15	COLGATE PALMOLIVE CO	US3240802A | AT277992B | BE639386A | BE643268A | BE651729A | BE651730A | BE653477A | BE653478A | BE653479A | BE653481A | BR196354164D0 | BR196456479D0 | BR6354164D0 | CH457434A | CH457435A | CH457436A | CH457437A | CH464202A | CH464203A | CH465617A | CH466283A | CH466284A | CH466285A | CH466286A | CH466287A | CH466288A | CH466289A | CH466290A | CH469721A | CH474509A | CH474510A | CH478795A | CH47…	US3240802A	(A) Phenylalkyl-aminooxycarboxylic acids of general formula:- (I) R' = H, halogen, OH, alkyl, alkoxy, phenoxy, alkylenedioxy, NO2, NH2, alkylthio R2	19640731BE643268A_						1	1

## Sheet: amlodipine
BACK TO CONTENTS
INN:	amlodipine
Category:	anti-calcium
1. Merck Index
Merck status:	Expired
Merck year:	1986
Merck data:	Prepn: S. F. Campbell et al., EP 89167; eidem, US4572909 (1983, 1986 both to Pfizer).
Merck patents:	EP89167, US4572909
2. Orange Book
Single formulations:	Drug	Dosage form/route	Strength(s)	Proprietary name	Brand supplier	# of generic suppliers	Patents	Data exclusivity	Drug approval date	Co-formulations available	Patented co-formulation	Notes
	amlodipine (BESYLATE)	TABLET; ORAL	EQ 2.5MG BASE, EQ 5MG BASE, or EQ 10MG BASE	NORVASC	PFIZER	28	None	None	1992-07-31	ALISKIREN HEMIFUMARATE+AMLODIPINE BESYLATE, AMLODIPINE BESYLATE+ATORVASTATIN CALCIUM, AMLODIPINE BESYLATE+BENAZEPRIL HYDROCHLORIDE, AMLODIPINE BESYLATE+HYDROCHLOROTHIAZIDE+OLMESARTAN MEDOXOMIL, AMLODIPINE BESYLATE+HYDROCHLOROTHIAZIDE+VALSARTAN, AMLODIPINE BESYLATE+OLMESARTAN MEDOXOMIL, AMLODIPINE BESYLATE+OLMESARTAN MEDOXOMIL, AMLODIPINE BESYLATE+PERINDOPRIL ARGININE, AMLODIPINE BESYLATE+TELMISAR…	YES	Only available as AMLODIPINE BESYLATE		1986
Single formulation patents:	None
Co formulations:	Drug	Dosage form/route	Strength(s)	Proprietary name	Brand supplier	# of generic suppliers	Patents	Data exclusivity	Drug approval date	Co-formulations available	Patented co-formulation	Notes
	ALISKIREN HEMIFUMARATE+AMLODIPINE BESYLATE+HYDROCHLOROTHIAZIDE	TABLET; ORAL	EQ 150MG BASE; EQ 5MG BASE; 12.5MG, EQ 300MG BASE; EQ 10MG BASE; 12.5MG, EQ 300MG BASE; EQ 10MG BASE; 25MG, EQ 300MG BASE; EQ 5MG BASE; 12.5MG, EQ 300MG BASE; EQ 5MG BASE; 25MG	AMTURNIDE	NOVARTIS	None	5559111, 8183295, 8618174	None	2010-12-21
	ALISKIREN HEMIFUMARATE+AMLODIPINE BESYLATE	TABLET; ORAL	EQ 150MG BASE; EQ 10MG BASE, EQ 150MG BASE; EQ 5MG BASE, EQ 300MG BASE; EQ 10MG BASE, EQ 300MG BASE; EQ 5MG BASE	TEKAMLO	NOVARTIS	None	5559111, 8613949	None	2010-08-26
	AMLODIPINE BESYLATE+ATORVASTATIN CALCIUM	TABLET; ORAL	EQ 10MG BASE; EQ 10MG BASE, EQ 10MG BASE; EQ 20MG BASE, EQ 10MG BASE; EQ 40MG BASE, EQ 10MG BASE; EQ 80MG BASE, EQ 2.5MG BASE; EQ 10MG BASE, EQ 2.5MG BASE; EQ 20MG BASE, EQ 2.5MG BASE; EQ 40MG BASE, EQ 5MG BASE; EQ 10MG BASE, EQ 5MG BASE; EQ 20MG BASE, EQ 5MG BASE; EQ 40MG BASE, EQ 5MG BASE; EQ 80MG BASE	CADUET	PFIZER	2	5686104, 5969156, 6455574	None	2004-01-30
	AMLODIPINE BESYLATE+BENAZEPRIL HYDROCHLORIDE	CAPSULE; ORAL	EQ 10MG BASE; 20MG, EQ 10MG BASE; 40MG, EQ 2.5MG BASE; 10MG, EQ 5MG BASE; 10MG, EQ 5MG BASE; 20MG, EQ 5MG BASE; 40MG	LOTREL	NOVARTIS	8	6162802	None	1995-03-03, Jun 20, 2002 (for EQ 5MG BASE;20MG and EQ 10MG BASE;40MG), and Apr 11, 2006 (for EQ 10MG BASE;40MG and EQ 5MG BASE;40MG)
	AMLODIPINE BESYLATE+HYDROCHLOROTHIAZIDE+OLMESARTAN MEDOXOMIL	TABLET; ORAL	EQ 10MG BASE; 12.5MG; 40MG, EQ 10MG BASE; 25MG; 40MG, EQ 5MG BASE; 12.5MG; 20MG, EQ 5MG BASE; 12.5MG; 40MG, and EQ 5MG BASE; 25MG; 40MG	TRIBENZOR	DAIICHI SANKYO	None	5616599	None	2010-07-23
	AMLODIPINE BESYLATE+OLMESARTAN MEDOXOMIL	TABLET; ORAL	EQ 10MG BASE; 20MG, EQ 10MG BASE; 40MG, EQ 5MG BASE; 20MG, and EQ 5MG BASE; 40MG	AZOR	DAIICHI SANKYO	None	5616599	None	2007-09-26
	AMLODIPINE BESYLATE+HYDROCHLOROTHIAZIDE+VALSARTAN	TABLET; ORAL	10MG; 12.5MG; 160MG, 10MG; 25MG; 160MG, 10MG; 25MG; 320MG, 5MG; 12.5MG; 160MG, and 5MG; 25MG; 160MG	EXFORGE HCT	NOVARTIS	None	6294197, 8101599, 8475839	None	2009-04-30
	AMLODIPINE BESYLATE+VALSARTAN	TABLET; ORAL	EQ 10MG BASE; 160MG, EQ 10MG BASE; 320MG, EQ 5MG BASE; 160MG, and EQ 5MG BASE; 320MG	EXFORGE	NOVARTIS	5	6294197, 6395728	None	2007-06-20
OB co-forms w patents:	US5559111, US8183295, US8618174, US8613949, US5686104, US5969156, US6455574, US6162802, US5616599, US6294197, US8101599, US8475839, US6395728
3. HC patent register
Single formulations:	INN	On patent register	Dosage form/route	Strength(s)	Proprietary name	Brand supplier	# of generic suppliers	patents
	amlodipine (BESYLATE)						7
Single formulation patents:	None
Co formulations:	INN	On patent register	Dosage form/route	Strength(s)	Proprietary name	Brand supplier	# of generic suppliers	patents
	telmisartan / amlodipine besylate	YES	tablet	40/5 mg, 40/10 mg, 80/5 mg, 80/10 mg	TWYNSTA	BOEHRINGER INGELHEIM (CANADA) LTD LTEE	NONE	2352436, 2534006, 2582049
	amlodipine besylate and atorvastatin calcium	YES	tablet	5/10MG, 5/20MG, 5/40MG, 5/80MG, 10/10MG, 10/20MG, 10/40MG, 10/80MG	CADUET	PFIZER CANADA INC	1 (GenMed, also Pfizer)	2220018, 2220455, 2220458, 2301732, 2444554, 2450111, 2521776, 2521792, 2521828, 2521833, 2521887, 2521891, 2521908, 2521933, 2521953, 2521956, 2521958, 2521980, 2522899
Co formulation patents:	CA2352436, CA2534006, CA2582049
4. Drug bank patents:	CA2170278, US6828339
5. WO patents:	Patent number	Title	Date	Applicant	Inventor	Abstract	Inclusion/exclusion	Note	Typology	Typology description	APIs listed	Other APIs listed	API categories listed
	WO2008044862	COMBINED PREPARATION FOR THE TREATMENT OF CARDIOVASCULAR DISEASES BASED ON CHRONOTHERAPY THEORY	17.04.2008	HANALL PHARMACEUTICAL CO., LTD.	KIM, Sung Wuk	The present invention relates to a functional combination preparation comprising a dihydropyridine-based calcium channel blocker such as amlodipine and an ARB (Angiotensin-2 receptor blocker) such as losartan. In particular, the present invention relates to a chronotherapeuticalcombination pharmaceutical formulations with controlled-release for the prevention or treatment of cardiovascular diseas…	1		Co-formulation	1 category with other category(ies)	amlodipine, losartan		calcium channel blocker, ARB
	WO2012020368	OLMESARTAN FORMULATIONS	16.02.2012	ABDI IBRAHIM ILAC SANAYI VE TICARET ANONIM SIRKETI	FARSHI, Farhad	The present invention provides pharmaceutical compositions comprising olmesartan or pharmaceutically acceptable salts and esters thereof orcombination with active pharmaceutical ingredient or ingredients such as amlodipine or pharmaceutically acceptable salts and suitable additives for an improved dissolution profiles.	1		Co-formulation	1 specific drug with other category(ies)	olmesartan, amlodipine
	WO2009092819	COMBINATION OF ORAL MEDICAMENTS BONDED BY A WRAPPING	30.07.2009	DUO-GE	LUGRIN, Anne-Emmanuelle	Oral pharmaceutical dosage form containing at least two medicaments, in which form the medicaments on the one hand are brought together in a leakproof and in-vivo water soluble wrapping and on the other hand are separated so that the active principle of the combined medicaments cannot come into contact with one another, at least one of the medicaments being selected from the following therapeutic…	1		Polypill prototype	2 or more with 2 or more other categories	acetylsalicylic acid, propranolol, clopidogrel	spironolactone, clarithromycin, amoxycillin, potassium	non-steroidal anti-inflammatory drug (NSAID), proton pump inhibitor (PPI), beta-blocker, statin, conversion enzyme inhibitor (CEI), biguanide, myorelaxant, calcium inhibitor, corticoid, antidepressant, benzodiazepine, non-atropine-like intestinal transit retarder, intestinal antibacterial
	WO2011001202	SOLID PHARMACEUTICAL FIXED DOSE COMPOSITIONS COMPRISING IRBESARTANAND AMLODIPINE, THEIR PREPARATION AND THEIR THERAPEUTIC APPLICATION	06.01.2011	SANOFI	KHULLAR, Praveen	The present invention is directed to solid stable pharmaceutical fixed dose compositions comprising irbesartan, amlodipine besilate and pharmaceutically acceptable excipients, to their preparation and to their therapeutic application.	1		Co-formulation	2 specific drugs	amlodipine, irbesartan
	WO2007022113	SOLID DOSAGE FORMS OF VALSARTAN AND AMLODIPINE AND METHOD OF MAKING THE SAME	22.02.2007	NOVARTIS AG	JOSHI, Yatindra	Monolayer and bilayer solid dosage forms of a combination of valsartan and amlodipine are made.	1		Co-formulation	2 specific drugs	amlodipine, valsartan
	WO2014097209	A PHARMACEUTICAL COMPOSITION CONTAINING CANDESARTAN CILEXETIL ANDAMLODIPINE	26.06.2014	ADAMED SP. Z O.O.	CIEPLUCHA, Agnieszka	A combination pharmaceutical composition comprising candesartan cilexetil and amiodipine or a pharmaceutically acceptable salt thereof, a process for the preparation of such composition and unit dosage form comprising such a composition. The composition consists of a granulate containingcandesartan cilexetil, polyethylene glycol and other excipients, wherein the weight ratio of candesartan cilexe…	1		Co-formulation	2 specific drugs	candesartan, amiodipine
	WO2011104588	SOLID PHARMACEUTICAL FORMULATIONS OF RAMIPRIL AND AMLODIPINEBESYLATE, AND THEIR PREPARATION	01.09.2011	SANOFI-AVENTIS DEUTSCHLAND GMBH	JAISWAL, Nilesh	The present invention is directed to solid stable pharmaceutical fixed dose compositions comprising ramipril, amlodipine besilate and pharmaceutically acceptable excipients, and to their preparation.	1		Co-formulation	2 specific drugs	ramipril, amlodipine
	WO2013100630	FIXED DOSE COMBINATION FORMULATION COMPRISING LOSARTAN, AMLODIPINE AND HYDROCHLOROTHIAZIDE	04.07.2013	HANMI PHARM. CO., LTD.	KIM, Yong Il	Provided is a fixed dose combination formulation for the prophylaxis or therapy of cardiovascular diseases, comprising losartan, amlodipine andhydrochlorothiazide, which is superior in dissolution rate and stability, having a higher dissolution rate compared to conventional individual single orcombined dosage forms, the fixed dose combination formulation of the present invention exhibits biologic…	1		Co-formulation	3 specific drugs	losartan, amlodipine, hydrochlorothiazide
	WO2008002905	SOLID DOSAGE FORMS OF VALSARTAN, AMLODIPINE AND HYDROCHLOROTHIAZIDEAND METHOD OF MAKING THE SAME	03.01.2008	NOVARTIS AG	CAO, Yu	Monolayer, bilayer and trilayer solid dosage forms of a combination of valsartan, amlodipine and hydrochlorothiazide are made.	1		Co-formulation	3 specific drugs	valsartan, amlodipine, hydrochlorothiazide
	WO2009087410	SOLID PHARMACEUTICAL DOSAGE FORM	16.07.2009	CIPLA LIMITED	LULLA, Amar	A pharmaceutical composition comprising a solid unit dosage form comprising: one or more of pharmaceutically active ingredients selected from valacyclovir, olanzapine, voriconazole, topotecan, artesunate, amodiaquine, guggulosterone, ramipril, telmisartan, tibolone, atorvastatin, simvastatin,amlodipine, ezetimibe, fenofibrate, tacrolimus, valgancyclovir, valsartan, clopidrogel, estradiol, trenbol…	1		Co-formulation	Multiple specific drugs	ramipril, telmisartan, atorvastatin, simvastatin, amlodipine, valsartan, clopidrogel, hydrochlorothiazide,	amodiaquine, valacyclovir, olanzapine, voriconazole, topotecan, artesunate, guggulosterone, tibolone, ezetimibe, fenofibrate, tacrolimus, valgancyclovir, estradiol, trenbolone, efavirenz, metformin, pseudoephedrine, verapamil, felodipine, valproic acid/sodium valproate, mesalamine, levosulpiride, nelfinavir, cefixime and cefpodoxime proxetil
	WO2010085047	SOLID PHARMACEUTICAL COMPOSITION COMPRISING AMLODIPINE AND LOSARTAN	29.07.2010	HANMI HOLDINGS CO., LTD.	WOO, Jong Soo	The present invention relates to a solid pharmaceutical composition for preventing or treating cardiovascular disorders comprising amlodipine andlosartan as active ingredients, and a disintegrant which is a mixture of at least two components selected from the group consisting of sodium starch glycolate, crosscarmellose sodium, and crosspovidone, which exhibits a high and stable level of amlodipin…	1		Co-formulation	2 specific drugs	amlodipine, losartan
	WO2010085027	SOLID PHARMACEUTICAL COMPOSITION COMPRISING AMLODIPINE AND LOSARTAN WITH IMPROVED STABILITY	29.07.2010	HANMI HOLDINGS CO., LTD.	PARK, Jae Hyun	The present invention relates to a solid pharmaceutical composition for preventing or treating cardiovascular disorders comprising granular forms ofamlodipine and losartan which are separated from each other, and a stabilizing agent, which has improved storage stability due to minimized interaction between amlodipine and losartan.	1		Co-formulation	2 specific drugs	amlodipine, losartan
	WO2010085014	SOLID PHARMACEUTICAL COMPOSITION COMPRISING AMLODIPINE AND LOSARTAN AND PROCESS FOR PRODUCING SAME	29.07.2010	HANMI HOLDINGS CO., LTD.	PARK, Jae Hyun	The present invention relates to a solid pharmaceutical composition for preventing or treating cardiovascular disorders comprising amlodipine or a pharmaceutically acceptable salt thereof and losartan or a pharmaceutically acceptable salt thereof, which exhibits high dissolution rates ofamlodipine and losartan even under a low pH condition and improved storage stability.	1		Co-formulation	2 specific drugs	amlodipine, losartan
	WO2012041258	COMPOSITIONS AND METHODS FOR TREATING HYPERTENSION USING EPROSARTAN ANDAMLODIPINE	05.04.2012	TSH BIOPHARM CORPORATION LIMITED	LIN, Jung-Chin	A pharmaceutical composition for treating hypertension or a symptom associated in a subject, the preparing method and the use thereof. Said pharmaceutical composition comprises an effective amount of amlodipine, an effective amount of eprosartan and a pharmaceutically acceptable carrier, provided that the pharmaceutical composition does not further comprise an effective amount of diuretic drug of…	1		Co-formulation	2 specific drugs	eprosartan, amlodipine
	WO2008069612	PHARMACEUTICAL COMPOSITION COMPRISING AMLODIPINE AND LOSARTAN	12.06.2008	HANMI PHARM. CO., LTD.	WOO, Jong Soo	The present invention relates to a pharmaceutical composition comprising a part containing amlodipine or a pharmaceutically acceptable salt thereof and another separate part containing losartan or a pharmaceutically acceptable salt thereof, which exhibits improved preventive and therapeutic effects against cardiovascular disorders.	1		Co-formulation	2 specific drugs	amlodipine, losartan
6. All patents	EP89167, US4572909, US5559111, US8183295, US8618174, US8613949, US5686104, US5969156, US6455574, US6162802, US5616599, US6294197, US8101599, US8475839, US6395728, CA2352436, CA2534006, CA2582049, CA2170278, US6828339, WO2008044862, WO2012020368, WO2009092819, WO2011001202, WO2007022113, WO2014097209, WO2011104588, WO2013100630, WO2008002905, WO2009087410, WO2010085047, WO2010085027, WO2010085014,…
7. Global landscape by starting patent
	Thomson Innovation Patent Export, 2015-05-05 14:41:04 -0400
	Publication Number	Title	Abstract	Application Date	Application Number	Priority Number	Priority Date	Publication Date	Assignee/Applicant	INPADOC Family Members	DWPI Family Members	Title - DWPI	INPADOC Family ID	INPADOC Legal Status	Reassignment (US)	Maintenance Status (US)	Opposition (EP)	License (EP)	DWPI Count of Family Members	DWPI Count of Family Countries	Related Applications
	US5969156C1			1997-10-02	US1997945812A	US19951452P | WO1996US11368A | JP20028746A | US1997945812A | IN2007DE2357A	1995-07-17 | 1996-07-08 | 1996-07-08 | 1997-09-29 | 2007-11-12	2006-09-26			WO1997003959A1 | AU199664842A | ZA199606044A | NO199800207A | EP848705A1 | CZ199800121A3 | SK199800062A3 | BR199609872A | IL122118A | HU199900678A2 | JP11509230A | US5969156A | MX199709099A | KR1999029043A | AU725424B | NZ312907A | NZ507836A | CA2220018C | NO309898B1 | EP848705B1 | EP1148049A1 | DE69616808D1 | ES2167587T3 | JP03296564B2 | CN1190955A | TW486467B | JP2003073353A | MX214428B | KR389…	New crystalline forms of atorvastatin (hypolipidaemic agent) has good filtering and drying properties, and better purity and stability than amorphous form							53	47
	US6455574C1			2000-02-25	US2000512914A	US199757275P | WO1998IB1225A | US2000512914A | US2002214058A | US2003637781A | US2006448100A | US2006499753A | US2009427420A | US2010721065A | US201191622A | US13445339A | US13743897A | US14049286A	1997-08-29 | 1998-08-11 | 2000-02-25 | 2002-08-07 | 2003-08-08 | 2006-06-07 | 2006-08-07 | 2009-04-21 | 2010-03-10 | 2011-04-21 | 2012-04-12 | 2013-01-17 | 2013-10-09	2011-12-13			WO1999011259A1 | AU199885548A | ZA199807844A | NO200000998A | EP1003503A1 | CZ200000511A3 | BR199812030A | CN1268052A | SK200000204A3 | HU200003656A2 | KR2001023498A | JP2001514222A | MX2000002087A | US6455574B1 | US20030008904A1 | AU755636B | NZ516818A | US20040048906A1 | JP2004210797A | EP1003503B1 | EP1468682A1 | DE69826683D1 | EP1491193A1 | TW592696B | CA2301732C | NZ527158A | ES2227865T3 | D…	Use of a synergistic combination of amlodipine and atorvastatin for treating angina pectoris and atherosclerosis							51	85
Compound	EP89167A2	Dihydropyridine anti-ischaemic and antihypertensive agents, processes for their production, and pharmaceutical compositions containing them. | Dihydropyridine als antiischaemische und antihypertonische Mittel, Verfahren zu ihrer Herstellung und diese enthaltende pharmazeutische Zusammensetzungen. | Dihydropyridines comme agents anti-ischaémiques et antihypertensifs, procédé pour leur production e…	Dihydropyridines of the formula:- and their pharmaceutically acceptable acid addition salts wherein Y is-(CH₂)₂-,-(CH₂)₃-,-CH₂CH(CH₃)-or-CH₂C(CH₃)₂-; R is aryl or heteroaryl; R1 and R2 are each independently C₁-C₄ alkyl or 2-methoxyethyl; and R3 is hydrogen, C₁-C₄ alkyl, 2-(C₁-C₄ alkoxyl) ethyl, cyclopropylmethyl, benzyl, or-(CH₂)mCOR⁴ where m is 1, 2 or 3 and R⁴ is hydroxy, C₁-C₄ alkoxy or-NRR5⁶…	1983-03-08	EP1983301227A	GB19827180A	1982-03-11	1983-09-21	Pfizer Limited,Sandwich Kent CT13 9NJ,GB,00204310 | Pfizer Corporation,Colon,PA,00204320	EP89167A2 | AT22884T | AU198312351A | AU540769B2 | BA1997147B1 | BA1998207B1 | BG60658B2 | CA1253865A1 | CS198301499A2 | CS198401592A2 | CS199104188A3 | CS240954B2 | CS240998B2 | DD209622A5 | DD218887A5 | DE19375111I2 | DE3366920D1 | DK161312B | DK161312C | DK198300813A | DK198300813D0 | EG16987A | EP89167A3 | EP89167B1 | ES198503654A1 | ES198505201A1 | ES520389D0 | ES526459D0 | FI198300789A | FI…	EP89167A1 | AU198312351A | JP58167569A | NO198300847A | FI198300789A | DK198300813A | HU27929T | ZA198301651A | PT76370A | DD209622A | DD218887A | CS198301499A | CS198401592A | ES198503654A | ES198505201A | US4572909A | EP89167B1 | DE3366920D1 | SU1227110A | SU1238730A | IL68091A | NO198604435A | JP62006703B | KR198700809B | CA1253865A1 | CS199104188A3	2-Aminoalkoxy-methyl 1,4-di:hydro:pyridine di:carboxylate derivs. with anti:ischaemic, antihypertensive and vasodilating agents	19830223DK198300813D0	2008-12-31 PGFP POSTGRANT: ANNUAL FEES PAID TO NATIONAL OFFICE FR + 1989-03-31 | 2004-03-31 REG REFERENCE TO A NATIONAL CODE BE CCRE EXPIRY OF A COMPLEMENTARY PROTECTION CERTIFICATE - | 2004-03-31 REG REFERENCE TO A NATIONAL CODE GB SPCE SPC EXPIRED SPC/GB93/046: 20040307 SPC/GB93/046 2004-03-07 | 2003-05-06 EUG SE: EUROPEAN PATENT HAS LAPSED - | 2003-05-06 EUG SE: EUROPEAN PATENT HAS LAPSED - | …					26	27
Compound	EP89167A3	DIHYDROPYRIDINE ANTI-ISCHAEMIC AND ANTIHYPERTENSIVE AGENTS, PROCESSES FOR THEIR PRODUCTION, AND PHARMACEUTICAL COMPOSITIONS CONTAINING THEM		1983-03-08	EP1983301227A	GB19827180A	1982-03-11	1984-07-11	PFIZER LIMITED | PFIZER CORPORATION	EP89167A3 | AT22884T | AU198312351A | AU540769B2 | BA1997147B1 | BA1998207B1 | BG60658B2 | CA1253865A1 | CS198301499A2 | CS198401592A2 | CS199104188A3 | CS240954B2 | CS240998B2 | DD209622A5 | DD218887A5 | DE19375111I2 | DE3366920D1 | DK161312B | DK161312C | DK198300813A | DK198300813D0 | EG16987A | EP89167A2 | EP89167B1 | ES198503654A1 | ES198505201A1 | ES520389D0 | ES526459D0 | FI198300789A | FI…			19830223DK198300813D0	2008-12-31 PGFP POSTGRANT: ANNUAL FEES PAID TO NATIONAL OFFICE FR + 1989-03-31 | 2004-03-31 REG REFERENCE TO A NATIONAL CODE BE CCRE EXPIRY OF A COMPLEMENTARY PROTECTION CERTIFICATE - | 2004-03-31 REG REFERENCE TO A NATIONAL CODE GB SPCE SPC EXPIRED SPC/GB93/046: 20040307 SPC/GB93/046 2004-03-07 | 2003-05-06 EUG SE: EUROPEAN PATENT HAS LAPSED - | 2003-05-06 EUG SE: EUROPEAN PATENT HAS LAPSED - | …
Compound	EP89167B1	DIHYDROPYRIDINE ANTI-ISCHAEMIC AND ANTIHYPERTENSIVE AGENTS, PROCESSES FOR THEIR PRODUCTION, AND PHARMACEUTICAL COMPOSITIONS CONTAINING THEM | Dihydropyridines comme agents anti-ischaémiques et antihypertensifs, procédé pour leur production et compositions pharmaceutiques les contenant | Dihydropyridine als antiischaemische und antihypertonische Mittel, Verfahren zu ihrer Herstellung und diese ent…	Dihydropyridines of the formula:- and their pharmaceutically acceptable acid addition salts wherein Y is-(CH₂)₂-,-(CH₂)₃-,-CH₂CH(CH₃)-or-CH₂C(CH₃)₂-; R is aryl or heteroaryl; R1 and R2 are each independently C₁-C₄ alkyl or 2-methoxyethyl; and R3 is hydrogen, C₁-C₄ alkyl, 2-(C₁-C₄ alkoxyl) ethyl, cyclopropylmethyl, benzyl, or-(CH₂)mCOR⁴ where m is 1, 2 or 3 and R⁴ is hydroxy, C₁-C₄ alkoxy or-NRR5⁶…	1983-03-08	EP1983301227A	GB19827180A	1982-03-11	1986-10-15	Pfizer Limited,Sandwich Kent CT13 9NJ,GB,00204310 | Pfizer Corporation,Colon,PA,00204320	EP89167B1 | AT22884T | AU198312351A | AU540769B2 | BA1997147B1 | BA1998207B1 | BG60658B2 | CA1253865A1 | CS198301499A2 | CS198401592A2 | CS199104188A3 | CS240954B2 | CS240998B2 | DD209622A5 | DD218887A5 | DE19375111I2 | DE3366920D1 | DK161312B | DK161312C | DK198300813A | DK198300813D0 | EG16987A | EP89167A2 | EP89167A3 | ES198503654A1 | ES198505201A1 | ES520389D0 | ES526459D0 | FI198300789A | FI…	EP89167A1 | AU198312351A | JP58167569A | NO198300847A | FI198300789A | DK198300813A | HU27929T | ZA198301651A | PT76370A | DD209622A | DD218887A | CS198301499A | CS198401592A | ES198503654A | ES198505201A | US4572909A | EP89167B1 | DE3366920D1 | SU1227110A | SU1238730A | IL68091A | NO198604435A | JP62006703B | KR198700809B | CA1253865A1 | CS199104188A3	2-Aminoalkoxy-methyl 1,4-di:hydro:pyridine di:carboxylate derivs. with anti:ischaemic, antihypertensive and vasodilating agents	19830223DK198300813D0	2008-12-31 PGFP POSTGRANT: ANNUAL FEES PAID TO NATIONAL OFFICE FR + 1989-03-31 | 2004-03-31 REG REFERENCE TO A NATIONAL CODE BE CCRE EXPIRY OF A COMPLEMENTARY PROTECTION CERTIFICATE - | 2004-03-31 REG REFERENCE TO A NATIONAL CODE GB SPCE SPC EXPIRED SPC/GB93/046: 20040307 SPC/GB93/046 2004-03-07 | 2003-05-06 EUG SE: EUROPEAN PATENT HAS LAPSED - | 2003-05-06 EUG SE: EUROPEAN PATENT HAS LAPSED - | …					26	27
Compound	US4572909A	2-(Secondary aminoalkoxymethyl) dihydropyridine derivatives as anti-ischaemic and antihypertensive agents	A dihydropyridine compound of the formula ##STR1## or a pharmaceutically acceptable acid addition salt thereof, wherein<P> <P>Y is--(CH.sub.2).sub.2--,--(CH.sub.2).sub.3--,--CH.sub.2 CH(CH.sub.3)--or--CH.sub.2 C(CH.sub.3).sub.2--;<P><P>R is aryl or heteroaryl;<P><P>R.sup.1 and R.sup.2 are each independently C. sub.1-C.sub.4 alkyl or 2-methoxyethyl; and<P>< P>R.sup.3 is hydrogen, C.sub.1-C.sub.4 a…	1984-02-03	US1984576982A	GB19827180A	1982-03-11	1986-02-25	Pfizer Inc.,New York,NY,US	US4572909A | AT22884T | AU198312351A | AU540769B2 | BA1997147B1 | BA1998207B1 | BG60658B2 | CA1253865A1 | CS198301499A2 | CS198401592A2 | CS199104188A3 | CS240954B2 | CS240998B2 | DD209622A5 | DD218887A5 | DE19375111I2 | DE3366920D1 | DK161312B | DK161312C | DK198300813A | DK198300813D0 | EG16987A | EP89167A2 | EP89167A3 | EP89167B1 | ES198503654A1 | ES198505201A1 | ES520389D0 | ES526459D0 | FI19…	EP89167A1 | AU198312351A | JP58167569A | NO198300847A | FI198300789A | DK198300813A | HU27929T | ZA198301651A | PT76370A | DD209622A | DD218887A | CS198301499A | CS198401592A | ES198503654A | ES198505201A | US4572909A | EP89167B1 | DE3366920D1 | SU1227110A | SU1238730A | IL68091A | NO198604435A | JP62006703B | KR198700809B | CA1253865A1 | CS199104188A3	2-Aminoalkoxy-methyl 1,4-di:hydro:pyridine di:carboxylate derivs. with anti:ischaemic, antihypertensive and vasodilating agents	19830223DK198300813D0	2003-07-08 356 PATENT TERM EXTENSION UNDER 35 U.S.C. 156 + PRODUCT NAME: NORVASC 2003-02-25 2006-07-31 | 1997-06-02 FPAY FEE PAYMENT + | 1994-01-04 356 PATENT TERM EXTENSION UNDER 35 U.S.C. 156 + 1,252 DAYS | 1993-06-09 FPAY FEE PAYMENT + | 1989-06-14 FPAY FEE PAYMENT + | 1984-07-11 AS ASSIGNMENT PFIZER INC., 235 EAST 42ND ST., NEW YORK, NY A DE ASSIGNMENT OF ASSIGNORS INTEREST.;ASSIGNORS:CAMPBEL…	PFIZER INC.,NEW YORK,NY,US PFIZER INC.|235 EAST 42ND ST. A DE CORP. NEW YORK NEW YORK PFIZER INC. CAMPBELL, SIMON F. 1984-06-15 1984 CROSS, PETER E. 1984-06-15 1984 STUBBS, JOHN K. 1984-06-15 1984 004278/0630 1984-07-11 1984 ASSIGNMENT OF ASSIGNORS INTEREST. CHARLES J. KNUTH PFIZER INC. 235 EAST 42ND ST. NEW YORK, NY 10017	XT			26	27	US1983463081A,1983-02-02
	US5616599A	Angiotensin II antagonist 1-biphenylmethylimidazole compounds and their therapeutic use | Angiotensin II antagosist 1-biphenylmethylimidazole compounds and their therapeutic use	Compounds of the following formula (I) or the formula (I).sub. p : ##STR1## wherein R.sup.1 is alkyl or alkenyl; R.sup.2 and R.sup.3 are hydrogen, alkyl, alkenyl, cycloalkyl, aralkyl, aryl, or aryl fused to cycloalkyl; R.sup.4 is hydrogen, alkyl, alkanoyl, alkenoyl, arylcarbonyl, alkoxycarbonyl, tetrahydropyranyl, tetrahydrothiopyranyl, tetrahydrothienyl, tetrahydrofuryl, a group of formula--SiR.…	1995-01-26	US1995378650A	JP199127098A | JP199196588A | JP1991134889A | JP1991167138A | JP1991173972A | JP1991184841A | US1992839482A | JP1992141160A | US199369595A	1991-02-21 | 1991-04-26 | 1991-06-06 | 1991-07-08 | 1991-07-15 | 1991-07-24 | 1992-02-20 | 1992-06-02 | 1993-06-01	1997-04-01	Sankyo Company Limited,Tokyo,JP	US5616599A | AT199548T | AT200777T | AT200778T | AU199211125A | AU199339880A | AU647887B | AU661153B | BR1100452A3 | CA2061607A1 | CA2061607C | CA2097444A1 | CA2097444C | CA2229000A1 | CA2229000C | CN1045770C | CN1051766C | CN1065063A | CN1085896A | CN1101384C | CN1121859C | CN1188645A | CN1189490A | CZ199200516A3 | CZ199301050A3 | CZ287764B6 | CZ289194B6 | CZ289244B6 | DE10299043I1 | DE10299043I…	EP573218A2 | AU199339880A | CZ199301050A3 | HU64329T | NO199301980A | CA2097444A1 | FI199302492A | JP6049036A | ZA199303824A | TW228521B | EP573218A3 | NZ247750A | CN1085896A | AU661153B | US5616599A | US5646171A | IL105825A | RU2086541C1 | NO303872B1 | MX193466B | CZ287764B6 | EP573218B1 | DE69329982D1 | ES2155827T3 | KR300473B | JP03461863B2 | FI112476B1 | PH1199346284B1 | CN1051766C | CA209744…	New 1-(bi:phenyl-methyl)imidazole-5-carboxylic acid derivs. useful as angiotensin II antagonists in the treatment and prophylaxis of hyper-tension and cardiovascular diseases	19920220FI199200749A0	2008-05-14 356 PATENT TERM EXTENSION UNDER 35 U.S.C. 156 + PRODUCT NAME: BENICAR 2014-04-01 2016-04-25 | 2008-04-03 FPAY FEE PAYMENT + | 2007-06-07 AS ASSIGNMENT DAIICHI SANKYO COMPANY, LIMITED, JAPAN MERGER;ASSIGNOR:SANKYO COMPANY, LIMITED;REEL/FRAME:019390/0700 2007-04-01 | 2005-05-03 CC CERTIFICATE OF CORRECTION | 2004-04-28 FPAY FEE PAYMENT + | 2002-10-15 CC CERTIFICATE OF CORRECTION | 2000-0…	DAIICHI SANKYO COMPANY LIMITED,TOKYO,JP DAIICHI SANKYO COMPANY LIMITED|3-5-1, NIHONBASHI HONCHO, CHUO-KU TOKYO JAPAN DAIICHI SANKYO COMPANY, LIMITED SANKYO COMPANY, LIMITED 2007-04-01 2007 019390/0700 2007-06-07 2007 MERGER (SEE DOCUMENT FOR DETAILS). FRISHAUF, HOLTZ, GOODMAN & CHICK, PC 220 FIFTH AVENUE 16TH FLOOR NEW YORK, NY 10001-7708 | SANKYO COMPANY LIMITED,CHUO-KU, TOKYO, JAPAN,JP SANKYO C…	CC			30	34	US1992839482A,1992-02-20 | US199369595A,1993-06-01
	CA2170278A1	Inhibition of Smooth Muscle Cell Migration by (R)-Amlodipine		1994-08-10	CA2170278A	GB199317773A | WO1994EP2697A	1993-08-26 | 1994-08-10	1995-03-02	PFIZER RES & DEV	CA2170278A1 | AT192337T | AU199476129A | AU686658B | CA2170278C | CN1060039C | CN1129907A | DE69424317D1 | DE69424317T2 | DK754043T3 | EP754043A1 | EP754043B1 | ES2145149T3 | GB199317773D0 | GR3033547T3 | IL110700A | IL110700D0 | JP03007992B2 | JP2000044475A | JP8509004A | KR163840B1 | NO199600730A | NO199600730D0 | NO308826B1 | NZ271993A | PT754043E | TW470646B | US6080761A | WO1995005822A1 | ZA…			19931013GB199317773D0	2013-09-23 MKLA LAPSED - 2013-08-12 | 1996-02-23 EEER EXAMINATION REQUEST +
	CA2170278C	INHIBITION OF SMOOTH MUSCLE CELL MIGRATION BY (R)-AMLODIPINE | INHIBITION DE LA MIGRATION DES CELLULES DE MUSCLE LISSE PAR LA (R)-AMLODIPINE	The R(+) isomer of amlodipine is a potent inhibitor of smooth muscle cell migration despite its lack of calcium channel-blocking activity. It is useful for treating atherosclerosis, re-stenosis after angioplasty and endometriosis. L'isomère R(+) de l'amlodipine est un puissant inhibiteur de la migration cellulaire de la fibre lisse malgré son manque d'activité de blocage de canal calcique. Cet is…	1994-08-10	CA2170278A	GB199317773A | WO1994EP2697A	1993-08-26 | 1994-08-10	1999-08-03	PFIZER IRELAND PHARMACEUTICALS,COUNTY DUBLIN,IE	CA2170278C | AT192337T | AU199476129A | AU686658B | CA2170278A1 | CN1060039C | CN1129907A | DE69424317D1 | DE69424317T2 | DK754043T3 | EP754043A1 | EP754043B1 | ES2145149T3 | GB199317773D0 | GR3033547T3 | IL110700A | IL110700D0 | JP03007992B2 | JP2000044475A | JP8509004A | KR163840B1 | NO199600730A | NO199600730D0 | NO308826B1 | NZ271993A | PT754043E | TW470646B | US6080761A | WO1995005822A1 | ZA…	WO1995005822A1 | AU199476129A | NO199600730A | ZA199406475A | JP8509004A | EP754043A1 | CN1129907A | NZ271993A | AU686658B | IL110700A | CA2170278C | JP03007992B2 | JP2000044475A | EP754043B1 | KR163840B1 | DE69424317D1 | ES2145149T3 | US6080761A | NO308826B1 | TW470646B | MX205560B | CN1060039C	New use for optically active amlopidine to treat atherosclerosis, re-stenosis after angioplasty and endometriosis without any concomitant cardiovascular effects.	19931013GB199317773D0	2013-09-23 MKLA LAPSED - 2013-08-12 | 1996-02-23 EEER EXAMINATION REQUEST +					22	30	CA2170278A,1994-08-10 | ,
	US5686104A	Stable oral CI-981 formulation and process of preparing same	An oral pharmaceutical composition is provided for treating hypercholestereolemia or hyperlipidemia containing an advantageous formulation for stabilizing the HMG-CoA coenzyme A inhibitor, CI-981 Hemi-Calcium, of formula (IA) ##STR1## with effective amounts of calcium carbonate. A method for preparing a CI-981 stabilizing composition is described. An oral pharmaceutical composition is provided fo…	1994-05-20	US1994246919A	US19935708A	1993-01-19	1997-11-11	Warner Lambert Company,Morris Plains,NJ,US	US5686104A | AT178794T | CA2150372A1 | CA2150372C | CY2128B1 | DE69324504D1 | DE69324504T2 | DK680320T3 | EP680320A1 | EP680320B1 | ES2133158T3 | GR3030359T3 | JP03254219B2 | JP8505640A | MX199400281A | SG45369A1 | US6126971A | WO1994016693A1	WO1994016693A1 | EP680320A1 | JP8505640A | BR1100081A3 | US5686104A | SG45369A1 | EP680320B1 | DE69324504D1 | ES2133158T3 | US6126971A | MX192869B | JP03254219B2 | CA2150372C | MX227832B	Stable oral compositions for treating hypercholesterolaemia and hyperlipidaemia contain HMG CoA inhibitor which is acid-sensitive substd. pyran ring opened acid form of substd. pyrrolyl carboxamide stabilised with metal salt, esp. calcium carbonate	19940729MX9400281A_	2009-03-26 FPAY FEE PAYMENT + | 2005-03-29 FPAY FEE PAYMENT + | 2001-04-26 FPAY FEE PAYMENT + | 1998-01-20 CC CERTIFICATE OF CORRECTION		CC			14	23	US19935708F,1993-03-10
	US5559111A	delta -amino- gamma -hydroxy- omega -aryl-alkanoic acid amides | &#948;-amino-&#947;-hydroxy-&#969;-aryl-alkanoic acid amides	δ-Amino-γ-hydroxy-ω-aryl-alkanoic acid amides of formula I ##STR1## and the salts thereof, have renin-inhibiting properties and can be used as antihypertensive medicinal active ingredients. delta -Amino- gamma -hydroxy- omega -aryl-alkanoic acid amides of formula I <IMAGE> (I) and the salts thereof, have renin-inhibiting properties and can be used as antihypertensive medicinal active ingredients.	1995-04-04	US1995416242A	CH19941169A	1994-04-18	1996-09-24	Ciba Geigy Corporation,Tarrytown,NY,US	US5559111A | AT183997T | AU199516420A | AU199516421A | AU199516423A | AU699616B | BR1100656A3 | CA2147044A1 | CA2147052A1 | CA2147056A1 | CA2147056C | CN1117960A | CN1153759C | CN1266118C | CN1550491A | CY2208B1 | CZ199500976A3 | CZ287935B6 | DE122007000071I1 | DE122007000071I2 | DE122009000020I1 | DE122011100052I1 | DE59506707D1 | DK678503T3 | EP678500A1 | EP678503A1 | EP678503B1 | EP678514A1 | …	EP678500A1 | AU199516421A | AU199516423A | NO199501441A | NO199501443A | ZA199503051A | ZA199503052A | CZ199500976A3 | FI199501771A | FI199501773A | ZA199503050A | CA2147044A1 | CA2147056A1 | JP8027079A | JP8081430A | US5559111A | NZ270938A | HU74074T | US5627182A | NZ270936A | US5646143A | US5654445A | HU71701T | US5659065A | BR1100656A3 | US5705658A | AU699616B | TW366341B | CZ287935B6 | TW4025…	New amino-alkanoic acid derivs. useful as intermediates for hydroxylated amino-alkanoic acid amide renin inhibitors	19950412FI951771A0	2011-02-17 356 PATENT TERM EXTENSION UNDER 35 U.S.C. 156 + PRODUCT NAME: TEKTURNA 2015-04-04 2018-07-21 | 2008-02-28 FPAY FEE PAYMENT + | 2004-03-02 FPAY FEE PAYMENT + | 2000-08-22 AS ASSIGNMENT NOVARTIS CORPORATION, NEW YORK CHANGE OF NAME;ASSIGNOR:CIBA-GEIGY CORPORATION;REEL/FRAME:011089/0648 1997-06-12 | 2000-03-01 FPAY FEE PAYMENT + | 1996-04-29 AS ASSIGNMENT CIBA-GEIGY CORPORATION, NEW YORK …	NOVARTIS CORPORATION,NEW YORK,NY,US NOVARTIS CORPORATION|608 FIFTH AVENUE NEW YORK NEW YORK 10020 NOVARTIS CORPORATION CIBA-GEIGY CORPORATION 1997-06-12 1997 011089/0648 2000-08-22 2000 CHANGE OF NAME (SEE DOCUMENT FOR DETAILS). NOVARTIS CORPORATION THOMAS HOXIE 564 MORRIS AVENUE SUMMIT, NJ 07901-1027 | CIBA-GEIGY CORPORATION,TARRYTOWN,NY,US CIBA-GEIGY CORPORATION|PATENT DEPARTMENT 520 WHITE PLAI…				42	34
	US6294197B1	Solid oral dosage forms of valsartan	The present invention is concerned with solid dosage forms comprising a) valsartan and optionally HCTZ, and b) pharmaceutically acceptable additives suitable for the preparation of solid oral dosage forms by compression methods.	1999-05-07	US1998202805A	GB199613470A | WO1997EP3172A	1996-06-27 | 1997-06-18	2001-09-25	Novartis AG,Basel,CH	US6294197B1 | AR59324A2 | AR8618A1 | AT276750T | AT371449T | AT446749T | AU199733402A | AU724998B2 | BR199709956A | CA2259148A1 | CA2259148C | CA2673462A1 | CA2673462C | CN1133427C | CN1232394A | CN1475207A | CN1475207B | CN1951372A | CN1951372B | CO4870755A1 | CY2553B1 | CZ199804269A3 | CZ296850B6 | DE69730834D1 | DE69730834T2 | DE69738089D1 | DE69738089T2 | DE69739642D1 | DK1410797T3 | DK176720…	WO1997049394A2 | ZA199705673A | AU199733402A | NO199806056A | CZ199804269A3 | EP914119A2 | SK199801784A3 | BR199709956A | CN1232394A | JP2000506540A | AU724998B | MX199900263A | NZ333385A | KR2000022111A | US6294197B1 | US6485745B1 | TW473394B | US20030035832A1 | RU2203054C2 | JP2003231634A | EP1410797A1 | CN1475207A | HU200203374A2 | NO317181B1 | EP914119B1 | NZ524346A | NO200401287A | DE6973083…	Solid oral dosage form of valsartan used to treat e.g. hypertension, heart failure, angina, myocardial infarction, arteriosclerosis or diabetic nephropathy	19960828GB199613470D0	2013-02-27 FPAY FEE PAYMENT + | 2011-03-23 AS ASSIGNMENT NOVARTIS PHARMACEUTICALS CORPORATION, NEW JERSEY ASSIGNMENT OF ASSIGNORS INTEREST;ASSIGNOR:NOVARTIS AG;REEL/FRAME:026002/0790 2011-03-17 | 2009-02-25 FPAY FEE PAYMENT + | 2005-02-28 FPAY FEE PAYMENT + | 2003-09-09 CC CERTIFICATE OF CORRECTION | 2001-07-30 AS ASSIGNMENT NOVARTIS AG, SWITZERLAND ASSIGNMENT OF ASSIGNORS INTEREST;ASSIGNORS:WAGN…	NOVARTIS PHARMACEUTICALS CORPORATION,EAST HANOVER,NJ,US NOVARTIS PHARMACEUTICALS CORPORATION|ONE HEALTH PLAZA EAST HANOVER NEW JERSEY 07936 NOVARTIS PHARMACEUTICALS CORPORATION NOVARTIS AG 2011-03-17 2011 026002/0790 2011-03-23 2011 ASSIGNMENT OF ASSIGNORS INTEREST (SEE DOCUMENT FOR DETAILS). LINDA ADAMS NOVARTIS PHARMACEUTICALS CORP. ONE HEALTH PLAZA EAST HANOVER, NJ 07936 | NOVARTIS AG,BASEL,CH…	CC			78	81
	US5969156A	Crystalline [R- (R*,R*)]-2-(4-Dfluorophenyl)- beta , delta -dihydroxy-5-(1-methylethyl)-3-phenyl-4-[(phenylamino)carbonyl]-1H-pyrrole-1-heptanoic acid hemi calcium salt (atorvastatin) | Crystalline [R-(R*,R*)]-2-(4-Dfluorophenyl)-&#946;,&#948;-dihydroxy-5-(1-methylethyl)-3-phenyl-4-[(phenylamino)carbonyl]-1H-pyrrole-1-heptanoic acid hemi calcium salt (atorvastatin)	Crystalline forms of atorvastatin and hydrates thereof are useful hypolipidemic and hypocholesterolemic agents. PCT No. PCT/US96/11368 Sec. 371 Date Oct. 2, 1997 Sec. 102(e) Date Oct. 2, 1997 PCT Filed Jul. 8, 1996 PCT Pub. No. WO97/03959 PCT Pub. Date Feb. 6, 1997Crystalline forms of atorvastatin and hydrates thereof are useful hypolipidemic and hypocholesterolemic agents. L'invention porte sur …	1997-10-02	US1997945812A	US19951452P | WO1996US11368A	1995-07-17 | 1996-07-08	1999-10-19	Warner Lambert Company,Morris Plains,NJ,US	US5969156A | AR3458A1 | AR3459A1 | AT208375T | AT284868T | AT8453U1 | AU199664842A | AU725424B2 | BG102187A | BG63630B1 | BR199609872A | CA2220018A1 | CA2220018C | CN1087288C | CN1190955A | CO4700443A1 | CY2358B1 | CZ199800121A3 | CZ294108B6 | CZ294695B6 | CZ294740B6 | DE69616808D1 | DE69616808T2 | DE69634054D1 | DE69634054T2 | DK1148049T3 | DK848705T3 | EA474B1 | EE199800015A | EE3606B1 | EP1148…	WO1997003959A1 | AU199664842A | ZA199606044A | NO199800207A | EP848705A1 | CZ199800121A3 | SK199800062A3 | BR199609872A | IL122118A | HU199900678A2 | JP11509230A | US5969156A | MX199709099A | KR1999029043A | AU725424B | NZ312907A | NZ507836A | CA2220018C | NO309898B1 | EP848705B1 | EP1148049A1 | DE69616808D1 | ES2167587T3 | JP03296564B2 | CN1190955A | TW486467B | JP2003073353A | MX214428B | KR389…	New crystalline forms of atorvastatin (hypolipidaemic agent) has good filtering and drying properties, and better purity and stability than amorphous form	19970203ZA199606044A_	2011-05-02 SULP SURCHARGE FOR LATE PAYMENT + | 2011-05-02 FPAY FEE PAYMENT + | 2007-03-20 FPAY FEE PAYMENT + | 2006-09-26 B1 REEXAMINATION CERTIFICATE FIRST REEXAMINATION + THE PATENTABILITY OF CLAIMS 3, 6-8, 14-15, 20-25, 30, 32-35, 37 AND 39-44 IS CONFIRMED. CLAIMS 1-2,4-5, 9, 28-29, 31, 36 AND 38 ARE DETERMINED TO BE PATENTABLE AS AMENDED. CLAIMS 10-13, 16-19 AND 26-27, DEPENDENT ON AN AMENDED…	WARNER-LAMBERT COMPANY,MORRIS PLAINS,NJ,US WARNER-LAMBERT COMPANY|201 TABOR ROAD MORRIS PLAINS NEW JERSEY 07950 WARNER-LAMBERT COMPANY BRIGGS, CHRISTOPHER A. 1995-08-25 1995 JENNINGS, REX A. 1995-08-25 1995 WADE, ROBERT 1995-08-25 1995 HARASAWA, KIKUKO 1995-09-04 1995 ICHIKAWA, SHIGERU 1995-09-04 1995 MINOHARA, KAZUO 1995-09-04 1995 NAKAGAWA, SHINSUKE 1995-09-04 1995 009229/0968 1998-05-29 1998 A…	C			53	47
	US6455574B1	Therapeutic combination	This invention relates to pharmaceutical combinations of amlodipine or a pharmaceutically acceptable acid addition salt thereof and atorvastatin or a pharmaceutically acceptable salt thereof, kits containing such combinations and methods of using such combinations to treat subjects suffering from angina pectoris, atherosclerosis, combined hypertension and hyperlipidemia and to treat subjects pres…	2000-02-25	US2000512914A	US199757275P | WO1998IB1225A	1997-08-29 | 1998-08-11	2002-09-24	Pfizer Inc.,New York,NY	US6455574B1 | AP1225A | AP199801334D0 | AR12269A1 | AT277615T | AT332689T | AU199885548A | AU755636B2 | BG104177A | BG64665B1 | BR199812030A | CA2301732A1 | CA2301732C | CN101062035A | CN1268052A | CO4970694A1 | CZ200000511A3 | CZ301081B6 | DE69826683D1 | DE69826683T2 | DE69835245D1 | DE69835245T2 | DK1003503T3 | DK1491193T3 | DZ2596A1 | EA3549B1 | EP1003503A1 | EP1003503B1 | EP1468682A1 | EP1491…	WO1999011259A1 | AU199885548A | ZA199807844A | NO200000998A | EP1003503A1 | CZ200000511A3 | BR199812030A | CN1268052A | SK200000204A3 | HU200003656A2 | KR2001023498A | JP2001514222A | MX2000002087A | US6455574B1 | US20030008904A1 | AU755636B | NZ516818A | US20040048906A1 | JP2004210797A | EP1003503B1 | EP1468682A1 | DE69826683D1 | EP1491193A1 | TW592696B | CA2301732C | NZ527158A | ES2227865T3 | D…	Use of a synergistic combination of amlodipine and atorvastatin for treating angina pectoris and atherosclerosis	19980930AP199801334D0	2014-02-25 FPAY FEE PAYMENT + | 2011-12-13 B1 REEXAMINATION CERTIFICATE FIRST REEXAMINATION + THE PATENTABILITY OF CLAIMS 1-12 IS CONFIRMED. | 2010-09-21 RR REQUEST FOR REEXAMINATION FILED + 2010-06-17 | 2010-02-19 FPAY FEE PAYMENT + | 2006-02-28 FPAY FEE PAYMENT +		C			51	85	WO1998IB1225A,1998-08-11 | US199757275P,1997-08-29
	CA2352436A1	POLYMORPHS OF TELMISARTAN, PROCESSES FOR PREPARING THEM AND THEIR USE IN THE PREPARATION OF A PHARMACEUTICAL | POLYMORPHES DE TELMISARTANE, PROCEDES PERMETTANT DE LES PREPARER ET LEUR UTILISAITON POUR PREPARER UN MEDICAMENT | POLYMORPHS OF TELMISARTAN, PROCESSES FOR PREPARING THEM AND THEIR USE IN THE PREPARATION OF A PHARMACEUTICAL COMPOSITION	The invention relates to polymorphs of 4'-[2-n-propyl-4-methyl-6(1- methylbenzimidazol -2-yl) benzimidazol -1-ylmethyl] biphenyl-2-carboxylic acid (INN: telmisartan), and in particular the polymorphous form B of formula (I), characterized by an endothermic peak at 183 ~ 2~C during thermal analysis by differential scanning calorimetry. The invention also relates to mixtures of said polymorphs, met…	2000-01-07	CA2352436A	DE19901921A | WO2000EP65A	1999-01-19 | 2000-01-07	2000-07-27	BOEHRINGER INGELHEIM PHARMA KG,INGELHEIM AM RHEIN,DE	CA2352436A1 | AR35475A1 | AT252564T | AU200022881A | AU765081B2 | BG105654A | BG65027B1 | BR200007584A | CA2352436C | CN1144790C | CN1336920A | CO5150238A1 | CZ200102634A3 | CZ297412B6 | DE19901921A1 | DE19901921C2 | DE50004150D1 | DK1144386T3 | EA3065B1 | EE200100375A | EE4344B1 | EP1144386A1 | EP1144386B1 | ES2208265T3 | HK1041485A1 | HRP20010514A2 | HRP20010514B1 | HU200105148A2 | HU200105148A…			20000727CA2352436A1	2005-01-04 EEER EXAMINATION REQUEST +							CA2352436A,2000-01-07
	CA2352436C	POLYMORPHS OF TELMISARTAN, PROCESSES FOR PREPARING THEM AND THEIR USE IN THE PREPARATION OF A PHARMACEUTICAL COMPOSITION | POLYMORPHES DE TELMISARTANE, PROCEDES PERMETTANT DE LES PREPARER ET LEUR UTILISAITON POUR PREPARER UN MEDICAMENT	The invention relates to polymorphs of 4'-[2-n-propyl-4methyl-6-(1-methylbenzimidazol-2-yl)benzimidazol-1ylmethyl]biphenyl-2-carboxylic acid (INN: telmisartan), particularly polymorphic form B, mixtures of the polymorphs, processes for preparing telmisartan containing form B and the use thereof for preparing a pharmaceutical composition. The invention relates to polymorphs of 4'-[2-n-propyl-4-met…	2000-01-07	CA2352436A	DE19901921A | WO2000EP65A	1999-01-19 | 2000-01-07	2010-03-23	BOEHRINGER INGELHEIM PHARMA GMBH & CO. KG,INGELHEIM,DE	CA2352436C | AR35475A1 | AT252564T | AU200022881A | AU765081B2 | BG105654A | BG65027B1 | BR200007584A | CA2352436A1 | CN1144790C | CN1336920A | CO5150238A1 | CZ200102634A3 | CZ297412B6 | DE19901921A1 | DE19901921C2 | DE50004150D1 | DK1144386T3 | EA3065B1 | EE200100375A | EE4344B1 | EP1144386A1 | EP1144386B1 | ES2208265T3 | HK1041485A1 | HRP20010514A2 | HRP20010514B1 | HU200105148A2 | HU200105148A…	WO2000043370A1 | DE19901921A1 | AU200022881A | DE19901921C2 | EP1144386A1 | NO200103560A | CZ200102634A3 | BR200007584A | SK200101020A3 | US6358986B1 | KR2001101552A | CN1336920A | US6410742B1 | US20020094997A1 | HU200105148A2 | JP2002535315A | ZA200104771A | MX2001006995A | NZ513528A | AU765081B | EP1144386B1 | DE50004150D1 | ES2208265T3 | MX219881B | NO319823B1 | CN1144790C | IN200500372P3 | PH…	New, free-flowing, easily filtered polymorphic crystal modification B of telmisartan, useful as angiotensin antagonist e.g. for treating hypertension or cardiac insufficiency	20000727CA2352436A1	2005-01-04 EEER EXAMINATION REQUEST +					40	53	CA2352436A,2000-01-07 | ,
	US6162802A	Synergistic combination therapy using benazepril and amlodipine for the treatment of cardiovascular disorders and compositions therefor	A method for the treatment of a variety of cardiovascular disorders and related conditions in a mammal having at least one such disorder or condition is disclosed comprising treating the mammal with cotherapy comprising benazepril and amlodipine or pharmaceutically acceptable salts of either or both. Combination formulations of benazepril and amlodipine for use in the method are also disclosed.	1992-03-10	US1992848816A	US1992848816A	1992-03-10	2000-12-19	PAPA; JOSEPH | HENIS; MARC M J	US6162802A	US6162802A	Treatment of cardiovascular disorders by administration of benazepril and amlodipine	20001219US6162802A_	2012-05-23 FPAY FEE PAYMENT + | 2011-05-19 AS ASSIGNMENT NOVARTIS PHARMACEUTICALS CORPORATION, NEW JERSEY ASSIGNMENT OF ASSIGNORS INTEREST;ASSIGNOR:NOVARTIS CORPORATION;REEL/FRAME:026305/0297 2011-05-01 | 2008-06-06 FPAY FEE PAYMENT + | 2004-06-06 FPAY FEE PAYMENT + | 2001-11-20 CC CERTIFICATE OF CORRECTION | 2000-12-15 AS ASSIGNMENT NOVARTIS CORPORATION (PREV. CIBA-GEIGY CORP.), NEW ASSIGNMENT O…	NOVARTIS PHARMACEUTICALS CORPORATION,EAST HANOVER,NJ,US NOVARTIS PHARMACEUTICALS CORPORATION|ONE HEALTH PLAZA EAST HANOVER NEW JERSEY 07936 NOVARTIS PHARMACEUTICALS CORPORATION NOVARTIS CORPORATION 2011-05-01 2011 026305/0297 2011-05-19 2011 ASSIGNMENT OF ASSIGNORS INTEREST (SEE DOCUMENT FOR DETAILS). LINDA ADAMS NOVARTIS PHARMACEUTICALS CORP. ONE HEALTH PLAZA EAST HANOVER, NJ 07936 | NOVARTIS CO…	CC			1	1
	US8618174B2	Synergistic combinations comprising a renin inhibitor for cardiovascular diseases	The invention relates to a combination comprising the renin inhibitor of formula (I) or a pharmaceutically acceptable salt thereof.	2011-09-19	US13235787A	GB200028151A | WO2001EP13241A | US2003416039A	2000-11-17 | 2001-11-15 | 2003-07-25	2013-12-31	Novartis AG,Basel,CH | Hewitt William,Pottstown,PA,US | Vasella Daniel L,Basel,CH | Webb Randy L,Flemington,NJ,US	US8618174B2 | AT317692T | AT397445T | AU2002223680B2 | AU200223680A | BR200115411A | CA2428647A1 | CA2763223A1 | CN100404024C | CN101091703A | CN101264072A | CN101264073A | CN1474690A | CZ299749B6 | DE122009000021I1 | DE60117295D1 | DE60117295T2 | DE60134349D1 | DK1341533T3 | DK1602370T3 | DK1915993T3 | EC2003SP4603A | EP1341533A1 | EP1341533B1 | EP1602370A2 | EP1602370A3 | EP1602370B1 | EP191599…	WO2002040007A1 | AU200223680A | NO200302233A | CZ200301341A3 | EP1341533A1 | HU200301841A2 | KR2003051753A | SK200300584A3 | CN1474690A | JP2004513920A | ZA200303497A | BR200115411A | MX2003004358A | NZ525795A | AU2002223680B2 | IN200300724P4 | EP1602370A2 | EP1341533B1 | DE60117295D1 | ES2256335T3 | DE60117295T2 | MX239582B | NZ537691A | SG135969A1 | RU2310443C2 | NZ550897A | CN101091703A | EP19…	Synergistic composition comprises renin inhibitor and active agent e.g. angiotensin converting enzyme inhibitor for the treatment of e.g. hypertension	20010103GB200028151D0						78	88	US13235787A,2011-09-19 | US2003416039A,2003-07-25 | WO2001EP13241A,2001-11-15
	US6395728B2	Method of treatment and pharmaceutical composition	The invention relates to a method for the treatment or prevention of a condition or disease selected from the group consisting of hypertension, (acute and chronic) congestive heart failure, left ventricular dysfunction and hypertrophic cardiomyopathy, myocardial infarction and its sequelae, supraventricular and ventricular arrhythmias, atrial fibrillation or atrial flutter, atherosclerosis, angin…	2001-01-09	US2001757413A	US1999349654A	1999-07-08	2002-05-28	Novartis AG,Basel,CH	US6395728B2 | US20010049384A1 | US6204281B1	WO2000002543A2 | AU199950349A | NO200100113A | BR199912021A | EP1096932A2 | US6204281B1 | CZ200100087A3 | SK200100031A3 | CN1312715A | US20010049384A1 | KR2001079517A | MX2001000322A | HU200102828A2 | ZA200100232A | US6395728B2 | JP2002520274A | AU753486B | NZ509260A | AU2003200032A1 | KR2004078140A | RU2243768C2 | NZ527598A | IN200100016P4 | CN1733307A | CN1234357C | AU2003200032B2 | KR550167B1 …	Composition for treating e.g. hypertension and myocardial infarction comprises AT1 antagonist comprising valsartan and calcium channel blocker	20010320US6204281B1	2013-10-30 FPAY FEE PAYMENT + | 2011-03-23 AS ASSIGNMENT NOVARTIS PHARMACEUTICALS CORPORATION, NEW JERSEY ASSIGNMENT OF ASSIGNORS INTEREST;ASSIGNOR:NOVARTIS AG;REEL/FRAME:026002/0790 2011-03-17 | 2009-10-28 FPAY FEE PAYMENT + | 2005-10-30 FPAY FEE PAYMENT +	NOVARTIS PHARMACEUTICALS CORPORATION,EAST HANOVER,NJ,US NOVARTIS PHARMACEUTICALS CORPORATION|ONE HEALTH PLAZA EAST HANOVER NEW JERSEY 07936 NOVARTIS PHARMACEUTICALS CORPORATION NOVARTIS AG 2011-03-17 2011 026002/0790 2011-03-23 2011 ASSIGNMENT OF ASSIGNORS INTEREST (SEE DOCUMENT FOR DETAILS). LINDA ADAMS NOVARTIS PHARMACEUTICALS CORP. ONE HEALTH PLAZA EAST HANOVER, NJ 07936				51	86
	US6828339B2	Amlodipine salt forms and processes for preparing them	Amlodipine besylate forms are described, including amlodipine besylate hydrates and novel amlodipine besylate anhydrates. A method of making various amlodipine besylate forms from an aqueous medium as well as the use of the same as a calcium channel blocker are described.	2002-11-20	US2002300003A	US2001331742P	2001-11-21	2004-12-07	Synthon BV,Nijmegen,NL	US6828339B2 | AR37565A1 | AU2002343257A1 | EP1448197A1 | US20030139455A1 | WO2003043635A1	WO2003043635A1 | US20030139455A1 | AU2002343257A1 | EP1448197A1 | US6828339B2 | NO200402539A	New crystalline hydrate, anhydrate and amorphous forms of amlodipine besylate useful for the treatment or prevention of e.g. hypertension, angina pectoris	20030530WO2003043635A1	2013-01-29 FP EXPIRED DUE TO FAILURE TO PAY MAINTENANCE FEE - 2012-12-07 | 2012-12-07 LAPS LAPSE FOR FAILURE TO PAY MAINTENANCE FEES - | 2012-07-23 REMI MAINTENANCE FEE REMINDER MAILED | 2008-12-04 SULP SURCHARGE FOR LATE PAYMENT + | 2008-12-04 FPAY FEE PAYMENT + | 2008-06-16 REMI MAINTENANCE FEE REMINDER MAILED | 2005-05-18 AS ASSIGNMENT SYNTHON IP INC., VIRGINIA ASSIGNMENT OF ASSIGNORS INTEREST…	SYNTHON IP INC.,CATHARPIN,VA,US SYNTHON IP INC.|P.O. BOX 161 CATHARPIN VIRGINIA 20143 SYNTHON IP INC. SYNTHON BV 2005-03-17 2005 016026/0687 2005-05-18 2005 ASSIGNMENT OF ASSIGNORS INTEREST (SEE DOCUMENT FOR DETAILS). MARK R. BUSCHER P.O. BOX 161 CATHARPIN, VA 20143 | SYNTHON BV,NL 6545 CM NIJMEGEN,NL SYNTHON BV|MICROWEG 22 NL 6545 CM NIJMEGEN NETHERLANDS SYNTHON BV ETTEMA, GERRIT J.B. 2003-01-06…	E2			6	99	US2001331742P,2001-11-21
	US8183295B2	Pharmaceutical composition comprising a renin inhibitor, a calcium channel blocker and a diuretic	The invention relates to a pharmaceutical composition comprising (i) a renin inhibitor, (ii) a calcium channel blocker (CCB), and a diuretic and to a method of using such composition for the treatment of cardiovascular disease.	2008-08-08	US2008188604A	US2002381546P | WO2003EP5188A | US2003514683A	2002-05-17 | 2003-05-16 | 2004-11-16	2012-05-22	Novartis Pharmaceuticals Corporation,East Hanover,NJ,US	US8183295B2 | AT520417T | AU2003240669A1 | AU2003240669B2 | BR200310084A | CA2485081A1 | CA2485081C | CN1655819A | DK1507558T3 | EC2004SP5428A | EP1507558A1 | EP1507558B1 | EP1507558B8 | EP2316488A1 | ES2369216T3 | HK1074774A1 | IL164837A | IL164837D0 | JP05288678B2 | JP2005526850A | JP2010280708A | KR2005008717A | KR2010137026A | KR2013109244A | LU92000I2 | MX2004011383A | NO200405459A | NO33438…	WO2003097098A1 | AU2003240669A1 | EP1507558A1 | BR200310084A | NO200405459A | KR2005008717A | US20050182042A1 | JP2005526850A | MX2004011383A | CN1655819A | ZA200408442A | NZ536555A | AU2003240669B2 | RU2316318C2 | IN200402588P4 | US20080300238A1 | MX252472B | IN224613B | JP2010280708A | KR2010137026A | EP2316488A1 | EP1507558B1 | ES2369216T3 | EP1507558B8 | US20120071470A1 | US8183295B2 | HK1074…	Composition useful for treating e.g. heart failure comprises a renin inhibitor, a calcium channel blocker and a diuretic	20031127CA2485081A1	2011-03-23 AS ASSIGNMENT NOVARTIS PHARMACEUTICALS CORPORATION, NEW JERSEY ASSIGNMENT OF ASSIGNORS INTEREST;ASSIGNOR:NOVARTIS AG;REEL/FRAME:026002/0790 2011-03-17 | 2010-09-23 AS ASSIGNMENT NOVARTIS AG, SWITZERLAND ASSIGNMENT OF ASSIGNORS INTEREST;ASSIGNORS:FELDMAN, DAVID LOUIS;WEBB, RANDY LEE;REEL/FRAME:025032/0365 2004-10-26	NOVARTIS PHARMACEUTICALS CORPORATION,EAST HANOVER,NJ,US NOVARTIS PHARMACEUTICALS CORPORATION|ONE HEALTH PLAZA EAST HANOVER NEW JERSEY 07936 NOVARTIS PHARMACEUTICALS CORPORATION NOVARTIS AG 2011-03-17 2011 026002/0790 2011-03-23 2011 ASSIGNMENT OF ASSIGNORS INTEREST (SEE DOCUMENT FOR DETAILS). LINDA ADAMS NOVARTIS PHARMACEUTICALS CORP. ONE HEALTH PLAZA EAST HANOVER, NJ 07936 | NOVARTIS AG,BASEL,CH…				35	91	US2008188604A,2008-08-08 | US2002381546P,2002-05-17 | US2003514683A,2004-11-16 | WO2003EP5188A,2003-05-16
	US8101599B2	Pharmaceutical composition containing anti-hypertensive agents	The present invention relates to a combination of organic compounds, a pharmaceutical composition and a kit of parts comprising said combination of organic compounds and to a method of treatment or prevention of certain conditions or diseases.	2008-12-18	US2008338066A	US2002381547P | WO2003EP5180A | US2003514682A	2002-05-17 | 2003-05-16 | 2005-01-07	2012-01-24	Novartis AG,Basel,CH	US8101599B2 | AR40014A1 | AT429223T | AU2003240261A1 | AU2003240261B2 | BR200310092A | CA2486144A1 | CA2486144C | CN101890166A | CN1652777A | CY1109240T1 | DE60327316D1 | DK1507529T3 | EC2004SP5429A | EG24716A | EP1507529A1 | EP1507529B1 | EP1507529B8 | ES2325207T3 | HK1074773A1 | IL164925A | IL164925D0 | JP05132872B2 | JP2005533023A | JP2010209123A | KR1454070B1 | KR2005000546A | KR2011107877A |…	WO2003097045A1 | AU2003240261A1 | EP1507529A1 | BR200310092A | NO200405429A | KR2005000546A | US20050222137A1 | MX2004011385A | TW200406204A | CN1652777A | JP2005533023A | ZA200408737A | NZ536557A | AU2003240261B2 | IN200402587P4 | RU2324482C2 | US20090099241A1 | EP1507529B1 | DE60327316D1 | ES2325207T3 | IN223313B | MX267988B | EP1507529B8 | JP2010209123A | CN101890166A | KR2011107877A | US81015…	Composition, useful for the treatment of e.g. hypertension and heart diseases, comprises an angiotensin receptor blocker, calcium channel blocker and a diuretic	20031127CA2486144A1	2011-03-23 AS ASSIGNMENT NOVARTIS PHARMACEUTICALS CORPORATION, NEW JERSEY ASSIGNMENT OF ASSIGNORS INTEREST;ASSIGNOR:NOVARTIS AG;REEL/FRAME:026002/0790 2011-03-17 | 2010-09-23 AS ASSIGNMENT NOVARTIS AG, NEW JERSEY ASSIGNMENT OF ASSIGNORS INTEREST;ASSIGNORS:SHETTY, SURAJ SHIVAPPA;WEBB, RANDY LEE;SIGNING DATES FROM 20041026 TO 20041215;REEL/FRAME:025032/0186	NOVARTIS PHARMACEUTICALS CORPORATION,EAST HANOVER,NJ,US NOVARTIS PHARMACEUTICALS CORPORATION|ONE HEALTH PLAZA EAST HANOVER NEW JERSEY 07936 NOVARTIS PHARMACEUTICALS CORPORATION NOVARTIS AG 2011-03-17 2011 026002/0790 2011-03-23 2011 ASSIGNMENT OF ASSIGNORS INTEREST (SEE DOCUMENT FOR DETAILS). LINDA ADAMS NOVARTIS PHARMACEUTICALS CORP. ONE HEALTH PLAZA EAST HANOVER, NJ 07936 | NOVARTIS AG,EAST HAN…				37	93	US2008338066A,2008-12-18 | US2002381547P,2002-05-17 | US2003514682A,2005-01-07 | WO2003EP5180A,2003-05-16
	CA2534006A1	USE OF ANGIOTENSIN II RECEPTOR ANTAGONISTS, ESPECIALLY TELMISARTAN, IN ORDER TO INCREASE INSULIN SENSITIVITY | UTILISATION D'ANTAGONISTES DU RECEPTEUR DE L'ANGIOTENSINE II, EN PARTICULIER DE TELMISARTAN, POUR AUGMENTER LA SENSIBILITE A L'INSULINE | USE OF ANGIOTENSIN II RECEPTOR ANTAGONISTS	The invention relates to the use of angiotensin II receptor antagonists for the treatment of people who have been diagnosed with type 2 diabetes mellitus, or are thought to have prediabetes, in order to prevent diabetes or for the treatment of metabolic syndrome and the resistance of insulin in patients having normal blood pressure. L'invention concerne l'utilisation d'antagonistes du récepteur d…	2004-07-24	CA2534006A	DE10335027A | DE10346260A | DE10356815A | WO2004EP8326A	2003-07-31 | 2003-10-06 | 2003-12-05 | 2004-07-24	2005-02-10	BOEHRINGER INGELHEIM INTERNATIONAL GMBH,INGELHEIM/RHEIN	CA2534006A1 | AT362782T | AT443519T | AT536871T | AU2004204352A1 | AU2004204352B2 | AU2004204353A1 | AU2004260606A1 | AU2004260606B2 | BR200406455A | BR200406812A | BR200413165A | CA2513277A1 | CA2513281A1 | CA2513281C | CA2534006C | CN101926997A | CN102139110A | CN1738617A | CN1738665A | CN1829511A | CN1829511B | CY1109560T1 | DE10301371A1 | DE10301372A1 | DE10335027A1 | DE10346260A1 | DE1035681…			20040729AU2004204352A1	2008-10-29 EEER EXAMINATION REQUEST +							CA2534006A,2004-07-24
	CA2534006C	USE OF ANGIOTENSIN II RECEPTOR ANTAGONISTS | UTILISATION D'ANTAGONISTES DU RECEPTEUR DE L'ANGIOTENSINE II	The invention relates to the use of angiotensin II receptor antagonists for the treatment of people who have been diagnosed with type 2 diabetes mellitus, or are thought to have prediabetes, in order to prevent diabetes or for the treatment of metabolic syndrome and the resistance of insulin in patients having normal blood pressure. L'invention concerne l'utilisation d'antagonistes du récepteur d…	2004-07-24	CA2534006A	DE10335027A | DE10346260A | DE10356815A | WO2004EP8326A	2003-07-31 | 2003-10-06 | 2003-12-05 | 2004-07-24	2010-07-13	BOEHRINGER INGELHEIM INTERNATIONAL GMBH,INGELHEIM AM RHEIN,DE	CA2534006C | AT362782T | AT443519T | AT536871T | AU2004204352A1 | AU2004204352B2 | AU2004204353A1 | AU2004260606A1 | AU2004260606B2 | BR200406455A | BR200406812A | BR200413165A | CA2513277A1 | CA2513281A1 | CA2513281C | CA2534006A1 | CN101926997A | CN102139110A | CN1738617A | CN1738665A | CN1829511A | CN1829511B | CY1109560T1 | DE10301371A1 | DE10301372A1 | DE10335027A1 | DE10346260A1 | DE1035681…	WO2005011680A1 | US20050070594A1 | DE10346260A1 | DE10356815A1 | EP1651213A1 | NO200600938A | AU2004260606A1 | BR200413165A | KR2006054404A | MX2006001322A | ZA200509835A | CN1829511A | JP2007500677A | NZ544877A | WO2005011680A8 | EP1651213B1 | DE502004010117D1 | EP2119441A1 | MX269633B | CA2534006C | IN200908086P1 | AU2004260606B2 | EP2263670A1 | CN101926997A | PH12006500161B1 | JP04833840B2 | C…	Use of an angiotensin II receptor antagonist for treating type 2 diabetes or prediabetes, for preventing diabetes or for treating metabolic syndrome and insulin resistance in patients with normal blood pressure	20040729AU2004204352A1	2008-10-29 EEER EXAMINATION REQUEST +					35	107	CA2534006A,2004-07-24 | ,
	CA2582049A1	BILAYER TABLET COMPRISING TELMISARTAN AND AMLODIPINE | COMPRIME BICOUCHE CONTENANT DU TELMISARTAN ET DE L'AMLODIPINE	A bilayer tablet comprises a first layer formulated for instant release of the angiotensin II receptor antagonist telmisartan from a dissolving tablet matrix and a second layer formulated for instant release of the calcium channel blocker amlodipine from a disintegrating or eroding tablet matrix. L'invention concerne un comprimé bicouche comportant une première couche formulée pour la libération …	2005-10-29	CA2582049A	EP200426234A | WO2005EP11596A	2004-11-05 | 2005-10-29	2006-05-11	BOEHRINGER INGELHEIM INTERNATIONAL GMBH,INGELHEIM AM RHEIN,DE	CA2582049A1 | AR51618A1 | AU2005300787A1 | AU2005300787B2 | BR200517809A | CA2582049C | CN101052381A | CN103083318A | DK1814527T3 | EA13053B1 | EA200700977A1 | EP1814527A1 | EP1814527B1 | ES2452019T3 | HRP20140212T1 | IL182926D0 | JP05134963B2 | JP2008518888A | KR2007085801A | MX2007005235A | MY150758A | NO200701514A | NZ555284A | PE20061046A1 | PE20110216A1 | PT1814527E | RS53141B | SI1814527T1 …			20060511AU2005300787A1	2008-10-03 EEER EXAMINATION REQUEST +							CA2582049A,2005-10-29
	CA2582049C	BILAYER TABLET COMPRISING TELMISARTAN AND AMLODIPINE | COMPRIME BICOUCHE CONTENANT DU TELMISARTAN ET DE L'AMLODIPINE	A bilayer tablet comprises a first layer formulated for instant release of the angiotensin II receptor antagonist telmisartan from a dissolving tablet matrix and a second layer formulated for instant release of the calcium channel blocker amlodipine from a disintegrating or eroding tablet matrix. L'invention concerne un comprimé bicouche comportant une première couche formulée pour la libération …	2005-10-29	CA2582049A	EP200426234A | WO2005EP11596A	2004-11-05 | 2005-10-29	2010-08-24	BOEHRINGER INGELHEIM INTERNATIONAL GMBH,INGELHEIM AM RHEIN,DE	CA2582049C | AR51618A1 | AU2005300787A1 | AU2005300787B2 | BR200517809A | CA2582049A1 | CN101052381A | CN103083318A | DK1814527T3 | EA13053B1 | EA200700977A1 | EP1814527A1 | EP1814527B1 | ES2452019T3 | HRP20140212T1 | IL182926D0 | JP05134963B2 | JP2008518888A | KR2007085801A | MX2007005235A | MY150758A | NO200701514A | NZ555284A | PE20061046A1 | PE20110216A1 | PT1814527E | RS53141B | SI1814527T1 …	WO2006048208A1 | US20060110450A1 | EP1814527A1 | AU2005300787A1 | IN200702978P1 | KR2007085801A | CN101052381A | JP2008518888A | MX2007005235A | ZA200702119A | BR200517809A | NZ555284A | TW200630094A | CA2582049C | VN10009157B | AU2005300787B2 | TWI355268B | JP05134963B2 | CN103083318A | EP1814527B1 | SG132165A1 | SG132165B | ES2452019T3 | HK1184715A0 | PH12007500960B1	Pharmaceutical tablet for treating hypertension alone or in combination with treatment of condition e.g. stroke, has layer of telmisartan in dissolving tablet matrix and layer of amlodipine in disintegrating or eroding tablet matrix	20060511AU2005300787A1	2008-10-03 EEER EXAMINATION REQUEST +					25	114	CA2582049A,2005-10-29 | ,
	WO2007022113A2	SOLID DOSAGE FORMS OF VALSARTAN AND AMLODIPINE AND METHOD OF MAKING THE SAME | FORMES POSOLOGIQUES SOLIDES DE VALSARTAN ET D'AMLODIPINE ET PROCEDE DE PREPARATION AFFERENT	Monolayer and bilayer solid dosage forms of a combination of valsartan and amlodipine are made. L'invention porte sur procédés de préparation de formes posologiques solides bicouches et monocouches d'une association de valsartan et d'amlodipine.	2006-08-15	WO2006US31699A	US2005709083P	2005-08-17	2007-02-22	NOVARTIS AG,CH | NOVARTIS PHARMA GmbH,AT	WO2007022113A2 | AR55120A1 | AU2006279670A1 | AU2010227062A1 | AU2013100625A4 | AU2013100625B4 | AU2013100626A4 | AU2013100626B4 | AU2013200050A1 | BRPI0614790A2 | CA2617367A1 | CN101237859A | EC2008SP8188A | EP1917002A2 | GT200600371A | IL189021D0 | JP2009504744A | JP2013091660A | KR2008034159A | KR2012078751A | KR2012135356A | MA29734B1 | MX2008002267A | NO200801310A | NZ565020A | PE20070420A1 …	WO2007022113A2 | EP1917002A2 | NO200801310A | US20080171086A1 | AU2006279670A1 | CN101237859A | IN200800799P1 | KR2008034159A | JP2009504744A | MX2008002267A | CA2617367A1 | ZA200800397A | TW200740432A | SG164473A1 | AU2010227062A1 | US20100303906A1 | BRPI0614790A2 | NZ565020A | WO2007022113A3 | US20120177733A1 | KR2012078751A | KR2012135356A | AU2013200050A1 | JP2013091660A | SG140112A1 | RU2012…	Solid dosage form of valsartan for treating e.g. hypertension, congestive heart failure, angina, myocardial infarction comprises valsartan; amlodipine; and additive for the preparation of solid dosage forms of valsartan	20070222AU2006279670A1	2011-04-12 ENP ENTRY INTO THE NATIONAL PHASE IN: BR PI0614790 A2 2008-02-18 | 2008-03-17 WWE WIPO INFORMATION: ENTRY INTO NATIONAL PHASE + RU 2008109913 | 2008-03-17 ENP ENTRY INTO THE NATIONAL PHASE IN: RU 2008109913 A | 2008-03-06 ENP ENTRY INTO THE NATIONAL PHASE IN: AU 2006279670 A 2006-08-15 | 2008-02-27 121 EP: THE EPO HAS BEEN INFORMED BY WIPO THAT EP WAS DESIGNATED IN THIS APPLICATION EP …					27	115
	WO2007022113A3	SOLID DOSAGE FORMS OF VALSARTAN AND AMLODIPINE AND METHOD OF MAKING THE SAME | FORMES POSOLOGIQUES SOLIDES DE VALSARTAN ET D'AMLODIPINE ET PROCEDE DE PREPARATION AFFERENT	Monolayer and bilayer solid dosage forms of a combination of valsartan and amlodipine are made. L'invention porte sur procédés de préparation de formes posologiques solides bicouches et monocouches d'une association de valsartan et d'amlodipine.	2006-08-15	WO2006US31699A	US2005709083P	2005-08-17	2007-05-10	NOVARTIS AG,CH | NOVARTIS PHARMA GmbH,AT	WO2007022113A3 | AR55120A1 | AU2006279670A1 | AU2010227062A1 | AU2013100625A4 | AU2013100625B4 | AU2013100626A4 | AU2013100626B4 | AU2013200050A1 | BRPI0614790A2 | CA2617367A1 | CN101237859A | EC2008SP8188A | EP1917002A2 | GT200600371A | IL189021D0 | JP2009504744A | JP2013091660A | KR2008034159A | KR2012078751A | KR2012135356A | MA29734B1 | MX2008002267A | NO200801310A | NZ565020A | PE20070420A1 …	WO2007022113A2 | EP1917002A2 | NO200801310A | US20080171086A1 | AU2006279670A1 | CN101237859A | IN200800799P1 | KR2008034159A | JP2009504744A | MX2008002267A | CA2617367A1 | ZA200800397A | TW200740432A | SG164473A1 | AU2010227062A1 | US20100303906A1 | BRPI0614790A2 | NZ565020A | WO2007022113A3 | US20120177733A1 | KR2012078751A | KR2012135356A | AU2013200050A1 | JP2013091660A | SG140112A1 | RU2012…	Solid dosage form of valsartan for treating e.g. hypertension, congestive heart failure, angina, myocardial infarction comprises valsartan; amlodipine; and additive for the preparation of solid dosage forms of valsartan	20070222AU2006279670A1	2011-04-12 ENP ENTRY INTO THE NATIONAL PHASE IN: BR PI0614790 A2 2008-02-18 | 2008-03-17 WWE WIPO INFORMATION: ENTRY INTO NATIONAL PHASE + RU 2008109913 | 2008-03-17 ENP ENTRY INTO THE NATIONAL PHASE IN: RU 2008109913 A | 2008-03-06 ENP ENTRY INTO THE NATIONAL PHASE IN: AU 2006279670 A 2006-08-15 | 2008-02-27 121 EP: THE EPO HAS BEEN INFORMED BY WIPO THAT EP WAS DESIGNATED IN THIS APPLICATION EP …					27	115
	US8475839B2	Solid dosage forms of valsartan, amlodipine and hydrochlorothiazide and method of making the same	Monolayer, bilayer and trilayer solid dosage forms of a combination of valsartan, amlodipine and hydrochlorothiazide are made.	2012-01-03	US13342533A	US2006805883P | WO2007US72097A | US2007915096A	2006-06-27 | 2007-06-26 | 2007-06-26	2013-07-02	Novartis AG,Basel,CH | Cao Yu,Parsippany,NJ,US | Joshi Yatindra,Princeton,NJ,US | Li Ping,Basking Ridge,NJ,US | Pudipeddi Madhusudhan,Mumbai,IN | Royce Alan E,Saylorsburg,PA,US | Wagner Robert F,Hillsborough,NJ,US | Zhu Jiahao,Whippany,NJ,US	US8475839B2 | AR61627A1 | AU2007265138A1 | BRPI0713785A2 | CA2654986A1 | CL1870200700A1 | CN101478956A | CN101478956B | CN103169711A | EC2008SP8987A | EP2037893A2 | HK1133818A1 | IL195797D0 | JP2009542709A | KR2009021191A | MA30529B1 | MX2008016532A | NO200900314A | NZ573295A | PE20080991A1 | PE20120542A1 | RU2009102273A | RU2449786C2 | TW200808379A | US20100003321A1 | US20120164218A1 | WO2008002…	WO2008002905A2 | WO2008002905A3 | NO200900314A | TW200808379A | EP2037893A2 | KR2009021191A | AU2007265138A1 | CN101478956A | IN200810029P1 | CA2654986A1 | MX2008016532A | JP2009542709A | US20100003321A1 | ZA200810053A | RU2009102273A | AU2011203238A1 | NZ573295A | RU2449786C2 | US20120164218A1 | BRPI0713785A2 | CN101478956B | US8475839B2 | CN103169711A | HK1133818A1 | SG148435A1 | SG148435B | IL…	Solid dosage e.g. bilayer tablet useful for treating hypertension, congestive heart failure, angina comprises valsartan, amlodipine, hydrochlorothiazide and additives	20080103AU2007265138A1	2013-06-04 AS ASSIGNMENT NOVARTIS AG, SWITZERLAND ASSIGNMENT OF ASSIGNORS INTEREST;ASSIGNORS:CAO, YU;JOSHI, YATINDRA;LI, PING;AND OTHERS;SIGNING DATES FROM 20070607 TO 20070618;REEL/FRAME:030538/0513	NOVARTIS AG,BASEL,CH NOVARTIS AG|LICHTRASSE 35 BASEL SWITZERLAND 4056 NOVARTIS AG CAO, YU 2007-06-07 2007 JOSHI, YATINDRA 2007-06-07 2007 LI, PING 2007-06-07 2007 PUDIPEDDI, MADHUSUDHAN 2007-06-18 2007 ROYCE, ALAN EDWARD 2007-06-07 2007 WAGNER, ROBERT FRANK 2007-06-07 2007 ZHU, JIAHAO 2007-06-07 2007 030538/0513 2013-06-04 2013 ASSIGNMENT OF ASSIGNORS INTEREST (SEE DOCUMENT FOR DETAILS). CINDY KL…				27	123	US13342533A,2012-01-03 | US2006805883P,2006-06-27 | US2007915096A,2007-11-20 | WO2007US72097A,2007-06-26
	WO2008002905A2	SOLID DOSAGE FORMS OF VALSARTAN, AMLODIPINE AND HYDROCHLOROTHIAZIDE AND METHOD OF MAKING THE SAME | FORMES GALÉNIQUES SOLIDES DU VALSARTAN, DE L'AMLODIPINE ET DE L'HYDROCHLOROTHIAZIDE ET LEUR MÉTHODE DE FABRICATION	Monolayer, bilayer and trilayer solid dosage forms of a combination of valsartan, amlodipine and hydrochlorothiazide are made. La présente invention porte sur les formes galéniques solides monocouches, bicouches et tricouches d'une combinaison de valsartan, d'amlodipine et d'hydrochlorothiazide.	2007-06-26	WO2007US72097A	US2006805883P	2006-06-27	2008-01-03	NOVARTIS AG,CH | NOVARTIS PHARMA GmbH,AT | CAO Yu,US | JOSHI Yatindra,US | LI Ping,US | PUDIPEDDI Madhusudhan,IN | ROYCE Alan Edward,US | WAGNER Robert Frank,US | ZHU Jiahao,US	WO2008002905A2 | AR61627A1 | AU2007265138A1 | BRPI0713785A2 | CA2654986A1 | CL1870200700A1 | CN101478956A | CN101478956B | CN103169711A | EC2008SP8987A | EP2037893A2 | HK1133818A1 | IL195797D0 | JP2009542709A | KR2009021191A | MA30529B1 | MX2008016532A | NO200900314A | NZ573295A | PE20080991A1 | PE20120542A1 | RU2009102273A | RU2449786C2 | TW200808379A | US20100003321A1 | US20120164218A1 | US8475…	WO2008002905A2 | WO2008002905A3 | NO200900314A | TW200808379A | EP2037893A2 | KR2009021191A | AU2007265138A1 | CN101478956A | IN200810029P1 | CA2654986A1 | MX2008016532A | JP2009542709A | US20100003321A1 | ZA200810053A | RU2009102273A | AU2011203238A1 | NZ573295A | RU2449786C2 | US20120164218A1 | BRPI0713785A2 | CN101478956B | US8475839B2 | CN103169711A | HK1133818A1 | SG148435A1 | SG148435B | IL…	Solid dosage e.g. bilayer tablet useful for treating hypertension, congestive heart failure, angina comprises valsartan, amlodipine, hydrochlorothiazide and additives	20080103AU2007265138A1	2012-10-30 ENP ENTRY INTO THE NATIONAL PHASE IN: BR PI0713785 A2 2008-12-24 | 2009-01-27 ENP ENTRY INTO THE NATIONAL PHASE IN: RU 2009102273 A | 2009-01-08 ENP ENTRY INTO THE NATIONAL PHASE IN: AU 2007265138 A 2007-06-26 | 2008-12-30 NENP NON-ENTRY INTO THE NATIONAL PHASE IN: DE | 2008-12-26 WWE WIPO INFORMATION: ENTRY INTO NATIONAL PHASE + JP 2009518503 | 2008-12-26 ENP ENTRY INTO THE NATIONAL P…					27	123
	WO2008002905A3	SOLID DOSAGE FORMS OF VALSARTAN, AMLODIPINE AND HYDROCHLOROTHIAZIDE AND METHOD OF MAKING THE SAME | FORMES GALÉNIQUES SOLIDES DU VALSARTAN, DE L'AMLODIPINE ET DE L'HYDROCHLOROTHIAZIDE ET LEUR MÉTHODE DE FABRICATION	Monolayer, bilayer and trilayer solid dosage forms of a combination of valsartan, amlodipine and hydrochlorothiazide are made. La présente invention porte sur les formes galéniques solides monocouches, bicouches et tricouches d'une combinaison de valsartan, d'amlodipine et d'hydrochlorothiazide.	2007-06-26	WO2007US72097A	US2006805883P	2006-06-27	2008-12-11	NOVARTIS AG,CH | NOVARTIS PHARMA GmbH,AT | CAO Yu,US | JOSHI Yatindra,US | LI Ping,US | PUDIPEDDI Madhusudhan,IN | ROYCE Alan Edward,US | WAGNER Robert Frank,US | ZHU Jiahao,US	WO2008002905A3 | AR61627A1 | AU2007265138A1 | BRPI0713785A2 | CA2654986A1 | CL1870200700A1 | CN101478956A | CN101478956B | CN103169711A | EC2008SP8987A | EP2037893A2 | HK1133818A1 | IL195797D0 | JP2009542709A | KR2009021191A | MA30529B1 | MX2008016532A | NO200900314A | NZ573295A | PE20080991A1 | PE20120542A1 | RU2009102273A | RU2449786C2 | TW200808379A | US20100003321A1 | US20120164218A1 | US8475…	WO2008002905A2 | WO2008002905A3 | NO200900314A | TW200808379A | EP2037893A2 | KR2009021191A | AU2007265138A1 | CN101478956A | IN200810029P1 | CA2654986A1 | MX2008016532A | JP2009542709A | US20100003321A1 | ZA200810053A | RU2009102273A | AU2011203238A1 | NZ573295A | RU2449786C2 | US20120164218A1 | BRPI0713785A2 | CN101478956B | US8475839B2 | CN103169711A | HK1133818A1 | SG148435A1 | SG148435B | IL…	Solid dosage e.g. bilayer tablet useful for treating hypertension, congestive heart failure, angina comprises valsartan, amlodipine, hydrochlorothiazide and additives	20080103AU2007265138A1	2012-10-30 ENP ENTRY INTO THE NATIONAL PHASE IN: BR PI0713785 A2 2008-12-24 | 2009-01-27 ENP ENTRY INTO THE NATIONAL PHASE IN: RU 2009102273 A | 2009-01-08 ENP ENTRY INTO THE NATIONAL PHASE IN: AU 2007265138 A 2007-06-26 | 2008-12-30 NENP NON-ENTRY INTO THE NATIONAL PHASE IN: DE | 2008-12-26 WWE WIPO INFORMATION: ENTRY INTO NATIONAL PHASE + JP 2009518503 | 2008-12-26 ENP ENTRY INTO THE NATIONAL P…					27	123
	WO2008044862A1	COMBINED PREPARATION FOR THE TREATMENT OF CARDIOVASCULAR DISEASES BASED ON CHRONOTHERAPY THEORY | PRÉPARATION COMBINÉE DESTINÉE À TRAITER DES MALADIES CARDIO-VASCULAIRES EN ACCORD AVEC LA THÉORIE DE LA CHRONOTHÉRAPIE	The present invention relates to a functional combination preparation comprising a dihydropyridine-based calcium channel blocker such as amlodipine and an ARB (Angiotensin-2 receptor blocker) such as losartan. In particular, the present invention relates to a chronotherapeutical combination pharmaceutical formulations with controlled-release for the prevention or treatment of cardiovascular disea…	2007-10-10	WO2007KR4929A	KR200698438A | KR2007101492A	2006-10-10 | 2007-10-09	2008-04-17	HANALL PHARMACEUTICAL CO. LTD.,KR | KIM Sung Wuk,KR | JUN Sung Soo,KR | JO Young Gwan,KR | KOO Ja-Seong,KR | SUN Sang Ouk,KR	WO2008044862A1 | AU2007307482A1 | AU2007307482B2 | BRPI0719969A2 | CA2663805A1 | CN101528203A | CN101528203B | EP2079451A1 | IL197982D0 | JP2010505943A | KR2008032616A | KR888131B1 | MX2009003489A | MY153027A | RU2009117681A | RU2464014C2 | US20100047341A1 | ZA200903204A	WO2008044862A1 | KR2008032616A | KR888131B1 | EP2079451A1 | IN200900956P2 | AU2007307482A1 | CN101528203A | MX2009003489A | JP2010505943A | US20100047341A1 | ZA200903204A | PH12009500667A | RU2009117681A | AU2007307482B2 | CN101528203B | RU2464014C2 | SG151461A1 | SG151461B | BRPI0719969A2 | IL197982A	Combination preparation for treatment of e.g. cardiovascular disease and hypertension comprises dihydropyridine-based calcium channel blocker and angiotensin-2 receptor blocker as active ingredients	20080415KR2008032616A_	2014-02-11 ENP ENTRY INTO THE NATIONAL PHASE IN: BR PI0719969 A2 2009-04-02 | 2009-09-17 WWE WIPO INFORMATION: ENTRY INTO NATIONAL PHASE + US 12445204 | 2009-06-04 ENP ENTRY INTO THE NATIONAL PHASE IN: AU 2007307482 A 2007-10-10 | 2009-05-12 ENP ENTRY INTO THE NATIONAL PHASE IN: RU 2009117681 A | 2009-05-07 WWE WIPO INFORMATION: ENTRY INTO NATIONAL PHASE + AU 2007307482 | 2009-04-15 NENP NON-ENTR…					20	121
	WO2008069612A1	PHARMACEUTICAL COMPOSITION COMPRISING AMLODIPINE AND LOSARTAN | COMPOSITION PHARMACEUTIQUE COMPRENANT DE L'AMLODIPINE ET DU LOSARTAN	The present invention relates to a pharmaceutical composition comprising a part containing amlodipine or a pharmaceutically acceptable salt thereof and another separate part containing losartan or a pharmaceutically acceptable salt thereof, which exhibits improved preventive and therapeutic effects against cardiovascular disorders. La présente invention concerne une composition pharmaceutique com…	2007-12-07	WO2007KR6352A	KR2006124552A	2006-12-08	2008-06-12	HANMI PHARM. CO. LTD.,KR | WOO Jong Soo,KR | YI Hong Gi,KR | CHI Moon Hyuk,KR | KIM Kyeong Soo,KR	WO2008069612A1 | AU2007328630A1 | AU2007328630B2 | BRPI0713306A2 | CA2654054A1 | CA2654054C | CN101472587A | CN101472587B | EC2008SP8980A | EP2037917A1 | EP2037917A4 | EP2037917B1 | ES2522567T3 | HK1131916A1 | IL195581D0 | JP04995912B2 | JP2009544752A | KR1247583B1 | KR2008052852A | MX2008016099A | MY144857A | NO200805302A | NZ573223A | RU2008150477A | RU2401107C2 | UA92641C2 | US20100233261A1 | …	WO2008069612A1 | KR2008052852A | EP2037917A1 | AU2007328630A1 | CN101472587A | NO200805302A | IN200809912P1 | CA2654054A1 | MX2008016099A | JP2009544752A | AU2007328630B2 | ZA200910116A | PH12008502634A | US20100233261A1 | RU2401107C2 | RU2008150477A | BRPI0713306A2 | JP04995912B2 | NZ573223A | CA2654054C | KR1247583B1 | CN101472587B | SG147958A1 | SG147958B | HK1131916A1 | EP2037917B1 | ES252256…	Pharmaceutical composition for preventing or treating cardiovascular disorders e.g. angina pectoris, hypertension, artery vasospasm, deep vein, cardiac hypertrophy, or cerebral infarct, comprises amlodipine and losartan	20080612AU2007328630A1	2012-04-17 ENP ENTRY INTO THE NATIONAL PHASE IN: BR PI0713306 A2 2008-12-19 | 2009-06-09 NENP NON-ENTRY INTO THE NATIONAL PHASE IN: DE | 2008-12-19 WWE WIPO INFORMATION: ENTRY INTO NATIONAL PHASE + RU 2008150477 | 2008-12-19 ENP ENTRY INTO THE NATIONAL PHASE IN: RU 2008150477 A | 2008-12-18 ENP ENTRY INTO THE NATIONAL PHASE IN: AU 2007328630 A 2007-12-07 | 2008-12-11 DPE1 REQUEST FOR PRELIMINARY …					28	122
	WO2009087410A2	SOLID PHARMACEUTICAL DOSAGE FORM | FORME POSOLOGIQUE PHARMACEUTIQUE SOLIDE	A pharmaceutical composition comprising a solid unit dosage form comprising: one or more of pharmaceutically active ingredients selected from valacyclovir, olanzapine, voriconazole, topotecan, artesunate, amodiaquine, guggulosterone, ramipril, telmisartan, tibolone, atorvastatin, simvastatin, amlodipine, ezetimibe, fenofibrate, tacrolimus, valgancyclovir, valsartan, clopidrogel, estradiol, trenbo…	2009-01-12	WO2009GB83A	IN2008MU89A | IN2008MU489A | IN2008MU619A	2008-01-11 | 2008-03-10 | 2008-03-24	2009-07-16	CIPLA LIMITED,IN | CURTIS Philip Anthony,GB | LULLA Amar,IN | MALHOTRA Geena,IN	WO2009087410A2 | AP201005341D0 | AU2009203627A1 | CA2712010A1 | CN101951891A | CO6290635A2 | CR11563A | EP2249808A2 | JP2011509283A | KR2010134557A | MX2010007645A | PA8812601A1 | PE20091550A1 | RU2010133538A | US20110028456A1 | WO2009087410A3	WO2009087410A2 | WO2009087410A3 | IN200800089I3 | AU2009203627A1 | EP2249808A2 | KR2010134557A | MX2010007645A | CA2712010A1 | US20110028456A1 | CN101951891A | JP2011509283A | IN201001512P3 | ZA201005015A | RU2010133538A | HK1150753A0 | SG163132A1	Composition, useful as pharmaceutical dosage form, comprises solid unit dosage form comprising active ingredient e.g. paracetamol, olanzapine, valsartan, clopidogrel, atorvastatin, simvastatin, amlodipine, ezetimibe, and fenofibrate	20090712CA2712010A1	2010-09-23 WWE WIPO INFORMATION: ENTRY INTO NATIONAL PHASE + US 12812432 | 2010-08-11 WWE WIPO INFORMATION: ENTRY INTO NATIONAL PHASE + RU 2010133538 | 2010-08-11 ENP ENTRY INTO THE NATIONAL PHASE IN: RU 2010133538 A | 2010-08-09 ENP ENTRY INTO THE NATIONAL PHASE IN: KR 20107017682 A | 2010-08-05 ENP ENTRY INTO THE NATIONAL PHASE IN: AU 2009203627 A 2009-01-12 | 2010-07-20 WWE WIPO INFORMATION: E…					16	124
	WO2009087410A3	SOLID PHARMACEUTICAL DOSAGE FORM | FORME POSOLOGIQUE PHARMACEUTIQUE SOLIDE	A pharmaceutical composition comprising a solid unit dosage form comprising: one or more of pharmaceutically active ingredients selected from valacyclovir, olanzapine, voriconazole, topotecan, artesunate, amodiaquine, guggulosterone, ramipril, telmisartan, tibolone, atorvastatin, simvastatin, amlodipine, ezetimibe, fenofibrate, tacrolimus, valgancyclovir, valsartan, clopidrogel, estradiol, trenbo…	2009-01-12	WO2009GB83A	IN2008MU89A | IN2008MU489A | IN2008MU619A	2008-01-11 | 2008-03-10 | 2008-03-24	2009-09-17	CIPLA LIMITED,IN | LULLA Amar,IN | MALHOTRA Geena,IN | CURTIS Philip Anthony,GB	WO2009087410A3 | AP201005341D0 | AU2009203627A1 | CA2712010A1 | CN101951891A | CO6290635A2 | CR11563A | EP2249808A2 | JP2011509283A | KR2010134557A | MX2010007645A | PA8812601A1 | PE20091550A1 | RU2010133538A | US20110028456A1 | WO2009087410A2	WO2009087410A2 | WO2009087410A3 | IN200800089I3 | AU2009203627A1 | EP2249808A2 | KR2010134557A | MX2010007645A | CA2712010A1 | US20110028456A1 | CN101951891A | JP2011509283A | IN201001512P3 | ZA201005015A | RU2010133538A | HK1150753A0 | SG163132A1	Composition, useful as pharmaceutical dosage form, comprises solid unit dosage form comprising active ingredient e.g. paracetamol, olanzapine, valsartan, clopidogrel, atorvastatin, simvastatin, amlodipine, ezetimibe, and fenofibrate	20090712CA2712010A1	2010-09-23 WWE WIPO INFORMATION: ENTRY INTO NATIONAL PHASE + US 12812432 | 2010-08-11 WWE WIPO INFORMATION: ENTRY INTO NATIONAL PHASE + RU 2010133538 | 2010-08-11 ENP ENTRY INTO THE NATIONAL PHASE IN: RU 2010133538 A | 2010-08-09 ENP ENTRY INTO THE NATIONAL PHASE IN: KR 20107017682 A | 2010-08-05 ENP ENTRY INTO THE NATIONAL PHASE IN: AU 2009203627 A 2009-01-12 | 2010-07-20 WWE WIPO INFORMATION: E…					16	124
	WO2009092819A1	COMBINATION OF ORAL MEDICAMENTS BONDED BY A WRAPPING | COMBINAISON DE MÉDICAMENTS ORAUX RÉUNIS PAR UNE ENVELOPPE	Oral pharmaceutical dosage form containing at least two medicaments, in which form the medicaments on the one hand are brought together in a leakproof and in-vivo water soluble wrapping and on the other hand are separated so that the active principle of the combined medicaments cannot come into contact with one another, at least one of the medicaments being selected from the following therapeutic…	2009-01-26	WO2009EP50858A	FR200850461A | FR200850460A | US20086652P | US20086651P	2008-01-25 | 2008-01-25 | 2008-01-25 | 2008-01-25	2009-07-30	DUO-GE,FR | LUGRIN Anne-Emmanuelle,FR | GRISCELLI Claude,FR | EL GLAOUI Mehdi,CH | EL GLAOUI Guillaume,FR | HOFFELT Jean,FR	WO2009092819A1 | AU2009207580A1 | AU2009207580A8 | AU2009207580B2 | AU2009207580B8 | CA2713197A1 | CN101969933A | EP2249815A1 | FR2926723A1 | FR2926723B1 | FR2926724A1 | FR2926724B1 | JP2011510049A | JP2015042672A | MX2010008071A | RU2010135514A | RU2493832C2 | US20110027356A1	WO2009092819A1 | FR2926723A1 | FR2926724A1 | FR2926723B1 | FR2926724B1 | AU2009207580A1 | EP2249815A1 | CA2713197A1 | US20110027356A1 | MX2010008071A | CN101969933A | JP2011510049A | IN201001618P3 | RU2010135514A | RU2493832C2 | AU2009207580B2 | AU2009207580A8 | AU2009207580B8 | JP2015042672A	Oral pharmaceutical dosage form e.g. for treatment of hypercholesterolemia, comprises medicaments brought together in water-soluble wrapping and separated so that active principles in combined medicaments do not contact with one another	20090730AU2009207580A1	2010-10-12 WWE WIPO INFORMATION: ENTRY INTO NATIONAL PHASE + US 12864397 | 2010-08-25 WWE WIPO INFORMATION: ENTRY INTO NATIONAL PHASE + RU 2010135514 | 2010-08-25 ENP ENTRY INTO THE NATIONAL PHASE IN: RU 2010135514 A | 2010-08-19 ENP ENTRY INTO THE NATIONAL PHASE IN: AU 2009207580 A 2009-01-26 | 2010-07-27 NENP NON-ENTRY INTO THE NATIONAL PHASE IN: DE | 2010-07-26 WWE WIPO INFORMATION: ENTRY INTO…					19	123
	WO2010085014A1	SOLID PHARMACEUTICAL COMPOSITION COMPRISING AMLODIPINE AND LOSARTAN AND PROCESS FOR PRODUCING SAME | COMPOSITION PHARMACEUTIQUE SOLIDE COMPRENANT DE L'AMLODIPINE ET DU LOSARTAN ET SON PROCÉDÉ DE FABRICATION	The present invention relates to a solid pharmaceutical composition for preventing or treating cardiovascular disorders comprising amlodipine or a pharmaceutically acceptable salt thereof and losartan or a pharmaceutically acceptable salt thereof, which exhibits high dissolution rates of amlodipine and losartan even under a low pH condition and improved storage stability. La présente invention po…	2009-02-13	WO2009KR704A	KR20095840A	2009-01-23	2010-07-29	HANMI PHARM. CO. LTD.,KR | PARK Jae Hyun,KR | KIM Kyeong Soo,KR | YIM Ho Taek,KR	WO2010085014A1 | AR70897A1 | AR75027A1 | AR75028A1 | AU2009338251A1 | AU2009338251B2 | AU2009338267A1 | AU2009338267A2 | AU2009338267B2 | AU2009338280A1 | AU2009338280B2 | CA2749903A1 | CA2749955A1 | CA2749957A1 | CN102292070A | CN102292084A | CN102292084B | CN102292085A | CO6361905A2 | CO6361914A2 | CO6361915A2 | CR20110448A | CR20110449A | CR20110450A | DO2011P0229A | DO2011P0230A | DO2011P0231…	WO2010085014A1 | TW201028150A | TW201028151A | TW201031404A | MX2011006009A | AU2009338267A1 | AU2009338267A2 | CA2749903A1 | US20110245302A1 | CN102292085A | EP2413931A1 | VN28084A | JP2012515767A | ZA201106160A | HK1163541A0 | TWI395583B | TWI404534B | SG173044A1 | AU2009338267B2 | SG173044B | JP05658172B2 | IL214147A	Solid pharmaceutical composition used for preventing or treating cardiovascular disorders, e.g. angina pectoris, comprises amlodipine and losartan which are in granule forms separated from each other	20100226UY32388A_	2011-09-15 ENP ENTRY INTO THE NATIONAL PHASE IN: AU 2009338267 A 2009-02-13 | 2011-08-23 WWE WIPO INFORMATION: ENTRY INTO NATIONAL PHASE + UA a201110285 | 2011-08-23 WWE WIPO INFORMATION: ENTRY INTO NATIONAL PHASE + AU 2009338267 | 2011-08-23 WWE WIPO INFORMATION: ENTRY INTO NATIONAL PHASE + UA A201110285 | 2011-08-22 WWE WIPO INFORMATION: ENTRY INTO NATIONAL PHASE + NZ 594738 | 2011-07-25 NENP N…					22	124
	WO2010085027A1	SOLID PHARMACEUTICAL COMPOSITION COMPRISING AMLODIPINE AND LOSARTAN WITH IMPROVED STABILITY | COMPOSITION PHARMACEUTIQUE SOLIDE COMPRENANT DE L'AMLODIPINE ET DU LOSARTAN AVEC STABILITÉ AMÉLIORÉE	The present invention relates to a solid pharmaceutical composition for preventing or treating cardiovascular disorders comprising granular forms of amlodipine and losartan which are separated from each other, and a stabilizing agent, which has improved storage stability due to minimized interaction between amlodipine and losartan. La présente invention porte sur une composition pharmaceutique so…	2009-06-05	WO2009KR3028A	KR20095840A | KR200936011A	2009-01-23 | 2009-04-24	2010-07-29	HANMI PHARM. CO. LTD.,KR | PARK Jae Hyun,KR | KIM Kyeong Soo,KR | YIM Ho Taek,KR | IM Ji Hyun,KR	WO2010085027A1 | AR70897A1 | AR75027A1 | AR75028A1 | AU2009338251A1 | AU2009338251B2 | AU2009338267A1 | AU2009338267A2 | AU2009338267B2 | AU2009338280A1 | AU2009338280B2 | CA2749903A1 | CA2749955A1 | CA2749957A1 | CN102292070A | CN102292084A | CN102292084B | CN102292085A | CO6361905A2 | CO6361914A2 | CO6361915A2 | CR20110448A | CR20110449A | CR20110450A | DO2011P0229A | DO2011P0230A | DO2011P0231…	WO2010085027A1 | KR2010086913A | MX2011006061A | AU2009338280A1 | CA2749955A1 | US20110245301A1 | EP2391348A1 | CN102292070A | VN28085A | JP2012515768A | ZA201106161A | HK1163540A0 | KR1232296B1 | IN201106350P1 | NZ594740A | SG173046A1 | US8673944B2 | AU2009338280B2 | EP2391348B1 | SG173046B | ES2505116T3 | JP05660544B2 | IL214146A	Solid pharmaceutical composition used for preventing or treating cardiovascular disorders, e.g. angina pectoris, comprises granular forms of amlodipine and losartan which are separated from each other, and stabilizing agent	20100226UY32388A_	2011-09-15 ENP ENTRY INTO THE NATIONAL PHASE IN: AU 2009338280 A 2009-06-05 | 2011-08-23 WWE WIPO INFORMATION: ENTRY INTO NATIONAL PHASE + UA a201110284 | 2011-08-23 WWE WIPO INFORMATION: ENTRY INTO NATIONAL PHASE + AU 2009338280 | 2011-08-23 WWE WIPO INFORMATION: ENTRY INTO NATIONAL PHASE + UA A201110284 | 2011-08-22 WWE WIPO INFORMATION: ENTRY INTO NATIONAL PHASE + NZ 594740 | 2011-07-25 NENP N…					23	125
	WO2010085047A2	SOLID PHARMACEUTICAL COMPOSITION COMPRISING AMLODIPINE AND LOSARTAN | COMPOSITION PHARMACEUTIQUE SOLIDE COMPRENANT DE L'AMLODIPINE ET DU LOSARTAN	The present invention relates to a solid pharmaceutical composition for preventing or treating cardiovascular disorders comprising amlodipine and losartan as active ingredients, and a disintegrant which is a mixture of at least two components selected from the group consisting of sodium starch glycolate, crosscarmellose sodium, and crosspovidone, which exhibits a high and stable level of amlodipi…	2009-12-28	WO2009KR7829A	KR20095840A | KR200990540A	2009-01-23 | 2009-09-24	2010-07-29	HANMI PHARM. CO. LTD.,KR | WOO Jong Soo,KR | PARK Jae Hyun,KR | KIM Yong Il,KR | KIM Kyeong Soo,KR | YIM Ho Taek,KR | IM Ji Hyun,KR	WO2010085047A2 | AR70897A1 | AR75027A1 | AR75028A1 | AU2009338251A1 | AU2009338251B2 | AU2009338267A1 | AU2009338267A2 | AU2009338267B2 | AU2009338280A1 | AU2009338280B2 | CA2749903A1 | CA2749955A1 | CA2749957A1 | CN102292070A | CN102292084A | CN102292084B | CN102292085A | CO6361905A2 | CO6361914A2 | CO6361915A2 | CR20110448A | CR20110449A | CR20110450A | DO2011P0229A | DO2011P0230A | DO2011P0231…	WO2010085047A2 | KR2010086921A | WO2010085047A3 | MX2011006008A | AU2009338251A1 | CA2749957A1 | US20110251245A1 | PH12011501334A | EP2391365A2 | CN102292084A | VN28083A | KR1160151B1 | JP2012515770A | ZA201106162A | HK1163539A0 | NZ594739A | SG173045A1 | AU2009338251B2 | US8673945B2 | CN102292084B | JP05466716B2 | SG173045B | HK1163539A1 | EP2391365B1 | ES2526606T3 | IL214145A	Solid pharmaceutical composition used for preventing or treating cardiovascular disorders, e.g. angina pectoris, comprises amlodipine and losartan, and disintegrant including mixture of sodium starch glycolate and crospovidone	20100226UY32388A_	2011-09-15 ENP ENTRY INTO THE NATIONAL PHASE IN: AU 2009338251 A 2009-12-28 | 2011-08-23 WWE WIPO INFORMATION: ENTRY INTO NATIONAL PHASE + AU 2009338251 | 2011-08-23 WWE WIPO INFORMATION: ENTRY INTO NATIONAL PHASE + UA a201110283 | 2011-08-22 WWE WIPO INFORMATION: ENTRY INTO NATIONAL PHASE + NZ 594739 | 2011-07-22 WWE WIPO INFORMATION: ENTRY INTO NATIONAL PHASE + JP 2011547763 | 2011-07-22 ENP EN…					26	127
	WO2010085047A3	SOLID PHARMACEUTICAL COMPOSITION COMPRISING AMLODIPINE AND LOSARTAN | COMPOSITION PHARMACEUTIQUE SOLIDE COMPRENANT DE L'AMLODIPINE ET DU LOSARTAN	The present invention relates to a solid pharmaceutical composition for preventing or treating cardiovascular disorders comprising amlodipine and losartan as active ingredients, and a disintegrant which is a mixture of at least two components selected from the group consisting of sodium starch glycolate, crosscarmellose sodium, and crosspovidone, which exhibits a high and stable level of amlodipi…	2009-12-28	WO2009KR7829A	KR20095840A | KR200990540A	2009-01-23 | 2009-09-24	2010-11-04	HANMI PHARM. CO. LTD.,KR | WOO Jong Soo,KR | PARK Jae Hyun,KR | KIM Yong Il,KR | KIM Kyeong Soo,KR | YIM Ho Taek,KR | IM Ji Hyun,KR	WO2010085047A3 | AR70897A1 | AR75027A1 | AR75028A1 | AU2009338251A1 | AU2009338251B2 | AU2009338267A1 | AU2009338267A2 | AU2009338267B2 | AU2009338280A1 | AU2009338280B2 | CA2749903A1 | CA2749955A1 | CA2749957A1 | CN102292070A | CN102292084A | CN102292084B | CN102292085A | CO6361905A2 | CO6361914A2 | CO6361915A2 | CR20110448A | CR20110449A | CR20110450A | DO2011P0229A | DO2011P0230A | DO2011P0231…	WO2010085047A2 | KR2010086921A | WO2010085047A3 | MX2011006008A | AU2009338251A1 | CA2749957A1 | US20110251245A1 | PH12011501334A | EP2391365A2 | CN102292084A | VN28083A | KR1160151B1 | JP2012515770A | ZA201106162A | HK1163539A0 | NZ594739A | SG173045A1 | AU2009338251B2 | US8673945B2 | CN102292084B | JP05466716B2 | SG173045B | HK1163539A1 | EP2391365B1 | ES2526606T3 | IL214145A	Solid pharmaceutical composition used for preventing or treating cardiovascular disorders, e.g. angina pectoris, comprises amlodipine and losartan, and disintegrant including mixture of sodium starch glycolate and crospovidone	20100226UY32388A_	2011-09-15 ENP ENTRY INTO THE NATIONAL PHASE IN: AU 2009338251 A 2009-12-28 | 2011-08-23 WWE WIPO INFORMATION: ENTRY INTO NATIONAL PHASE + AU 2009338251 | 2011-08-23 WWE WIPO INFORMATION: ENTRY INTO NATIONAL PHASE + UA a201110283 | 2011-08-22 WWE WIPO INFORMATION: ENTRY INTO NATIONAL PHASE + NZ 594739 | 2011-07-22 WWE WIPO INFORMATION: ENTRY INTO NATIONAL PHASE + JP 2011547763 | 2011-07-22 ENP EN…					26	127
	US8613949B2	Galenical formulations of organic compounds	The present invention relates to a pharmaceutical oral fixed dose combination comprising * a) a therapeutically effective amount of Aliskiren, or a pharmaceutically acceptable salt thereof, * b) a therapeutically effective amount of Amlodipine, or a pharmaceutically acceptable salt thereof, wherein the pharmaceutical oral fixed dose combination shows an in vitro dissolution of component (a) of 60…	2011-03-15	US13063955A	US200898945P | WO2009US57750A	2008-09-22 | 2009-09-22	2013-12-24	Novartis AG,Basel,CH | Valazza Stephen,Matawan,NJ,US | Wagner Robert F,Hillsborough,NJ,US | Vippagunta Sudha,Morris Plains,NJ,US	US8613949B2 | AR73384A1 | AU2009292908A1 | AU2009292908B2 | CA2736257A1 | CN102159195A | CO6351711A2 | EC2011SP010999A | EP2328564A2 | IL211571D0 | JP2012503020A | KR2011060942A | MA32719B1 | MX2011002988A | PE20110293A1 | RU2011115712A | TW201016217A | US20110165240A1 | WO2010033954A2 | WO2010033954A3	WO2010033954A2 | WO2010033954A3 | AU2009292908A1 | TW201016217A | CA2736257A1 | EP2328564A2 | MX2011002988A | KR2011060942A | US20110165240A1 | CN102159195A | ZA201101644A | JP2012503020A | HK1156228A0 | AU2009292908B2 | RU2011115712A | US8613949B2 | SG169467A1 | SG169467B | MX323962B | IL211571A	Oral fixed dose combination, useful for the treatment of e.g. hypertension and atherosclerosis, comprises aliskiren or its hemi-fumarate salt and amlodipine or its besylate salt	20100325AU2009292908A1	2011-03-17 AS ASSIGNMENT NOVARTIS AG, SWITZERLAND ASSIGNMENT OF ASSIGNORS INTEREST;ASSIGNORS:VALAZZA, STEPHEN;WAGNER, ROBERT FRANK;VIPPAGUNTA, SUDHA;REEL/FRAME:025973/0991 2009-09-09	NOVARTIS AG,BASEL,CH NOVARTIS AG|LICHSTRASSE 35 BASEL SWITZERLAND 4056 NOVARTIS AG VALAZZA, STEPHEN 2009-09-09 2009 WAGNER, ROBERT FRANK 2009-09-09 2009 VIPPAGUNTA, SUDHA 2009-09-09 2009 025973/0991 2011-03-17 2011 ASSIGNMENT OF ASSIGNORS INTEREST (SEE DOCUMENT FOR DETAILS). CINDY KLEPACKY ONE HEALTH PLAZA EAST HANOVER, NJ 07936				20	127	US13063955A,2011-03-15 | US200898945P,2008-09-22
	WO2011001202A1	SOLID PHARMACEUTICAL FIXED DOSE COMPOSITIONS COMPRISING IRBESARTAN AND AMLODIPINE, THEIR PREPARATION AND THEIR THERAPEUTIC APPLICATION | COMPOSITIONS À DOSE PHARMACEUTIQUE SOLIDE FIXE COMPRENANT DE L'IRBÉSARTAN ET DE L'AMLODIPINE, LEUR PRÉPARATION ET LEUR APPLICATION THÉRAPEUTIQUE	The present invention is directed to solid stable pharmaceutical fixed dose compositions comprising irbesartan, amlodipine besilate and pharmaceutically acceptable excipients, to their preparation and to their therapeutic application. La présente invention porte sur des compositions pharmaceutiques stables et solides à dose fixe comprenant de l'irbésartan et du bésilate d'amlodipine et des excipi…	2009-09-17	WO2009IB7027A	IN2009DE1341A	2009-06-30	2011-01-06	SANOFI-AVENTIS,FR | KHULLAR Praveen,IN | KOLHE Vinay,IN | KULKARNI Amol,IN | PATEL Shirish,IN | PHADKE Yeshwant,IN | SARAVANAN D.,IN | SHINGTE Mansing,IN	WO2011001202A1 | AR77284A1 | AU2009349125A1 | CA2766884A1 | CN102573804A | CO6480972A2 | CR20110704A | DK2448561T3 | DO2011P000406A | EA201270087A1 | EC2011SP011559A | EP2448561A1 | EP2448561B1 | ES2435240T3 | GT201100337A | HK1169309A1 | HRP20131088T1 | IL217229D0 | JP2012532118A | KR2012102579A | MA33463B1 | MX2011014005A | MY152951A | NZ597317A | PE20121131A1 | PT2448561E | RS53087B | SG177426…	WO2011001202A1 | IN200901341I1 | TW201111368A | CA2766884A1 | AU2009349125A1 | EP2448561A1 | MX2011014005A | US20120171288A1 | CN102573804A | KR2012102579A | IN201200150P2 | VN30078A | JP2012532118A | ZA201109541A | HK1169309A0 | EP2448561B1 | SG177426A1 | HK1169309A1 | PH12011502701B1 | NZ597317A | MX322088B | SG177426B | IL217229A	Stable solid oral pharmaceutical fixed dose composition used for the treatment of hypertension and heart failure, comprises irbesartan, amlodipine besilate and excipients, where irbesartan is physically separated from amlodipine besilate	20110106CA2766884A1	2012-03-21 WWE WIPO INFORMATION: ENTRY INTO NATIONAL PHASE + US 13381534 | 2012-01-27 WWE WIPO INFORMATION: ENTRY INTO NATIONAL PHASE + UA A201200881 | 2012-01-27 ENP ENTRY INTO THE NATIONAL PHASE IN: KR 20127002271 A | 2012-01-19 ENP ENTRY INTO THE NATIONAL PHASE IN: AU 2009349125 A 2009-09-17 | 2011-12-30 NENP NON-ENTRY INTO THE NATIONAL PHASE IN: DE | 2011-12-28 WWE WIPO INFORMATION: ENTRY INT…					23	126
	WO2011104588A2	SOLID PHARMACEUTICAL FORMULATIONS OF RAMIPRIL AND AMLODIPINE BESYLATE, AND THEIR PREPARATION | FORMULATIONS PHARMACEUTIQUES SOLIDES DE RAMIPRIL ET DE BÉSYLATE D'AMLODIPINE ET LEUR PRÉPARATION	The present invention is directed to solid stable pharmaceutical fixed dose compositions comprising ramipril, amlodipine besilate and pharmaceutically acceptable excipients, and to their preparation. La présente invention porte sur des compositions pharmaceutiques stables solides à dose fixée comprenant du ramipril, du bésylate d'amlodipine et des excipients pharmaceutiquement acceptables et sur …	2010-04-14	WO2010IB51616A	IN2010DE417A	2010-02-24	2011-09-01	SANOFI-AVENTIS DEUTSCHLAND GMBH,DE | JAISWAL Nilesh,IN | KHULLAR Praveen,IN | KULKARNI Amol,IN | PRAJAPATI Dilip,IN	WO2011104588A2 | AR80256A1 | AU2010346977A1 | CA2790817A1 | CL2012002341A1 | CN102781430A | CR20120432A | EA201290817A1 | EC2012SP012121A | EP2538924A2 | EP2538924B1 | ES2483154T3 | GT201200248A | JP2013520485A | KR2012130761A | MA34130B1 | MX2012009689A | PE20130004A1 | SG183449A1 | SI2538924T1 | TW201138767A | UA105285C2 | US20130146496A1 | UY33243A | WO2011104588A3	WO2011104588A2 | WO2011104588A3 | AU2010346977A1 | CA2790817A1 | TW201138767A | MX2012009689A | IN201000417I1 | KR2012130761A | EP2538924A2 | CN102781430A | VN32258A | JP2013520485A | US20130146496A1 | HK1178450A0 | PH12012501684A1 | ZA201205559A | SG183449A1 | IN201207574P1 | ID201300396A | EP2538924B1 | ES2483154T3 | IL221616A	Solid oral fixed dose composition, useful to treat arterial hypertension and prevent e.g. cardiovascular diseases including myocardial infarction, and cerebrovascular disorders, comprises ramipril, amlodipine besilate and excipients	20110901CA2790817A1	2012-09-20 WWE WIPO INFORMATION: ENTRY INTO NATIONAL PHASE + UA A201210997 | 2012-09-13 ENP ENTRY INTO THE NATIONAL PHASE IN: AU 2010346977 A 2010-04-14 | 2012-08-23 WWE WIPO INFORMATION: ENTRY INTO NATIONAL PHASE + IL 221616 | 2012-08-23 WWE WIPO INFORMATION: ENTRY INTO NATIONAL PHASE + JP 2012554429 | 2012-08-23 ENP ENTRY INTO THE NATIONAL PHASE IN: KE 0164812 | 2012-08-23 ENP ENTRY INTO THE NA…					22	127
	WO2011104588A3	SOLID PHARMACEUTICAL FORMULATIONS OF RAMIPRIL AND AMLODIPINE BESYLATE, AND THEIR PREPARATION | FORMULATIONS PHARMACEUTIQUES SOLIDES DE RAMIPRIL ET DE BÉSYLATE D'AMLODIPINE ET LEUR PRÉPARATION	The present invention is directed to solid stable pharmaceutical fixed dose compositions comprising ramipril, amlodipine besilate and pharmaceutically acceptable excipients, and to their preparation. La présente invention porte sur des compositions pharmaceutiques stables solides à dose fixée comprenant du ramipril, du bésylate d'amlodipine et des excipients pharmaceutiquement acceptables et sur …	2010-04-14	WO2010IB51616A	IN2010DE417A	2010-02-24	2012-04-19	SANOFI-AVENTIS DEUTSCHLAND GMBH,DE | JAISWAL Nilesh,IN | KHULLAR Praveen,IN | KULKARNI Amol,IN | PRAJAPATI Dilip,IN	WO2011104588A3 | AR80256A1 | AU2010346977A1 | CA2790817A1 | CL2012002341A1 | CN102781430A | CR20120432A | EA201290817A1 | EC2012SP012121A | EP2538924A2 | EP2538924B1 | ES2483154T3 | GT201200248A | JP2013520485A | KR2012130761A | MA34130B1 | MX2012009689A | PE20130004A1 | SG183449A1 | SI2538924T1 | TW201138767A | UA105285C2 | US20130146496A1 | UY33243A | WO2011104588A2	WO2011104588A2 | WO2011104588A3 | AU2010346977A1 | CA2790817A1 | TW201138767A | MX2012009689A | IN201000417I1 | KR2012130761A | EP2538924A2 | CN102781430A | VN32258A | JP2013520485A | US20130146496A1 | HK1178450A0 | PH12012501684A1 | ZA201205559A | SG183449A1 | IN201207574P1 | ID201300396A | EP2538924B1 | ES2483154T3 | IL221616A	Solid oral fixed dose composition, useful to treat arterial hypertension and prevent e.g. cardiovascular diseases including myocardial infarction, and cerebrovascular disorders, comprises ramipril, amlodipine besilate and excipients	20110901CA2790817A1	2012-09-20 WWE WIPO INFORMATION: ENTRY INTO NATIONAL PHASE + UA A201210997 | 2012-09-13 ENP ENTRY INTO THE NATIONAL PHASE IN: AU 2010346977 A 2010-04-14 | 2012-08-23 WWE WIPO INFORMATION: ENTRY INTO NATIONAL PHASE + IL 221616 | 2012-08-23 WWE WIPO INFORMATION: ENTRY INTO NATIONAL PHASE + JP 2012554429 | 2012-08-23 ENP ENTRY INTO THE NATIONAL PHASE IN: KE 0164812 | 2012-08-23 ENP ENTRY INTO THE NA…					22	127
	WO2012020368A1	OLMESARTAN FORMULATIONS | FORMULATIONS D'OLMESARTAN	The present invention provides pharmaceutical compositions comprising olmesartan or pharmaceutically acceptable salts and esters thereof or combination with active pharmaceutical ingredient or ingredients such as amlodipine or pharmaceutically acceptable salts and suitable additives for an improved dissolution profiles. La présente invention concerne des compositions pharmaceutiques comprenant de…	2011-08-08	WO2011IB53532A	EP2010172244A	2010-08-08	2012-02-16	ABDI IBRAHIM ILAC SANAYI VE TICARET ANONIM SIRKETI,TR | FARSHI Farhad,TR | SOYLEMEZ Serdar,TR | AVCI Recep,TR | YILDIRIM Ersin,TR	WO2012020368A1 | EP2425859A1 | EP2637695A1	WO2012020368A1 | EP2425859A1 | EP2637695A1	Preparing pharmaceutical composition of olmesartan or olmesartan with active pharmaceutical ingredient useful for reducing hypertension, and treating heart failure, involves using admixture of olmesartan and solubility enhancing agent	20120216WO2012020368A1	2012-04-04 121 EP: THE EPO HAS BEEN INFORMED BY WIPO THAT EP WAS DESIGNATED IN THIS APPLICATION EP 11754742 A1					3	126
	WO2012041258A1	COMPOSITIONS AND METHODS FOR TREATING HYPERTENSION USING EPROSARTAN AND AMLODIPINE | COMPOSITIONS ET MÉTHODES DE TRAITEMENT DE L'HYPERTENSION AU MOYEN DE L'ÉPROSARTANE ET DE L'AMLODIPINE	A pharmaceutical composition for treating hypertension or a symptom associated in a subject, the preparing method and the use thereof. Said pharmaceutical composition comprises an effective amount of amlodipine, an effective amount of eprosartan and a pharmaceutically acceptable carrier, provided that the pharmaceutical composition does not further comprise an effective amount of diuretic drug of…	2011-09-30	WO2011CN80486A	US2010388092P	2010-09-30	2012-04-05	TSH BIOPHARM CORPORATION LIMITED,CN | LIN Jung-Chin,CN | WANG Hsi-Chieh,CN | HWANG Shiu-Ren,CN | JUANG Shin-Yi,CN	WO2012041258A1 | TW201304775A	WO2012041258A1 | TW201304775A	Treatment of hypertension or its associated symptom comprises administering amlodipine and eprosartan	20120405WO2012041258A1	2013-10-23 122 EP: PCT APP. NOT ENT. EUROP. PHASE - EP 11828154 A1 | 2012-05-23 121 EP: THE EPO HAS BEEN INFORMED BY WIPO THAT EP WAS DESIGNATED IN THIS APPLICATION EP 11828154 A1					2	116
	WO2013100630A1	FIXED DOSE COMBINATION FORMULATION COMPRISING LOSARTAN, AMLODIPINE AND HYDROCHLOROTHIAZIDE | FORMULATION DE COMBINAISON DE DOSES FIXES COMPRENANT DU LOSARTAN, DE L'AMLODIPINE ET DE L'HYDROCHLOROTHIAZIDE	Provided is a fixed dose combination formulation for the prophylaxis or therapy of cardiovascular diseases, comprising losartan, amlodipine and hydrochlorothiazide, which is superior in dissolution rate and stability, having a higher dissolution rate compared to conventional individual single or combined dosage forms, the fixed dose combination formulation of the present invention exhibits biolog…	2012-12-27	WO2012KR11569A	KR2011146867A	2011-12-30	2013-07-04	HANMI PHARM. CO. LTD.,KR	WO2013100630A1 | KR2013078101A	WO2013100630A1 | KR2013078101A	Fixed dose combination formulation useful for preventing or treating cardiovascular disease including angina pectoris, hypertension and cerebral infarction, comprises losartan, amlodipine, and hydrochlorothiazide	20130704WO2013100630A1	2015-01-21 122 EP: PCT APP. NOT ENT. EUROP. PHASE - EP 12861673 A1 | 2013-08-21 121 EP: THE EPO HAS BEEN INFORMED BY WIPO THAT EP WAS DESIGNATED IN THIS APPLICATION EP 12861673 A1					2	117
	WO2014097209A1	A PHARMACEUTICAL COMPOSITION CONTAINING CANDESARTAN CILEXETIL AND AMLODIPINE | COMPOSITION PHARMACEUTIQUE CONTENANT DU CANDÉSARTAN CILEXETIL ET DE L'AMLODIPINE	A combination pharmaceutical composition comprising candesartan cilexetil and amiodipine or a pharmaceutically acceptable salt thereof, a process for the preparation of such composition and unit dosage form comprising such a composition. The composition consists of a granulate containing candesartan cilexetil, polyethylene glycol and other excipients, wherein the weight ratio of candesartan cilex…	2013-12-19	WO2013IB61138A	PL402191A	2012-12-21	2014-06-26	ADAMED SP. Z O.O.,PL	WO2014097209A1 | PL402191A1	WO2014097209A1 | PL402191A1	Composition, useful for treating hypertension in adults, comprises granulate including candesartan cilexetil, polyethylene glycol and excipients, and extragranular phase that is powder blend including amlodipine and excipients	20140623PL402191A1	2014-08-20 121 EP: THE EPO HAS BEEN INFORMED BY WIPO THAT EP WAS DESIGNATED IN THIS APPLICATION EP 13826632 A1					2	118
8. N. American extended	US20140039017A1 US20130131125A1 US20120208854A1 US20120115854A1 US20120164218A1 US8475839B2 US20120071470A1 US20120004312A1 US20120010295A1 US20120016035A1 US8618174B2 US20110201654A1 US20110190277A1 US20110165240A1 CA2150372A1 CA2150372C CA2097444A1 CA2097444C US6162802A CA2061607A1 CA2061607C CA2229000A1 CA2229000C US8613949B2 US20100168187A1 CA2736257A1 US20090297598A1 US20090099241A1 US810159…
	Thomson Innovation Patent Export, 2015-05-06 09:56:15 -0500
	Publication Number	Title	Abstract	Application Date	Application Number	Priority Number	Priority Date	Publication Date	Assignee/Applicant	INPADOC Family Members	DWPI Family Members	Title - DWPI	INPADOC Family ID	INPADOC Legal Status	Reassignment (US)	Maintenance Status (US)	Opposition (EP)	License (EP)	DWPI Count of Family Members	DWPI Count of Family Countries	Related Applications
	US20140039017A1	THERAPEUTIC COMBINATION	This invention relates to pharmaceutical combinations of amlodipine or a pharmaceutically acceptable acid addition salt thereof and atorvastatin or a pharmaceutically acceptable salt thereof, kits containing such combinations and methods of using such combinations to treat subjects suffering from angina pectoris, atherosclerosis, combined hypertension and hyperlipidemia and to treat subjects pres…	2013-10-09	US14049286A	US199757275P | WO1998IB1225A | US2000512914A | US2002214058A | US2006448100A | US13091622A | US13445339A | US13743897A	1997-08-29 | 1998-08-11 | 2000-02-25 | 2002-08-07 | 2006-06-07 | 2011-04-21 | 2012-04-12 | 2013-01-17	2014-02-06	Donald Robert Andrew,Riverside,CT,US	US20140039017A1 | AP1225A | AP199801334D0 | AR12269A1 | AT277615T | AT332689T | AU199885548A | AU755636B2 | BG104177A | BG64665B1 | BR199812030A | CA2301732A1 | CA2301732C | CN101062035A | CN1268052A | CO4970694A1 | CZ200000511A3 | CZ301081B6 | DE69826683D1 | DE69826683T2 | DE69835245D1 | DE69835245T2 | DK1003503T3 | DK1491193T3 | DZ2596A1 | EA3549B1 | EP1003503A1 | EP1003503B1 | EP1468682A1 | EP…	WO1999011259A1 | AU199885548A | ZA199807844A | NO200000998A | EP1003503A1 | CZ200000511A3 | BR199812030A | CN1268052A | SK200000204A3 | HU200003656A2 | KR2001023498A | JP2001514222A | MX2000002087A | US6455574B1 | US20030008904A1 | AU755636B | NZ516818A | US20040048906A1 | JP2004210797A | EP1003503B1 | EP1468682A1 | DE69826683D1 | EP1491193A1 | TW592696B | CA2301732C | NZ527158A | ES2227865T3 | D…	Use of a synergistic combination of amlodipine and atorvastatin for treating angina pectoris and atherosclerosis	19980930AP199801334D0						51	85	US199757275P,1997-08-29 | US13743897A,2013-01-17 | US13445339A,2012-04-12 | US13091622A,2011-04-21 | US2006448100A,2006-06-07 | US2002214058A,2002-08-07 | US2000512914A,2000-02-25 | WO1998IB1225A,1998-08-11
	US20130131125A1	THERAPEUTIC COMBINATION	This invention relates to pharmaceutical combinations of amlodipine or a pharmaceutically acceptable acid addition salt thereof and atorvastatin or a pharmaceutically acceptable salt thereof, kits containing such combinations and methods of using such combinations to treat subjects suffering from angina pectoris, atherosclerosis, combined hypertension and hyperlipidemia and to treat subjects pres…	2013-01-17	US13743897A	US199757275P | WO1998IB1225A | US2000512914A | US2002214058A | US2006448100A | US13091622A | US13445339A	1997-08-29 | 1998-08-11 | 2000-02-25 | 2002-08-07 | 2006-06-07 | 2011-04-21 | 2012-04-12	2013-05-23	Scott Robert Andrew Donald,Riverside,CT,US	US20130131125A1 | AP1225A | AP199801334D0 | AR12269A1 | AT277615T | AT332689T | AU199885548A | AU755636B2 | BG104177A | BG64665B1 | BR199812030A | CA2301732A1 | CA2301732C | CN101062035A | CN1268052A | CO4970694A1 | CZ200000511A3 | CZ301081B6 | DE69826683D1 | DE69826683T2 | DE69835245D1 | DE69835245T2 | DK1003503T3 | DK1491193T3 | DZ2596A1 | EA3549B1 | EP1003503A1 | EP1003503B1 | EP1468682A1 | EP…	WO1999011259A1 | AU199885548A | ZA199807844A | NO200000998A | EP1003503A1 | CZ200000511A3 | BR199812030A | CN1268052A | SK200000204A3 | HU200003656A2 | KR2001023498A | JP2001514222A | MX2000002087A | US6455574B1 | US20030008904A1 | AU755636B | NZ516818A | US20040048906A1 | JP2004210797A | EP1003503B1 | EP1468682A1 | DE69826683D1 | EP1491193A1 | TW592696B | CA2301732C | NZ527158A | ES2227865T3 | D…	Use of a synergistic combination of amlodipine and atorvastatin for treating angina pectoris and atherosclerosis	19980930AP199801334D0						51	85	US199757275P,1997-08-29 | US13445339A,2012-04-12 | US13091622A,2011-04-21 | US2006448100A,2006-06-07 | US2002214058A,2002-08-07 | US2000512914A,2000-02-25 | WO1998IB1225A,1998-08-11
	US20120208854A1	THERAPEUTIC COMBINATION	This invention relates to pharmaceutical combinations of amlodipine or a pharmaceutically acceptable acid addition salt thereof and atorvastatin or a pharmaceutically acceptable salt thereof, kits containing such combinations and methods of using such combinations to treat subjects suffering from angina pectoris, atherosclerosis, combined hypertension and hyperlipidemia and to treat subjects pres…	2012-04-12	US13445339A	US199757275P | WO1998IB1225A | US2000512914A | US2002214058A | US2006448100A | US13091622A	1997-08-29 | 1998-08-11 | 2000-02-25 | 2002-08-07 | 2006-06-07 | 2011-04-21	2012-08-16		US20120208854A1 | AP1225A | AP199801334D0 | AR12269A1 | AT277615T | AT332689T | AU199885548A | AU755636B2 | BG104177A | BG64665B1 | BR199812030A | CA2301732A1 | CA2301732C | CN101062035A | CN1268052A | CO4970694A1 | CZ200000511A3 | CZ301081B6 | DE69826683D1 | DE69826683T2 | DE69835245D1 | DE69835245T2 | DK1003503T3 | DK1491193T3 | DZ2596A1 | EA3549B1 | EP1003503A1 | EP1003503B1 | EP1468682A1 | EP…	WO1999011259A1 | AU199885548A | ZA199807844A | NO200000998A | EP1003503A1 | CZ200000511A3 | BR199812030A | CN1268052A | SK200000204A3 | HU200003656A2 | KR2001023498A | JP2001514222A | MX2000002087A | US6455574B1 | US20030008904A1 | AU755636B | NZ516818A | US20040048906A1 | JP2004210797A | EP1003503B1 | EP1468682A1 | DE69826683D1 | EP1491193A1 | TW592696B | CA2301732C | NZ527158A | ES2227865T3 | D…	Use of a synergistic combination of amlodipine and atorvastatin for treating angina pectoris and atherosclerosis	19980930AP199801334D0						51	85	US199757275P,1997-08-29 | US13091622A,2011-04-21 | US2006448100A,2006-06-07 | US2002214058A,2002-08-07 | US2000512914A,2000-02-25 | WO1998IB1225A,1998-08-11
	US20120115854A1	PHARMACEUTICAL COMPOSITION CONTAINING ANTIHYPERTENSIVE AGENTS	The present invention relates to a combination of organic compounds, a pharmaceutical composition and a kit of parts comprising said combination of organic compounds and to a method of treatment or prevention of certain conditions or diseases.	2012-01-12	US13348833A	US2002381547P | WO2003EP5180A | US2003514682A | US2008338066A	2002-05-17 | 2003-05-16 | 2005-01-07 | 2008-12-18	2012-05-10		US20120115854A1 | AR40014A1 | AT429223T | AU2003240261A1 | AU2003240261B2 | BR200310092A | CA2486144A1 | CA2486144C | CN101890166A | CN1652777A | CY1109240T1 | DE60327316D1 | DK1507529T3 | EC2004SP5429A | EG24716A | EP1507529A1 | EP1507529B1 | EP1507529B8 | ES2325207T3 | HK1074773A1 | IL164925A | IL164925D0 | JP05132872B2 | JP2005533023A | JP2010209123A | KR1454070B1 | KR2005000546A | KR201110787…	WO2003097045A1 | AU2003240261A1 | EP1507529A1 | BR200310092A | NO200405429A | KR2005000546A | US20050222137A1 | MX2004011385A | TW200406204A | CN1652777A | JP2005533023A | ZA200408737A | NZ536557A | AU2003240261B2 | IN200402587P4 | RU2324482C2 | US20090099241A1 | EP1507529B1 | DE60327316D1 | ES2325207T3 | IN223313B | MX267988B | EP1507529B8 | JP2010209123A | CN101890166A | KR2011107877A | US81015…	Composition, useful for the treatment of e.g. hypertension and heart diseases, comprises an angiotensin receptor blocker, calcium channel blocker and a diuretic	20031127CA2486144A1						37	93	US2002381547P,2002-05-17 | US2008338066A,2008-12-18 | US2003514682A,2005-01-07 | WO2003EP5180A,2003-05-16
	US20120164218A1	SOLID DOSAGE FORMS OF VALSARTAN, AMLODIPINE AND HYDROCHLOROTHIAZIDE AND METHOD OF MAKING THE SAME	Monolayer, bilayer and trilayer solid dosage forms of a combination of valsartan, amlodipine and hydrochlorothiazide are made.	2012-01-03	US13342533A	US2006805883P | WO2007US72097A | US2007915096A	2006-06-27 | 2007-06-26 | 2007-06-26	2012-06-28		US20120164218A1 | AR61627A1 | AU2007265138A1 | BRPI0713785A2 | CA2654986A1 | CL1870200700A1 | CN101478956A | CN101478956B | CN103169711A | EC2008SP8987A | EP2037893A2 | HK1133818A1 | IL195797D0 | JP2009542709A | KR2009021191A | MA30529B1 | MX2008016532A | NO200900314A | NZ573295A | PE20080991A1 | PE20120542A1 | RU2009102273A | RU2449786C2 | TW200808379A | US20100003321A1 | US8475839B2 | WO2008002…	WO2008002905A2 | WO2008002905A3 | NO200900314A | TW200808379A | EP2037893A2 | KR2009021191A | AU2007265138A1 | CN101478956A | IN200810029P1 | CA2654986A1 | MX2008016532A | JP2009542709A | US20100003321A1 | ZA200810053A | RU2009102273A | AU2011203238A1 | NZ573295A | RU2449786C2 | US20120164218A1 | BRPI0713785A2 | CN101478956B | US8475839B2 | CN103169711A | HK1133818A1 | SG148435A1 | SG148435B | IL…	Solid dosage e.g. bilayer tablet useful for treating hypertension, congestive heart failure, angina comprises valsartan, amlodipine, hydrochlorothiazide and additives	20080103AU2007265138A1	2013-06-04 AS ASSIGNMENT NOVARTIS AG, SWITZERLAND ASSIGNMENT OF ASSIGNORS INTEREST;ASSIGNORS:CAO, YU;JOSHI, YATINDRA;LI, PING;AND OTHERS;SIGNING DATES FROM 20070607 TO 20070618;REEL/FRAME:030538/0513	NOVARTIS AG,BASEL,CH NOVARTIS AG|LICHTRASSE 35 BASEL SWITZERLAND 4056 NOVARTIS AG CAO, YU 2007-06-07 2007 JOSHI, YATINDRA 2007-06-07 2007 LI, PING 2007-06-07 2007 PUDIPEDDI, MADHUSUDHAN 2007-06-18 2007 ROYCE, ALAN EDWARD 2007-06-07 2007 WAGNER, ROBERT FRANK 2007-06-07 2007 ZHU, JIAHAO 2007-06-07 2007 030538/0513 2013-06-04 2013 ASSIGNMENT OF ASSIGNORS INTEREST (SEE DOCUMENT FOR DETAILS). CINDY KL…				27	123	US2006805883P,2006-06-27 | US2007915096A,2007-11-20 | WO2007US72097A,2007-06-26
	US8475839B2	Solid dosage forms of valsartan, amlodipine and hydrochlorothiazide and method of making the same	Monolayer, bilayer and trilayer solid dosage forms of a combination of valsartan, amlodipine and hydrochlorothiazide are made.	2012-01-03	US13342533A	US2006805883P | WO2007US72097A | US2007915096A	2006-06-27 | 2007-06-26 | 2007-06-26	2013-07-02	Novartis AG,Basel,CH | Cao Yu,Parsippany,NJ,US | Joshi Yatindra,Princeton,NJ,US | Li Ping,Basking Ridge,NJ,US | Pudipeddi Madhusudhan,Mumbai,IN | Royce Alan E,Saylorsburg,PA,US | Wagner Robert F,Hillsborough,NJ,US | Zhu Jiahao,Whippany,NJ,US	US8475839B2 | AR61627A1 | AU2007265138A1 | BRPI0713785A2 | CA2654986A1 | CL1870200700A1 | CN101478956A | CN101478956B | CN103169711A | EC2008SP8987A | EP2037893A2 | HK1133818A1 | IL195797D0 | JP2009542709A | KR2009021191A | MA30529B1 | MX2008016532A | NO200900314A | NZ573295A | PE20080991A1 | PE20120542A1 | RU2009102273A | RU2449786C2 | TW200808379A | US20100003321A1 | US20120164218A1 | WO2008002…	WO2008002905A2 | WO2008002905A3 | NO200900314A | TW200808379A | EP2037893A2 | KR2009021191A | AU2007265138A1 | CN101478956A | IN200810029P1 | CA2654986A1 | MX2008016532A | JP2009542709A | US20100003321A1 | ZA200810053A | RU2009102273A | AU2011203238A1 | NZ573295A | RU2449786C2 | US20120164218A1 | BRPI0713785A2 | CN101478956B | US8475839B2 | CN103169711A | HK1133818A1 | SG148435A1 | SG148435B | IL…	Solid dosage e.g. bilayer tablet useful for treating hypertension, congestive heart failure, angina comprises valsartan, amlodipine, hydrochlorothiazide and additives	20080103AU2007265138A1	2013-06-04 AS ASSIGNMENT NOVARTIS AG, SWITZERLAND ASSIGNMENT OF ASSIGNORS INTEREST;ASSIGNORS:CAO, YU;JOSHI, YATINDRA;LI, PING;AND OTHERS;SIGNING DATES FROM 20070607 TO 20070618;REEL/FRAME:030538/0513	NOVARTIS AG,BASEL,CH NOVARTIS AG|LICHTRASSE 35 BASEL SWITZERLAND 4056 NOVARTIS AG CAO, YU 2007-06-07 2007 JOSHI, YATINDRA 2007-06-07 2007 LI, PING 2007-06-07 2007 PUDIPEDDI, MADHUSUDHAN 2007-06-18 2007 ROYCE, ALAN EDWARD 2007-06-07 2007 WAGNER, ROBERT FRANK 2007-06-07 2007 ZHU, JIAHAO 2007-06-07 2007 030538/0513 2013-06-04 2013 ASSIGNMENT OF ASSIGNORS INTEREST (SEE DOCUMENT FOR DETAILS). CINDY KL…				27	123	US13342533A,2012-01-03 | US2006805883P,2006-06-27 | US2007915096A,2007-11-20 | WO2007US72097A,2007-06-26
	US20120071470A1	PHARMACEUTICAL COMPOSITION COMPRISING A RENIN INHIBITOR, A CALCIUM CHANNEL BLOCKER AND A DIURETIC	The invention relates to a pharmaceutical composition comprising (i) a renin inhibitor, (ii) a calcium channel blocker (CCB), and a diuretic and to a method of using such composition for the treatment of cardiovascular disease.	2011-11-30	US13307567A	US2002381546P | WO2003EP5188A | US2003514683A | US2008188604A	2002-05-17 | 2003-05-16 | 2004-11-16 | 2008-08-08	2012-03-22		US20120071470A1 | AT520417T | AU2003240669A1 | AU2003240669B2 | BR200310084A | CA2485081A1 | CA2485081C | CN1655819A | DK1507558T3 | EC2004SP5428A | EP1507558A1 | EP1507558B1 | EP1507558B8 | EP2316488A1 | ES2369216T3 | HK1074774A1 | IL164837A | IL164837D0 | JP05288678B2 | JP2005526850A | JP2010280708A | KR2005008717A | KR2010137026A | KR2013109244A | LU92000I2 | MX2004011383A | NO200405459A | NO3…	WO2003097098A1 | AU2003240669A1 | EP1507558A1 | BR200310084A | NO200405459A | KR2005008717A | US20050182042A1 | JP2005526850A | MX2004011383A | CN1655819A | ZA200408442A | NZ536555A | AU2003240669B2 | RU2316318C2 | IN200402588P4 | US20080300238A1 | MX252472B | IN224613B | JP2010280708A | KR2010137026A | EP2316488A1 | EP1507558B1 | ES2369216T3 | EP1507558B8 | US20120071470A1 | US8183295B2 | HK1074…	Composition useful for treating e.g. heart failure comprises a renin inhibitor, a calcium channel blocker and a diuretic	20031127CA2485081A1						35	91	US2002381546P,2002-05-17 | US2008188604A,2008-08-08 | US2003514683A,2004-11-16 | WO2003EP5188A,2003-05-16
	US20120004312A1	Synergistic combinations comprising a renin inhibitor for cardiovascular diseases	The invention relates to a combination comprising the renin inhibitor of formula (I) or a pharmaceutically acceptable salt thereof.	2011-09-19	US13235659A	GB200028151A | WO2001EP13241A | US2003416039A	2000-11-17 | 2001-11-15 | 2003-07-25	2012-01-05		US20120004312A1 | AT317692T | AT397445T | AU2002223680B2 | AU200223680A | BR200115411A | CA2428647A1 | CA2763223A1 | CN100404024C | CN101091703A | CN101264072A | CN101264073A | CN1474690A | CZ299749B6 | DE122009000021I1 | DE60117295D1 | DE60117295T2 | DE60134349D1 | DK1341533T3 | DK1602370T3 | DK1915993T3 | EC2003SP4603A | EP1341533A1 | EP1341533B1 | EP1602370A2 | EP1602370A3 | EP1602370B1 | EP19…	WO2002040007A1 | AU200223680A | NO200302233A | CZ200301341A3 | EP1341533A1 | HU200301841A2 | KR2003051753A | SK200300584A3 | CN1474690A | JP2004513920A | ZA200303497A | BR200115411A | MX2003004358A | NZ525795A | AU2002223680B2 | IN200300724P4 | EP1602370A2 | EP1341533B1 | DE60117295D1 | ES2256335T3 | DE60117295T2 | MX239582B | NZ537691A | SG135969A1 | RU2310443C2 | NZ550897A | CN101091703A | EP19…	Synergistic composition comprises renin inhibitor and active agent e.g. angiotensin converting enzyme inhibitor for the treatment of e.g. hypertension	20010103GB200028151D0	2015-04-03 AS ASSIGNMENT NOVARTIS AG, SWITZERLAND ASSIGNMENT OF ASSIGNORS INTEREST;ASSIGNORS:HEWITT, WILLIAM;VASELLA, DANIEL LUCIUS;WEBB, RANDY LEE;SIGNING DATES FROM 20030513 TO 20030710;REEL/FRAME:035328/0383	NOVARTIS AG,BASEL,CH NOVARTIS AG|LICHTSTRASSE 35 BASEL SWITZERLAND 4056 NOVARTIS AG HEWITT, WILLIAM 2003-07-10 2003 VASELLA, DANIEL LUCIUS 2003-05-13 2003 WEBB, RANDY LEE 2003-06-27 2003 035328/0383 2015-04-03 2015 ASSIGNMENT OF ASSIGNORS INTEREST (SEE DOCUMENT FOR DETAILS). JIM LYNCH NOVARTIS PHARMACEUTICALS CORPORATION ONE HEALTH PLAZA, BLDG 433 EAST HANOVER, NJ 07936				78	88	US2003416039A,2003-07-25 | WO2001EP13241A,2001-11-15
	US20120010295A1	Synergistic combinations comprising a renin inhibitor for cardiovascular diseases	The invention relates to a combination comprising the renin inhibitor of formula (I) or a pharmaceutically acceptable salt thereof.	2011-09-19	US13235787A	GB200028151A | WO2001EP13241A | US2003416039A	2000-11-17 | 2001-11-15 | 2003-07-25	2012-01-12		US20120010295A1 | AT317692T | AT397445T | AU2002223680B2 | AU200223680A | BR200115411A | CA2428647A1 | CA2763223A1 | CN100404024C | CN101091703A | CN101264072A | CN101264073A | CN1474690A | CZ299749B6 | DE122009000021I1 | DE60117295D1 | DE60117295T2 | DE60134349D1 | DK1341533T3 | DK1602370T3 | DK1915993T3 | EC2003SP4603A | EP1341533A1 | EP1341533B1 | EP1602370A2 | EP1602370A3 | EP1602370B1 | EP19…	WO2002040007A1 | AU200223680A | NO200302233A | CZ200301341A3 | EP1341533A1 | HU200301841A2 | KR2003051753A | SK200300584A3 | CN1474690A | JP2004513920A | ZA200303497A | BR200115411A | MX2003004358A | NZ525795A | AU2002223680B2 | IN200300724P4 | EP1602370A2 | EP1341533B1 | DE60117295D1 | ES2256335T3 | DE60117295T2 | MX239582B | NZ537691A | SG135969A1 | RU2310443C2 | NZ550897A | CN101091703A | EP19…	Synergistic composition comprises renin inhibitor and active agent e.g. angiotensin converting enzyme inhibitor for the treatment of e.g. hypertension	20010103GB200028151D0						78	88	US2003416039A,2003-07-25 | WO2001EP13241A,2001-11-15
	US20120016035A1	Synergistic combinations comprising a renin inhibitor for cardiovascular diseases	The invention relates to a combination comprising the renin inhibitor of formula (I) or a pharmaceutically acceptable salt thereof.	2011-09-19	US13235758A	GB200028151A | WO2001EP13241A | US2003416039A	2000-11-17 | 2001-11-15 | 2003-07-25	2012-01-19		US20120016035A1 | AT317692T | AT397445T | AU2002223680B2 | AU200223680A | BR200115411A | CA2428647A1 | CA2763223A1 | CN100404024C | CN101091703A | CN101264072A | CN101264073A | CN1474690A | CZ299749B6 | DE122009000021I1 | DE60117295D1 | DE60117295T2 | DE60134349D1 | DK1341533T3 | DK1602370T3 | DK1915993T3 | EC2003SP4603A | EP1341533A1 | EP1341533B1 | EP1602370A2 | EP1602370A3 | EP1602370B1 | EP19…	WO2002040007A1 | AU200223680A | NO200302233A | CZ200301341A3 | EP1341533A1 | HU200301841A2 | KR2003051753A | SK200300584A3 | CN1474690A | JP2004513920A | ZA200303497A | BR200115411A | MX2003004358A | NZ525795A | AU2002223680B2 | IN200300724P4 | EP1602370A2 | EP1341533B1 | DE60117295D1 | ES2256335T3 | DE60117295T2 | MX239582B | NZ537691A | SG135969A1 | RU2310443C2 | NZ550897A | CN101091703A | EP19…	Synergistic composition comprises renin inhibitor and active agent e.g. angiotensin converting enzyme inhibitor for the treatment of e.g. hypertension	20010103GB200028151D0	2015-04-03 AS ASSIGNMENT NOVARTIS AG, SWITZERLAND ASSIGNMENT OF ASSIGNORS INTEREST;ASSIGNORS:HEWITT, WILLIAM;VASELLA, DANIEL LUCIUS;WEBB, RANDY LEE;SIGNING DATES FROM 20030513 TO 20030710;REEL/FRAME:035328/0383	NOVARTIS AG,BASEL,CH NOVARTIS AG|LICHTSTRASSE 35 BASEL SWITZERLAND 4056 NOVARTIS AG HEWITT, WILLIAM 2003-07-10 2003 VASELLA, DANIEL LUCIUS 2003-05-13 2003 WEBB, RANDY LEE 2003-06-27 2003 035328/0383 2015-04-03 2015 ASSIGNMENT OF ASSIGNORS INTEREST (SEE DOCUMENT FOR DETAILS). JIM LYNCH NOVARTIS PHARMACEUTICALS CORPORATION ONE HEALTH PLAZA, BLDG 433 EAST HANOVER, NJ 07936				78	88	US2003416039A,2003-07-25 | WO2001EP13241A,2001-11-15
	US8618174B2	Synergistic combinations comprising a renin inhibitor for cardiovascular diseases	The invention relates to a combination comprising the renin inhibitor of formula (I) or a pharmaceutically acceptable salt thereof.	2011-09-19	US13235787A	GB200028151A | WO2001EP13241A | US2003416039A	2000-11-17 | 2001-11-15 | 2003-07-25	2013-12-31	Novartis AG,Basel,CH | Hewitt William,Pottstown,PA,US | Vasella Daniel L,Basel,CH | Webb Randy L,Flemington,NJ,US	US8618174B2 | AT317692T | AT397445T | AU2002223680B2 | AU200223680A | BR200115411A | CA2428647A1 | CA2763223A1 | CN100404024C | CN101091703A | CN101264072A | CN101264073A | CN1474690A | CZ299749B6 | DE122009000021I1 | DE60117295D1 | DE60117295T2 | DE60134349D1 | DK1341533T3 | DK1602370T3 | DK1915993T3 | EC2003SP4603A | EP1341533A1 | EP1341533B1 | EP1602370A2 | EP1602370A3 | EP1602370B1 | EP191599…	WO2002040007A1 | AU200223680A | NO200302233A | CZ200301341A3 | EP1341533A1 | HU200301841A2 | KR2003051753A | SK200300584A3 | CN1474690A | JP2004513920A | ZA200303497A | BR200115411A | MX2003004358A | NZ525795A | AU2002223680B2 | IN200300724P4 | EP1602370A2 | EP1341533B1 | DE60117295D1 | ES2256335T3 | DE60117295T2 | MX239582B | NZ537691A | SG135969A1 | RU2310443C2 | NZ550897A | CN101091703A | EP19…	Synergistic composition comprises renin inhibitor and active agent e.g. angiotensin converting enzyme inhibitor for the treatment of e.g. hypertension	20010103GB200028151D0						78	88	US13235787A,2011-09-19 | US2003416039A,2003-07-25 | WO2001EP13241A,2001-11-15
	US20110201654A1	THERAPEUTIC COMBINATION	This invention relates to pharmaceutical combinations of amlodipine or a pharmaceutically acceptable acid addition salt thereof and atorvastatin or a pharmaceutically acceptable salt thereof, kits containing such combinations and methods of using such combinations to treat subjects suffering from angina pectoris, atherosclerosis, combined hypertension and hyperlipidemia and to treat subjects pres…	2011-04-21	US13091622A	US199757275P | WO1998IB1225A | US2000512914A | US2002214058A | US2006448100A	1997-08-29 | 1998-08-11 | 2000-02-25 | 2002-08-07 | 2006-06-07	2011-08-18		US20110201654A1 | AP1225A | AP199801334D0 | AR12269A1 | AT277615T | AT332689T | AU199885548A | AU755636B2 | BG104177A | BG64665B1 | BR199812030A | CA2301732A1 | CA2301732C | CN101062035A | CN1268052A | CO4970694A1 | CZ200000511A3 | CZ301081B6 | DE69826683D1 | DE69826683T2 | DE69835245D1 | DE69835245T2 | DK1003503T3 | DK1491193T3 | DZ2596A1 | EA3549B1 | EP1003503A1 | EP1003503B1 | EP1468682A1 | EP…	WO1999011259A1 | AU199885548A | ZA199807844A | NO200000998A | EP1003503A1 | CZ200000511A3 | BR199812030A | CN1268052A | SK200000204A3 | HU200003656A2 | KR2001023498A | JP2001514222A | MX2000002087A | US6455574B1 | US20030008904A1 | AU755636B | NZ516818A | US20040048906A1 | JP2004210797A | EP1003503B1 | EP1468682A1 | DE69826683D1 | EP1491193A1 | TW592696B | CA2301732C | NZ527158A | ES2227865T3 | D…	Use of a synergistic combination of amlodipine and atorvastatin for treating angina pectoris and atherosclerosis	19980930AP199801334D0						51	85	US2006448100A,2006-06-07 | US2002214058A,2002-08-07 | US2000512914A,2000-02-25
	US20110190277A1	PHARMACEUTICAL COMBINATION FOR THE PREVENTION OR TREATMENT OF CARDIOVASCULAR, CARDIOPULMONARY, PULMONARY OR RENAL DISEASES	A method for the prevention or treatment of a cardiovascular, cardiopulmonary, or renal disease or condition in a human or mammal patient, the method comprising administering to the patient in need thereof an effective amount of: (a) telmisartan or a polymorph or salt thereof; and (b) simvastatin.	2011-04-13	US13086131A	DE10301372A | US2003446437P | DE10335027A | US2003503317P | US2004757015A	2003-01-16 | 2003-02-11 | 2003-07-31 | 2003-09-16 | 2004-01-14	2011-08-04	BOEHRINGER INGELHEIM INTERNATIONAL GMBH,Ingelheim am Rheim,DE	US20110190277A1 | AT362782T | AT443519T | AT536871T | AU2004204352A1 | AU2004204352B2 | AU2004204353A1 | AU2004260606A1 | AU2004260606B2 | BR200406455A | BR200406812A | BR200413165A | CA2513277A1 | CA2513281A1 | CA2513281C | CA2534006A1 | CA2534006C | CN101926997A | CN102139110A | CN1738617A | CN1738665A | CN1829511A | CN1829511B | CY1109560T1 | DE10301371A1 | DE10301372A1 | DE10335027A1 | DE1034…	WO2004062729A1 | US20040259925A1 | US20050004193A1 | DE10335027A1 | NO200503793A | AU2004204353A1 | EP1587584A1 | BR200406812A | MX2005007559A | JP2006515877A | CN1738665A | ZA200503809A | KR2005092119A | IN200503101P1 | EP1587584B1 | DE502004003880D1 | EP1818056A1 | IN200600492P1 | ES2287689T3 | MX253927B | US20110190277A1 | CN102139110A | CA2513281C | HK1151976A0 | HK1093305A1 | SG113353B	Use of telmisartan and simvastatin for treatment or prophylaxis of cardiovascular, cardiopulmonary and renal diseases e.g. hypertension combined with hyperlipidemia or atherosclerosis	20040729AU2004204352A1						26	108	US2003446437P,2003-02-11 | US2003503317P,2003-09-16 | US2004757015A,2004-01-14
	US20110165240A1	GALENICAL FORMULATIONS OF ORGANIC COMPOUNDS	The present invention relates to a pharmaceutical oral fixed dose combination comprising * a) a therapeutically effective amount of Aliskiren, or a pharmaceutically acceptable salt thereof, * b) a therapeutically effective amount of Amlodipine, or a pharmaceutically acceptable salt thereof, wherein the pharmaceutical oral fixed dose combination shows an in vitro dissolution of component (a) of 60…	2011-03-15	US13063955A	US200898945P | WO2009US57750A	2008-09-22 | 2009-09-22	2011-07-07		US20110165240A1 | AR73384A1 | AU2009292908A1 | AU2009292908B2 | CA2736257A1 | CN102159195A | CO6351711A2 | EC2011SP010999A | EP2328564A2 | IL211571D0 | JP2012503020A | KR2011060942A | MA32719B1 | MX2011002988A | PE20110293A1 | RU2011115712A | TW201016217A | US8613949B2 | WO2010033954A2 | WO2010033954A3	WO2010033954A2 | WO2010033954A3 | AU2009292908A1 | TW201016217A | CA2736257A1 | EP2328564A2 | MX2011002988A | KR2011060942A | US20110165240A1 | CN102159195A | ZA201101644A | JP2012503020A | HK1156228A0 | AU2009292908B2 | RU2011115712A | US8613949B2 | SG169467A1 | SG169467B | MX323962B | IL211571A	Oral fixed dose combination, useful for the treatment of e.g. hypertension and atherosclerosis, comprises aliskiren or its hemi-fumarate salt and amlodipine or its besylate salt	20100325AU2009292908A1	2011-03-17 AS ASSIGNMENT NOVARTIS AG, SWITZERLAND ASSIGNMENT OF ASSIGNORS INTEREST;ASSIGNORS:VALAZZA, STEPHEN;WAGNER, ROBERT FRANK;VIPPAGUNTA, SUDHA;REEL/FRAME:025973/0991 2009-09-09	NOVARTIS AG,BASEL,CH NOVARTIS AG|LICHSTRASSE 35 BASEL SWITZERLAND 4056 NOVARTIS AG VALAZZA, STEPHEN 2009-09-09 2009 WAGNER, ROBERT FRANK 2009-09-09 2009 VIPPAGUNTA, SUDHA 2009-09-09 2009 025973/0991 2011-03-17 2011 ASSIGNMENT OF ASSIGNORS INTEREST (SEE DOCUMENT FOR DETAILS). CINDY KLEPACKY ONE HEALTH PLAZA EAST HANOVER, NJ 07936				20	127	US200898945P,2008-09-22
	US8613949B2	Galenical formulations of organic compounds	The present invention relates to a pharmaceutical oral fixed dose combination comprising * a) a therapeutically effective amount of Aliskiren, or a pharmaceutically acceptable salt thereof, * b) a therapeutically effective amount of Amlodipine, or a pharmaceutically acceptable salt thereof, wherein the pharmaceutical oral fixed dose combination shows an in vitro dissolution of component (a) of 60…	2011-03-15	US13063955A	US200898945P | WO2009US57750A	2008-09-22 | 2009-09-22	2013-12-24	Novartis AG,Basel,CH | Valazza Stephen,Matawan,NJ,US | Wagner Robert F,Hillsborough,NJ,US | Vippagunta Sudha,Morris Plains,NJ,US	US8613949B2 | AR73384A1 | AU2009292908A1 | AU2009292908B2 | CA2736257A1 | CN102159195A | CO6351711A2 | EC2011SP010999A | EP2328564A2 | IL211571D0 | JP2012503020A | KR2011060942A | MA32719B1 | MX2011002988A | PE20110293A1 | RU2011115712A | TW201016217A | US20110165240A1 | WO2010033954A2 | WO2010033954A3	WO2010033954A2 | WO2010033954A3 | AU2009292908A1 | TW201016217A | CA2736257A1 | EP2328564A2 | MX2011002988A | KR2011060942A | US20110165240A1 | CN102159195A | ZA201101644A | JP2012503020A | HK1156228A0 | AU2009292908B2 | RU2011115712A | US8613949B2 | SG169467A1 | SG169467B | MX323962B | IL211571A	Oral fixed dose combination, useful for the treatment of e.g. hypertension and atherosclerosis, comprises aliskiren or its hemi-fumarate salt and amlodipine or its besylate salt	20100325AU2009292908A1	2011-03-17 AS ASSIGNMENT NOVARTIS AG, SWITZERLAND ASSIGNMENT OF ASSIGNORS INTEREST;ASSIGNORS:VALAZZA, STEPHEN;WAGNER, ROBERT FRANK;VIPPAGUNTA, SUDHA;REEL/FRAME:025973/0991 2009-09-09	NOVARTIS AG,BASEL,CH NOVARTIS AG|LICHSTRASSE 35 BASEL SWITZERLAND 4056 NOVARTIS AG VALAZZA, STEPHEN 2009-09-09 2009 WAGNER, ROBERT FRANK 2009-09-09 2009 VIPPAGUNTA, SUDHA 2009-09-09 2009 025973/0991 2011-03-17 2011 ASSIGNMENT OF ASSIGNORS INTEREST (SEE DOCUMENT FOR DETAILS). CINDY KLEPACKY ONE HEALTH PLAZA EAST HANOVER, NJ 07936				20	127	US13063955A,2011-03-15 | US200898945P,2008-09-22
	US20100168187A1	THERAPEUTIC COMBINATION	This invention relates to pharmaceutical combinations of amlodipine or a pharmaceutically acceptable acid addition salt thereof and atorvastatin or a pharmaceutically acceptable salt thereof, kits containing such combinations and methods of using such combinations to treat subjects suffering from angina pectoris, atherosclerosis, combined hypertension and hyperlipidemia and to treat subjects pres…	2010-03-10	US2010721065A	US199757275P | WO1998IB1225A | US2000512914A | US2002214058A | US2006499753A | US2009427420A	1997-08-29 | 1998-08-11 | 2000-02-25 | 2002-08-07 | 2006-08-07 | 2009-04-21	2010-07-01		US20100168187A1 | AP1225A | AP199801334D0 | AR12269A1 | AT277615T | AT332689T | AU199885548A | AU755636B2 | BG104177A | BG64665B1 | BR199812030A | CA2301732A1 | CA2301732C | CN101062035A | CN1268052A | CO4970694A1 | CZ200000511A3 | CZ301081B6 | DE69826683D1 | DE69826683T2 | DE69835245D1 | DE69835245T2 | DK1003503T3 | DK1491193T3 | DZ2596A1 | EA3549B1 | EP1003503A1 | EP1003503B1 | EP1468682A1 | EP…	WO1999011259A1 | AU199885548A | ZA199807844A | NO200000998A | EP1003503A1 | CZ200000511A3 | BR199812030A | CN1268052A | SK200000204A3 | HU200003656A2 | KR2001023498A | JP2001514222A | MX2000002087A | US6455574B1 | US20030008904A1 | AU755636B | NZ516818A | US20040048906A1 | JP2004210797A | EP1003503B1 | EP1468682A1 | DE69826683D1 | EP1491193A1 | TW592696B | CA2301732C | NZ527158A | ES2227865T3 | D…	Use of a synergistic combination of amlodipine and atorvastatin for treating angina pectoris and atherosclerosis	19980930AP199801334D0						51	85	US199757275P,1997-08-29 | US2009427420A,2009-04-21 | US2006499753A,2006-08-07 | US2002214058A,2002-08-07 | US2000512914A,2000-02-25 | WO1998IB1225A,1998-08-11
	CA2736257A1	GALENICAL FORMULATIONS OF ORGANIC COMPOUNDS | FORMULATIONS GALENIQUES DE COMPOSES ORGANIQUES	The present invention relates to a pharmaceutical oral fixed dose combination comprising a) a therapeutically effective amount of Aliskiren, or a pharmaceutically acceptable salt thereof, b) a therapeutically effective amount of Amlodipine, or a pharmaceutically acceptable salt thereof, wherein the pharmaceutical oral fixed dose combination shows an in vitro dissolution of component (a) of 60% or…	2009-09-22	CA2736257A	US200898945P | WO2009US57750A	2008-09-22 | 2009-09-22	2010-03-25	NOVARTIS AG,BASEL,CH	CA2736257A1 | AR73384A1 | AU2009292908A1 | AU2009292908B2 | CN102159195A | CO6351711A2 | EC2011SP010999A | EP2328564A2 | IL211571D0 | JP2012503020A | KR2011060942A | MA32719B1 | MX2011002988A | PE20110293A1 | RU2011115712A | TW201016217A | US20110165240A1 | US8613949B2 | WO2010033954A2 | WO2010033954A3	WO2010033954A2 | WO2010033954A3 | AU2009292908A1 | TW201016217A | CA2736257A1 | EP2328564A2 | MX2011002988A | KR2011060942A | US20110165240A1 | CN102159195A | ZA201101644A | JP2012503020A | HK1156228A0 | AU2009292908B2 | RU2011115712A | US8613949B2 | SG169467A1 | SG169467B | MX323962B | IL211571A	Oral fixed dose combination, useful for the treatment of e.g. hypertension and atherosclerosis, comprises aliskiren or its hemi-fumarate salt and amlodipine or its besylate salt	20100325AU2009292908A1						20	127	CA2736257A,2009-09-22
	US20090297598A1	THERAPEUTIC COMBINATION	This invention relates to pharmaceutical combinations of amlodipine or a pharmaceutically acceptable acid addition salt thereof and atorvastatin or a pharmaceutically acceptable salt thereof, kits containing such combinations and methods of using such combinations to treat subjects suffering from angina pectoris, atherosclerosis, combined hypertension and hyperlipidemia and to treat subjects pres…	2009-04-21	US2009427420A	US199757275P | WO1998IB1225A | US2000512914A | US2002214058A | US2006499753A	1997-08-29 | 1998-08-11 | 2000-02-25 | 2002-08-07 | 2006-08-07	2009-12-03		US20090297598A1 | AP1225A | AP199801334D0 | AR12269A1 | AT277615T | AT332689T | AU199885548A | AU755636B2 | BG104177A | BG64665B1 | BR199812030A | CA2301732A1 | CA2301732C | CN101062035A | CN1268052A | CO4970694A1 | CZ200000511A3 | CZ301081B6 | DE69826683D1 | DE69826683T2 | DE69835245D1 | DE69835245T2 | DK1003503T3 | DK1491193T3 | DZ2596A1 | EA3549B1 | EP1003503A1 | EP1003503B1 | EP1468682A1 | EP…	WO1999011259A1 | AU199885548A | ZA199807844A | NO200000998A | EP1003503A1 | CZ200000511A3 | BR199812030A | CN1268052A | SK200000204A3 | HU200003656A2 | KR2001023498A | JP2001514222A | MX2000002087A | US6455574B1 | US20030008904A1 | AU755636B | NZ516818A | US20040048906A1 | JP2004210797A | EP1003503B1 | EP1468682A1 | DE69826683D1 | EP1491193A1 | TW592696B | CA2301732C | NZ527158A | ES2227865T3 | D…	Use of a synergistic combination of amlodipine and atorvastatin for treating angina pectoris and atherosclerosis	19980930AP199801334D0						51	85	US199757275P,1997-08-29 | US2006499753A,2006-08-07 | US2002214058A,2002-08-07 | US2000512914A,2000-02-25 | WO1998IB1225A,1998-08-11
	US20090099241A1	PHARMACEUTICAL COMPOSITION CONTAINING ANTIHYPERTENSIVE AGENTS	The present invention relates to a combination of organic compounds, a pharmaceutical composition and a kit of parts comprising said combination of organic compounds and to a method of treatment or prevention of certain conditions or diseases.	2008-12-18	US2008338066A	US2002381547P | WO2003EP5180A | US2003514682A	2002-05-17 | 2003-05-16 | 2005-01-07	2009-04-16		US20090099241A1 | AR40014A1 | AT429223T | AU2003240261A1 | AU2003240261B2 | BR200310092A | CA2486144A1 | CA2486144C | CN101890166A | CN1652777A | CY1109240T1 | DE60327316D1 | DK1507529T3 | EC2004SP5429A | EG24716A | EP1507529A1 | EP1507529B1 | EP1507529B8 | ES2325207T3 | HK1074773A1 | IL164925A | IL164925D0 | JP05132872B2 | JP2005533023A | JP2010209123A | KR1454070B1 | KR2005000546A | KR201110787…	WO2003097045A1 | AU2003240261A1 | EP1507529A1 | BR200310092A | NO200405429A | KR2005000546A | US20050222137A1 | MX2004011385A | TW200406204A | CN1652777A | JP2005533023A | ZA200408737A | NZ536557A | AU2003240261B2 | IN200402587P4 | RU2324482C2 | US20090099241A1 | EP1507529B1 | DE60327316D1 | ES2325207T3 | IN223313B | MX267988B | EP1507529B8 | JP2010209123A | CN101890166A | KR2011107877A | US81015…	Composition, useful for the treatment of e.g. hypertension and heart diseases, comprises an angiotensin receptor blocker, calcium channel blocker and a diuretic	20031127CA2486144A1	2011-03-23 AS ASSIGNMENT NOVARTIS PHARMACEUTICALS CORPORATION, NEW JERSEY ASSIGNMENT OF ASSIGNORS INTEREST;ASSIGNOR:NOVARTIS AG;REEL/FRAME:026002/0790 2011-03-17 | 2010-09-23 AS ASSIGNMENT NOVARTIS AG, NEW JERSEY ASSIGNMENT OF ASSIGNORS INTEREST;ASSIGNORS:SHETTY, SURAJ SHIVAPPA;WEBB, RANDY LEE;SIGNING DATES FROM 20041026 TO 20041215;REEL/FRAME:025032/0186	NOVARTIS PHARMACEUTICALS CORPORATION,EAST HANOVER,NJ,US NOVARTIS PHARMACEUTICALS CORPORATION|ONE HEALTH PLAZA EAST HANOVER NEW JERSEY 07936 NOVARTIS PHARMACEUTICALS CORPORATION NOVARTIS AG 2011-03-17 2011 026002/0790 2011-03-23 2011 ASSIGNMENT OF ASSIGNORS INTEREST (SEE DOCUMENT FOR DETAILS). LINDA ADAMS NOVARTIS PHARMACEUTICALS CORP. ONE HEALTH PLAZA EAST HANOVER, NJ 07936 | NOVARTIS AG,EAST HAN…				37	93	US2003514682A,2005-01-07 | WO2003EP5180A,2003-05-16
	US8101599B2	Pharmaceutical composition containing anti-hypertensive agents	The present invention relates to a combination of organic compounds, a pharmaceutical composition and a kit of parts comprising said combination of organic compounds and to a method of treatment or prevention of certain conditions or diseases.	2008-12-18	US2008338066A	US2002381547P | WO2003EP5180A | US2003514682A	2002-05-17 | 2003-05-16 | 2005-01-07	2012-01-24	Novartis AG,Basel,CH	US8101599B2 | AR40014A1 | AT429223T | AU2003240261A1 | AU2003240261B2 | BR200310092A | CA2486144A1 | CA2486144C | CN101890166A | CN1652777A | CY1109240T1 | DE60327316D1 | DK1507529T3 | EC2004SP5429A | EG24716A | EP1507529A1 | EP1507529B1 | EP1507529B8 | ES2325207T3 | HK1074773A1 | IL164925A | IL164925D0 | JP05132872B2 | JP2005533023A | JP2010209123A | KR1454070B1 | KR2005000546A | KR2011107877A |…	WO2003097045A1 | AU2003240261A1 | EP1507529A1 | BR200310092A | NO200405429A | KR2005000546A | US20050222137A1 | MX2004011385A | TW200406204A | CN1652777A | JP2005533023A | ZA200408737A | NZ536557A | AU2003240261B2 | IN200402587P4 | RU2324482C2 | US20090099241A1 | EP1507529B1 | DE60327316D1 | ES2325207T3 | IN223313B | MX267988B | EP1507529B8 | JP2010209123A | CN101890166A | KR2011107877A | US81015…	Composition, useful for the treatment of e.g. hypertension and heart diseases, comprises an angiotensin receptor blocker, calcium channel blocker and a diuretic	20031127CA2486144A1	2011-03-23 AS ASSIGNMENT NOVARTIS PHARMACEUTICALS CORPORATION, NEW JERSEY ASSIGNMENT OF ASSIGNORS INTEREST;ASSIGNOR:NOVARTIS AG;REEL/FRAME:026002/0790 2011-03-17 | 2010-09-23 AS ASSIGNMENT NOVARTIS AG, NEW JERSEY ASSIGNMENT OF ASSIGNORS INTEREST;ASSIGNORS:SHETTY, SURAJ SHIVAPPA;WEBB, RANDY LEE;SIGNING DATES FROM 20041026 TO 20041215;REEL/FRAME:025032/0186	NOVARTIS PHARMACEUTICALS CORPORATION,EAST HANOVER,NJ,US NOVARTIS PHARMACEUTICALS CORPORATION|ONE HEALTH PLAZA EAST HANOVER NEW JERSEY 07936 NOVARTIS PHARMACEUTICALS CORPORATION NOVARTIS AG 2011-03-17 2011 026002/0790 2011-03-23 2011 ASSIGNMENT OF ASSIGNORS INTEREST (SEE DOCUMENT FOR DETAILS). LINDA ADAMS NOVARTIS PHARMACEUTICALS CORP. ONE HEALTH PLAZA EAST HANOVER, NJ 07936 | NOVARTIS AG,EAST HAN…				37	93	US2008338066A,2008-12-18 | US2002381547P,2002-05-17 | US2003514682A,2005-01-07 | WO2003EP5180A,2003-05-16
	US20080300238A1	PHARMACEUTICAL COMPOSITION COMPRISING A RENIN INHIBITOR, A CALCIUM CHANNEL BLOCKER AND A DIURETIC	The invention relates to a pharmaceutical composition comprising (i) a renin inhibitor, (ii) a calcium channel blocker (CCB), and a diuretic and to a method of using such composition for the treatment of cardiovascular disease.	2008-08-08	US2008188604A	US2002381546P | WO2003EP5188A | US2003514683A	2002-05-17 | 2003-05-16 | 2004-11-16	2008-12-04		US20080300238A1 | AT520417T | AU2003240669A1 | AU2003240669B2 | BR200310084A | CA2485081A1 | CA2485081C | CN1655819A | DK1507558T3 | EC2004SP5428A | EP1507558A1 | EP1507558B1 | EP1507558B8 | EP2316488A1 | ES2369216T3 | HK1074774A1 | IL164837A | IL164837D0 | JP05288678B2 | JP2005526850A | JP2010280708A | KR2005008717A | KR2010137026A | KR2013109244A | LU92000I2 | MX2004011383A | NO200405459A | NO3…	WO2003097098A1 | AU2003240669A1 | EP1507558A1 | BR200310084A | NO200405459A | KR2005008717A | US20050182042A1 | JP2005526850A | MX2004011383A | CN1655819A | ZA200408442A | NZ536555A | AU2003240669B2 | RU2316318C2 | IN200402588P4 | US20080300238A1 | MX252472B | IN224613B | JP2010280708A | KR2010137026A | EP2316488A1 | EP1507558B1 | ES2369216T3 | EP1507558B8 | US20120071470A1 | US8183295B2 | HK1074…	Composition useful for treating e.g. heart failure comprises a renin inhibitor, a calcium channel blocker and a diuretic	20031127CA2485081A1	2011-03-23 AS ASSIGNMENT NOVARTIS PHARMACEUTICALS CORPORATION, NEW JERSEY ASSIGNMENT OF ASSIGNORS INTEREST;ASSIGNOR:NOVARTIS AG;REEL/FRAME:026002/0790 2011-03-17 | 2010-09-23 AS ASSIGNMENT NOVARTIS AG, SWITZERLAND ASSIGNMENT OF ASSIGNORS INTEREST;ASSIGNORS:FELDMAN, DAVID LOUIS;WEBB, RANDY LEE;REEL/FRAME:025032/0365 2004-10-26	NOVARTIS PHARMACEUTICALS CORPORATION,EAST HANOVER,NJ,US NOVARTIS PHARMACEUTICALS CORPORATION|ONE HEALTH PLAZA EAST HANOVER NEW JERSEY 07936 NOVARTIS PHARMACEUTICALS CORPORATION NOVARTIS AG 2011-03-17 2011 026002/0790 2011-03-23 2011 ASSIGNMENT OF ASSIGNORS INTEREST (SEE DOCUMENT FOR DETAILS). LINDA ADAMS NOVARTIS PHARMACEUTICALS CORP. ONE HEALTH PLAZA EAST HANOVER, NJ 07936 | NOVARTIS AG,BASEL,CH…				35	91	US2002381546P,2002-05-17 | US2003514683A,2004-11-16 | WO2003EP5188A,2003-05-16
	US8183295B2	Pharmaceutical composition comprising a renin inhibitor, a calcium channel blocker and a diuretic	The invention relates to a pharmaceutical composition comprising (i) a renin inhibitor, (ii) a calcium channel blocker (CCB), and a diuretic and to a method of using such composition for the treatment of cardiovascular disease.	2008-08-08	US2008188604A	US2002381546P | WO2003EP5188A | US2003514683A	2002-05-17 | 2003-05-16 | 2004-11-16	2012-05-22	Novartis Pharmaceuticals Corporation,East Hanover,NJ,US	US8183295B2 | AT520417T | AU2003240669A1 | AU2003240669B2 | BR200310084A | CA2485081A1 | CA2485081C | CN1655819A | DK1507558T3 | EC2004SP5428A | EP1507558A1 | EP1507558B1 | EP1507558B8 | EP2316488A1 | ES2369216T3 | HK1074774A1 | IL164837A | IL164837D0 | JP05288678B2 | JP2005526850A | JP2010280708A | KR2005008717A | KR2010137026A | KR2013109244A | LU92000I2 | MX2004011383A | NO200405459A | NO33438…	WO2003097098A1 | AU2003240669A1 | EP1507558A1 | BR200310084A | NO200405459A | KR2005008717A | US20050182042A1 | JP2005526850A | MX2004011383A | CN1655819A | ZA200408442A | NZ536555A | AU2003240669B2 | RU2316318C2 | IN200402588P4 | US20080300238A1 | MX252472B | IN224613B | JP2010280708A | KR2010137026A | EP2316488A1 | EP1507558B1 | ES2369216T3 | EP1507558B8 | US20120071470A1 | US8183295B2 | HK1074…	Composition useful for treating e.g. heart failure comprises a renin inhibitor, a calcium channel blocker and a diuretic	20031127CA2485081A1	2011-03-23 AS ASSIGNMENT NOVARTIS PHARMACEUTICALS CORPORATION, NEW JERSEY ASSIGNMENT OF ASSIGNORS INTEREST;ASSIGNOR:NOVARTIS AG;REEL/FRAME:026002/0790 2011-03-17 | 2010-09-23 AS ASSIGNMENT NOVARTIS AG, SWITZERLAND ASSIGNMENT OF ASSIGNORS INTEREST;ASSIGNORS:FELDMAN, DAVID LOUIS;WEBB, RANDY LEE;REEL/FRAME:025032/0365 2004-10-26	NOVARTIS PHARMACEUTICALS CORPORATION,EAST HANOVER,NJ,US NOVARTIS PHARMACEUTICALS CORPORATION|ONE HEALTH PLAZA EAST HANOVER NEW JERSEY 07936 NOVARTIS PHARMACEUTICALS CORPORATION NOVARTIS AG 2011-03-17 2011 026002/0790 2011-03-23 2011 ASSIGNMENT OF ASSIGNORS INTEREST (SEE DOCUMENT FOR DETAILS). LINDA ADAMS NOVARTIS PHARMACEUTICALS CORP. ONE HEALTH PLAZA EAST HANOVER, NJ 07936 | NOVARTIS AG,BASEL,CH…				35	91	US2002381546P,2002-05-17 | US2008188604A,2008-08-08 | US2003514683A,2004-11-16 | WO2003EP5188A,2003-05-16
	US20100003321A1	SOLID DOSAGE FORMS OF VALSARTAN, AMLODIPINE AND HYDROCHLOROTHIAZIDE AND METHOD OF MAKING THE SAME	Monolayer, bilayer and trilayer solid dosage forms of a combination of valsartan, amlodipine and hydrochlorothiazide are made.	2007-11-20	US2007915096A	US2006805883P | WO2007US72097A	2006-06-27 | 2007-06-26	2010-01-07		US20100003321A1 | AR61627A1 | AU2007265138A1 | BRPI0713785A2 | CA2654986A1 | CL1870200700A1 | CN101478956A | CN101478956B | CN103169711A | EC2008SP8987A | EP2037893A2 | HK1133818A1 | IL195797D0 | JP2009542709A | KR2009021191A | MA30529B1 | MX2008016532A | NO200900314A | NZ573295A | PE20080991A1 | PE20120542A1 | RU2009102273A | RU2449786C2 | TW200808379A | US20120164218A1 | US8475839B2 | WO2008002…	WO2008002905A2 | WO2008002905A3 | NO200900314A | TW200808379A | EP2037893A2 | KR2009021191A | AU2007265138A1 | CN101478956A | IN200810029P1 | CA2654986A1 | MX2008016532A | JP2009542709A | US20100003321A1 | ZA200810053A | RU2009102273A | AU2011203238A1 | NZ573295A | RU2449786C2 | US20120164218A1 | BRPI0713785A2 | CN101478956B | US8475839B2 | CN103169711A | HK1133818A1 | SG148435A1 | SG148435B | IL…	Solid dosage e.g. bilayer tablet useful for treating hypertension, congestive heart failure, angina comprises valsartan, amlodipine, hydrochlorothiazide and additives	20080103AU2007265138A1	2011-03-23 AS ASSIGNMENT NOVARTIS PHARMACEUTICALS CORPORATION, NEW JERSEY ASSIGNMENT OF ASSIGNORS INTEREST;ASSIGNOR:NOVARTIS AG;REEL/FRAME:026002/0790 2011-03-17 | 2010-09-24 AS ASSIGNMENT NOVARTIS AG, SWITZERLAND ASSIGNMENT OF ASSIGNORS INTEREST;ASSIGNORS:CAO, YU;JOSHI, YATINDRA;LI, PING;AND OTHERS;SIGNING DATES FROM 20070607 TO 20100607;REEL/FRAME:025042/0520	NOVARTIS PHARMACEUTICALS CORPORATION,EAST HANOVER,NJ,US NOVARTIS PHARMACEUTICALS CORPORATION|ONE HEALTH PLAZA EAST HANOVER NEW JERSEY 07936 NOVARTIS PHARMACEUTICALS CORPORATION NOVARTIS AG 2011-03-17 2011 026002/0790 2011-03-23 2011 ASSIGNMENT OF ASSIGNORS INTEREST (SEE DOCUMENT FOR DETAILS). LINDA ADAMS NOVARTIS PHARMACEUTICALS CORP. ONE HEALTH PLAZA EAST HANOVER, NJ 07936 | NOVARTIS AG,BASEL,CH…				27	123	US2006805883P,2006-06-27
	CA2654986A1	SOLID DOSAGE FORMS OF VALSARTAN, AMLODIPINE AND HYDROCHLOROTHIAZIDE AND METHOD OF MAKING THE SAME | FORMES GALENIQUES SOLIDES DU VALSARTAN, DE L'AMLODIPINE ET DE L'HYDROCHLOROTHIAZIDE ET LEUR METHODE DE FABRICATION	Monolayer, bilayer and trilayer solid dosage forms of a combination of valsartan, amlodipine and hydrochlorothiazide are made. La présente invention porte sur les formes galéniques solides monocouches, bicouches et tricouches d'une combinaison de valsartan, d'amlodipine et d'hydrochlorothiazide.	2007-06-26	CA2654986A	US2006805883P | WO2007US72097A	2006-06-27 | 2007-06-26	2008-01-03	NOVARTIS AG,BASEL,CH	CA2654986A1 | AR61627A1 | AU2007265138A1 | BRPI0713785A2 | CL1870200700A1 | CN101478956A | CN101478956B | CN103169711A | EC2008SP8987A | EP2037893A2 | HK1133818A1 | IL195797D0 | JP2009542709A | KR2009021191A | MA30529B1 | MX2008016532A | NO200900314A | NZ573295A | PE20080991A1 | PE20120542A1 | RU2009102273A | RU2449786C2 | TW200808379A | US20100003321A1 | US20120164218A1 | US8475839B2 | WO2008002…	WO2008002905A2 | WO2008002905A3 | NO200900314A | TW200808379A | EP2037893A2 | KR2009021191A | AU2007265138A1 | CN101478956A | IN200810029P1 | CA2654986A1 | MX2008016532A | JP2009542709A | US20100003321A1 | ZA200810053A | RU2009102273A | AU2011203238A1 | NZ573295A | RU2449786C2 | US20120164218A1 | BRPI0713785A2 | CN101478956B | US8475839B2 | CN103169711A | HK1133818A1 | SG148435A1 | SG148435B | IL…	Solid dosage e.g. bilayer tablet useful for treating hypertension, congestive heart failure, angina comprises valsartan, amlodipine, hydrochlorothiazide and additives	20080103AU2007265138A1	2014-12-29 FZDE DEAD - 2014-11-03 | 2012-05-31 EEER EXAMINATION REQUEST +					27	123	CA2654986A,2007-06-26
	US20060270717A1	Therapeutic combination	This invention relates to pharmaceutical combinations of amlodipine or a pharmaceutically acceptable acid addition salt thereof and atorvastatin or a pharmaceutically acceptable salt thereof, kits containing such combinations and methods of using such combinations to treat subjects suffering from angina pectoris, atherosclerosis, combined hypertension and hyperlipidemia and to treat subjects pres…	2006-08-07	US2006499753A	US199757275P | WO1998IB1225A | US2000512914A | US2002214058A	1997-08-29 | 1998-08-11 | 2000-02-25 | 2002-08-07	2006-11-30		US20060270717A1 | AP1225A | AP199801334D0 | AR12269A1 | AT277615T | AT332689T | AU199885548A | AU755636B2 | BG104177A | BG64665B1 | BR199812030A | CA2301732A1 | CA2301732C | CN101062035A | CN1268052A | CO4970694A1 | CZ200000511A3 | CZ301081B6 | DE69826683D1 | DE69826683T2 | DE69835245D1 | DE69835245T2 | DK1003503T3 | DK1491193T3 | DZ2596A1 | EA3549B1 | EP1003503A1 | EP1003503B1 | EP1468682A1 | EP…	WO1999011259A1 | AU199885548A | ZA199807844A | NO200000998A | EP1003503A1 | CZ200000511A3 | BR199812030A | CN1268052A | SK200000204A3 | HU200003656A2 | KR2001023498A | JP2001514222A | MX2000002087A | US6455574B1 | US20030008904A1 | AU755636B | NZ516818A | US20040048906A1 | JP2004210797A | EP1003503B1 | EP1468682A1 | DE69826683D1 | EP1491193A1 | TW592696B | CA2301732C | NZ527158A | ES2227865T3 | D…	Use of a synergistic combination of amlodipine and atorvastatin for treating angina pectoris and atherosclerosis	19980930AP199801334D0						51	85	US2002214058A,2002-08-07 | US2000512914A,2000-02-25
	US20060223865A1	Therapeutic combination	This invention relates to pharmaceutical combinations of amlodipine or a pharmaceutically acceptable acid addition salt thereof and atorvastatin or a pharmaceutically acceptable salt thereof, kits containing such combinations and methods of using such combinations to treat subjects suffering from angina pectoris, atherosclerosis, combined hypertension and hyperlipidemia and to treat subjects pres…	2006-06-07	US2006448100A	US199757275P | WO1998IB1225A | US2000512914A | US2002214058A	1997-08-29 | 1998-08-11 | 2000-02-25 | 2002-08-07	2006-10-05		US20060223865A1 | AP1225A | AP199801334D0 | AR12269A1 | AT277615T | AT332689T | AU199885548A | AU755636B2 | BG104177A | BG64665B1 | BR199812030A | CA2301732A1 | CA2301732C | CN101062035A | CN1268052A | CO4970694A1 | CZ200000511A3 | CZ301081B6 | DE69826683D1 | DE69826683T2 | DE69835245D1 | DE69835245T2 | DK1003503T3 | DK1491193T3 | DZ2596A1 | EA3549B1 | EP1003503A1 | EP1003503B1 | EP1468682A1 | EP…	WO1999011259A1 | AU199885548A | ZA199807844A | NO200000998A | EP1003503A1 | CZ200000511A3 | BR199812030A | CN1268052A | SK200000204A3 | HU200003656A2 | KR2001023498A | JP2001514222A | MX2000002087A | US6455574B1 | US20030008904A1 | AU755636B | NZ516818A | US20040048906A1 | JP2004210797A | EP1003503B1 | EP1468682A1 | DE69826683D1 | EP1491193A1 | TW592696B | CA2301732C | NZ527158A | ES2227865T3 | D…	Use of a synergistic combination of amlodipine and atorvastatin for treating angina pectoris and atherosclerosis	19980930AP199801334D0						51	85	US2002214058A,2002-08-07 | US2000512914A,2000-02-25
	US20060110450A1	Bilayer tablet of telmisartan and amlodipine	A bilayer tablet comprises a first layer formulated for instant release of the angiotensin II receptor antagonist telmisartan from a dissolving tablet matrix and a second layer formulated for instant release of the calcium channel blocker amlodipine from a disintegrating or eroding tablet matrix.	2005-11-02	US2005265722A	EP200426234A	2004-11-05	2006-05-25	Boehringer Ingelheim International GmbH,Ingelheim,DE	US20060110450A1 | AR51618A1 | AU2005300787A1 | AU2005300787B2 | BR200517809A | CA2582049A1 | CA2582049C | CN101052381A | CN103083318A | DK1814527T3 | EA13053B1 | EA200700977A1 | EP1814527A1 | EP1814527B1 | ES2452019T3 | HRP20140212T1 | IL182926D0 | JP05134963B2 | JP2008518888A | KR2007085801A | MX2007005235A | MY150758A | NO200701514A | NZ555284A | PE20061046A1 | PE20110216A1 | PT1814527E | RS531…	WO2006048208A1 | US20060110450A1 | EP1814527A1 | AU2005300787A1 | IN200702978P1 | KR2007085801A | CN101052381A | JP2008518888A | MX2007005235A | ZA200702119A | BR200517809A | NZ555284A | TW200630094A | CA2582049C | VN10009157B | AU2005300787B2 | TWI355268B | JP05134963B2 | CN103083318A | EP1814527B1 | SG132165A1 | SG132165B | ES2452019T3 | HK1184715A0 | PH12007500960B1	Pharmaceutical tablet for treating hypertension alone or in combination with treatment of condition e.g. stroke, has layer of telmisartan in dissolving tablet matrix and layer of amlodipine in disintegrating or eroding tablet matrix	20060511AU2005300787A1	2006-02-07 AS ASSIGNMENT BOEHRINGER INGELHEIM INTERNATIONAL GMBH, GERMANY ASSIGNMENT OF ASSIGNORS INTEREST;ASSIGNOR:EISENREICH, WOLFRAM;REEL/FRAME:017239/0955 2006-01-20	BOEHRINGER INGELHEIM INTERNATIONAL GMBH,INGELHEIM,DE BOEHRINGER INGELHEIM INTERNATIONAL GMBH|BINGER STRASSE 173 INGELHEIM GERMANY 55216 BOEHRINGER INGELHEIM INTERNATIONAL GMBH EISENREICH, WOLFRAM 2006-01-20 2006 017239/0955 2006-02-07 2006 ASSIGNMENT OF ASSIGNORS INTEREST (SEE DOCUMENT FOR DETAILS). BOEHRINGER INGELHEIM CORPORATION MICHAEL P. MORRIS 900 RIDGEBURY ROAD P.O. BOX 368 RIDGEFIELD, CT …				25	114
	CA2582049A1	BILAYER TABLET COMPRISING TELMISARTAN AND AMLODIPINE | COMPRIME BICOUCHE CONTENANT DU TELMISARTAN ET DE L'AMLODIPINE	A bilayer tablet comprises a first layer formulated for instant release of the angiotensin II receptor antagonist telmisartan from a dissolving tablet matrix and a second layer formulated for instant release of the calcium channel blocker amlodipine from a disintegrating or eroding tablet matrix. L'invention concerne un comprimé bicouche comportant une première couche formulée pour la libération …	2005-10-29	CA2582049A	EP200426234A | WO2005EP11596A	2004-11-05 | 2005-10-29	2006-05-11	BOEHRINGER INGELHEIM INTERNATIONAL GMBH,INGELHEIM AM RHEIN,DE	CA2582049A1 | AR51618A1 | AU2005300787A1 | AU2005300787B2 | BR200517809A | CA2582049C | CN101052381A | CN103083318A | DK1814527T3 | EA13053B1 | EA200700977A1 | EP1814527A1 | EP1814527B1 | ES2452019T3 | HRP20140212T1 | IL182926D0 | JP05134963B2 | JP2008518888A | KR2007085801A | MX2007005235A | MY150758A | NO200701514A | NZ555284A | PE20061046A1 | PE20110216A1 | PT1814527E | RS53141B | SI1814527T1 …			20060511AU2005300787A1	2008-10-03 EEER EXAMINATION REQUEST +							CA2582049A,2005-10-29
	CA2582049C	BILAYER TABLET COMPRISING TELMISARTAN AND AMLODIPINE | COMPRIME BICOUCHE CONTENANT DU TELMISARTAN ET DE L'AMLODIPINE	A bilayer tablet comprises a first layer formulated for instant release of the angiotensin II receptor antagonist telmisartan from a dissolving tablet matrix and a second layer formulated for instant release of the calcium channel blocker amlodipine from a disintegrating or eroding tablet matrix. L'invention concerne un comprimé bicouche comportant une première couche formulée pour la libération …	2005-10-29	CA2582049A	EP200426234A | WO2005EP11596A	2004-11-05 | 2005-10-29	2010-08-24	BOEHRINGER INGELHEIM INTERNATIONAL GMBH,INGELHEIM AM RHEIN,DE	CA2582049C | AR51618A1 | AU2005300787A1 | AU2005300787B2 | BR200517809A | CA2582049A1 | CN101052381A | CN103083318A | DK1814527T3 | EA13053B1 | EA200700977A1 | EP1814527A1 | EP1814527B1 | ES2452019T3 | HRP20140212T1 | IL182926D0 | JP05134963B2 | JP2008518888A | KR2007085801A | MX2007005235A | MY150758A | NO200701514A | NZ555284A | PE20061046A1 | PE20110216A1 | PT1814527E | RS53141B | SI1814527T1 …	WO2006048208A1 | US20060110450A1 | EP1814527A1 | AU2005300787A1 | IN200702978P1 | KR2007085801A | CN101052381A | JP2008518888A | MX2007005235A | ZA200702119A | BR200517809A | NZ555284A | TW200630094A | CA2582049C | VN10009157B | AU2005300787B2 | TWI355268B | JP05134963B2 | CN103083318A | EP1814527B1 | SG132165A1 | SG132165B | ES2452019T3 | HK1184715A0 | PH12007500960B1	Pharmaceutical tablet for treating hypertension alone or in combination with treatment of condition e.g. stroke, has layer of telmisartan in dissolving tablet matrix and layer of amlodipine in disintegrating or eroding tablet matrix	20060511AU2005300787A1	2008-10-03 EEER EXAMINATION REQUEST +					25	114	, | CA2582049A,2005-10-29
	US20050222137A1	Combination of organic compounds	The present invention relates to a combination of organic compounds, a pharmaceutical composition and a kit of parts comprising said combination of organic compounds and to a method of treatment or prevention of certain conditions or diseases.	2005-01-07	US2003514682A	US2002381547P | WO2003EP5180A	2002-05-17 | 2003-05-16	2005-10-06		US20050222137A1 | AR40014A1 | AT429223T | AU2003240261A1 | AU2003240261B2 | BR200310092A | CA2486144A1 | CA2486144C | CN101890166A | CN1652777A | CY1109240T1 | DE60327316D1 | DK1507529T3 | EC2004SP5429A | EG24716A | EP1507529A1 | EP1507529B1 | EP1507529B8 | ES2325207T3 | HK1074773A1 | IL164925A | IL164925D0 | JP05132872B2 | JP2005533023A | JP2010209123A | KR1454070B1 | KR2005000546A | KR201110787…	WO2003097045A1 | AU2003240261A1 | EP1507529A1 | BR200310092A | NO200405429A | KR2005000546A | US20050222137A1 | MX2004011385A | TW200406204A | CN1652777A | JP2005533023A | ZA200408737A | NZ536557A | AU2003240261B2 | IN200402587P4 | RU2324482C2 | US20090099241A1 | EP1507529B1 | DE60327316D1 | ES2325207T3 | IN223313B | MX267988B | EP1507529B8 | JP2010209123A | CN101890166A | KR2011107877A | US81015…	Composition, useful for the treatment of e.g. hypertension and heart diseases, comprises an angiotensin receptor blocker, calcium channel blocker and a diuretic	20031127CA2486144A1						37	93	US2002381547P,2002-05-17
	US20050182042A1	Pharmaceutical composition comprising a renin inhibitor, a calcium channel blocker and a diuretic	The invention relates to a pharmaceutical composition comprising (i) a renin inhibitor, (ii) a calcium channel blocker (CCB), and (iii) a diuretic and to a method of treatment of a condition or a disease selected from the group consisting of hypertension, heart failure such as (acute and chronic) congestive heart failure, left ventricular dysfunction and hypertrophic cardiomyopathy, diabetic card…	2004-11-16	US2003514683A	US2002381546P | WO2003EP5188A | US2003514683A	2002-05-17 | 2003-05-16 | 2004-11-16	2005-08-18		US20050182042A1 | AT520417T | AU2003240669A1 | AU2003240669B2 | BR200310084A | CA2485081A1 | CA2485081C | CN1655819A | DK1507558T3 | EC2004SP5428A | EP1507558A1 | EP1507558B1 | EP1507558B8 | EP2316488A1 | ES2369216T3 | HK1074774A1 | IL164837A | IL164837D0 | JP05288678B2 | JP2005526850A | JP2010280708A | KR2005008717A | KR2010137026A | KR2013109244A | LU92000I2 | MX2004011383A | NO200405459A | NO3…	WO2003097098A1 | AU2003240669A1 | EP1507558A1 | BR200310084A | NO200405459A | KR2005008717A | US20050182042A1 | JP2005526850A | MX2004011383A | CN1655819A | ZA200408442A | NZ536555A | AU2003240669B2 | RU2316318C2 | IN200402588P4 | US20080300238A1 | MX252472B | IN224613B | JP2010280708A | KR2010137026A | EP2316488A1 | EP1507558B1 | ES2369216T3 | EP1507558B8 | US20120071470A1 | US8183295B2 | HK1074…	Composition useful for treating e.g. heart failure comprises a renin inhibitor, a calcium channel blocker and a diuretic	20031127CA2485081A1						35	91	US2002381546P,2002-05-17
	US20050070594A1	Use of angiotensin II receptor antagonists	The invention relates to the use of angiotensin II receptor antagonists for treating people in whom type 2 diabetes mellitus has been diagnosed or who are suspected of prediabetes, for preventing diabetes or for treating metabolic syndrome and insulin resistance in patients with normal blood pressure.	2004-07-27	US2004899784A	DE10335027A | US2003503317P | DE10346260A | US2003514998P | DE10356815A | US2004534516P	2003-07-31 | 2003-09-16 | 2003-10-06 | 2003-10-28 | 2003-12-05 | 2004-01-06	2005-03-31	Boehringer Ingelheim International GmbH,DE	US20050070594A1 | AT362782T | AT443519T | AT536871T | AU2004204352A1 | AU2004204352B2 | AU2004204353A1 | AU2004260606A1 | AU2004260606B2 | BR200406455A | BR200406812A | BR200413165A | CA2513277A1 | CA2513281A1 | CA2513281C | CA2534006A1 | CA2534006C | CN101926997A | CN102139110A | CN1738617A | CN1738665A | CN1829511A | CN1829511B | CY1109560T1 | DE10301371A1 | DE10301372A1 | DE10335027A1 | DE1034…	WO2005011680A1 | US20050070594A1 | DE10346260A1 | DE10356815A1 | EP1651213A1 | NO200600938A | AU2004260606A1 | BR200413165A | KR2006054404A | MX2006001322A | ZA200509835A | CN1829511A | JP2007500677A | NZ544877A | WO2005011680A8 | EP1651213B1 | DE502004010117D1 | EP2119441A1 | MX269633B | CA2534006C | IN200908086P1 | AU2004260606B2 | EP2263670A1 | CN101926997A | PH12006500161B1 | JP04833840B2 | C…	Use of an angiotensin II receptor antagonist for treating type 2 diabetes or prediabetes, for preventing diabetes or for treating metabolic syndrome and insulin resistance in patients with normal blood pressure	20040729AU2004204352A1	2004-12-10 AS ASSIGNMENT BOEHRINGER INGELHEIN INTERNATIONAL GMBH, GERMANY ASSIGNMENT OF ASSIGNORS INTEREST;ASSIGNORS:KAUSCHKE, STEFAN;MARK, MICHAEL;KINTSCHER, ULRICH;AND OTHERS;REEL/FRAME:015446/0882;SIGNING DATES FROM 20041104 TO 20041116	BOEHRINGER INGELHEIN INTERNATIONAL GMBH,INGELHEIM,DE BOEHRINGER INGELHEIN INTERNATIONAL GMBH|BINGER STRASSE 173 INGELHEIM GERMANY 55216 BOEHRINGER INGELHEIN INTERNATIONAL GMBH KAUSCHKE, STEFAN 2004-11-04 2004 MARK, MICHAEL 2004-11-04 2004 KINTSCHER, ULRICH 2004-11-16 2004 SCHUPP, MICHAEL 2004-11-16 2004 UNGER, THOMAS 2004-11-16 2004 015446/0882 2004-12-10 2004 ASSIGNMENT OF ASSIGNORS INTEREST (SE…				35	107	US2003503317P,2003-09-16 | US2003514998P,2003-10-28 | US2004534516P,2004-01-06
	CA2534006A1	USE OF ANGIOTENSIN II RECEPTOR ANTAGONISTS, ESPECIALLY TELMISARTAN, IN ORDER TO INCREASE INSULIN SENSITIVITY | UTILISATION D'ANTAGONISTES DU RECEPTEUR DE L'ANGIOTENSINE II, EN PARTICULIER DE TELMISARTAN, POUR AUGMENTER LA SENSIBILITE A L'INSULINE | USE OF ANGIOTENSIN II RECEPTOR ANTAGONISTS	The invention relates to the use of angiotensin II receptor antagonists for the treatment of people who have been diagnosed with type 2 diabetes mellitus, or are thought to have prediabetes, in order to prevent diabetes or for the treatment of metabolic syndrome and the resistance of insulin in patients having normal blood pressure. L'invention concerne l'utilisation d'antagonistes du récepteur d…	2004-07-24	CA2534006A	DE10335027A | DE10346260A | DE10356815A | WO2004EP8326A	2003-07-31 | 2003-10-06 | 2003-12-05 | 2004-07-24	2005-02-10	BOEHRINGER INGELHEIM INTERNATIONAL GMBH,INGELHEIM/RHEIN	CA2534006A1 | AT362782T | AT443519T | AT536871T | AU2004204352A1 | AU2004204352B2 | AU2004204353A1 | AU2004260606A1 | AU2004260606B2 | BR200406455A | BR200406812A | BR200413165A | CA2513277A1 | CA2513281A1 | CA2513281C | CA2534006C | CN101926997A | CN102139110A | CN1738617A | CN1738665A | CN1829511A | CN1829511B | CY1109560T1 | DE10301371A1 | DE10301372A1 | DE10335027A1 | DE10346260A1 | DE1035681…			20040729AU2004204352A1	2008-10-29 EEER EXAMINATION REQUEST +							CA2534006A,2004-07-24
	CA2534006C	USE OF ANGIOTENSIN II RECEPTOR ANTAGONISTS | UTILISATION D'ANTAGONISTES DU RECEPTEUR DE L'ANGIOTENSINE II	The invention relates to the use of angiotensin II receptor antagonists for the treatment of people who have been diagnosed with type 2 diabetes mellitus, or are thought to have prediabetes, in order to prevent diabetes or for the treatment of metabolic syndrome and the resistance of insulin in patients having normal blood pressure. L'invention concerne l'utilisation d'antagonistes du récepteur d…	2004-07-24	CA2534006A	DE10335027A | DE10346260A | DE10356815A | WO2004EP8326A	2003-07-31 | 2003-10-06 | 2003-12-05 | 2004-07-24	2010-07-13	BOEHRINGER INGELHEIM INTERNATIONAL GMBH,INGELHEIM AM RHEIN,DE	CA2534006C | AT362782T | AT443519T | AT536871T | AU2004204352A1 | AU2004204352B2 | AU2004204353A1 | AU2004260606A1 | AU2004260606B2 | BR200406455A | BR200406812A | BR200413165A | CA2513277A1 | CA2513281A1 | CA2513281C | CA2534006A1 | CN101926997A | CN102139110A | CN1738617A | CN1738665A | CN1829511A | CN1829511B | CY1109560T1 | DE10301371A1 | DE10301372A1 | DE10335027A1 | DE10346260A1 | DE1035681…	WO2005011680A1 | US20050070594A1 | DE10346260A1 | DE10356815A1 | EP1651213A1 | NO200600938A | AU2004260606A1 | BR200413165A | KR2006054404A | MX2006001322A | ZA200509835A | CN1829511A | JP2007500677A | NZ544877A | WO2005011680A8 | EP1651213B1 | DE502004010117D1 | EP2119441A1 | MX269633B | CA2534006C | IN200908086P1 | AU2004260606B2 | EP2263670A1 | CN101926997A | PH12006500161B1 | JP04833840B2 | C…	Use of an angiotensin II receptor antagonist for treating type 2 diabetes or prediabetes, for preventing diabetes or for treating metabolic syndrome and insulin resistance in patients with normal blood pressure	20040729AU2004204352A1	2008-10-29 EEER EXAMINATION REQUEST +					35	107	, | CA2534006A,2004-07-24
	CA2513277A1	PHARMACEUTICAL COMBINATION FOR THE PREVENTION OR TREATMENT OF CARDIOVASCULAR, CARDIOPULMONARY, PULMONARY OR RENAL DISEASES | COMBINAISON PHARMACEUTIQUE POUR PREVENIR OU SOIGNER DES MALADIES CARDIO-VASCULAIRES, CARDIO-PULMONAIRES, PULMONAIRES OU RENALES	The invention relates to a method for the prophylaxis or treatment of cardiovascular, cardiopulmonary, pulmonary or renal diseases, achieved by the improvement of endothelial function and the protection of organs, tissues and vessels when indications require a blood pressure check and a lipid level check, especially in patients that have been diagnosed with type 2 diabetes mellitus or if prediabe…	2004-01-14	CA2513277A	DE10301371A | DE10335027A | WO2004EP174A	2003-01-16 | 2003-07-31 | 2004-01-14	2004-07-29	BOEHRINGER INGELHEIM INTERNATIONAL GMBH,INGELHEIM/RHEIN,DE	CA2513277A1 | AT362782T | AT443519T | AT536871T | AU2004204352A1 | AU2004204352B2 | AU2004204353A1 | AU2004260606A1 | AU2004260606B2 | BR200406455A | BR200406812A | BR200413165A | CA2513281A1 | CA2513281C | CA2534006A1 | CA2534006C | CN101926997A | CN102139110A | CN1738617A | CN1738665A | CN1829511A | CN1829511B | CY1109560T1 | DE10301371A1 | DE10301372A1 | DE10335027A1 | DE10346260A1 | DE1035681…			20040729AU2004204352A1	2012-09-04 FZDE DEAD - | 2009-01-12 EEER EXAMINATION REQUEST +							CA2513277A,2004-01-14
	CA2513281A1	PHARMACEUTICAL COMBINATION FOR THE PREVENTION OR TREATMENT OF CARDIOVASCULAR, CARDIOPULMONARY, PULMONARY OR RENAL DISEASES | COMBINAISON PHARMACEUTIQUE POUR PREVENIR OU SOIGNER DES MALADIES CARDIO-VASCULAIRES, CARDIO-PULMONAIRES, PULMONAIRES OU RENALES	The invention relates to a method for the prophylaxis or treatment of cardiovascular, cardiopulmonary, pulmonary or renal diseases, achieved by the improvement of endothelial function and the protection of organs, tissues and vessels when indications require a blood pressure check and a lipid level check, especially in patients that have been diagnosed with type 2 diabetes mellitus or if prediabe…	2004-01-14	CA2513281A	DE10301372A | DE10335027A | WO2004EP175A	2003-01-16 | 2003-07-31 | 2004-01-14	2004-07-29	BOEHRINGER INGELHEIM INTERNATIONAL GMBH,INGELHEIM/RHEIN,DE	CA2513281A1 | AT362782T | AT443519T | AT536871T | AU2004204352A1 | AU2004204352B2 | AU2004204353A1 | AU2004260606A1 | AU2004260606B2 | BR200406455A | BR200406812A | BR200413165A | CA2513277A1 | CA2513281C | CA2534006A1 | CA2534006C | CN101926997A | CN102139110A | CN1738617A | CN1738665A | CN1829511A | CN1829511B | CY1109560T1 | DE10301371A1 | DE10301372A1 | DE10335027A1 | DE10346260A1 | DE1035681…			20040729AU2004204352A1	2009-01-12 EEER EXAMINATION REQUEST +							CA2513281A,2004-01-14
	CA2513281C	PHARMACEUTICAL COMBINATION FOR THE PREVENTION OR TREATMENT OF CARDIOVASCULAR, CARDIOPULMONARY, PULMONARY OR RENAL DISEASES | COMBINAISON PHARMACEUTIQUE POUR PREVENIR OU SOIGNER DES MALADIES CARDIO-VASCULAIRES, CARDIO-PULMONAIRES, PULMONAIRES OU RENALES	The present invention relates to a process for the prevention or treatment of cardiovascular, cardiopulmonary, pulmonary or renal diseases by improving endothelial function and achieving protection of organs, tissues and blood vessels in indications in which control of blood pressure and lipid levels are necessary, particularly in people in whom type 2 diabetes mellitus has been diagnosed or who …	2004-01-14	CA2513281A	DE10301372A | DE10335027A | WO2004EP175A	2003-01-16 | 2003-07-31 | 2004-01-14	2012-04-03	BOEHRINGER INGELHEIM INTERNATIONAL GMBH,INGELHEIM AM RHEIN,DE	CA2513281C | AT362782T | AT443519T | AT536871T | AU2004204352A1 | AU2004204352B2 | AU2004204353A1 | AU2004260606A1 | AU2004260606B2 | BR200406455A | BR200406812A | BR200413165A | CA2513277A1 | CA2513281A1 | CA2534006A1 | CA2534006C | CN101926997A | CN102139110A | CN1738617A | CN1738665A | CN1829511A | CN1829511B | CY1109560T1 | DE10301371A1 | DE10301372A1 | DE10335027A1 | DE10346260A1 | DE1035681…	WO2004062729A1 | US20040259925A1 | US20050004193A1 | DE10335027A1 | NO200503793A | AU2004204353A1 | EP1587584A1 | BR200406812A | MX2005007559A | JP2006515877A | CN1738665A | ZA200503809A | KR2005092119A | IN200503101P1 | EP1587584B1 | DE502004003880D1 | EP1818056A1 | IN200600492P1 | ES2287689T3 | MX253927B | US20110190277A1 | CN102139110A | CA2513281C | HK1151976A0 | HK1093305A1 | SG113353B	Use of telmisartan and simvastatin for treatment or prophylaxis of cardiovascular, cardiopulmonary and renal diseases e.g. hypertension combined with hyperlipidemia or atherosclerosis	20040729AU2004204352A1	2009-01-12 EEER EXAMINATION REQUEST +					26	108	CA2513281A,2004-01-14 | ,
	US20040259925A1	Pharmaceutical compositions and methds for the prevention or treatment of cardiovascular, cardiopulmonary, pulmonary or renal diseases	The present invention relates to a process for the prevention or treatment of cardiovascular, cardiopulmonary, pulmonary or renal diseases by improving endothelial function and achieving protection of organs, tissues and blood vessels in indications in which control of blood pressure and lipid levels are necessary, particularly in people in whom type 2 diabetes mellitus has been diagnosed or who …	2004-01-14	US2004757295A	DE10301371A | US2003446695P | DE10335027A | US2003503317P	2003-01-16 | 2003-02-11 | 2003-07-31 | 2003-09-16	2004-12-23	Boehringer Ingelheim Pharma GmbH & Co. KG,DE	US20040259925A1 | AT362782T | AT443519T | AT536871T | AU2004204352A1 | AU2004204352B2 | AU2004204353A1 | AU2004260606A1 | AU2004260606B2 | BR200406455A | BR200406812A | BR200413165A | CA2513277A1 | CA2513281A1 | CA2513281C | CA2534006A1 | CA2534006C | CN101926997A | CN102139110A | CN1738617A | CN1738665A | CN1829511A | CN1829511B | CY1109560T1 | DE10301371A1 | DE10301372A1 | DE10335027A1 | DE1034…	WO2004062729A1 | US20040259925A1 | US20050004193A1 | DE10335027A1 | NO200503793A | AU2004204353A1 | EP1587584A1 | BR200406812A | MX2005007559A | JP2006515877A | CN1738665A | ZA200503809A | KR2005092119A | IN200503101P1 | EP1587584B1 | DE502004003880D1 | EP1818056A1 | IN200600492P1 | ES2287689T3 | MX253927B | US20110190277A1 | CN102139110A | CA2513281C | HK1151976A0 | HK1093305A1 | SG113353B	Use of telmisartan and simvastatin for treatment or prophylaxis of cardiovascular, cardiopulmonary and renal diseases e.g. hypertension combined with hyperlipidemia or atherosclerosis	20040729AU2004204352A1	2004-09-01 AS ASSIGNMENT BOEHRINGER INGELHEIM PHARMA GMBH & CO. KG, GERMANY ASSIGNMENT OF ASSIGNORS INTEREST;ASSIGNORS:RIEDEL, AXEL;SENDRA, JOSEP-MARIA;LEITER, JOSEF M.E.;AND OTHERS;REEL/FRAME:015099/0678;SIGNING DATES FROM 20040709 TO 20040818	BOEHRINGER INGELHEIM PHARMA GMBH & CO. KG,INGELHEIM,DE BOEHRINGER INGELHEIM PHARMA GMBH & CO. KG|BINGER STRASSE 173 INGELHEIM GERMANY 55216 BOEHRINGER INGELHEIM PHARMA GMBH & CO. KG RIEDEL, AXEL 2004-07-19 2004 SENDRA, JOSEP-MARIA 2004-08-18 2004 LEITER, JOSEF M.E. 2004-07-09 2004 KAUSCHKE, STEFAN 2004-07-22 2004 MARK, MICHAEL 2004-07-22 2004 015099/0678 2004-09-01 2004 ASSIGNMENT OF ASSIGNORS IN…				26	108	US2003446695P,2003-02-11 | US2003503317P,2003-09-16
	US20050004193A1	Pharmaceutical combination for the prevention or treatment of cardiovascular, cardiopulmonary, pulmonary, or renal diseases	A method for the prevention or treatment of a cardiovascular, cardiopulmonary, or renal disease or condition in a human or mammal patient, the method comprising administering to the patient in need thereof an effective amount of: (a) telmisartan or a polymorph or salt thereof; and (b) simvastatin.	2004-01-14	US2004757015A	DE10301372A | US2003446437P | DE10335027A | US2003503317P	2003-01-16 | 2003-02-11 | 2003-07-31 | 2003-09-16	2005-01-06	Boehringer Ingelheim International GmbH,DE	US20050004193A1 | AT362782T | AT443519T | AT536871T | AU2004204352A1 | AU2004204352B2 | AU2004204353A1 | AU2004260606A1 | AU2004260606B2 | BR200406455A | BR200406812A | BR200413165A | CA2513277A1 | CA2513281A1 | CA2513281C | CA2534006A1 | CA2534006C | CN101926997A | CN102139110A | CN1738617A | CN1738665A | CN1829511A | CN1829511B | CY1109560T1 | DE10301371A1 | DE10301372A1 | DE10335027A1 | DE1034…	WO2004062729A1 | US20040259925A1 | US20050004193A1 | DE10335027A1 | NO200503793A | AU2004204353A1 | EP1587584A1 | BR200406812A | MX2005007559A | JP2006515877A | CN1738665A | ZA200503809A | KR2005092119A | IN200503101P1 | EP1587584B1 | DE502004003880D1 | EP1818056A1 | IN200600492P1 | ES2287689T3 | MX253927B | US20110190277A1 | CN102139110A | CA2513281C | HK1151976A0 | HK1093305A1 | SG113353B	Use of telmisartan and simvastatin for treatment or prophylaxis of cardiovascular, cardiopulmonary and renal diseases e.g. hypertension combined with hyperlipidemia or atherosclerosis	20040729AU2004204352A1	2004-09-15 AS ASSIGNMENT BOEHRINGER INGELHEIM INTERNATIONAL GMBH, GERMANY ASSIGNMENT OF ASSIGNORS INTEREST;ASSIGNORS:RIEDEL, AXEL;LEITER, JOSEF M.E.;SENDRA, JOSEP-MARIA;AND OTHERS;REEL/FRAME:015142/0087;SIGNING DATES FROM 20040620 TO 20040904	BOEHRINGER INGELHEIM INTERNATIONAL GMBH,INGELHEIM,DE BOEHRINGER INGELHEIM INTERNATIONAL GMBH|BINGER STRASSE 173 INGELHEIM GERMANY 55216 BOEHRINGER INGELHEIM INTERNATIONAL GMBH RIEDEL, AXEL 2004-08-03 2004 LEITER, JOSEF M.E. 2004-06-20 2004 SENDRA, JOSEP-MARIA 2004-09-04 2004 KAUSCHKE, STEFAN 2004-08-09 2004 MARK, MICHAEL 2004-08-16 2004 015142/0087 2004-09-15 2004 ASSIGNMENT OF ASSIGNORS INTEREST…				26	108	US2003446437P,2003-02-11 | US2003503317P,2003-09-16
	US20040048906A1	Therapeuctic combination	This invention relates to pharmaceutical combinations of amlodipine or a pharmaceutically acceptable acid addition salt thereof and atorvastatin or a pharmaceutically acceptable salt thereof, kits containing such combinations and methods of using such combinations to treat subjects suffering from angina pectoris, atherosclerosis, combined hypertension and hyperlipidemia and to treat subjects pres…	2003-08-08	US2003637781A	US199757275P | WO1998IB1225A | US2000512914A | US2002214058A	1997-08-29 | 1998-08-11 | 2000-02-25 | 2002-08-07	2004-03-11		US20040048906A1 | AP1225A | AP199801334D0 | AR12269A1 | AT277615T | AT332689T | AU199885548A | AU755636B2 | BG104177A | BG64665B1 | BR199812030A | CA2301732A1 | CA2301732C | CN101062035A | CN1268052A | CO4970694A1 | CZ200000511A3 | CZ301081B6 | DE69826683D1 | DE69826683T2 | DE69835245D1 | DE69835245T2 | DK1003503T3 | DK1491193T3 | DZ2596A1 | EA3549B1 | EP1003503A1 | EP1003503B1 | EP1468682A1 | EP…	WO1999011259A1 | AU199885548A | ZA199807844A | NO200000998A | EP1003503A1 | CZ200000511A3 | BR199812030A | CN1268052A | SK200000204A3 | HU200003656A2 | KR2001023498A | JP2001514222A | MX2000002087A | US6455574B1 | US20030008904A1 | AU755636B | NZ516818A | US20040048906A1 | JP2004210797A | EP1003503B1 | EP1468682A1 | DE69826683D1 | EP1491193A1 | TW592696B | CA2301732C | NZ527158A | ES2227865T3 | D…	Use of a synergistic combination of amlodipine and atorvastatin for treating angina pectoris and atherosclerosis	19980930AP199801334D0						51	85	US199757275P,1997-08-29 | US2002214058A,2002-08-07 | US2000512914A,2000-02-25 | WO1998IB1225A,1998-08-11
	US8168616B1	Combination comprising a renin inhibitor and an angiotensin receptor inhibitor for hypertension	The invention relates to a combination comprising the renin inhibitor of formula (I) or a pharmaceutically acceptable salt thereof. L'invention se rapporte à un complexe médicamenteux comportant l'inhibiteur de la rénine de la formule (I), ainsi qu'à un sel pharmaceutiquement acceptable dudit complexe.	2003-07-25	US2003416039A	US2003416039A | GB200028151A | WO2001EP13241A	2000-11-15 | 2000-11-17 | 2001-11-15	2012-05-01	Novartis AG,Basel,CH	US8168616B1 | AT317692T | AT397445T | AU2002223680B2 | AU200223680A | BR200115411A | CA2428647A1 | CA2763223A1 | CN100404024C | CN101091703A | CN101264072A | CN101264073A | CN1474690A | CZ299749B6 | DE122009000021I1 | DE60117295D1 | DE60117295T2 | DE60134349D1 | DK1341533T3 | DK1602370T3 | DK1915993T3 | EC2003SP4603A | EP1341533A1 | EP1341533B1 | EP1602370A2 | EP1602370A3 | EP1602370B1 | EP191599…	WO2002040007A1 | AU200223680A | NO200302233A | CZ200301341A3 | EP1341533A1 | HU200301841A2 | KR2003051753A | SK200300584A3 | CN1474690A | JP2004513920A | ZA200303497A | BR200115411A | MX2003004358A | NZ525795A | AU2002223680B2 | IN200300724P4 | EP1602370A2 | EP1341533B1 | DE60117295D1 | ES2256335T3 | DE60117295T2 | MX239582B | NZ537691A | SG135969A1 | RU2310443C2 | NZ550897A | CN101091703A | EP19…	Synergistic composition comprises renin inhibitor and active agent e.g. angiotensin converting enzyme inhibitor for the treatment of e.g. hypertension	20010103GB200028151D0	2013-08-13 CC CERTIFICATE OF CORRECTION | 2012-03-23 AS ASSIGNMENT NOVARTIS AG, SWITZERLAND ASSIGNMENT OF ASSIGNORS INTEREST;ASSIGNORS:HEWITT, WILLIAM;VASELLA, DANIEL LUCIUS;WEBB, RANDY LEE;SIGNING DATES FROM 20030513 TO 20050710;REEL/FRAME:027916/0852	NOVARTIS AG,BASEL,CH NOVARTIS AG|LICHTSTRASSE 35 BASEL SWITZERLAND 4056 NOVARTIS AG HEWITT, WILLIAM 2005-07-10 2005 VASELLA, DANIEL LUCIUS 2003-05-13 2003 WEBB, RANDY LEE 2003-06-27 2003 027916/0852 2012-03-23 2012 ASSIGNMENT OF ASSIGNORS INTEREST (SEE DOCUMENT FOR DETAILS). CINDY KLEPACKY ONE HEALTH PLAZA EAST HANOVER, NJ 07936	CC			78	88
	CA2485081A1	PHARMACEUTICAL COMPOSITION COMPRISING A RENIN INHIBITOR, A CALCIUM CHANNEL BLOCKER AND A DIURETIC | COMPOSITION PHARMACEUTIQUE COMPRENANT UN INHIBITEUR DE RENINE, UN AGENT DE BLOCAGE DU CANAL DU CALCIUM ET UN DIURETIQUE	The invention relates to a pharmaceutical composition comprising (i) a renin inhibitor, (ii) a calcium channel blocker (CCB), and (iii) a diuretic and to a method of treatment of a condition or a disease selected from the group consisting of hypertension, heart failure such as (acute and chronic) congestive heart failure, left ventricular dysfunction and hypertrophic cardiomyopathy, diabetic card…	2003-05-16	CA2485081A	US2002381546P | WO2003EP5188A	2002-05-17 | 2003-05-16	2003-11-27	NOVARTIS AG,BASEL,CH	CA2485081A1 | AT520417T | AU2003240669A1 | AU2003240669B2 | BR200310084A | CA2485081C | CN1655819A | DK1507558T3 | EC2004SP5428A | EP1507558A1 | EP1507558B1 | EP1507558B8 | EP2316488A1 | ES2369216T3 | HK1074774A1 | IL164837A | IL164837D0 | JP05288678B2 | JP2005526850A | JP2010280708A | KR2005008717A | KR2010137026A | KR2013109244A | LU92000I2 | MX2004011383A | NO200405459A | NO334382B1 | NZ536555…			20031127CA2485081A1	2008-05-01 EEER EXAMINATION REQUEST +							CA2485081A,2003-05-16
	CA2485081C	PHARMACEUTICAL COMPOSITION COMPRISING A RENIN INHIBITOR, A CALCIUM CHANNEL BLOCKER AND A DIURETIC | COMPOSITION PHARMACEUTIQUE COMPRENANT UN INHIBITEUR DE RENINE, UN AGENT DE BLOCAGE DU CANAL DU CALCIUM ET UN DIURETIQUE	The invention relates to a pharmaceutical composition comprising (i) a renin inhibitor, (ii) a calcium channel blocker (CCB), and (iii) a diuretic and to a method of treatment of a condition or a disease selected from the group consisting of hypertension, heart failure such as (acute and chronic) congestive heart failure, left ventricular dysfunction and hypertrophic cardiomyopathy, diabetic card…	2003-05-16	CA2485081A	US2002381546P | WO2003EP5188A	2002-05-17 | 2003-05-16	2013-01-08	NOVARTIS AG,BASEL,CH	CA2485081C | AT520417T | AU2003240669A1 | AU2003240669B2 | BR200310084A | CA2485081A1 | CN1655819A | DK1507558T3 | EC2004SP5428A | EP1507558A1 | EP1507558B1 | EP1507558B8 | EP2316488A1 | ES2369216T3 | HK1074774A1 | IL164837A | IL164837D0 | JP05288678B2 | JP2005526850A | JP2010280708A | KR2005008717A | KR2010137026A | KR2013109244A | LU92000I2 | MX2004011383A | NO200405459A | NO334382B1 | NZ536555…	WO2003097098A1 | AU2003240669A1 | EP1507558A1 | BR200310084A | NO200405459A | KR2005008717A | US20050182042A1 | JP2005526850A | MX2004011383A | CN1655819A | ZA200408442A | NZ536555A | AU2003240669B2 | RU2316318C2 | IN200402588P4 | US20080300238A1 | MX252472B | IN224613B | JP2010280708A | KR2010137026A | EP2316488A1 | EP1507558B1 | ES2369216T3 | EP1507558B8 | US20120071470A1 | US8183295B2 | HK1074…	Composition useful for treating e.g. heart failure comprises a renin inhibitor, a calcium channel blocker and a diuretic	20031127CA2485081A1	2008-05-01 EEER EXAMINATION REQUEST +					35	91	, | CA2485081A,2003-05-16
	CA2486144A1	COMBINATION OF ORGANIC COMPOUNDS | COMBINAISON DE COMPOSES ORGANIQUES | COMPOSITIONS COMPRISING AN ANGIOTENSIN RECEPTOR BLOCKER, A CALCIUM CHANNEL BLOCKER AND A DIURETIC | COMPOSITIONS COMPRENANT UN AGENT BLOQUANT LE RECEPTEUR DE L'ANGIOTENSINE, UN AGENT BLOQUANT DES CANAUX CALCIQUES ET UN AGENT DIURETIQUE DIURETIQUE	The present invention relates to a combination of organic compounds, a pharmaceutical composition and a kit of parts comprising said combination of organic compounds and to a method of treatment or prevention of certain conditions or diseases. Cette invention se rapporte à une combinaison de composés organiques, à une composition pharmaceutique et à un kit de pièces comprenant cette combinaison d…	2003-05-16	CA2486144A	US2002381547P | WO2003EP5180A	2002-05-17 | 2003-05-16	2003-11-27	NOVARTIS AG,BASEL,CH	CA2486144A1 | AR40014A1 | AT429223T | AU2003240261A1 | AU2003240261B2 | BR200310092A | CA2486144C | CN101890166A | CN1652777A | CY1109240T1 | DE60327316D1 | DK1507529T3 | EC2004SP5429A | EG24716A | EP1507529A1 | EP1507529B1 | EP1507529B8 | ES2325207T3 | HK1074773A1 | IL164925A | IL164925D0 | JP05132872B2 | JP2005533023A | JP2010209123A | KR1454070B1 | KR2005000546A | KR2011107877A | MX2004011385A…			20031127CA2486144A1	2008-04-02 EEER EXAMINATION REQUEST +							CA2486144A,2003-05-16
	CA2486144C	COMPOSITIONS COMPRISING AN ANGIOTENSIN RECEPTOR BLOCKER, A CALCIUM CHANNEL BLOCKER AND A DIURETIC | COMPOSITIONS COMPRENANT UN AGENT BLOQUANT LE RECEPTEUR DE L'ANGIOTENSINE, UN AGENT BLOQUANT DES CANAUX CALCIQUES ET UN AGENT DIURETIQUE DIURETIQUE	The present invention relates to a combination of organic compounds, a pharmaceutical composition and a kit of parts comprising said combination of organic compounds and to a method of treatment or prevention of certain conditions or diseases. Cette invention se rapporte à une combinaison de composés organiques, à une composition pharmaceutique et à un kit de pièces comprenant cette combinaison d…	2003-05-16	CA2486144A	US2002381547P | WO2003EP5180A	2002-05-17 | 2003-05-16	2012-02-07	NOVARTIS AG,BASEL,CH	CA2486144C | AR40014A1 | AT429223T | AU2003240261A1 | AU2003240261B2 | BR200310092A | CA2486144A1 | CN101890166A | CN1652777A | CY1109240T1 | DE60327316D1 | DK1507529T3 | EC2004SP5429A | EG24716A | EP1507529A1 | EP1507529B1 | EP1507529B8 | ES2325207T3 | HK1074773A1 | IL164925A | IL164925D0 | JP05132872B2 | JP2005533023A | JP2010209123A | KR1454070B1 | KR2005000546A | KR2011107877A | MX2004011385A…	WO2003097045A1 | AU2003240261A1 | EP1507529A1 | BR200310092A | NO200405429A | KR2005000546A | US20050222137A1 | MX2004011385A | TW200406204A | CN1652777A | JP2005533023A | ZA200408737A | NZ536557A | AU2003240261B2 | IN200402587P4 | RU2324482C2 | US20090099241A1 | EP1507529B1 | DE60327316D1 | ES2325207T3 | IN223313B | MX267988B | EP1507529B8 | JP2010209123A | CN101890166A | KR2011107877A | US81015…	Composition, useful for the treatment of e.g. hypertension and heart diseases, comprises an angiotensin receptor blocker, calcium channel blocker and a diuretic	20031127CA2486144A1	2008-04-02 EEER EXAMINATION REQUEST +					37	93	CA2486144A,2003-05-16 | ,
	US20030139455A1	Amlodipine salt forms and processes for preparing them	Amlodipine besylate forms are described, including amlodipine besylate hydrates and novel amlodipine besylate anhydrates. A method of making various amlodipine besylate forms from an aqueous medium as well as the use of the same as a calcium channel blocker are described.	2002-11-20	US2002300003A	US2001331742P	2001-11-21	2003-07-24		US20030139455A1 | AR37565A1 | AU2002343257A1 | EP1448197A1 | US6828339B2 | WO2003043635A1	WO2003043635A1 | US20030139455A1 | AU2002343257A1 | EP1448197A1 | US6828339B2 | NO200402539A	New crystalline hydrate, anhydrate and amorphous forms of amlodipine besylate useful for the treatment or prevention of e.g. hypertension, angina pectoris	20030530WO2003043635A1	2013-01-29 FP EXPIRED DUE TO FAILURE TO PAY MAINTENANCE FEE - 2012-12-07 | 2012-12-07 LAPS LAPSE FOR FAILURE TO PAY MAINTENANCE FEES - | 2012-07-23 REMI MAINTENANCE FEE REMINDER MAILED | 2008-12-04 SULP SURCHARGE FOR LATE PAYMENT + | 2008-12-04 FPAY FEE PAYMENT + | 2008-06-16 REMI MAINTENANCE FEE REMINDER MAILED | 2005-05-18 AS ASSIGNMENT SYNTHON IP INC., VIRGINIA ASSIGNMENT OF ASSIGNORS INTEREST…	SYNTHON IP INC.,CATHARPIN,VA,US SYNTHON IP INC.|P.O. BOX 161 CATHARPIN VIRGINIA 20143 SYNTHON IP INC. SYNTHON BV 2005-03-17 2005 016026/0687 2005-05-18 2005 ASSIGNMENT OF ASSIGNORS INTEREST (SEE DOCUMENT FOR DETAILS). MARK R. BUSCHER P.O. BOX 161 CATHARPIN, VA 20143 | SYNTHON BV,NL 6545 CM NIJMEGEN,NL SYNTHON BV|MICROWEG 22 NL 6545 CM NIJMEGEN NETHERLANDS SYNTHON BV ETTEMA, GERRIT J.B. 2003-01-06…				6	99	US2001331742P,2001-11-21
	US6828339B2	Amlodipine salt forms and processes for preparing them	Amlodipine besylate forms are described, including amlodipine besylate hydrates and novel amlodipine besylate anhydrates. A method of making various amlodipine besylate forms from an aqueous medium as well as the use of the same as a calcium channel blocker are described.	2002-11-20	US2002300003A	US2001331742P	2001-11-21	2004-12-07	Synthon BV,Nijmegen,NL	US6828339B2 | AR37565A1 | AU2002343257A1 | EP1448197A1 | US20030139455A1 | WO2003043635A1	WO2003043635A1 | US20030139455A1 | AU2002343257A1 | EP1448197A1 | US6828339B2 | NO200402539A	New crystalline hydrate, anhydrate and amorphous forms of amlodipine besylate useful for the treatment or prevention of e.g. hypertension, angina pectoris	20030530WO2003043635A1	2013-01-29 FP EXPIRED DUE TO FAILURE TO PAY MAINTENANCE FEE - 2012-12-07 | 2012-12-07 LAPS LAPSE FOR FAILURE TO PAY MAINTENANCE FEES - | 2012-07-23 REMI MAINTENANCE FEE REMINDER MAILED | 2008-12-04 SULP SURCHARGE FOR LATE PAYMENT + | 2008-12-04 FPAY FEE PAYMENT + | 2008-06-16 REMI MAINTENANCE FEE REMINDER MAILED | 2005-05-18 AS ASSIGNMENT SYNTHON IP INC., VIRGINIA ASSIGNMENT OF ASSIGNORS INTEREST…	SYNTHON IP INC.,CATHARPIN,VA,US SYNTHON IP INC.|P.O. BOX 161 CATHARPIN VIRGINIA 20143 SYNTHON IP INC. SYNTHON BV 2005-03-17 2005 016026/0687 2005-05-18 2005 ASSIGNMENT OF ASSIGNORS INTEREST (SEE DOCUMENT FOR DETAILS). MARK R. BUSCHER P.O. BOX 161 CATHARPIN, VA 20143 | SYNTHON BV,NL 6545 CM NIJMEGEN,NL SYNTHON BV|MICROWEG 22 NL 6545 CM NIJMEGEN NETHERLANDS SYNTHON BV ETTEMA, GERRIT J.B. 2003-01-06…	E2			6	99	US2001331742P,2001-11-21
	US20030035832A1	Solid oral dosage forms of valsartan	The present invention is concerned with solid oral dosage forms of comprising a) an active agent selected from valsartan and optionally HCTZ , and b) Pharmaceutically acceptable additives suitable for the preparation of solid oral dosage forms by compression methods.	2002-09-20	US2002251009A	GB199613470A | WO1997EP3172A | US1999202805A | US2001920159A	1996-06-27 | 1997-06-18 | 1999-05-07 | 2001-08-01	2003-02-20		US20030035832A1 | AR59324A2 | AR8618A1 | AT276750T | AT371449T | AT446749T | AU199733402A | AU724998B2 | BR199709956A | CA2259148A1 | CA2259148C | CA2673462A1 | CA2673462C | CN1133427C | CN1232394A | CN1475207A | CN1475207B | CN1951372A | CN1951372B | CO4870755A1 | CY2553B1 | CZ199804269A3 | CZ296850B6 | DE69730834D1 | DE69730834T2 | DE69738089D1 | DE69738089T2 | DE69739642D1 | DK1410797T3 | DK17…	WO1997049394A2 | ZA199705673A | AU199733402A | NO199806056A | CZ199804269A3 | EP914119A2 | SK199801784A3 | BR199709956A | CN1232394A | JP2000506540A | AU724998B | MX199900263A | NZ333385A | KR2000022111A | US6294197B1 | US6485745B1 | TW473394B | US20030035832A1 | RU2203054C2 | JP2003231634A | EP1410797A1 | CN1475207A | HU200203374A2 | NO317181B1 | EP914119B1 | NZ524346A | NO200401287A | DE6973083…	Solid oral dosage form of valsartan used to treat e.g. hypertension, heart failure, angina, myocardial infarction, arteriosclerosis or diabetic nephropathy	19960828GB199613470D0	2012-08-21 RF REISSUE APPLICATION FILED 2012-04-24 | 2012-07-25 FPAY FEE PAYMENT + | 2011-03-23 AS ASSIGNMENT NOVARTIS PHARMACEUTICALS CORPORATION, NEW JERSEY ASSIGNMENT OF ASSIGNORS INTEREST;ASSIGNOR:NOVARTIS AG;REEL/FRAME:026002/0790 2011-03-17 | 2008-08-13 FPAY FEE PAYMENT + | 2005-10-04 RF REISSUE APPLICATION FILED 2005-08-19	NOVARTIS PHARMACEUTICALS CORPORATION,EAST HANOVER,NJ,US NOVARTIS PHARMACEUTICALS CORPORATION|ONE HEALTH PLAZA EAST HANOVER NEW JERSEY 07936 NOVARTIS PHARMACEUTICALS CORPORATION NOVARTIS AG 2011-03-17 2011 026002/0790 2011-03-23 2011 ASSIGNMENT OF ASSIGNORS INTEREST (SEE DOCUMENT FOR DETAILS). LINDA ADAMS NOVARTIS PHARMACEUTICALS CORP. ONE HEALTH PLAZA EAST HANOVER, NJ 07936				78	81	US2001920159A,2001-08-01 | WO1997EP3172A,1997-06-18 | US1999202805A,1999-05-07
	US6858228B2	Solid oral dosage forms of valsartan	The present invention is concerned with solid oral dosage forms of comprising a) an active agent selected from valsartan and optionally HCTZ, and b) Pharmaceutically acceptable additives suitable for the preparation of solid oral dosage forms by compression methods.	2002-09-20	US2002251009A	GB199613470A | WO1997EP3172A | US1999202805A | US2001920159A	1996-06-27 | 1997-06-18 | 1999-05-07 | 2001-08-01	2005-02-22	Novartis AG,Basel,CH	US6858228B2 | AR59324A2 | AR8618A1 | AT276750T | AT371449T | AT446749T | AU199733402A | AU724998B2 | BR199709956A | CA2259148A1 | CA2259148C | CA2673462A1 | CA2673462C | CN1133427C | CN1232394A | CN1475207A | CN1475207B | CN1951372A | CN1951372B | CO4870755A1 | CY2553B1 | CZ199804269A3 | CZ296850B6 | DE69730834D1 | DE69730834T2 | DE69738089D1 | DE69738089T2 | DE69739642D1 | DK1410797T3 | DK176720…	WO1997049394A2 | ZA199705673A | AU199733402A | NO199806056A | CZ199804269A3 | EP914119A2 | SK199801784A3 | BR199709956A | CN1232394A | JP2000506540A | AU724998B | MX199900263A | NZ333385A | KR2000022111A | US6294197B1 | US6485745B1 | TW473394B | US20030035832A1 | RU2203054C2 | JP2003231634A | EP1410797A1 | CN1475207A | HU200203374A2 | NO317181B1 | EP914119B1 | NZ524346A | NO200401287A | DE6973083…	Solid oral dosage form of valsartan used to treat e.g. hypertension, heart failure, angina, myocardial infarction, arteriosclerosis or diabetic nephropathy	19960828GB199613470D0	2012-08-21 RF REISSUE APPLICATION FILED 2012-04-24 | 2012-07-25 FPAY FEE PAYMENT + | 2011-03-23 AS ASSIGNMENT NOVARTIS PHARMACEUTICALS CORPORATION, NEW JERSEY ASSIGNMENT OF ASSIGNORS INTEREST;ASSIGNOR:NOVARTIS AG;REEL/FRAME:026002/0790 2011-03-17 | 2008-08-13 FPAY FEE PAYMENT + | 2005-10-04 RF REISSUE APPLICATION FILED 2005-08-19	NOVARTIS PHARMACEUTICALS CORPORATION,EAST HANOVER,NJ,US NOVARTIS PHARMACEUTICALS CORPORATION|ONE HEALTH PLAZA EAST HANOVER NEW JERSEY 07936 NOVARTIS PHARMACEUTICALS CORPORATION NOVARTIS AG 2011-03-17 2011 026002/0790 2011-03-23 2011 ASSIGNMENT OF ASSIGNORS INTEREST (SEE DOCUMENT FOR DETAILS). LINDA ADAMS NOVARTIS PHARMACEUTICALS CORP. ONE HEALTH PLAZA EAST HANOVER, NJ 07936				78	81	US2001920159A,2001-08-01 | WO1997EP3172A,1997-06-18 | US0000202805A,0001-01-01
	US20030008904A1	Therapeutic combination	This invention relates to pharmaceutical combinations of amlodipine or a pharmaceutically acceptable acid addition salt thereof and atorvastatin or a pharmaceutically acceptable salt thereof, kits containing such combinations and methods of using such combinations to treat subjects suffering from angina pectoris, atherosclerosis, combined hypertension and hyperlipidemia and to treat subjects pres…	2002-08-07	US2002214058A	US199757275P | WO1998IB1225A | US2000512914A	1997-08-29 | 1998-08-11 | 2000-02-25	2003-01-09		US20030008904A1 | AP1225A | AP199801334D0 | AR12269A1 | AT277615T | AT332689T | AU199885548A | AU755636B2 | BG104177A | BG64665B1 | BR199812030A | CA2301732A1 | CA2301732C | CN101062035A | CN1268052A | CO4970694A1 | CZ200000511A3 | CZ301081B6 | DE69826683D1 | DE69826683T2 | DE69835245D1 | DE69835245T2 | DK1003503T3 | DK1491193T3 | DZ2596A1 | EA3549B1 | EP1003503A1 | EP1003503B1 | EP1468682A1 | EP…	WO1999011259A1 | AU199885548A | ZA199807844A | NO200000998A | EP1003503A1 | CZ200000511A3 | BR199812030A | CN1268052A | SK200000204A3 | HU200003656A2 | KR2001023498A | JP2001514222A | MX2000002087A | US6455574B1 | US20030008904A1 | AU755636B | NZ516818A | US20040048906A1 | JP2004210797A | EP1003503B1 | EP1468682A1 | DE69826683D1 | EP1491193A1 | TW592696B | CA2301732C | NZ527158A | ES2227865T3 | D…	Use of a synergistic combination of amlodipine and atorvastatin for treating angina pectoris and atherosclerosis	19980930AP199801334D0	2008-03-21 AS ASSIGNMENT AMI SEMICONDUCTOR, INC.,IDAHO PATENT RELEASE;ASSIGNOR:CREDIT SUISSE;REEL/FRAME:020679/0505 2008-03-17	AMI SEMICONDUCTOR INC.,POCATELLO,ID,US AMI SEMICONDUCTOR INC.|2300 BUCKSKIN ROAD POCATELLO IDAHO 83201 AMI SEMICONDUCTOR, INC. CREDIT SUISSE 2008-03-17 2008 020679/0505 2008-03-21 2008 PATENT RELEASE IP RESEARCH PLUS, INC. 21 TADCASTER CIRCLE ATTN: PENELOPE J.A. AGODOA WALDORF, MD 20602				51	85	WO1998IB1225A,1998-08-11 | US199757275P,1997-08-29 | US2000512914A,2000-02-25
	US20020094997A1	POLYMORPHS OF TELMISARTAN	The invention relates to polymorphs of 4'-[2-n-propyl-4-methyl-6-(1-methylbenzimid-azol-2-yl) benzimidazol-1-ylmethyl]biphenyl-2-carboxylic acid (INN: telmisartan), particularly polymorphic form B, mixtures of the polymorphs, processes for preparing telmisartan containing form B and the use thereof for preparing a pharmaceutical composition.	2001-11-16	US2001992621A	DE19901921A | US1999128311P | US2000480211A	1999-01-19 | 1999-04-08 | 2000-01-10	2002-07-18		US20020094997A1 | AR35475A1 | AT252564T | AU200022881A | AU765081B2 | BG105654A | BG65027B1 | BR200007584A | CA2352436A1 | CA2352436C | CN1144790C | CN1336920A | CO5150238A1 | CZ200102634A3 | CZ297412B6 | DE19901921A1 | DE19901921C2 | DE50004150D1 | DK1144386T3 | EA3065B1 | EE200100375A | EE4344B1 | EP1144386A1 | EP1144386B1 | ES2208265T3 | HK1041485A1 | HRP20010514A2 | HRP20010514B1 | HU20010514…	WO2000043370A1 | DE19901921A1 | AU200022881A | DE19901921C2 | EP1144386A1 | NO200103560A | CZ200102634A3 | BR200007584A | SK200101020A3 | US6358986B1 | KR2001101552A | CN1336920A | US6410742B1 | US20020094997A1 | HU200105148A2 | JP2002535315A | ZA200104771A | MX2001006995A | NZ513528A | AU765081B | EP1144386B1 | DE50004150D1 | ES2208265T3 | MX219881B | NO319823B1 | CN1144790C | IN200500372P3 | PH…	New, free-flowing, easily filtered polymorphic crystal modification B of telmisartan, useful as angiotensin antagonist e.g. for treating hypertension or cardiac insufficiency	20000727CA2352436A1	2013-12-19 FPAY FEE PAYMENT + | 2009-12-21 FPAY FEE PAYMENT + | 2005-12-16 FPAY FEE PAYMENT + | 2003-05-30 AS ASSIGNMENT BOEHRINGER INGELHEIM PHARMA GMBH & CO. KG, GERMANY CHANGE OF NAME;ASSIGNOR:BOEHRINGER INGELHEIM PHARMA KG;REEL/FRAME:014083/0173 2003-02-18	BOEHRINGER INGELHEIM PHARMA GMBH & CO. KG,INGELHEIM,DE BOEHRINGER INGELHEIM PHARMA GMBH & CO. KG|BINGER STRASSE 173 INGELHEIM GERMANY 55216 BOEHRINGER INGELHEIM PHARMA GMBH & CO. KG BOEHRINGER INGELHEIM PHARMA KG 2003-02-18 2003 014083/0173 2003-05-30 2003 CHANGE OF NAME (SEE DOCUMENT FOR DETAILS). BOEHRINGER INGELHEIM CORPORATION ROBERT P. RAYMOND 900 RIDGEBURY ROAD, P.O. BOX 368 RIDGEFIELD, CT …				40	53	US2000480211A,2000-01-10 | US1999128311P,1999-04-08
	US6410742B1	Polymorphs of telmisartan	The invention relates to polymorphs of 4'-[2-n-propyl-4-methyl-6-(l-methylbenzimid azol-2-yl)benzimidazol-1-ylmethyl]biphenyl-2-carboxylic acid (INN: telmisartan), particularly polymorphic form B, mixtures of the polymorphs, processes for preparing telmisartan containing form B and the use thereof for preparing a pharmaceutical composition.	2001-11-16	US2001992621A	DE19901921A | US1999128311P | US2000480211A	1999-01-19 | 1999-04-08 | 2000-01-10	2002-06-25	Boehringer Ingelheim Pharma KG,Ingelheim,DE	US6410742B1 | AR35475A1 | AT252564T | AU200022881A | AU765081B2 | BG105654A | BG65027B1 | BR200007584A | CA2352436A1 | CA2352436C | CN1144790C | CN1336920A | CO5150238A1 | CZ200102634A3 | CZ297412B6 | DE19901921A1 | DE19901921C2 | DE50004150D1 | DK1144386T3 | EA3065B1 | EE200100375A | EE4344B1 | EP1144386A1 | EP1144386B1 | ES2208265T3 | HK1041485A1 | HRP20010514A2 | HRP20010514B1 | HU200105148A2 …	WO2000043370A1 | DE19901921A1 | AU200022881A | DE19901921C2 | EP1144386A1 | NO200103560A | CZ200102634A3 | BR200007584A | SK200101020A3 | US6358986B1 | KR2001101552A | CN1336920A | US6410742B1 | US20020094997A1 | HU200105148A2 | JP2002535315A | ZA200104771A | MX2001006995A | NZ513528A | AU765081B | EP1144386B1 | DE50004150D1 | ES2208265T3 | MX219881B | NO319823B1 | CN1144790C | IN200500372P3 | PH…	New, free-flowing, easily filtered polymorphic crystal modification B of telmisartan, useful as angiotensin antagonist e.g. for treating hypertension or cardiac insufficiency	20000727CA2352436A1	2013-12-19 FPAY FEE PAYMENT + | 2009-12-21 FPAY FEE PAYMENT + | 2005-12-16 FPAY FEE PAYMENT + | 2003-05-30 AS ASSIGNMENT BOEHRINGER INGELHEIM PHARMA GMBH & CO. KG, GERMANY CHANGE OF NAME;ASSIGNOR:BOEHRINGER INGELHEIM PHARMA KG;REEL/FRAME:014083/0173 2003-02-18	BOEHRINGER INGELHEIM PHARMA GMBH & CO. KG,INGELHEIM,DE BOEHRINGER INGELHEIM PHARMA GMBH & CO. KG|BINGER STRASSE 173 INGELHEIM GERMANY 55216 BOEHRINGER INGELHEIM PHARMA GMBH & CO. KG BOEHRINGER INGELHEIM PHARMA KG 2003-02-18 2003 014083/0173 2003-05-30 2003 CHANGE OF NAME (SEE DOCUMENT FOR DETAILS). BOEHRINGER INGELHEIM CORPORATION ROBERT P. RAYMOND 900 RIDGEBURY ROAD, P.O. BOX 368 RIDGEFIELD, CT …				40	53	US1999128311P,1999-04-08
	CA2428647A1	SYNERGISTIC COMBINATIONS COMPRISING A RENIN INHIBITOR FOR CARDIOVASCULAR DISEASES | COMPLEXES MEDICAMENTEUX COMPORTANT UN INHIBITEUR DE LA RENINE ET SERVANT AU TRAITEMENT DE MALADIES CARDIOVASCULAIRES	The invention relates to a combination comprising the renin inhibitor of formula (I) or a pharmaceutically acceptable salt thereof. L'invention se rapporte à un complexe médicamenteux comportant l'inhibiteur de la rénine de la formule (I), ainsi qu'à un sel pharmaceutiquement acceptable dudit complexe.	2001-11-15	CA2428647A	GB200028151A | WO2001EP13241A	2000-11-17 | 2001-11-15	2002-05-23	NOVARTIS AG,BASEL,CH	CA2428647A1 | AT317692T | AT397445T | AU2002223680B2 | AU200223680A | BR200115411A | CA2763223A1 | CN100404024C | CN101091703A | CN101264072A | CN101264073A | CN1474690A | CZ299749B6 | DE122009000021I1 | DE60117295D1 | DE60117295T2 | DE60134349D1 | DK1341533T3 | DK1602370T3 | DK1915993T3 | EC2003SP4603A | EP1341533A1 | EP1341533B1 | EP1602370A2 | EP1602370A3 | EP1602370B1 | EP1915993A1 | EP191599…			20010103GB200028151D0	2006-11-09 EEER EXAMINATION REQUEST +							CA2428647A,2001-11-15
	CA2763223A1	SYNERGISTIC COMBINATIONS COMPRISING A RENIN INHIBITOR FOR CARDIOVASCULAR DISEASES | COMPLEXES MEDICAMENTEUX COMPORTANT UN INHIBITEUR DE LA RENINE ET SERVANT AU TRAITEMENT DE MALADIES CARDIOVASCULAIRES	The invention relates to a combination comprising the renin inhibitor of formula (I) or a pharmaceutically acceptable salt thereof.	2001-11-15	CA2763223A	GB200028151A | CA2428647A	2000-11-17 | 2001-11-15	2002-05-23	NOVARTIS AG,BASEL,CH	CA2763223A1 | AT317692T | AT397445T | AU2002223680B2 | AU200223680A | BR200115411A | CA2428647A1 | CN100404024C | CN101091703A | CN101264072A | CN101264073A | CN1474690A | CZ299749B6 | DE122009000021I1 | DE60117295D1 | DE60117295T2 | DE60134349D1 | DK1341533T3 | DK1602370T3 | DK1915993T3 | EC2003SP4603A | EP1341533A1 | EP1341533B1 | EP1602370A2 | EP1602370A3 | EP1602370B1 | EP1915993A1 | EP191599…	WO2002040007A1 | AU200223680A | NO200302233A | CZ200301341A3 | EP1341533A1 | HU200301841A2 | KR2003051753A | SK200300584A3 | CN1474690A | JP2004513920A | ZA200303497A | BR200115411A | MX2003004358A | NZ525795A | AU2002223680B2 | IN200300724P4 | EP1602370A2 | EP1341533B1 | DE60117295D1 | ES2256335T3 | DE60117295T2 | MX239582B | NZ537691A | SG135969A1 | RU2310443C2 | NZ550897A | CN101091703A | EP19…	Synergistic composition comprises renin inhibitor and active agent e.g. angiotensin converting enzyme inhibitor for the treatment of e.g. hypertension	20010103GB200028151D0	2011-12-28 EEER EXAMINATION REQUEST +					78	88	CA2428647A,2001-11-15
	US6485745B1	Solid oral dosage forms of valsartan	The present invention is concerned with solid oral dosage forms of comprising a) an active agent selected from valsartan and optionally HCTZ , and b) Pharmaceutically acceptable additives suitable for the preparation of solid oral dosage forms by compression methods.	2001-08-01	US2001920159A	GB199613470A | WO1997EP3172A | US1999202805A	1996-06-27 | 1997-06-18 | 1999-05-07	2002-11-26	Novartis AG,Basel,CH	US6485745B1 | AR59324A2 | AR8618A1 | AT276750T | AT371449T | AT446749T | AU199733402A | AU724998B2 | BR199709956A | CA2259148A1 | CA2259148C | CA2673462A1 | CA2673462C | CN1133427C | CN1232394A | CN1475207A | CN1475207B | CN1951372A | CN1951372B | CO4870755A1 | CY2553B1 | CZ199804269A3 | CZ296850B6 | DE69730834D1 | DE69730834T2 | DE69738089D1 | DE69738089T2 | DE69739642D1 | DK1410797T3 | DK176720…	WO1997049394A2 | ZA199705673A | AU199733402A | NO199806056A | CZ199804269A3 | EP914119A2 | SK199801784A3 | BR199709956A | CN1232394A | JP2000506540A | AU724998B | MX199900263A | NZ333385A | KR2000022111A | US6294197B1 | US6485745B1 | TW473394B | US20030035832A1 | RU2203054C2 | JP2003231634A | EP1410797A1 | CN1475207A | HU200203374A2 | NO317181B1 | EP914119B1 | NZ524346A | NO200401287A | DE6973083…	Solid oral dosage form of valsartan used to treat e.g. hypertension, heart failure, angina, myocardial infarction, arteriosclerosis or diabetic nephropathy	19960828GB199613470D0	2015-01-13 FP EXPIRED DUE TO FAILURE TO PAY MAINTENANCE FEE - 2014-11-26 | 2014-11-26 LAPS LAPSE FOR FAILURE TO PAY MAINTENANCE FEES - | 2014-07-03 REMI MAINTENANCE FEE REMINDER MAILED | 2011-03-23 AS ASSIGNMENT NOVARTIS PHARMACEUTICALS CORPORATION, NEW JERSEY ASSIGNMENT OF ASSIGNORS INTEREST;ASSIGNOR:NOVARTIS AG;REEL/FRAME:026002/0790 2011-03-17 | 2010-05-03 FPAY FEE PAYMENT + | 2006-04-30 FPAY …	NOVARTIS PHARMACEUTICALS CORPORATION,EAST HANOVER,NJ,US NOVARTIS PHARMACEUTICALS CORPORATION|ONE HEALTH PLAZA EAST HANOVER NEW JERSEY 07936 NOVARTIS PHARMACEUTICALS CORPORATION NOVARTIS AG 2011-03-17 2011 026002/0790 2011-03-23 2011 ASSIGNMENT OF ASSIGNORS INTEREST (SEE DOCUMENT FOR DETAILS). LINDA ADAMS NOVARTIS PHARMACEUTICALS CORP. ONE HEALTH PLAZA EAST HANOVER, NJ 07936	CC | E3			78	81	WO1997WO3172A,1997-01-01 | US0000202805A,0001-01-01
	US20010049384A1	Method of treatment and pharmaceutical composition	The invention relates to a method for the treatment or prevention of a condition or disease selected from the group consisting of hypertension, (acute and chronic) congestive heart failure, left ventricular dysfunction and hypertrophic cardiomyopathy, myocardial infarction and its sequelae, supraventricular and ventricular arrhythmias, atrial fibrillation or atrial flutter, atherosclerosis, angin…	2001-01-09	US2001757413A	US1999349654A	1999-07-08	2001-12-06		US20010049384A1 | US6204281B1 | US6395728B2	WO2000002543A2 | AU199950349A | NO200100113A | BR199912021A | EP1096932A2 | US6204281B1 | CZ200100087A3 | SK200100031A3 | CN1312715A | US20010049384A1 | KR2001079517A | MX2001000322A | HU200102828A2 | ZA200100232A | US6395728B2 | JP2002520274A | AU753486B | NZ509260A | AU2003200032A1 | KR2004078140A | RU2243768C2 | NZ527598A | IN200100016P4 | CN1733307A | CN1234357C | AU2003200032B2 | KR550167B1 …	Composition for treating e.g. hypertension and myocardial infarction comprises AT1 antagonist comprising valsartan and calcium channel blocker	20010320US6204281B1	2013-10-30 FPAY FEE PAYMENT + | 2011-03-23 AS ASSIGNMENT NOVARTIS PHARMACEUTICALS CORPORATION, NEW JERSEY ASSIGNMENT OF ASSIGNORS INTEREST;ASSIGNOR:NOVARTIS AG;REEL/FRAME:026002/0790 2011-03-17 | 2009-10-28 FPAY FEE PAYMENT + | 2005-10-30 FPAY FEE PAYMENT +	NOVARTIS PHARMACEUTICALS CORPORATION,EAST HANOVER,NJ,US NOVARTIS PHARMACEUTICALS CORPORATION|ONE HEALTH PLAZA EAST HANOVER NEW JERSEY 07936 NOVARTIS PHARMACEUTICALS CORPORATION NOVARTIS AG 2011-03-17 2011 026002/0790 2011-03-23 2011 ASSIGNMENT OF ASSIGNORS INTEREST (SEE DOCUMENT FOR DETAILS). LINDA ADAMS NOVARTIS PHARMACEUTICALS CORP. ONE HEALTH PLAZA EAST HANOVER, NJ 07936				51	86	US1999349654A,1999-07-08
	US6395728B2	Method of treatment and pharmaceutical composition	The invention relates to a method for the treatment or prevention of a condition or disease selected from the group consisting of hypertension, (acute and chronic) congestive heart failure, left ventricular dysfunction and hypertrophic cardiomyopathy, myocardial infarction and its sequelae, supraventricular and ventricular arrhythmias, atrial fibrillation or atrial flutter, atherosclerosis, angin…	2001-01-09	US2001757413A	US1999349654A	1999-07-08	2002-05-28	Novartis AG,Basel,CH	US6395728B2 | US20010049384A1 | US6204281B1	WO2000002543A2 | AU199950349A | NO200100113A | BR199912021A | EP1096932A2 | US6204281B1 | CZ200100087A3 | SK200100031A3 | CN1312715A | US20010049384A1 | KR2001079517A | MX2001000322A | HU200102828A2 | ZA200100232A | US6395728B2 | JP2002520274A | AU753486B | NZ509260A | AU2003200032A1 | KR2004078140A | RU2243768C2 | NZ527598A | IN200100016P4 | CN1733307A | CN1234357C | AU2003200032B2 | KR550167B1 …	Composition for treating e.g. hypertension and myocardial infarction comprises AT1 antagonist comprising valsartan and calcium channel blocker	20010320US6204281B1	2013-10-30 FPAY FEE PAYMENT + | 2011-03-23 AS ASSIGNMENT NOVARTIS PHARMACEUTICALS CORPORATION, NEW JERSEY ASSIGNMENT OF ASSIGNORS INTEREST;ASSIGNOR:NOVARTIS AG;REEL/FRAME:026002/0790 2011-03-17 | 2009-10-28 FPAY FEE PAYMENT + | 2005-10-30 FPAY FEE PAYMENT +	NOVARTIS PHARMACEUTICALS CORPORATION,EAST HANOVER,NJ,US NOVARTIS PHARMACEUTICALS CORPORATION|ONE HEALTH PLAZA EAST HANOVER NEW JERSEY 07936 NOVARTIS PHARMACEUTICALS CORPORATION NOVARTIS AG 2011-03-17 2011 026002/0790 2011-03-23 2011 ASSIGNMENT OF ASSIGNORS INTEREST (SEE DOCUMENT FOR DETAILS). LINDA ADAMS NOVARTIS PHARMACEUTICALS CORP. ONE HEALTH PLAZA EAST HANOVER, NJ 07936				51	86
	US6455574B1	Therapeutic combination	This invention relates to pharmaceutical combinations of amlodipine or a pharmaceutically acceptable acid addition salt thereof and atorvastatin or a pharmaceutically acceptable salt thereof, kits containing such combinations and methods of using such combinations to treat subjects suffering from angina pectoris, atherosclerosis, combined hypertension and hyperlipidemia and to treat subjects pres…	2000-02-25	US2000512914A	US199757275P | WO1998IB1225A	1997-08-29 | 1998-08-11	2002-09-24	Pfizer Inc.,New York,NY	US6455574B1 | AP1225A | AP199801334D0 | AR12269A1 | AT277615T | AT332689T | AU199885548A | AU755636B2 | BG104177A | BG64665B1 | BR199812030A | CA2301732A1 | CA2301732C | CN101062035A | CN1268052A | CO4970694A1 | CZ200000511A3 | CZ301081B6 | DE69826683D1 | DE69826683T2 | DE69835245D1 | DE69835245T2 | DK1003503T3 | DK1491193T3 | DZ2596A1 | EA3549B1 | EP1003503A1 | EP1003503B1 | EP1468682A1 | EP1491…	WO1999011259A1 | AU199885548A | ZA199807844A | NO200000998A | EP1003503A1 | CZ200000511A3 | BR199812030A | CN1268052A | SK200000204A3 | HU200003656A2 | KR2001023498A | JP2001514222A | MX2000002087A | US6455574B1 | US20030008904A1 | AU755636B | NZ516818A | US20040048906A1 | JP2004210797A | EP1003503B1 | EP1468682A1 | DE69826683D1 | EP1491193A1 | TW592696B | CA2301732C | NZ527158A | ES2227865T3 | D…	Use of a synergistic combination of amlodipine and atorvastatin for treating angina pectoris and atherosclerosis	19980930AP199801334D0	2014-02-25 FPAY FEE PAYMENT + | 2011-12-13 B1 REEXAMINATION CERTIFICATE FIRST REEXAMINATION + THE PATENTABILITY OF CLAIMS 1-12 IS CONFIRMED. | 2010-09-21 RR REQUEST FOR REEXAMINATION FILED + 2010-06-17 | 2010-02-19 FPAY FEE PAYMENT + | 2006-02-28 FPAY FEE PAYMENT +		C			51	85	WO1998IB1225A,1998-08-11 | US199757275P,1997-08-29
	US6455574C1			2000-02-25	US2000512914A	US199757275P | WO1998IB1225A | US2000512914A | US2002214058A | US2003637781A | US2006448100A | US2006499753A | US2009427420A | US2010721065A | US201191622A | US13445339A | US13743897A | US14049286A	1997-08-29 | 1998-08-11 | 2000-02-25 | 2002-08-07 | 2003-08-08 | 2006-06-07 | 2006-08-07 | 2009-04-21 | 2010-03-10 | 2011-04-21 | 2012-04-12 | 2013-01-17 | 2013-10-09	2011-12-13			WO1999011259A1 | AU199885548A | ZA199807844A | NO200000998A | EP1003503A1 | CZ200000511A3 | BR199812030A | CN1268052A | SK200000204A3 | HU200003656A2 | KR2001023498A | JP2001514222A | MX2000002087A | US6455574B1 | US20030008904A1 | AU755636B | NZ516818A | US20040048906A1 | JP2004210797A | EP1003503B1 | EP1468682A1 | DE69826683D1 | EP1491193A1 | TW592696B | CA2301732C | NZ527158A | ES2227865T3 | D…	Use of a synergistic combination of amlodipine and atorvastatin for treating angina pectoris and atherosclerosis							51	85
	US6358986B1	Polymorphs of telmisartan	The invention relates to polymorphs of 4'-[2-n-propyl-4-methyl-6-(1-methylbenzimid-azol-2-yl)benzimidazol-1-ylmethyl]biphenyl-2-carboxylic acid (INN: telmisartan), particularly polymorphic form B, mixtures of the polymorphs, processes for preparing telmisartan containing form B and the use thereof for preparing a pharmaceutical composition.	2000-01-10	US2000480211A	DE19901921A | US1999128311P	1999-01-19 | 1999-04-08	2002-03-19	Boehringer Ingelheim Pharma KG,Ingelheim,DE	US6358986B1 | AR35475A1 | AT252564T | AU200022881A | AU765081B2 | BG105654A | BG65027B1 | BR200007584A | CA2352436A1 | CA2352436C | CN1144790C | CN1336920A | CO5150238A1 | CZ200102634A3 | CZ297412B6 | DE19901921A1 | DE19901921C2 | DE50004150D1 | DK1144386T3 | EA3065B1 | EE200100375A | EE4344B1 | EP1144386A1 | EP1144386B1 | ES2208265T3 | HK1041485A1 | HRP20010514A2 | HRP20010514B1 | HU200105148A2 …	WO2000043370A1 | DE19901921A1 | AU200022881A | DE19901921C2 | EP1144386A1 | NO200103560A | CZ200102634A3 | BR200007584A | SK200101020A3 | US6358986B1 | KR2001101552A | CN1336920A | US6410742B1 | US20020094997A1 | HU200105148A2 | JP2002535315A | ZA200104771A | MX2001006995A | NZ513528A | AU765081B | EP1144386B1 | DE50004150D1 | ES2208265T3 | MX219881B | NO319823B1 | CN1144790C | IN200500372P3 | PH…	New, free-flowing, easily filtered polymorphic crystal modification B of telmisartan, useful as angiotensin antagonist e.g. for treating hypertension or cardiac insufficiency	20000727CA2352436A1	2013-09-12 FPAY FEE PAYMENT + | 2009-09-14 FPAY FEE PAYMENT + | 2005-09-16 FPAY FEE PAYMENT + | 2003-05-30 AS ASSIGNMENT BOEHRINGER INGELHEIM PHARMA GMBH & CO. KG, GERMANY CHANGE OF NAME;ASSIGNOR:BOEHRINGER INGELHEIM PHARMA KG;REEL/FRAME:014083/0173 2003-02-18 | 2000-03-27 AS ASSIGNMENT BOEHRINGER INGELHEIM PHARMA KG, GERMANY ASSIGNMENT OF ASSIGNORS INTEREST;ASSIGNOR:HEINRICH SCHNEIDER, DECEASED …	BOEHRINGER INGELHEIM PHARMA GMBH & CO. KG,INGELHEIM,DE BOEHRINGER INGELHEIM PHARMA GMBH & CO. KG|BINGER STRASSE 173 INGELHEIM GERMANY 55216 BOEHRINGER INGELHEIM PHARMA GMBH & CO. KG BOEHRINGER INGELHEIM PHARMA KG 2003-02-18 2003 014083/0173 2003-05-30 2003 CHANGE OF NAME (SEE DOCUMENT FOR DETAILS). BOEHRINGER INGELHEIM CORPORATION ROBERT P. RAYMOND 900 RIDGEBURY ROAD, P.O. BOX 368 RIDGEFIELD, CT …				40	53	US1999128311P,1999-04-08
	CA2352436A1	POLYMORPHS OF TELMISARTAN, PROCESSES FOR PREPARING THEM AND THEIR USE IN THE PREPARATION OF A PHARMACEUTICAL | POLYMORPHES DE TELMISARTANE, PROCEDES PERMETTANT DE LES PREPARER ET LEUR UTILISAITON POUR PREPARER UN MEDICAMENT | POLYMORPHS OF TELMISARTAN, PROCESSES FOR PREPARING THEM AND THEIR USE IN THE PREPARATION OF A PHARMACEUTICAL COMPOSITION	The invention relates to polymorphs of 4'-[2-n-propyl-4-methyl-6(1- methylbenzimidazol -2-yl) benzimidazol -1-ylmethyl] biphenyl-2-carboxylic acid (INN: telmisartan), and in particular the polymorphous form B of formula (I), characterized by an endothermic peak at 183 ~ 2~C during thermal analysis by differential scanning calorimetry. The invention also relates to mixtures of said polymorphs, met…	2000-01-07	CA2352436A	DE19901921A | WO2000EP65A	1999-01-19 | 2000-01-07	2000-07-27	BOEHRINGER INGELHEIM PHARMA KG,INGELHEIM AM RHEIN,DE	CA2352436A1 | AR35475A1 | AT252564T | AU200022881A | AU765081B2 | BG105654A | BG65027B1 | BR200007584A | CA2352436C | CN1144790C | CN1336920A | CO5150238A1 | CZ200102634A3 | CZ297412B6 | DE19901921A1 | DE19901921C2 | DE50004150D1 | DK1144386T3 | EA3065B1 | EE200100375A | EE4344B1 | EP1144386A1 | EP1144386B1 | ES2208265T3 | HK1041485A1 | HRP20010514A2 | HRP20010514B1 | HU200105148A2 | HU200105148A…			20000727CA2352436A1	2005-01-04 EEER EXAMINATION REQUEST +							CA2352436A,2000-01-07
	CA2352436C	POLYMORPHS OF TELMISARTAN, PROCESSES FOR PREPARING THEM AND THEIR USE IN THE PREPARATION OF A PHARMACEUTICAL COMPOSITION | POLYMORPHES DE TELMISARTANE, PROCEDES PERMETTANT DE LES PREPARER ET LEUR UTILISAITON POUR PREPARER UN MEDICAMENT	The invention relates to polymorphs of 4'-[2-n-propyl-4methyl-6-(1-methylbenzimidazol-2-yl)benzimidazol-1ylmethyl]biphenyl-2-carboxylic acid (INN: telmisartan), particularly polymorphic form B, mixtures of the polymorphs, processes for preparing telmisartan containing form B and the use thereof for preparing a pharmaceutical composition. The invention relates to polymorphs of 4'-[2-n-propyl-4-met…	2000-01-07	CA2352436A	DE19901921A | WO2000EP65A	1999-01-19 | 2000-01-07	2010-03-23	BOEHRINGER INGELHEIM PHARMA GMBH & CO. KG,INGELHEIM,DE	CA2352436C | AR35475A1 | AT252564T | AU200022881A | AU765081B2 | BG105654A | BG65027B1 | BR200007584A | CA2352436A1 | CN1144790C | CN1336920A | CO5150238A1 | CZ200102634A3 | CZ297412B6 | DE19901921A1 | DE19901921C2 | DE50004150D1 | DK1144386T3 | EA3065B1 | EE200100375A | EE4344B1 | EP1144386A1 | EP1144386B1 | ES2208265T3 | HK1041485A1 | HRP20010514A2 | HRP20010514B1 | HU200105148A2 | HU200105148A…	WO2000043370A1 | DE19901921A1 | AU200022881A | DE19901921C2 | EP1144386A1 | NO200103560A | CZ200102634A3 | BR200007584A | SK200101020A3 | US6358986B1 | KR2001101552A | CN1336920A | US6410742B1 | US20020094997A1 | HU200105148A2 | JP2002535315A | ZA200104771A | MX2001006995A | NZ513528A | AU765081B | EP1144386B1 | DE50004150D1 | ES2208265T3 | MX219881B | NO319823B1 | CN1144790C | IN200500372P3 | PH…	New, free-flowing, easily filtered polymorphic crystal modification B of telmisartan, useful as angiotensin antagonist e.g. for treating hypertension or cardiac insufficiency	20000727CA2352436A1	2005-01-04 EEER EXAMINATION REQUEST +					40	53	CA2352436A,2000-01-07 | ,
	US6204281B1	Method of treatment and pharmaceutical composition	The invention relates to a method for the treatment or prevention of a condition or disease selected from the group consisting of hypertension, (acute and chronic) congestive heart failure, left ventricular dysfunction and hypertrophic cardiomyopathy, myocardial infarction and its sequelae, supraventricular and ventricular arrhythmias, atrial fibrillation or atrial flutter, atherosclerosis, angin…	1999-07-08	US1999349654A	US1998155262P	1998-07-10	2001-03-20	Novartis AG,Basel,CH	US6204281B1 | US20010049384A1 | US6395728B2	WO2000002543A2 | AU199950349A | NO200100113A | BR199912021A | EP1096932A2 | US6204281B1 | CZ200100087A3 | SK200100031A3 | CN1312715A | US20010049384A1 | KR2001079517A | MX2001000322A | HU200102828A2 | ZA200100232A | US6395728B2 | JP2002520274A | AU753486B | NZ509260A | AU2003200032A1 | KR2004078140A | RU2243768C2 | NZ527598A | IN200100016P4 | CN1733307A | CN1234357C | AU2003200032B2 | KR550167B1 …	Composition for treating e.g. hypertension and myocardial infarction comprises AT1 antagonist comprising valsartan and calcium channel blocker	20010320US6204281B1	2012-08-22 FPAY FEE PAYMENT + | 2011-03-23 AS ASSIGNMENT NOVARTIS PHARMACEUTICALS CORPORATION, NEW JERSEY ASSIGNMENT OF ASSIGNORS INTEREST;ASSIGNOR:NOVARTIS AG;REEL/FRAME:026002/0790 2011-03-17 | 2008-09-11 FPAY FEE PAYMENT + | 2004-09-01 FPAY FEE PAYMENT + | 2001-01-16 AS ASSIGNMENT NOVARTIS AG, SWITZERLAND ASSIGNMENT OF ASSIGNORS INTEREST;ASSIGNORS:WEBB, RANDY LEE;GASPARO, MARC DE;REEL/FRAME:01…	NOVARTIS PHARMACEUTICALS CORPORATION,EAST HANOVER,NJ,US NOVARTIS PHARMACEUTICALS CORPORATION|ONE HEALTH PLAZA EAST HANOVER NEW JERSEY 07936 NOVARTIS PHARMACEUTICALS CORPORATION NOVARTIS AG 2011-03-17 2011 026002/0790 2011-03-23 2011 ASSIGNMENT OF ASSIGNORS INTEREST (SEE DOCUMENT FOR DETAILS). LINDA ADAMS NOVARTIS PHARMACEUTICALS CORP. ONE HEALTH PLAZA EAST HANOVER, NJ 07936 | NOVARTIS AG,BASEL,CH…				51	86	US1998155262P,1998-07-10
	US6294197B1	Solid oral dosage forms of valsartan	The present invention is concerned with solid dosage forms comprising a) valsartan and optionally HCTZ, and b) pharmaceutically acceptable additives suitable for the preparation of solid oral dosage forms by compression methods.	1999-05-07	US1998202805A	GB199613470A | WO1997EP3172A	1996-06-27 | 1997-06-18	2001-09-25	Novartis AG,Basel,CH	US6294197B1 | AR59324A2 | AR8618A1 | AT276750T | AT371449T | AT446749T | AU199733402A | AU724998B2 | BR199709956A | CA2259148A1 | CA2259148C | CA2673462A1 | CA2673462C | CN1133427C | CN1232394A | CN1475207A | CN1475207B | CN1951372A | CN1951372B | CO4870755A1 | CY2553B1 | CZ199804269A3 | CZ296850B6 | DE69730834D1 | DE69730834T2 | DE69738089D1 | DE69738089T2 | DE69739642D1 | DK1410797T3 | DK176720…	WO1997049394A2 | ZA199705673A | AU199733402A | NO199806056A | CZ199804269A3 | EP914119A2 | SK199801784A3 | BR199709956A | CN1232394A | JP2000506540A | AU724998B | MX199900263A | NZ333385A | KR2000022111A | US6294197B1 | US6485745B1 | TW473394B | US20030035832A1 | RU2203054C2 | JP2003231634A | EP1410797A1 | CN1475207A | HU200203374A2 | NO317181B1 | EP914119B1 | NZ524346A | NO200401287A | DE6973083…	Solid oral dosage form of valsartan used to treat e.g. hypertension, heart failure, angina, myocardial infarction, arteriosclerosis or diabetic nephropathy	19960828GB199613470D0	2013-02-27 FPAY FEE PAYMENT + | 2011-03-23 AS ASSIGNMENT NOVARTIS PHARMACEUTICALS CORPORATION, NEW JERSEY ASSIGNMENT OF ASSIGNORS INTEREST;ASSIGNOR:NOVARTIS AG;REEL/FRAME:026002/0790 2011-03-17 | 2009-02-25 FPAY FEE PAYMENT + | 2005-02-28 FPAY FEE PAYMENT + | 2003-09-09 CC CERTIFICATE OF CORRECTION | 2001-07-30 AS ASSIGNMENT NOVARTIS AG, SWITZERLAND ASSIGNMENT OF ASSIGNORS INTEREST;ASSIGNORS:WAGN…	NOVARTIS PHARMACEUTICALS CORPORATION,EAST HANOVER,NJ,US NOVARTIS PHARMACEUTICALS CORPORATION|ONE HEALTH PLAZA EAST HANOVER NEW JERSEY 07936 NOVARTIS PHARMACEUTICALS CORPORATION NOVARTIS AG 2011-03-17 2011 026002/0790 2011-03-23 2011 ASSIGNMENT OF ASSIGNORS INTEREST (SEE DOCUMENT FOR DETAILS). LINDA ADAMS NOVARTIS PHARMACEUTICALS CORP. ONE HEALTH PLAZA EAST HANOVER, NJ 07936 | NOVARTIS AG,BASEL,CH…	CC			78	81
	CA2301732A1	THERAPEUTIC COMBINATIONS | COMBINAISONS THERAPEUTIQUES	This invention relates to pharmaceutical combinations of amlodipine or a pharmaceutically acceptable acid addition salt thereof and atorvastatin or a pharmaceutically acceptable salt thereof, kits containing such combinations and methods of using such combinations to treat subjects suffering from angina pectoris, atherosclerosis, combined hypertension and hyperlipidemia and to treat subjects pres…	1998-08-11	CA2301732A	US199757275P | WO1998IB1225A	1997-08-29 | 1998-08-11	1999-03-11	PFIZER	CA2301732A1 | AP1225A | AP199801334D0 | AR12269A1 | AT277615T | AT332689T | AU199885548A | AU755636B2 | BG104177A | BG64665B1 | BR199812030A | CA2301732C | CN101062035A | CN1268052A | CO4970694A1 | CZ200000511A3 | CZ301081B6 | DE69826683D1 | DE69826683T2 | DE69835245D1 | DE69835245T2 | DK1003503T3 | DK1491193T3 | DZ2596A1 | EA3549B1 | EP1003503A1 | EP1003503B1 | EP1468682A1 | EP1491193A1 | EP1491…			19980930AP199801334D0	2000-02-28 EEER EXAMINATION REQUEST +
	CA2301732C	THERAPEUTIC COMBINATIONS | COMBINAISONS THERAPEUTIQUES	This invention relates to pharmaceutical combinations of amlodipine or a pharmaceutically acceptable acid addition salt thereof and atorvastatin or a pharmaceutically acceptable salt thereof, kits containing such combinations and methods of using such combinations to treat subjects suffering from angina pectoris, atherosclerosis, combined hypertension and hyperlipidemia and to treat subjects pres…	1998-08-11	CA2301732A	US199757275P | WO1998IB1225A	1997-08-29 | 1998-08-11	2005-03-29	PFIZER PRODUCTS INC.,GROTON,CT,US	CA2301732C | AP1225A | AP199801334D0 | AR12269A1 | AT277615T | AT332689T | AU199885548A | AU755636B2 | BG104177A | BG64665B1 | BR199812030A | CA2301732A1 | CN101062035A | CN1268052A | CO4970694A1 | CZ200000511A3 | CZ301081B6 | DE69826683D1 | DE69826683T2 | DE69835245D1 | DE69835245T2 | DK1003503T3 | DK1491193T3 | DZ2596A1 | EA3549B1 | EP1003503A1 | EP1003503B1 | EP1468682A1 | EP1491193A1 | EP1491…	WO1999011259A1 | AU199885548A | ZA199807844A | NO200000998A | EP1003503A1 | CZ200000511A3 | BR199812030A | CN1268052A | SK200000204A3 | HU200003656A2 | KR2001023498A | JP2001514222A | MX2000002087A | US6455574B1 | US20030008904A1 | AU755636B | NZ516818A | US20040048906A1 | JP2004210797A | EP1003503B1 | EP1468682A1 | DE69826683D1 | EP1491193A1 | TW592696B | CA2301732C | NZ527158A | ES2227865T3 | D…	Use of a synergistic combination of amlodipine and atorvastatin for treating angina pectoris and atherosclerosis	19980930AP199801334D0	2000-02-28 EEER EXAMINATION REQUEST +					51	85	, | CA2301732A,1998-08-11
	US5969156A	Crystalline [R- (R*,R*)]-2-(4-Dfluorophenyl)- beta , delta -dihydroxy-5-(1-methylethyl)-3-phenyl-4-[(phenylamino)carbonyl]-1H-pyrrole-1-heptanoic acid hemi calcium salt (atorvastatin) | Crystalline [R-(R*,R*)]-2-(4-Dfluorophenyl)-&#946;,&#948;-dihydroxy-5-(1-methylethyl)-3-phenyl-4-[(phenylamino)carbonyl]-1H-pyrrole-1-heptanoic acid hemi calcium salt (atorvastatin)	Crystalline forms of atorvastatin and hydrates thereof are useful hypolipidemic and hypocholesterolemic agents. PCT No. PCT/US96/11368 Sec. 371 Date Oct. 2, 1997 Sec. 102(e) Date Oct. 2, 1997 PCT Filed Jul. 8, 1996 PCT Pub. No. WO97/03959 PCT Pub. Date Feb. 6, 1997Crystalline forms of atorvastatin and hydrates thereof are useful hypolipidemic and hypocholesterolemic agents. L'invention porte sur …	1997-10-02	US1997945812A	US19951452P | WO1996US11368A	1995-07-17 | 1996-07-08	1999-10-19	Warner Lambert Company,Morris Plains,NJ,US	US5969156A | AR3458A1 | AR3459A1 | AT208375T | AT284868T | AT8453U1 | AU199664842A | AU725424B2 | BG102187A | BG63630B1 | BR199609872A | CA2220018A1 | CA2220018C | CN1087288C | CN1190955A | CO4700443A1 | CY2358B1 | CZ199800121A3 | CZ294108B6 | CZ294695B6 | CZ294740B6 | DE69616808D1 | DE69616808T2 | DE69634054D1 | DE69634054T2 | DK1148049T3 | DK848705T3 | EA474B1 | EE199800015A | EE3606B1 | EP1148…	WO1997003959A1 | AU199664842A | ZA199606044A | NO199800207A | EP848705A1 | CZ199800121A3 | SK199800062A3 | BR199609872A | IL122118A | HU199900678A2 | JP11509230A | US5969156A | MX199709099A | KR1999029043A | AU725424B | NZ312907A | NZ507836A | CA2220018C | NO309898B1 | EP848705B1 | EP1148049A1 | DE69616808D1 | ES2167587T3 | JP03296564B2 | CN1190955A | TW486467B | JP2003073353A | MX214428B | KR389…	New crystalline forms of atorvastatin (hypolipidaemic agent) has good filtering and drying properties, and better purity and stability than amorphous form	19970203ZA199606044A_	2011-05-02 SULP SURCHARGE FOR LATE PAYMENT + | 2011-05-02 FPAY FEE PAYMENT + | 2007-03-20 FPAY FEE PAYMENT + | 2006-09-26 B1 REEXAMINATION CERTIFICATE FIRST REEXAMINATION + THE PATENTABILITY OF CLAIMS 3, 6-8, 14-15, 20-25, 30, 32-35, 37 AND 39-44 IS CONFIRMED. CLAIMS 1-2,4-5, 9, 28-29, 31, 36 AND 38 ARE DETERMINED TO BE PATENTABLE AS AMENDED. CLAIMS 10-13, 16-19 AND 26-27, DEPENDENT ON AN AMENDED…	WARNER-LAMBERT COMPANY,MORRIS PLAINS,NJ,US WARNER-LAMBERT COMPANY|201 TABOR ROAD MORRIS PLAINS NEW JERSEY 07950 WARNER-LAMBERT COMPANY BRIGGS, CHRISTOPHER A. 1995-08-25 1995 JENNINGS, REX A. 1995-08-25 1995 WADE, ROBERT 1995-08-25 1995 HARASAWA, KIKUKO 1995-09-04 1995 ICHIKAWA, SHIGERU 1995-09-04 1995 MINOHARA, KAZUO 1995-09-04 1995 NAKAGAWA, SHINSUKE 1995-09-04 1995 009229/0968 1998-05-29 1998 A…	C			53	47
	US5969156C1			1997-10-02	US1997945812A	US19951452P | WO1996US11368A | JP20028746A | US1997945812A | IN2007DE2357A	1995-07-17 | 1996-07-08 | 1996-07-08 | 1997-09-29 | 2007-11-12	2006-09-26			WO1997003959A1 | AU199664842A | ZA199606044A | NO199800207A | EP848705A1 | CZ199800121A3 | SK199800062A3 | BR199609872A | IL122118A | HU199900678A2 | JP11509230A | US5969156A | MX199709099A | KR1999029043A | AU725424B | NZ312907A | NZ507836A | CA2220018C | NO309898B1 | EP848705B1 | EP1148049A1 | DE69616808D1 | ES2167587T3 | JP03296564B2 | CN1190955A | TW486467B | JP2003073353A | MX214428B | KR389…	New crystalline forms of atorvastatin (hypolipidaemic agent) has good filtering and drying properties, and better purity and stability than amorphous form							53	47
	US6126971A	Stable oral CI-981 formulation and process for preparing same	An oral pharmaceutical composition is provided for treating hypercholestereolemia or hyperlipidemia containing an advantageous formulation for stabilizing the HMG-CoA coenzyme A inhibitor, CI-981 Hemi-Calcium, of formula (IA) ##STR1## with effective amounts of calcium carbonate. A method for preparing a CI-981 stabilizing composition is described. An oral pharmaceutical composition is provided fo…	1997-07-02	US1997886982A	US19935708A | US1994246919A	1993-01-19 | 1994-05-20	2000-10-03	Warner Lambert Company,Morris Plains,NJ,US	US6126971A | AT178794T | CA2150372A1 | CA2150372C | CY2128B1 | DE69324504D1 | DE69324504T2 | DK680320T3 | EP680320A1 | EP680320B1 | ES2133158T3 | GR3030359T3 | JP03254219B2 | JP8505640A | MX199400281A | SG45369A1 | US5686104A | WO1994016693A1	WO1994016693A1 | EP680320A1 | JP8505640A | BR1100081A3 | US5686104A | SG45369A1 | EP680320B1 | DE69324504D1 | ES2133158T3 | US6126971A | MX192869B | JP03254219B2 | CA2150372C | MX227832B	Stable oral compositions for treating hypercholesterolaemia and hyperlipidaemia contain HMG CoA inhibitor which is acid-sensitive substd. pyran ring opened acid form of substd. pyrrolyl carboxamide stabilised with metal salt, esp. calcium carbonate	19940729MX9400281A_	2012-03-23 FPAY FEE PAYMENT + | 2008-03-20 FPAY FEE PAYMENT + | 2004-03-29 FPAY FEE PAYMENT + | 2002-07-09 CC CERTIFICATE OF CORRECTION		CC			14	23	US19935708F,1993-03-10 | US1994246919A,1994-05-20
	CA2259148A1	SOLID ORAL DOSAGE FORMS OF VALSARTAN | FORMES POSOLOGIQUES SOLIDES DE VALSARTAN ADMINISTREES PAR VOIE ORALE	The present invention is concerned with solid oral dosage forms comprising of a) an active agent selected from valsartan and optionally HCTZ, and b) pharmaceutically acceptable additives suitable for the preparation of solid oral dosage forms by compression methods.	1997-06-18	CA2259148A	GB199613470A | WO1997EP3172A	1996-06-27 | 1997-06-18	1997-12-31	NOVARTIS AG	CA2259148A1 | AR59324A2 | AR8618A1 | AT276750T | AT371449T | AT446749T | AU199733402A | AU724998B2 | BR199709956A | CA2259148C | CA2673462A1 | CA2673462C | CN1133427C | CN1232394A | CN1475207A | CN1475207B | CN1951372A | CN1951372B | CO4870755A1 | CY2553B1 | CZ199804269A3 | CZ296850B6 | DE69730834D1 | DE69730834T2 | DE69738089D1 | DE69738089T2 | DE69739642D1 | DK1410797T3 | DK1767206T3 | DK914119…			19960828GB199613470D0	2002-06-18 EEER EXAMINATION REQUEST +
	CA2259148C	SOLID ORAL DOSAGE FORMS OF VALSARTAN | FORMES POSOLOGIQUES SOLIDES DE VALSARTAN ADMINISTREES PAR VOIE ORALE	The present invention is concerned with solid oral dosage forms comprising of a) an active agent selected from valsartan and optionally HCTZ, and b) pharmaceutically acceptable additives suitable for the preparation of solid oral dosage forms by compression methods.	1997-06-18	CA2259148A	GB199613470A | WO1997EP3172A	1996-06-27 | 1997-06-18	2009-09-29	NOVARTIS AG,BASEL,CH	CA2259148C | AR59324A2 | AR8618A1 | AT276750T | AT371449T | AT446749T | AU199733402A | AU724998B2 | BR199709956A | CA2259148A1 | CA2673462A1 | CA2673462C | CN1133427C | CN1232394A | CN1475207A | CN1475207B | CN1951372A | CN1951372B | CO4870755A1 | CY2553B1 | CZ199804269A3 | CZ296850B6 | DE69730834D1 | DE69730834T2 | DE69738089D1 | DE69738089T2 | DE69739642D1 | DK1410797T3 | DK1767206T3 | DK914119…	WO1997049394A2 | ZA199705673A | AU199733402A | NO199806056A | CZ199804269A3 | EP914119A2 | SK199801784A3 | BR199709956A | CN1232394A | JP2000506540A | AU724998B | MX199900263A | NZ333385A | KR2000022111A | US6294197B1 | US6485745B1 | TW473394B | US20030035832A1 | RU2203054C2 | JP2003231634A | EP1410797A1 | CN1475207A | HU200203374A2 | NO317181B1 | EP914119B1 | NZ524346A | NO200401287A | DE6973083…	Solid oral dosage form of valsartan used to treat e.g. hypertension, heart failure, angina, myocardial infarction, arteriosclerosis or diabetic nephropathy	19960828GB199613470D0	2002-06-18 EEER EXAMINATION REQUEST +					78	81	CA2259148A,1997-06-18 | ,
	CA2673462A1	SOLID ORAL DOSAGE FORMS OF VALSARTAN | FORMES POSOLOGIQUES SOLIDES DE VALSARTAN ADMINISTREES PAR VOIE ORALE	The invention is concerned with a tablet comprising: a) an active agent containing an effective amount of valsartan or a pharmaceutically acceptable salt thereof and an effective amount of hydrochlorothiazide (HCTZ); and b) pharmaceutically acceptable additives for preparation of tablets by compression methods; a process of forming the tablet and a coprimate, a granulate or a tablet produced by t…	1997-06-18	CA2673462A	GB199613470A | CA2259148A	1996-06-27 | 1997-06-18	1997-12-31	NOVARTIS AG,BASEL,CH	CA2673462A1 | AR59324A2 | AR8618A1 | AT276750T | AT371449T | AT446749T | AU199733402A | AU724998B2 | BR199709956A | CA2259148A1 | CA2259148C | CA2673462C | CN1133427C | CN1232394A | CN1475207A | CN1475207B | CN1951372A | CN1951372B | CO4870755A1 | CY2553B1 | CZ199804269A3 | CZ296850B6 | DE69730834D1 | DE69730834T2 | DE69738089D1 | DE69738089T2 | DE69739642D1 | DK1410797T3 | DK1767206T3 | DK914119…	WO1997049394A2 | ZA199705673A | AU199733402A | NO199806056A | CZ199804269A3 | EP914119A2 | SK199801784A3 | BR199709956A | CN1232394A | JP2000506540A | AU724998B | MX199900263A | NZ333385A | KR2000022111A | US6294197B1 | US6485745B1 | TW473394B | US20030035832A1 | RU2203054C2 | JP2003231634A | EP1410797A1 | CN1475207A | HU200203374A2 | NO317181B1 | EP914119B1 | NZ524346A | NO200401287A | DE6973083…	Solid oral dosage form of valsartan used to treat e.g. hypertension, heart failure, angina, myocardial infarction, arteriosclerosis or diabetic nephropathy	19960828GB199613470D0	2009-07-31 EEER EXAMINATION REQUEST +					78	81	CA2259148A,1997-06-18
	CA2673462C	SOLID ORAL DOSAGE FORMS OF VALSARTAN | FORMES POSOLOGIQUES SOLIDES DE VALSARTAN ADMINISTREES PAR VOIE ORALE	The invention is concerned with a tablet comprising: a) an active agent containing an effective amount of valsartan or a pharmaceutically acceptable salt thereof and an effective amount of hydrochlorothiazide (HCTZ); and b) pharmaceutically acceptable additives for preparation of tablets by compression methods; a process of forming the tablet and a coprimate, a granulate or a tablet produced by t…	1997-06-18	CA2673462A	GB199613470A | CA2259148A	1996-06-27 | 1997-06-18	2011-10-04	NOVARTIS AG,BASEL,CH	CA2673462C | AR59324A2 | AR8618A1 | AT276750T | AT371449T | AT446749T | AU199733402A | AU724998B2 | BR199709956A | CA2259148A1 | CA2259148C | CA2673462A1 | CN1133427C | CN1232394A | CN1475207A | CN1475207B | CN1951372A | CN1951372B | CO4870755A1 | CY2553B1 | CZ199804269A3 | CZ296850B6 | DE69730834D1 | DE69730834T2 | DE69738089D1 | DE69738089T2 | DE69739642D1 | DK1410797T3 | DK1767206T3 | DK914119…	WO1997049394A2 | ZA199705673A | AU199733402A | NO199806056A | CZ199804269A3 | EP914119A2 | SK199801784A3 | BR199709956A | CN1232394A | JP2000506540A | AU724998B | MX199900263A | NZ333385A | KR2000022111A | US6294197B1 | US6485745B1 | TW473394B | US20030035832A1 | RU2203054C2 | JP2003231634A | EP1410797A1 | CN1475207A | HU200203374A2 | NO317181B1 | EP914119B1 | NZ524346A | NO200401287A | DE6973083…	Solid oral dosage form of valsartan used to treat e.g. hypertension, heart failure, angina, myocardial infarction, arteriosclerosis or diabetic nephropathy	19960828GB199613470D0	2009-07-31 EEER EXAMINATION REQUEST +					78	81	, | CA2259148A,1997-06-18
	US5705658A	Azido containing tetrahydro furan compounds	δ-Amino-γ-hydroxy-ω-aryl-alkanoic acid amides of formula I ##STR1## and the salts thereof, have renin-inhibiting properties and can be used as antihypertensive medicinal active ingredients. delta -Amino- gamma -hydroxy- omega -aryl-alkanoic acid amides of formula I <IMAGE> (I) and the salts thereof, have renin-inhibiting properties and can be used as antihypertensive medicinal active ingredients.	1997-02-14	US1997800671A	CH19941169A | US1995416242A | US1996687277A	1994-04-18 | 1995-04-04 | 1996-07-25	1998-01-06	Novartis Corporation,Summit,NJ,US	US5705658A | AT183997T | AU199516420A | AU199516421A | AU199516423A | AU699616B | BR1100656A3 | CA2147044A1 | CA2147052A1 | CA2147056A1 | CA2147056C | CN1117960A | CN1153759C | CN1266118C | CN1550491A | CY2208B1 | CZ199500976A3 | CZ287935B6 | DE122007000071I1 | DE122007000071I2 | DE122009000020I1 | DE122011100052I1 | DE59506707D1 | DK678503T3 | EP678500A1 | EP678503A1 | EP678503B1 | EP678514A1 | …	EP678500A1 | AU199516421A | AU199516423A | NO199501441A | NO199501443A | ZA199503051A | ZA199503052A | CZ199500976A3 | FI199501771A | FI199501773A | ZA199503050A | CA2147044A1 | CA2147056A1 | JP8027079A | JP8081430A | US5559111A | NZ270938A | HU74074T | US5627182A | NZ270936A | US5646143A | US5654445A | HU71701T | US5659065A | BR1100656A3 | US5705658A | AU699616B | TW366341B | CZ287935B6 | TW4025…	New amino-alkanoic acid derivs. useful as intermediates for hydroxylated amino-alkanoic acid amide renin inhibitors	19950412FI951771A0	2009-06-03 FPAY FEE PAYMENT + | 2005-07-01 FPAY FEE PAYMENT + | 2001-06-29 FPAY FEE PAYMENT +					42	34	US1996687277A,1996-07-25 | US1995416242A,1995-04-04
	US5627182A	delta -amino- gamma -hydroxy- omega -aryl-alkanoic acid amides | &#948;-amino-&#947;-hydroxy-&#969;-aryl-alkanoic acid amides	δ-Amino-γ-hydroxy-ω-aryl-alkanoic acid amides of formula I ##STR1## and the salts thereof, have renin-inhibiting properties and can be used as antihypertensive medicinal active ingredients. delta -Amino- gamma -hydroxy- omega -aryl-alkanoic acid amides of formula I <IMAGE> (I) and the salts thereof, have renin-inhibiting properties and can be used as antihypertensive medicinal active ingredients.	1996-07-25	US1996687878A	CH19941169A | US1995416242A	1994-04-18 | 1995-04-04	1997-05-06	Ciba Geigy Corporation,Tarrytown,NY,US	US5627182A | AT183997T | AU199516420A | AU199516421A | AU199516423A | AU699616B | BR1100656A3 | CA2147044A1 | CA2147052A1 | CA2147056A1 | CA2147056C | CN1117960A | CN1153759C | CN1266118C | CN1550491A | CY2208B1 | CZ199500976A3 | CZ287935B6 | DE122007000071I1 | DE122007000071I2 | DE122009000020I1 | DE122011100052I1 | DE59506707D1 | DK678503T3 | EP678500A1 | EP678503A1 | EP678503B1 | EP678514A1 | …	EP678500A1 | AU199516421A | AU199516423A | NO199501441A | NO199501443A | ZA199503051A | ZA199503052A | CZ199500976A3 | FI199501771A | FI199501773A | ZA199503050A | CA2147044A1 | CA2147056A1 | JP8027079A | JP8081430A | US5559111A | NZ270938A | HU74074T | US5627182A | NZ270936A | US5646143A | US5654445A | HU71701T | US5659065A | BR1100656A3 | US5705658A | AU699616B | TW366341B | CZ287935B6 | TW4025…	New amino-alkanoic acid derivs. useful as intermediates for hydroxylated amino-alkanoic acid amide renin inhibitors	19950412FI951771A0	2008-09-30 FPAY FEE PAYMENT + | 2004-10-31 FPAY FEE PAYMENT + | 2000-10-31 FPAY FEE PAYMENT + | 2000-08-22 AS ASSIGNMENT NOVARTIS CORPORATION, NEW YORK CHANGE OF NAME;ASSIGNOR:CIBA-GEIGY CORPORATION;REEL/FRAME:011089/0648 1997-06-12	NOVARTIS CORPORATION,NEW YORK,NY,US NOVARTIS CORPORATION|608 FIFTH AVENUE NEW YORK NEW YORK 10020 NOVARTIS CORPORATION CIBA-GEIGY CORPORATION 1997-06-12 1997 011089/0648 2000-08-22 2000 CHANGE OF NAME (SEE DOCUMENT FOR DETAILS). NOVARTIS CORPORATION THOMAS HOXIE 564 MORRIS AVENUE SUMMIT, NJ 07901-1027				42	34	US1995416242A,1995-04-04
	US5646143A	delta -amino- gamma -hydroxy- omega -aryl-alkanoic acid amides | &#948;-amino-&#947;-hydroxy-&#969;-aryl-alkanoic acid amides	δ-Amino-γ-hydroxy-ω-aryl-alkanoic acid amides of formula I ##STR1## delta -Amino- gamma -hydroxy- omega -aryl-alkanoic acid amides of formula I <IMAGE> (I)	1996-07-25	US1996687277A	CH19941169A | US1995416242A	1994-04-18 | 1995-04-04	1997-07-08	Ciba Geigy Corporation,Tarrytown,NY,US	US5646143A | AT183997T | AU199516420A | AU199516421A | AU199516423A | AU699616B | BR1100656A3 | CA2147044A1 | CA2147052A1 | CA2147056A1 | CA2147056C | CN1117960A | CN1153759C | CN1266118C | CN1550491A | CY2208B1 | CZ199500976A3 | CZ287935B6 | DE122007000071I1 | DE122007000071I2 | DE122009000020I1 | DE122011100052I1 | DE59506707D1 | DK678503T3 | EP678500A1 | EP678503A1 | EP678503B1 | EP678514A1 | …	EP678500A1 | AU199516421A | AU199516423A | NO199501441A | NO199501443A | ZA199503051A | ZA199503052A | CZ199500976A3 | FI199501771A | FI199501773A | ZA199503050A | CA2147044A1 | CA2147056A1 | JP8027079A | JP8081430A | US5559111A | NZ270938A | HU74074T | US5627182A | NZ270936A | US5646143A | US5654445A | HU71701T | US5659065A | BR1100656A3 | US5705658A | AU699616B | TW366341B | CZ287935B6 | TW4025…	New amino-alkanoic acid derivs. useful as intermediates for hydroxylated amino-alkanoic acid amide renin inhibitors	19950412FI951771A0	2008-12-11 FPAY FEE PAYMENT + | 2006-01-03 CC CERTIFICATE OF CORRECTION | 2004-12-28 FPAY FEE PAYMENT + | 2000-12-28 FPAY FEE PAYMENT + | 2000-08-22 AS ASSIGNMENT NOVARTIS CORPORATION, NEW YORK CHANGE OF NAME;ASSIGNOR:CIBA-GEIGY CORPORATION;REEL/FRAME:011089/0648 1997-06-12	NOVARTIS CORPORATION,NEW YORK,NY,US NOVARTIS CORPORATION|608 FIFTH AVENUE NEW YORK NEW YORK 10020 NOVARTIS CORPORATION CIBA-GEIGY CORPORATION 1997-06-12 1997 011089/0648 2000-08-22 2000 CHANGE OF NAME (SEE DOCUMENT FOR DETAILS). NOVARTIS CORPORATION THOMAS HOXIE 564 MORRIS AVENUE SUMMIT, NJ 07901-1027	CC			42	34	US1995416242A,1995-04-04
	CA2220018A1	CRYSTALLINE [R-(R*,R*)]-2-(4-FLUOROPHENYL)-BETA,DELTA-DIHYDROXY-5-(1-METHYLETHYL)-3-PHENYL-4-[(PHENYLAMINO)CARBONYL]-1H-PYRROLE-1-HEPTANOIC ACID HEMI CALCIUM SALT (ATORVASTATIN) | FORMES CRISTALLINES D'HEMI-SEL DE CALCIUM D'ACIDE [R-(R*,R*)]-2-(4-FLUOROPHENYL)-BETA,DELTA-DIHYDROXY-5-(1-METHYLETHYL)-3-PHENYL-4-[(PHENYLAMINO)CARBONYL]-1H-PYRROLE-1-HEPTANOIQUE(ATORVASTATINE)	Novel crystalline forms of [R-(R*,R*)]-2-(4-fluorophenyl)-.beta.,.delta.- dihydroxy-5-(1-methylethyl)-3-phenyl-4-[(phenylamino)carbonyl]-1H-pyrr ole-1- heptanoic acid hemi calcium salt designated Form I, Form II, and Form IV are characterized by their X-ray powder diffraction and/or solid state NMR are described, as well as methods for the preparation and pharmaceutical composition of the same, w…	1996-07-08	CA2220018A	US19951452P | WO1996US11368A	1995-07-17 | 1996-07-08	1997-02-06	WARNER LAMBERT CO	CA2220018A1 | AR3458A1 | AR3459A1 | AT208375T | AT284868T | AT8453U1 | AU199664842A | AU725424B2 | BG102187A | BG63630B1 | BR199609872A | CA2220018C | CN1087288C | CN1190955A | CO4700443A1 | CY2358B1 | CZ199800121A3 | CZ294108B6 | CZ294695B6 | CZ294740B6 | DE69616808D1 | DE69616808T2 | DE69634054D1 | DE69634054T2 | DK1148049T3 | DK848705T3 | EA474B1 | EE199800015A | EE3606B1 | EP1148049A1 | EP114…			19970203ZA199606044A_	2000-03-13 EEER EXAMINATION REQUEST +
	CA2220018C	CRYSTALLINE [R-(R*,R*)]-2-(4-FLUOROPHENYL)-BETA,DELTA-DIHYDROXY-5-(1-METHYLETHYL)-3-PHENYL-4-[(PHENYLAMINO)CARBONYL]-1H-PYRROLE-1-HEPTANOIC ACID HEMI CALCIUM SALT (ATORVASTATIN) | FORMES CRISTALLINES D'HEMI-SEL DE CALCIUM D'ACIDE [R-(R*,R*)]-2-(4-FLUOROPHENYL)-BETA,DELTA-DIHYDROXY-5-(1-METHYLETHYL)-3-PHENYL-4-[(PHENYLAMINO)CARBONYL]-1H-PYRROLE-1-HEPTANOIQUE(ATORVASTATINE)	Novel crystalline forms of [R-(R*,R*)]-2-(4-fluorophenyl)-.beta.,.delta.dihydroxy-5-(1-methylethyl)-3-phenyl-4-[(phenylamino)carbonyl]-1H-pyrrole-1heptanoic acid hemi calcium salt designated Form I, Form II, and Form IV are characterized by their X-ray powder diffraction and/or solid state NMR are described, as well as methods for the preparation and pharmaceutical composition of the same, which …	1996-07-08	CA2220018A	US19951452P | WO1996US11368A	1995-07-17 | 1996-07-08	2001-04-17	WARNER-LAMBERT COMPANY,MORRIS PLAINS,NJ,US	CA2220018C | AR3458A1 | AR3459A1 | AT208375T | AT284868T | AT8453U1 | AU199664842A | AU725424B2 | BG102187A | BG63630B1 | BR199609872A | CA2220018A1 | CN1087288C | CN1190955A | CO4700443A1 | CY2358B1 | CZ199800121A3 | CZ294108B6 | CZ294695B6 | CZ294740B6 | DE69616808D1 | DE69616808T2 | DE69634054D1 | DE69634054T2 | DK1148049T3 | DK848705T3 | EA474B1 | EE199800015A | EE3606B1 | EP1148049A1 | EP114…	WO1997003959A1 | AU199664842A | ZA199606044A | NO199800207A | EP848705A1 | CZ199800121A3 | SK199800062A3 | BR199609872A | IL122118A | HU199900678A2 | JP11509230A | US5969156A | MX199709099A | KR1999029043A | AU725424B | NZ312907A | NZ507836A | CA2220018C | NO309898B1 | EP848705B1 | EP1148049A1 | DE69616808D1 | ES2167587T3 | JP03296564B2 | CN1190955A | TW486467B | JP2003073353A | MX214428B | KR389…	New crystalline forms of atorvastatin (hypolipidaemic agent) has good filtering and drying properties, and better purity and stability than amorphous form	19970203ZA199606044A_	2000-03-13 EEER EXAMINATION REQUEST +					53	47	, | CA2220018A,1996-07-08
	US5654445A	delta -amino- gamma -hydroxy- omega -aryl-alkanoic acids | &#948;-amino-&#947;-hydroxy-&#969;-aryl-alkanoic acids	δ-Amino-γ-hydroxy-ω-aryl-alkanoic acid amides of formula I ##STR1## and the salts thereof, have renin-inhibiting properties and can be used as antihypertensive medicinal active ingredients. delta -Amino- gamma -hydroxy- omega -aryl-alkanoic acid amides of formula I <IMAGE> (I) and the salts thereof, have renin-inhibiting properties and can be used as antihypertensive medicinal active ingredients.	1996-07-02	US1996674555A	CH19941169A | US1995416242A	1994-04-18 | 1995-04-04	1997-08-05	Ciba Geigy Corporation,Tarrytown,NY,US	US5654445A | AT183997T | AU199516420A | AU199516421A | AU199516423A | AU699616B | BR1100656A3 | CA2147044A1 | CA2147052A1 | CA2147056A1 | CA2147056C | CN1117960A | CN1153759C | CN1266118C | CN1550491A | CY2208B1 | CZ199500976A3 | CZ287935B6 | DE122007000071I1 | DE122007000071I2 | DE122009000020I1 | DE122011100052I1 | DE59506707D1 | DK678503T3 | EP678500A1 | EP678503A1 | EP678503B1 | EP678514A1 | …	EP678500A1 | AU199516421A | AU199516423A | NO199501441A | NO199501443A | ZA199503051A | ZA199503052A | CZ199500976A3 | FI199501771A | FI199501773A | ZA199503050A | CA2147044A1 | CA2147056A1 | JP8027079A | JP8081430A | US5559111A | NZ270938A | HU74074T | US5627182A | NZ270936A | US5646143A | US5654445A | HU71701T | US5659065A | BR1100656A3 | US5705658A | AU699616B | TW366341B | CZ287935B6 | TW4025…	New amino-alkanoic acid derivs. useful as intermediates for hydroxylated amino-alkanoic acid amide renin inhibitors	19950412FI951771A0	2009-01-07 FPAY FEE PAYMENT + | 2005-02-02 FPAY FEE PAYMENT + | 2001-01-31 FPAY FEE PAYMENT + | 2000-08-22 AS ASSIGNMENT NOVARTIS CORPORATION, NEW YORK CHANGE OF NAME;ASSIGNOR:CIBA-GEIGY CORPORATION;REEL/FRAME:011089/0648 1997-06-12	NOVARTIS CORPORATION,NEW YORK,NY,US NOVARTIS CORPORATION|608 FIFTH AVENUE NEW YORK NEW YORK 10020 NOVARTIS CORPORATION CIBA-GEIGY CORPORATION 1997-06-12 1997 011089/0648 2000-08-22 2000 CHANGE OF NAME (SEE DOCUMENT FOR DETAILS). NOVARTIS CORPORATION THOMAS HOXIE 564 MORRIS AVENUE SUMMIT, NJ 07901-1027				42	34	US1995416242A,1995-04-04
	US6080761A	Inhibition of smooth muscle cell migration by (R)-amlodipine	The R(+) isomer of amlodipine is a potent inhibitor of smooth muscle cell migration despite its lack of calcium channel-blocking activity. It is useful for treating atherosclerosis, re-stenosis after angioplasty and endometriosis. PCT No. PCT/EP94/02697 Sec. 371 Date Feb. 21, 1996 Sec. 102(e) Date Feb. 21, 1996 PCT Filed Aug. 10, 1994 PCT Pub. No. WO95/05822 PCT Pub. Date Mar. 2, 1995The R(+) iso…	1996-02-21	US1996596365A	GB199317773A | WO1994EP2697A	1993-08-26 | 1994-08-10	2000-06-27	Pfizer Inc.,New York,NY,US	US6080761A | AT192337T | AU199476129A | AU686658B | CA2170278A1 | CA2170278C | CN1060039C | CN1129907A | DE69424317D1 | DE69424317T2 | DK754043T3 | EP754043A1 | EP754043B1 | ES2145149T3 | GB199317773D0 | GR3033547T3 | IL110700A | IL110700D0 | JP03007992B2 | JP2000044475A | JP8509004A | KR163840B1 | NO199600730A | NO199600730D0 | NO308826B1 | NZ271993A | PT754043E | TW470646B | WO1995005822A1 | ZA…	WO1995005822A1 | AU199476129A | NO199600730A | ZA199406475A | JP8509004A | EP754043A1 | CN1129907A | NZ271993A | AU686658B | IL110700A | CA2170278C | JP03007992B2 | JP2000044475A | EP754043B1 | KR163840B1 | DE69424317D1 | ES2145149T3 | US6080761A | NO308826B1 | TW470646B | MX205560B | CN1060039C	New use for optically active amlopidine to treat atherosclerosis, re-stenosis after angioplasty and endometriosis without any concomitant cardiovascular effects.	19931013GB199317773D0	2012-08-14 FP EXPIRED DUE TO FAILURE TO PAY MAINTENANCE FEE - 2012-06-27 | 2012-06-27 LAPS LAPSE FOR FAILURE TO PAY MAINTENANCE FEES - | 2012-02-06 REMI MAINTENANCE FEE REMINDER MAILED | 2007-09-14 FPAY FEE PAYMENT + | 2003-09-26 FPAY FEE PAYMENT + | 2000-03-14 AS ASSIGNMENT PFIZER INC., NEW YORK CONSENT;ASSIGNOR:PFIZER LIMITED;REEL/FRAME:010694/0578 2000-02-28 | 1996-02-21 AS ASSIGNMENT PFIZER I…	PFIZER INC.,NEW YORK,NY,US PFIZER INC.|BLDG. 235, 20TH FLOOR 235 EAST 42ND STREET, 20TH FLOOR NEW YORK NEW YORK 10017 PFIZER INC. PFIZER LIMITED 2000-02-28 2000 010694/0578 2000-03-14 2000 CONSENT PFIZER INC. GREGG C. BENSON EASTERN POINT ROAD, BOX 519 GROTON, CONNECTICUT 06340 | PFIZER INC.,NEW YORK,NY,US PFIZER INC.|BLDG. 235, 20TH FLOOR 235 EAST 42ND STREET NEW YORK NEW YORK 10017 PFIZER INC. …	E3			22	30
	US5646171A	Angiotensin II antagonist 1-biphenylmethylimidazole compounds and their therapeutic use	An angiotensin II antagonist of the formula: ##STR1## in which: R.sub. p.sup.1 represents hydrogen, C.sub.1-C.sub.6 alkyl, C.sub. 3-C.sub.6 cycloalkyl or C.sub.1-C.sub.6 alkanoyl; R.sub.p.sup.2 represents a single bond, C.sub.1-C.sub.4 alkylene or C.sub.1-C.sub.4 alkylidene; R. sub.p.sup.3 and R.sub.p.sup.4 are independently selected from the group consisting of hydrogen and C.sub.1-C.sub.6 alkyl…	1995-06-05	US1995465369A	JP199127098A | JP199196588A | JP1991134889A | JP1991167138A | JP1991173972A | JP1991184841A | US1992839482A | JP1992141160A | US199369595A | US1995378650A	1991-02-21 | 1991-04-26 | 1991-06-06 | 1991-07-08 | 1991-07-15 | 1991-07-24 | 1992-02-20 | 1992-06-02 | 1993-06-01 | 1995-01-26	1997-07-08	Sankyo Company Limited,Tokyo,JP	US5646171A | AT199548T | AT200777T | AT200778T | AU199211125A | AU199339880A | AU647887B | AU661153B | BR1100452A3 | CA2061607A1 | CA2061607C | CA2097444A1 | CA2097444C | CA2229000A1 | CA2229000C | CN1045770C | CN1051766C | CN1065063A | CN1085896A | CN1101384C | CN1121859C | CN1188645A | CN1189490A | CZ199200516A3 | CZ199301050A3 | CZ287764B6 | CZ289194B6 | CZ289244B6 | DE10299043I1 | DE10299043I…	EP573218A2 | AU199339880A | CZ199301050A3 | HU64329T | NO199301980A | CA2097444A1 | FI199302492A | JP6049036A | ZA199303824A | TW228521B | EP573218A3 | NZ247750A | CN1085896A | AU661153B | US5616599A | US5646171A | IL105825A | RU2086541C1 | NO303872B1 | MX193466B | CZ287764B6 | EP573218B1 | DE69329982D1 | ES2155827T3 | KR300473B | JP03461863B2 | FI112476B1 | PH1199346284B1 | CN1051766C | CA209744…	New 1-(bi:phenyl-methyl)imidazole-5-carboxylic acid derivs. useful as angiotensin II antagonists in the treatment and prophylaxis of hyper-tension and cardiovascular diseases	19920220FI199200749A0	2008-07-17 FPAY FEE PAYMENT + | 2007-06-07 AS ASSIGNMENT DAIICHI SANKYO COMPANY, LIMITED, JAPAN MERGER;ASSIGNOR:SANKYO COMPANY, LIMITED;REEL/FRAME:019390/0700 2007-04-01 | 2004-08-12 FPAY FEE PAYMENT + | 2000-07-17 FPAY FEE PAYMENT + | 1999-07-20 CC CERTIFICATE OF CORRECTION	DAIICHI SANKYO COMPANY LIMITED,TOKYO,JP DAIICHI SANKYO COMPANY LIMITED|3-5-1, NIHONBASHI HONCHO, CHUO-KU TOKYO JAPAN DAIICHI SANKYO COMPANY, LIMITED SANKYO COMPANY, LIMITED 2007-04-01 2007 019390/0700 2007-06-07 2007 MERGER (SEE DOCUMENT FOR DETAILS). FRISHAUF, HOLTZ, GOODMAN & CHICK, PC 220 FIFTH AVENUE 16TH FLOOR NEW YORK, NY 10001-7708	CC			30	34	US199369595A,1993-06-01 | US1992839482A,1992-02-20 | US1995378650A,1995-01-26
	CA2147044A1	ALPHA-AMINOALKANOIC ACIDS AND REDUCTION PRODUCTS | ACIDES ALPHA-AMINOALCANOIQUES ET PRODUITS DE REDUCTION	Compounds of formula I (I), wherein R1 is an aliphatic, cycloaliphatic, cycloaliphatic-aliphatic, aromatic or heteroaromatic radical, a hydroxy group that is aliphatically, araliphatically or heteroarylaliphatically etherified or protected by a hydroxy-protecting group, or an aliphatically etherified mercapto group, and R2 is an aliphatic, cycloaliphatic, cycloaliphatic-aliphatic, araliphatic or …	1995-04-13	CA2147044A	CH19941169A | CH1995247A	1994-04-18 | 1995-01-30	1995-10-19	NOVARTIS AG,BASEL,CH	CA2147044A1 | AT183997T | AU199516420A | AU199516421A | AU199516423A | AU699616B | BR1100656A3 | CA2147052A1 | CA2147056A1 | CA2147056C | CN1117960A | CN1153759C | CN1266118C | CN1550491A | CY2208B1 | CZ199500976A3 | CZ287935B6 | DE122007000071I1 | DE122007000071I2 | DE122009000020I1 | DE122011100052I1 | DE59506707D1 | DK678503T3 | EP678500A1 | EP678503A1 | EP678503B1 | EP678514A1 | ES2137478T3 |…	EP678500A1 | AU199516421A | AU199516423A | NO199501441A | NO199501443A | ZA199503051A | ZA199503052A | CZ199500976A3 | FI199501771A | FI199501773A | ZA199503050A | CA2147044A1 | CA2147056A1 | JP8027079A | JP8081430A | US5559111A | NZ270938A | HU74074T | US5627182A | NZ270936A | US5646143A | US5654445A | HU71701T | US5659065A | BR1100656A3 | US5705658A | AU699616B | TW366341B | CZ287935B6 | TW4025…	New amino-alkanoic acid derivs. useful as intermediates for hydroxylated amino-alkanoic acid amide renin inhibitors	19950412FI951771A0	1999-04-13 FZDE DEAD -					42	34
	CA2147052A1	3,5-DISUBSTITUTED TETRAHYDROFURAN-2-ONES | DERIVES DE DISUBSTITUTION EN 3,5 DE TETRAHYDROFURAN-2-ONES	Compounds of formula I (I),whereinR1 is free or esterified carboxy, hydroxymethyl or formyl,R2 and R4 are each independently of the other aliphatic, cycloaliphatic-aliphatic, araliphaticor heteroarylaliphatic radicals andR3 is azido, or amino that is aliphatically or araliphatically substituted and/or protected by anamino-protecting group,and the salts thereof, are valuable intermediates in the p…	1995-04-13	CA2147052A	CH19941169A | CH1995246A	1994-04-18 | 1995-01-30	1995-10-19	NOVARTIS AG,BASEL,CH	CA2147052A1 | AT183997T | AU199516420A | AU199516421A | AU199516423A | AU699616B | BR1100656A3 | CA2147044A1 | CA2147056A1 | CA2147056C | CN1117960A | CN1153759C | CN1266118C | CN1550491A | CY2208B1 | CZ199500976A3 | CZ287935B6 | DE122007000071I1 | DE122007000071I2 | DE122009000020I1 | DE122011100052I1 | DE59506707D1 | DK678503T3 | EP678500A1 | EP678503A1 | EP678503B1 | EP678514A1 | ES2137478T3 |…	EP678514A1 | AU199516420A | NO199501442A | FI199501772A | CA2147052A1 | JP8053434A | NZ270939A | US5606078A | HU72110T	New 3,5-di:substd. tetra:hydro-furan-2-one derivs. useful as intermediates for aryl-substd. hydroxylated amino-alkanoic acid amide renin inhibitors	19950412FI951771A0	1999-04-13 FZDE DEAD -					9	24
	CA2147056A1	NOVEL DELTA-AMINO-GAMMA-HYDROXY-OMEGA-ARYL-ALKANOIC ACID AMIDES | AMIDES D'ACIDE DELTA-AMINO-GAMMA-HYDROXY-OMEGA-ARYLALCANOIQUE	.delta.Amino-.gamma.-hydroxy-.omega.-aryl-alkanoic acid amides of formula I <IMG> (I), wherein R1 is hydrogen, hydroxy, lower alkoxy, cycloalkoxy, lower alkoxy-lower alkoxy or free or esterified or amidated carboxy-lower alkoxy, R2 is hydrogen, lower alkyl, cycloalkyl, lower alkoxy-lower alkyl, lower alkoxy-lower alkoxy-lower alkyl, cyclo-alkoxy-lower alkyl, hydroxy, optionally lower alkanoylated…	1995-04-13	CA2147056A	CH19941169A	1994-04-18	1995-10-19	CIBA GEIGY AG	CA2147056A1 | AT183997T | AU199516420A | AU199516421A | AU199516423A | AU699616B | BR1100656A3 | CA2147044A1 | CA2147052A1 | CA2147056C | CN1117960A | CN1153759C | CN1266118C | CN1550491A | CY2208B1 | CZ199500976A3 | CZ287935B6 | DE122007000071I1 | DE122007000071I2 | DE122009000020I1 | DE122011100052I1 | DE59506707D1 | DK678503T3 | EP678500A1 | EP678503A1 | EP678503B1 | EP678514A1 | ES2137478T3 |…	EP678500A1 | AU199516421A | AU199516423A | NO199501441A | NO199501443A | ZA199503051A | ZA199503052A | CZ199500976A3 | FI199501771A | FI199501773A | ZA199503050A | CA2147044A1 | CA2147056A1 | JP8027079A | JP8081430A | US5559111A | NZ270938A | HU74074T | US5627182A | NZ270936A | US5646143A | US5654445A | HU71701T | US5659065A | BR1100656A3 | US5705658A | AU699616B | TW366341B | CZ287935B6 | TW4025…	New amino-alkanoic acid derivs. useful as intermediates for hydroxylated amino-alkanoic acid amide renin inhibitors	19950412FI951771A0	2001-12-10 EEER EXAMINATION REQUEST +					42	34
	CA2147056C	NOVEL DELTA-AMINO-GAMMA-HYDROXY-OMEGA-ARYL-ALKANOIC ACID AMIDES | AMIDES D'ACIDE DELTA-AMINO-GAMMA-HYDROXY-OMEGA-ARYLALCANOIQUE	.delta.-Amino-.gamma.-hydroxy-.omega.-aryl-alkanoic acid amides of formula I(see formula I)wherein R1 is hydrogen, hydroxy, lower alkoxy, cycloalkoxy, lower alkoxy-lower alkoxyor free or esterified or amidated carboxy-lower alkoxy, R2 is hydrogen, lower alkyl,cycloalkyl, lower alkoxy-lower alkyl, lower alkoxy-lower alkoxy-lower alkyl, cycloalkoxy-lower alkyl, hydroxy, optionally lower alkanoylate…	1995-04-13	CA2147056A	CH19941169A	1994-04-18	2005-10-25	NOVARTIS AG,BASEL,CH	CA2147056C | AT183997T | AU199516420A | AU199516421A | AU199516423A | AU699616B | BR1100656A3 | CA2147044A1 | CA2147052A1 | CA2147056A1 | CN1117960A | CN1153759C | CN1266118C | CN1550491A | CY2208B1 | CZ199500976A3 | CZ287935B6 | DE122007000071I1 | DE122007000071I2 | DE122009000020I1 | DE122011100052I1 | DE59506707D1 | DK678503T3 | EP678500A1 | EP678503A1 | EP678503B1 | EP678514A1 | ES2137478T3 |…	EP678500A1 | AU199516421A | AU199516423A | NO199501441A | NO199501443A | ZA199503051A | ZA199503052A | CZ199500976A3 | FI199501771A | FI199501773A | ZA199503050A | CA2147044A1 | CA2147056A1 | JP8027079A | JP8081430A | US5559111A | NZ270938A | HU74074T | US5627182A | NZ270936A | US5646143A | US5654445A | HU71701T | US5659065A | BR1100656A3 | US5705658A | AU699616B | TW366341B | CZ287935B6 | TW4025…	New amino-alkanoic acid derivs. useful as intermediates for hydroxylated amino-alkanoic acid amide renin inhibitors	19950412FI951771A0	2001-12-10 EEER EXAMINATION REQUEST +					42	34	,
	US5559111A	delta -amino- gamma -hydroxy- omega -aryl-alkanoic acid amides | &#948;-amino-&#947;-hydroxy-&#969;-aryl-alkanoic acid amides	δ-Amino-γ-hydroxy-ω-aryl-alkanoic acid amides of formula I ##STR1## and the salts thereof, have renin-inhibiting properties and can be used as antihypertensive medicinal active ingredients. delta -Amino- gamma -hydroxy- omega -aryl-alkanoic acid amides of formula I <IMAGE> (I) and the salts thereof, have renin-inhibiting properties and can be used as antihypertensive medicinal active ingredients.	1995-04-04	US1995416242A	CH19941169A	1994-04-18	1996-09-24	Ciba Geigy Corporation,Tarrytown,NY,US	US5559111A | AT183997T | AU199516420A | AU199516421A | AU199516423A | AU699616B | BR1100656A3 | CA2147044A1 | CA2147052A1 | CA2147056A1 | CA2147056C | CN1117960A | CN1153759C | CN1266118C | CN1550491A | CY2208B1 | CZ199500976A3 | CZ287935B6 | DE122007000071I1 | DE122007000071I2 | DE122009000020I1 | DE122011100052I1 | DE59506707D1 | DK678503T3 | EP678500A1 | EP678503A1 | EP678503B1 | EP678514A1 | …	EP678500A1 | AU199516421A | AU199516423A | NO199501441A | NO199501443A | ZA199503051A | ZA199503052A | CZ199500976A3 | FI199501771A | FI199501773A | ZA199503050A | CA2147044A1 | CA2147056A1 | JP8027079A | JP8081430A | US5559111A | NZ270938A | HU74074T | US5627182A | NZ270936A | US5646143A | US5654445A | HU71701T | US5659065A | BR1100656A3 | US5705658A | AU699616B | TW366341B | CZ287935B6 | TW4025…	New amino-alkanoic acid derivs. useful as intermediates for hydroxylated amino-alkanoic acid amide renin inhibitors	19950412FI951771A0	2011-02-17 356 PATENT TERM EXTENSION UNDER 35 U.S.C. 156 + PRODUCT NAME: TEKTURNA 2015-04-04 2018-07-21 | 2008-02-28 FPAY FEE PAYMENT + | 2004-03-02 FPAY FEE PAYMENT + | 2000-08-22 AS ASSIGNMENT NOVARTIS CORPORATION, NEW YORK CHANGE OF NAME;ASSIGNOR:CIBA-GEIGY CORPORATION;REEL/FRAME:011089/0648 1997-06-12 | 2000-03-01 FPAY FEE PAYMENT + | 1996-04-29 AS ASSIGNMENT CIBA-GEIGY CORPORATION, NEW YORK …	NOVARTIS CORPORATION,NEW YORK,NY,US NOVARTIS CORPORATION|608 FIFTH AVENUE NEW YORK NEW YORK 10020 NOVARTIS CORPORATION CIBA-GEIGY CORPORATION 1997-06-12 1997 011089/0648 2000-08-22 2000 CHANGE OF NAME (SEE DOCUMENT FOR DETAILS). NOVARTIS CORPORATION THOMAS HOXIE 564 MORRIS AVENUE SUMMIT, NJ 07901-1027 | CIBA-GEIGY CORPORATION,TARRYTOWN,NY,US CIBA-GEIGY CORPORATION|PATENT DEPARTMENT 520 WHITE PLAI…				42	34
	US5606078A	3,5-Disubstituted tetrahydrofuran-2-ones	Compounds of formula I ##STR1## wherein R.sub.1 is free or esterified carboxy, hydroxymethyl or formyl,<P><P>R.sub.2 and R.sub.4 are each independently of the other aliphatic, cycloaliphatic-aliphatic, araliphatic or heteroarylaliphatic radicals and<P>< P>R.sub.3 is azido, or amino that is aliphatically or araliphatically substituted and/or protected by an amino-protecting group,<P>< P>and the sa…	1995-04-04	US1995416237A	CH19941169A | CH1995246A	1994-04-18 | 1995-01-30	1997-02-25	Ciba Geigy Corporation,Tarrytown,NY,US	US5606078A | AT183997T | AU199516420A | AU199516421A | AU199516423A | AU699616B | BR1100656A3 | CA2147044A1 | CA2147052A1 | CA2147056A1 | CA2147056C | CN1117960A | CN1153759C | CN1266118C | CN1550491A | CY2208B1 | CZ199500976A3 | CZ287935B6 | DE122007000071I1 | DE122007000071I2 | DE122009000020I1 | DE122011100052I1 | DE59506707D1 | DK678503T3 | EP678500A1 | EP678503A1 | EP678503B1 | EP678514A1 | …	EP678514A1 | AU199516420A | NO199501442A | FI199501772A | CA2147052A1 | JP8053434A | NZ270939A | US5606078A | HU72110T	New 3,5-di:substd. tetra:hydro-furan-2-one derivs. useful as intermediates for aryl-substd. hydroxylated amino-alkanoic acid amide renin inhibitors	19950412FI951771A0	2001-05-01 FP EXPIRED DUE TO FAILURE TO PAY MAINTENANCE FEE - 2001-02-25 | 2001-02-25 LAPS LAPSE FOR FAILURE TO PAY MAINTENANCE FEES - | 2000-09-19 REMI MAINTENANCE FEE REMINDER MAILED | 1996-04-04 AS ASSIGNMENT CIBA-GEIGY CORPORATION, NEW YORK ASSIGNMENT OF ASSIGNORS INTEREST;ASSIGNORS:GOSCHKE, RICHARD;HEROLD, PETER;RIGOLLIER, PASCAL;AND OTHERS;REEL/FRAME:007879/0439 1995-02-28	CIBA-GEIGY CORPORATION,TARRYTOWN,NY,US CIBA-GEIGY CORPORATION|PATENT DEPARTMENT 520 WHITE PLAINS ROAD, P.O. BOX 2005 TARRYTOWN NEW YORK 10591 CIBA-GEIGY CORPORATION GOSCHKE, RICHARD 1995-02-28 1995 HEROLD, PETER 1995-02-28 1995 RIGOLLIER, PASCAL 1995-02-28 1995 MAIBAUM, JURGEN KLAUS 1995-02-28 1995 007879/0439 1996-04-04 1996 ASSIGNMENT OF ASSIGNORS INTEREST (SEE DOCUMENT FOR DETAILS). CIBA-GEIGY…	E1			9	24
	US5659065A	Alpha-aminoalkanoic acids and reduction products	Compounds of formula I ##STR1## wherein R.sub.1 is an aliphatic, cycloaliphatic, cycloaliphatic-aliphatic, aromatic or heteroaromatic radical, a hydroxy group that is aliphatically, araliphatically or heteroarylaliphatically etherified or protected by a hydroxy-protecting group, or an aliphatically etherified mercapto group, and<P>< P>R.sub.2 is an aliphatic, cycloaliphatic, cycloaliphatic-alipha…	1995-04-04	US1995416240A	CH19941169A | CH1995247A	1994-04-18 | 1995-01-30	1997-08-19	Novartis Corporation,Tarrytown,NY,US	US5659065A | AT183997T | AU199516420A | AU199516421A | AU199516423A | AU699616B | BR1100656A3 | CA2147044A1 | CA2147052A1 | CA2147056A1 | CA2147056C | CN1117960A | CN1153759C | CN1266118C | CN1550491A | CY2208B1 | CZ199500976A3 | CZ287935B6 | DE122007000071I1 | DE122007000071I2 | DE122009000020I1 | DE122011100052I1 | DE59506707D1 | DK678503T3 | EP678500A1 | EP678503A1 | EP678503B1 | EP678514A1 | …	EP678500A1 | AU199516421A | AU199516423A | NO199501441A | NO199501443A | ZA199503051A | ZA199503052A | CZ199500976A3 | FI199501771A | FI199501773A | ZA199503050A | CA2147044A1 | CA2147056A1 | JP8027079A | JP8081430A | US5559111A | NZ270938A | HU74074T | US5627182A | NZ270936A | US5646143A | US5654445A | HU71701T | US5659065A | BR1100656A3 | US5705658A | AU699616B | TW366341B | CZ287935B6 | TW4025…	New amino-alkanoic acid derivs. useful as intermediates for hydroxylated amino-alkanoic acid amide renin inhibitors	19950412FI951771A0	2001-10-23 FP EXPIRED DUE TO FAILURE TO PAY MAINTENANCE FEE - 2001-08-19 | 2001-08-19 LAPS LAPSE FOR FAILURE TO PAY MAINTENANCE FEES - | 2001-03-13 REMI MAINTENANCE FEE REMINDER MAILED		E1			42	34
	US5616599A	Angiotensin II antagonist 1-biphenylmethylimidazole compounds and their therapeutic use | Angiotensin II antagosist 1-biphenylmethylimidazole compounds and their therapeutic use	Compounds of the following formula (I) or the formula (I).sub. p : ##STR1## wherein R.sup.1 is alkyl or alkenyl; R.sup.2 and R.sup.3 are hydrogen, alkyl, alkenyl, cycloalkyl, aralkyl, aryl, or aryl fused to cycloalkyl; R.sup.4 is hydrogen, alkyl, alkanoyl, alkenoyl, arylcarbonyl, alkoxycarbonyl, tetrahydropyranyl, tetrahydrothiopyranyl, tetrahydrothienyl, tetrahydrofuryl, a group of formula--SiR.…	1995-01-26	US1995378650A	JP199127098A | JP199196588A | JP1991134889A | JP1991167138A | JP1991173972A | JP1991184841A | US1992839482A | JP1992141160A | US199369595A	1991-02-21 | 1991-04-26 | 1991-06-06 | 1991-07-08 | 1991-07-15 | 1991-07-24 | 1992-02-20 | 1992-06-02 | 1993-06-01	1997-04-01	Sankyo Company Limited,Tokyo,JP	US5616599A | AT199548T | AT200777T | AT200778T | AU199211125A | AU199339880A | AU647887B | AU661153B | BR1100452A3 | CA2061607A1 | CA2061607C | CA2097444A1 | CA2097444C | CA2229000A1 | CA2229000C | CN1045770C | CN1051766C | CN1065063A | CN1085896A | CN1101384C | CN1121859C | CN1188645A | CN1189490A | CZ199200516A3 | CZ199301050A3 | CZ287764B6 | CZ289194B6 | CZ289244B6 | DE10299043I1 | DE10299043I…	EP573218A2 | AU199339880A | CZ199301050A3 | HU64329T | NO199301980A | CA2097444A1 | FI199302492A | JP6049036A | ZA199303824A | TW228521B | EP573218A3 | NZ247750A | CN1085896A | AU661153B | US5616599A | US5646171A | IL105825A | RU2086541C1 | NO303872B1 | MX193466B | CZ287764B6 | EP573218B1 | DE69329982D1 | ES2155827T3 | KR300473B | JP03461863B2 | FI112476B1 | PH1199346284B1 | CN1051766C | CA209744…	New 1-(bi:phenyl-methyl)imidazole-5-carboxylic acid derivs. useful as angiotensin II antagonists in the treatment and prophylaxis of hyper-tension and cardiovascular diseases	19920220FI199200749A0	2008-05-14 356 PATENT TERM EXTENSION UNDER 35 U.S.C. 156 + PRODUCT NAME: BENICAR 2014-04-01 2016-04-25 | 2008-04-03 FPAY FEE PAYMENT + | 2007-06-07 AS ASSIGNMENT DAIICHI SANKYO COMPANY, LIMITED, JAPAN MERGER;ASSIGNOR:SANKYO COMPANY, LIMITED;REEL/FRAME:019390/0700 2007-04-01 | 2005-05-03 CC CERTIFICATE OF CORRECTION | 2004-04-28 FPAY FEE PAYMENT + | 2002-10-15 CC CERTIFICATE OF CORRECTION | 2000-0…	DAIICHI SANKYO COMPANY LIMITED,TOKYO,JP DAIICHI SANKYO COMPANY LIMITED|3-5-1, NIHONBASHI HONCHO, CHUO-KU TOKYO JAPAN DAIICHI SANKYO COMPANY, LIMITED SANKYO COMPANY, LIMITED 2007-04-01 2007 019390/0700 2007-06-07 2007 MERGER (SEE DOCUMENT FOR DETAILS). FRISHAUF, HOLTZ, GOODMAN & CHICK, PC 220 FIFTH AVENUE 16TH FLOOR NEW YORK, NY 10001-7708 | SANKYO COMPANY LIMITED,CHUO-KU, TOKYO, JAPAN,JP SANKYO C…	CC			30	34	US1992839482A,1992-02-20 | US199369595A,1993-06-01
	CA2170278A1	Inhibition of Smooth Muscle Cell Migration by (R)-Amlodipine		1994-08-10	CA2170278A	GB199317773A | WO1994EP2697A	1993-08-26 | 1994-08-10	1995-03-02	PFIZER RES & DEV	CA2170278A1 | AT192337T | AU199476129A | AU686658B | CA2170278C | CN1060039C | CN1129907A | DE69424317D1 | DE69424317T2 | DK754043T3 | EP754043A1 | EP754043B1 | ES2145149T3 | GB199317773D0 | GR3033547T3 | IL110700A | IL110700D0 | JP03007992B2 | JP2000044475A | JP8509004A | KR163840B1 | NO199600730A | NO199600730D0 | NO308826B1 | NZ271993A | PT754043E | TW470646B | US6080761A | WO1995005822A1 | ZA…			19931013GB199317773D0	2013-09-23 MKLA LAPSED - 2013-08-12 | 1996-02-23 EEER EXAMINATION REQUEST +
	CA2170278C	INHIBITION OF SMOOTH MUSCLE CELL MIGRATION BY (R)-AMLODIPINE | INHIBITION DE LA MIGRATION DES CELLULES DE MUSCLE LISSE PAR LA (R)-AMLODIPINE	The R(+) isomer of amlodipine is a potent inhibitor of smooth muscle cell migration despite its lack of calcium channel-blocking activity. It is useful for treating atherosclerosis, re-stenosis after angioplasty and endometriosis. L'isomère R(+) de l'amlodipine est un puissant inhibiteur de la migration cellulaire de la fibre lisse malgré son manque d'activité de blocage de canal calcique. Cet is…	1994-08-10	CA2170278A	GB199317773A | WO1994EP2697A	1993-08-26 | 1994-08-10	1999-08-03	PFIZER IRELAND PHARMACEUTICALS,COUNTY DUBLIN,IE	CA2170278C | AT192337T | AU199476129A | AU686658B | CA2170278A1 | CN1060039C | CN1129907A | DE69424317D1 | DE69424317T2 | DK754043T3 | EP754043A1 | EP754043B1 | ES2145149T3 | GB199317773D0 | GR3033547T3 | IL110700A | IL110700D0 | JP03007992B2 | JP2000044475A | JP8509004A | KR163840B1 | NO199600730A | NO199600730D0 | NO308826B1 | NZ271993A | PT754043E | TW470646B | US6080761A | WO1995005822A1 | ZA…	WO1995005822A1 | AU199476129A | NO199600730A | ZA199406475A | JP8509004A | EP754043A1 | CN1129907A | NZ271993A | AU686658B | IL110700A | CA2170278C | JP03007992B2 | JP2000044475A | EP754043B1 | KR163840B1 | DE69424317D1 | ES2145149T3 | US6080761A | NO308826B1 | TW470646B | MX205560B | CN1060039C	New use for optically active amlopidine to treat atherosclerosis, re-stenosis after angioplasty and endometriosis without any concomitant cardiovascular effects.	19931013GB199317773D0	2013-09-23 MKLA LAPSED - 2013-08-12 | 1996-02-23 EEER EXAMINATION REQUEST +					22	30	, | CA2170278A,1994-08-10
	US5686104A	Stable oral CI-981 formulation and process of preparing same	An oral pharmaceutical composition is provided for treating hypercholestereolemia or hyperlipidemia containing an advantageous formulation for stabilizing the HMG-CoA coenzyme A inhibitor, CI-981 Hemi-Calcium, of formula (IA) ##STR1## with effective amounts of calcium carbonate. A method for preparing a CI-981 stabilizing composition is described. An oral pharmaceutical composition is provided fo…	1994-05-20	US1994246919A	US19935708A	1993-01-19	1997-11-11	Warner Lambert Company,Morris Plains,NJ,US	US5686104A | AT178794T | CA2150372A1 | CA2150372C | CY2128B1 | DE69324504D1 | DE69324504T2 | DK680320T3 | EP680320A1 | EP680320B1 | ES2133158T3 | GR3030359T3 | JP03254219B2 | JP8505640A | MX199400281A | SG45369A1 | US6126971A | WO1994016693A1	WO1994016693A1 | EP680320A1 | JP8505640A | BR1100081A3 | US5686104A | SG45369A1 | EP680320B1 | DE69324504D1 | ES2133158T3 | US6126971A | MX192869B | JP03254219B2 | CA2150372C | MX227832B	Stable oral compositions for treating hypercholesterolaemia and hyperlipidaemia contain HMG CoA inhibitor which is acid-sensitive substd. pyran ring opened acid form of substd. pyrrolyl carboxamide stabilised with metal salt, esp. calcium carbonate	19940729MX9400281A_	2009-03-26 FPAY FEE PAYMENT + | 2005-03-29 FPAY FEE PAYMENT + | 2001-04-26 FPAY FEE PAYMENT + | 1998-01-20 CC CERTIFICATE OF CORRECTION		CC			14	23	US19935708F,1993-03-10
	CA2150372A1	STABLE ORAL CI-981 FORMULATION AND PROCESS OF PREPARING SAME | COMPOSITION ORALE STABLE DE CI-981 ET PROCEDE DE PREPARATION	An oral pharmaceutical composition is provided for treating hypercholesterolemia or hyperlipidemia containing an advantageous formulation for stabilizing the HMG-CoA coenzyme A inhibitor, CI-981 Hemi-Calcium, of formula (IA) with effective amounts of calcium carbonate. A method for preparing a CI-981 stabilizing composition is described.	1993-12-20	CA2150372A	US19935708A | WO1993US12471A	1993-01-19 | 1993-12-20	1994-08-04	WARNER LAMBERT CO	CA2150372A1 | AT178794T | CA2150372C | CY2128B1 | DE69324504D1 | DE69324504T2 | DK680320T3 | EP680320A1 | EP680320B1 | ES2133158T3 | GR3030359T3 | JP03254219B2 | JP8505640A | MX199400281A | SG45369A1 | US5686104A | US6126971A | WO1994016693A1			19940729MX9400281A_	2014-02-23 MKEX EXPIRY - 2013-12-20 | 1999-09-27 EEER EXAMINATION REQUEST +
	CA2150372C	STABLE ORAL CI-981 FORMULATION AND PROCESS OF PREPARING SAME | COMPOSITION ORALE STABLE DE CI-981 ET PROCEDE DE PREPARATION	An oral pharmaceutical composition is provided for treating hypercholesterolemia or hyperlipidemia containing an advantageousformulation for stabilizing the HMG-CoA coenzyme A inhibitor, CI-981 HemiCalcium, of formula (IA) with effective amounts of calciumcarbonate. A method for preparing a CI-981 stabilizing composition is described. An oral pharmaceutical composition is provided for treating hy…	1993-12-20	CA2150372A	US19935708A | WO1993US12471A	1993-01-19 | 1993-12-20	2002-08-20	WARNER-LAMBERT COMPANY,MORRIS PLAINS,US	CA2150372C | AT178794T | CA2150372A1 | CY2128B1 | DE69324504D1 | DE69324504T2 | DK680320T3 | EP680320A1 | EP680320B1 | ES2133158T3 | GR3030359T3 | JP03254219B2 | JP8505640A | MX199400281A | SG45369A1 | US5686104A | US6126971A | WO1994016693A1	WO1994016693A1 | EP680320A1 | JP8505640A | BR1100081A3 | US5686104A | SG45369A1 | EP680320B1 | DE69324504D1 | ES2133158T3 | US6126971A | MX192869B | JP03254219B2 | CA2150372C | MX227832B	Stable oral compositions for treating hypercholesterolaemia and hyperlipidaemia contain HMG CoA inhibitor which is acid-sensitive substd. pyran ring opened acid form of substd. pyrrolyl carboxamide stabilised with metal salt, esp. calcium carbonate	19940729MX9400281A_	2014-02-23 MKEX EXPIRY - 2013-12-20 | 1999-09-27 EEER EXAMINATION REQUEST +					14	23	, | CA2150372A,1993-12-20
	CA2097444A1	ANGIOTENSIN II ANTAGONIST IMIDAZOLE DERIVATIVES, THEIR PREPARATION AND THEIR THERAPEUTIC USE | DERIVES IMIDAZOLE ANTAGONISTES DE L'ANGIOTENSINE II, LEUR PREPARATION ET LEUR USAGE THERAPEUTIQUE	Compounds of formula (I): (I) ¢in which: R1 is hydrogen, alkyl, cycloalkyl or alkanoyl; R2 is a single bond, alkylene or alkylidene; R3 and R4 are each hydrogen or alkyl; R6 is carboxy or tetrazol-5-yl; and X is oxygen or sulfurl; and pharmaceutically acceptable salts and esters thereof are AII antagonists and can be used for the treatment and prophylaxis of hypertension and cardiovascular diseas…	1993-06-01	CA2097444A	JP1992141160A	1992-06-02	1993-12-03	YANAGISAWA HIROAKI | SHIMOJI YASUO | AMEMIYA YOSHIYA | KANAZAKI TAKURO | KOIKE HIROYUKI | SADA TOSHIO	CA2097444A1 | AT199548T | AT200777T | AT200778T | AU199211125A | AU199339880A | AU647887B | AU661153B | BR1100452A3 | CA2061607A1 | CA2061607C | CA2097444C | CA2229000A1 | CA2229000C | CN1045770C | CN1051766C | CN1065063A | CN1085896A | CN1101384C | CN1121859C | CN1188645A | CN1189490A | CZ199200516A3 | CZ199301050A3 | CZ287764B6 | CZ289194B6 | CZ289244B6 | DE10299043I1 | DE10299043I2 | DE1220050…	EP573218A2 | AU199339880A | CZ199301050A3 | HU64329T | NO199301980A | CA2097444A1 | FI199302492A | JP6049036A | ZA199303824A | TW228521B | EP573218A3 | NZ247750A | CN1085896A | AU661153B | US5616599A | US5646171A | IL105825A | RU2086541C1 | NO303872B1 | MX193466B | CZ287764B6 | EP573218B1 | DE69329982D1 | ES2155827T3 | KR300473B | JP03461863B2 | FI112476B1 | PH1199346284B1 | CN1051766C | CA209744…	New 1-(bi:phenyl-methyl)imidazole-5-carboxylic acid derivs. useful as angiotensin II antagonists in the treatment and prophylaxis of hyper-tension and cardiovascular diseases	19920220FI199200749A0	2006-06-01 MKLA LAPSED - | 2000-05-29 EEER EXAMINATION REQUEST +					30	34
	CA2097444C	ANGIOTENSIN II ANTAGONIST IMIDAZOLE DERIVATIVES, THEIR PREPARATION AND THEIR THERAPEUTIC USE | DERIVES IMIDAZOLE ANTAGONISTES DE L'ANGIOTENSINE II, LEUR PREPARATION ET LEUR USAGE THERAPEUTIQUE	Compounds of formula (I): (see formula I) [in which: R1 is hydrogen, alkyl, cycloalkyl or alkanoyl; R2 is a single bond, alkylene or alkylidene; R3 and R4 are each hydrogen or alkyl; R6 is carboxy or tetrazol-5-yl; and X is oxygen or sulfur]; and pharmaceutically acceptable salts and esters thereof are AII antagonists and can be used for the treatment and prophylaxis of hypertension and cardiovas…	1993-06-01	CA2097444A	JP1992141160A	1992-06-02	2005-03-29	SANKYO COMPANY LIMITED,TOKYO,JP	CA2097444C | AT199548T | AT200777T | AT200778T | AU199211125A | AU199339880A | AU647887B | AU661153B | BR1100452A3 | CA2061607A1 | CA2061607C | CA2097444A1 | CA2229000A1 | CA2229000C | CN1045770C | CN1051766C | CN1065063A | CN1085896A | CN1101384C | CN1121859C | CN1188645A | CN1189490A | CZ199200516A3 | CZ199301050A3 | CZ287764B6 | CZ289194B6 | CZ289244B6 | DE10299043I1 | DE10299043I2 | DE1220050…	EP573218A2 | AU199339880A | CZ199301050A3 | HU64329T | NO199301980A | CA2097444A1 | FI199302492A | JP6049036A | ZA199303824A | TW228521B | EP573218A3 | NZ247750A | CN1085896A | AU661153B | US5616599A | US5646171A | IL105825A | RU2086541C1 | NO303872B1 | MX193466B | CZ287764B6 | EP573218B1 | DE69329982D1 | ES2155827T3 | KR300473B | JP03461863B2 | FI112476B1 | PH1199346284B1 | CN1051766C | CA209744…	New 1-(bi:phenyl-methyl)imidazole-5-carboxylic acid derivs. useful as angiotensin II antagonists in the treatment and prophylaxis of hyper-tension and cardiovascular diseases	19920220FI199200749A0	2006-06-01 MKLA LAPSED - | 2000-05-29 EEER EXAMINATION REQUEST +					30	34	,
	US6162802A	Synergistic combination therapy using benazepril and amlodipine for the treatment of cardiovascular disorders and compositions therefor	A method for the treatment of a variety of cardiovascular disorders and related conditions in a mammal having at least one such disorder or condition is disclosed comprising treating the mammal with cotherapy comprising benazepril and amlodipine or pharmaceutically acceptable salts of either or both. Combination formulations of benazepril and amlodipine for use in the method are also disclosed.	1992-03-10	US1992848816A	US1992848816A	1992-03-10	2000-12-19	PAPA; JOSEPH | HENIS; MARC M J	US6162802A	US6162802A	Treatment of cardiovascular disorders by administration of benazepril and amlodipine	20001219US6162802A_	2012-05-23 FPAY FEE PAYMENT + | 2011-05-19 AS ASSIGNMENT NOVARTIS PHARMACEUTICALS CORPORATION, NEW JERSEY ASSIGNMENT OF ASSIGNORS INTEREST;ASSIGNOR:NOVARTIS CORPORATION;REEL/FRAME:026305/0297 2011-05-01 | 2008-06-06 FPAY FEE PAYMENT + | 2004-06-06 FPAY FEE PAYMENT + | 2001-11-20 CC CERTIFICATE OF CORRECTION | 2000-12-15 AS ASSIGNMENT NOVARTIS CORPORATION (PREV. CIBA-GEIGY CORP.), NEW ASSIGNMENT O…	NOVARTIS PHARMACEUTICALS CORPORATION,EAST HANOVER,NJ,US NOVARTIS PHARMACEUTICALS CORPORATION|ONE HEALTH PLAZA EAST HANOVER NEW JERSEY 07936 NOVARTIS PHARMACEUTICALS CORPORATION NOVARTIS CORPORATION 2011-05-01 2011 026305/0297 2011-05-19 2011 ASSIGNMENT OF ASSIGNORS INTEREST (SEE DOCUMENT FOR DETAILS). LINDA ADAMS NOVARTIS PHARMACEUTICALS CORP. ONE HEALTH PLAZA EAST HANOVER, NJ 07936 | NOVARTIS CO…	CC			1	1
	CA2061607A1	1-BIPHENYLIMIDAZOLE DERIVATIVES, THEIR PREPARATION AND THEIR THERAPEUTIC USE		1992-02-20	CA2061607A	JP199127098A | JP199196588A | JP1991134889A | JP1991167138A | JP1991173972A | JP1991184841A	1991-02-21 | 1991-04-26 | 1991-06-06 | 1991-07-08 | 1991-07-15 | 1991-07-24	1992-08-22	YANAGISAWA HIROAKI | SHIMOJI YASUO | FUJIMOTO KOICHI | KANAZAKI TAKURO | AMEMIYA YOSHIYA | KOIKE HIROYUKI | SADA TOSHIO	CA2061607A1 | AT199548T | AT200777T | AT200778T | AU199211125A | AU199339880A | AU647887B | AU661153B | BR1100452A3 | CA2061607C | CA2097444A1 | CA2097444C | CA2229000A1 | CA2229000C | CN1045770C | CN1051766C | CN1065063A | CN1085896A | CN1101384C | CN1121859C | CN1188645A | CN1189490A | CZ199200516A3 | CZ199301050A3 | CZ287764B6 | CZ289194B6 | CZ289244B6 | DE10299043I1 | DE10299043I2 | DE1220050…	EP503785A1 | AU199211125A | NO199200688A | CA2061607A1 | HU60475T | FI199200749A | ZA199201298A | JP5078328A | CN1065063A | CZ199200516A3 | NZ241681A | AU647887B | FI199505248A | JP7121918B2 | NO199504507A | IL101034A | IL114996A | BR1100452A3 | RU2092481C1 | NO304516B1 | NO304517B1 | CA2061607C | KR128289B1 | RU2128173C1 | EP503785B1 | DE69231798D1 | ES2157895T3 | CZ289194B6 | CZ289244B6 | CA222…	New 1-bi:phenyl-imidazole derivs. are angiotensin II receptor antagonists used for prevention and treatment of hypertension and heart and circulatory diseases	19920220FI199200749A0	2012-02-20 MKEX EXPIRY - | 1995-12-20 EEER EXAMINATION REQUEST +					43	31
	CA2061607C	1-BIPHENYLIMIDAZOLE DERIVATIVES, THEIR PREPARATION AND THEIR THERAPEUTIC USE | DERIVES 1-BIPHENYLIMIDAZOLE, LEUR PREPARATION ET LEUR UTILISATION THERAPEUTIQUE	Compounds of formula (I): (see fig. I) wherein R1 is alkyl or alkenyl; R2 and R3 are hydrogen, alkyl, alkenyl, cycloalkyl, aralkyl, aryl, or aryl fused to cycloalkyl; R4 is hydrogen, alkyl, alkanoyl, alkenoyl, arylcarbonyl, alkoxycarbonyl, totrahydropyranyl, tetrahydrothiopyranyl, tetrahydrothienyl tetrahydrofuryl, a group of formula -SiR a R b R c, in which R a, R b and R c are alkyl or aryl, al…	1992-02-20	CA2061607A	JP199127098A | JP199196588A | JP1991134889A | JP1991167138A | JP1991173972A | JP1991184841A	1991-02-21 | 1991-04-26 | 1991-06-06 | 1991-07-08 | 1991-07-15 | 1991-07-24	1999-01-19	DAIICHI SANKYO COMPANY LIMITED,TOKYO,JP	CA2061607C | AT199548T | AT200777T | AT200778T | AU199211125A | AU199339880A | AU647887B | AU661153B | BR1100452A3 | CA2061607A1 | CA2097444A1 | CA2097444C | CA2229000A1 | CA2229000C | CN1045770C | CN1051766C | CN1065063A | CN1085896A | CN1101384C | CN1121859C | CN1188645A | CN1189490A | CZ199200516A3 | CZ199301050A3 | CZ287764B6 | CZ289194B6 | CZ289244B6 | DE10299043I1 | DE10299043I2 | DE1220050…	EP503785A1 | AU199211125A | NO199200688A | CA2061607A1 | HU60475T | FI199200749A | ZA199201298A | JP5078328A | CN1065063A | CZ199200516A3 | NZ241681A | AU647887B | FI199505248A | JP7121918B2 | NO199504507A | IL101034A | IL114996A | BR1100452A3 | RU2092481C1 | NO304516B1 | NO304517B1 | CA2061607C | KR128289B1 | RU2128173C1 | EP503785B1 | DE69231798D1 | ES2157895T3 | CZ289194B6 | CZ289244B6 | CA222…	New 1-bi:phenyl-imidazole derivs. are angiotensin II receptor antagonists used for prevention and treatment of hypertension and heart and circulatory diseases	19920220FI199200749A0	2012-02-20 MKEX EXPIRY - | 1995-12-20 EEER EXAMINATION REQUEST +					43	31	,
	CA2229000A1	"1-BIPHENYLIMIDAZOLE DERIVATIVES, THEIR PREPARATION AND THEIR THERAPEUTIC USE" | DERIVES DE 1-BIPHENYLIMIDAZOLE, LEUR PREPARATION ET LEUR UTILISATION THERAPEUTIQUE	Compounds of formula (I): wherein, preferably, R1 represents an ethyl, propyl or butyl group; R2 represents a hydrogen atom or a methyl group; R3 represents a hydrogen atom; R4 represents a hydrogen atom or a methyl group; R5 represents a group of formula -COOR5a, in which R5a represents a hydrogen atom, a pivaloyloxymethyl group, an ethoxycarbonyloxymethyl group, a 1-(ethoxy-carbonyloxy)ethyl gr…	1992-02-20	CA2229000A	JP199127098A | JP199196588A | JP1991134889A | JP1991167138A | JP1991173972A | JP1991184841A | CA2061607A	1991-02-21 | 1991-04-26 | 1991-06-06 | 1991-07-08 | 1991-07-15 | 1991-07-24 | 1992-02-20	1992-08-22	SANKYO CO	CA2229000A1 | AT199548T | AT200777T | AT200778T | AU199211125A | AU199339880A | AU647887B | AU661153B | BR1100452A3 | CA2061607A1 | CA2061607C | CA2097444A1 | CA2097444C | CA2229000C | CN1045770C | CN1051766C | CN1065063A | CN1085896A | CN1101384C | CN1121859C | CN1188645A | CN1189490A | CZ199200516A3 | CZ199301050A3 | CZ287764B6 | CZ289194B6 | CZ289244B6 | DE10299043I1 | DE10299043I2 | DE1220050…			19920220FI199200749A0	2012-02-20 MKEX EXPIRY - | 1998-04-03 EEER EXAMINATION REQUEST +
	CA2229000C	1-BIPHENYLIMIDAZOLE DERIVATIVES, THEIR PREPARATION AND THEIRTHERAPEUTIC USE | DERIVES DE 1-BIPHENYLIMIDAZOLE, LEUR PREPARATION ET LEUR UTILISATION THERAPEUTIQUE	Compounds of formula (I):wherein, preferably, R1 represents an ethyl, propyl orbutyl group; R2 represents a hydrogen atom or a methylgroup; R3 represents a hydrogen atom; R4 represents ahydrogen atom or a methyl group; R5 represents a group offormula -COOR5a, in which R5a represents a hydrogen atom, apivaloyloxymethyl group, an ethoxycarbonyloxymethyl group,a 1-(ethoxy-carbonyloxy)ethyl group, an…	1992-02-20	CA2229000A	JP199127098A | JP199196588A | JP1991134889A | JP1991167138A | JP1991173972A | JP1991184841A | CA2061607A	1991-02-21 | 1991-04-26 | 1991-06-06 | 1991-07-08 | 1991-07-15 | 1991-07-24 | 1992-02-20	2002-04-09	DAIICHI SANKYO COMPANY LIMITED,TOKYO,JP	CA2229000C | AT199548T | AT200777T | AT200778T | AU199211125A | AU199339880A | AU647887B | AU661153B | BR1100452A3 | CA2061607A1 | CA2061607C | CA2097444A1 | CA2097444C | CA2229000A1 | CN1045770C | CN1051766C | CN1065063A | CN1085896A | CN1101384C | CN1121859C | CN1188645A | CN1189490A | CZ199200516A3 | CZ199301050A3 | CZ287764B6 | CZ289194B6 | CZ289244B6 | DE10299043I1 | DE10299043I2 | DE1220050…	EP503785A1 | AU199211125A | NO199200688A | CA2061607A1 | HU60475T | FI199200749A | ZA199201298A | JP5078328A | CN1065063A | CZ199200516A3 | NZ241681A | AU647887B | FI199505248A | JP7121918B2 | NO199504507A | IL101034A | IL114996A | BR1100452A3 | RU2092481C1 | NO304516B1 | NO304517B1 | CA2061607C | KR128289B1 | RU2128173C1 | EP503785B1 | DE69231798D1 | ES2157895T3 | CZ289194B6 | CZ289244B6 | CA222…	New 1-bi:phenyl-imidazole derivs. are angiotensin II receptor antagonists used for prevention and treatment of hypertension and heart and circulatory diseases	19920220FI199200749A0	2012-02-20 MKEX EXPIRY - | 1998-04-03 EEER EXAMINATION REQUEST +					43	31	, | CA2061607A,1992-02-20
	US4572909A	2-(Secondary aminoalkoxymethyl) dihydropyridine derivatives as anti-ischaemic and antihypertensive agents	A dihydropyridine compound of the formula ##STR1## or a pharmaceutically acceptable acid addition salt thereof, wherein<P> <P>Y is--(CH.sub.2).sub.2--,--(CH.sub.2).sub.3--,--CH.sub.2 CH(CH.sub.3)--or--CH.sub.2 C(CH.sub.3).sub.2--;<P><P>R is aryl or heteroaryl;<P><P>R.sup.1 and R.sup.2 are each independently C. sub.1-C.sub.4 alkyl or 2-methoxyethyl; and<P>< P>R.sup.3 is hydrogen, C.sub.1-C.sub.4 a…	1984-02-03	US1984576982A	GB19827180A	1982-03-11	1986-02-25	Pfizer Inc.,New York,NY,US	US4572909A | AT22884T | AU198312351A | AU540769B2 | BA1997147B1 | BA1998207B1 | BG60658B2 | CA1253865A1 | CS198301499A2 | CS198401592A2 | CS199104188A3 | CS240954B2 | CS240998B2 | DD209622A5 | DD218887A5 | DE19375111I2 | DE3366920D1 | DK161312B | DK161312C | DK198300813A | DK198300813D0 | EG16987A | EP89167A2 | EP89167A3 | EP89167B1 | ES198503654A1 | ES198505201A1 | ES520389D0 | ES526459D0 | FI19…	EP89167A1 | AU198312351A | JP58167569A | NO198300847A | FI198300789A | DK198300813A | HU27929T | ZA198301651A | PT76370A | DD209622A | DD218887A | CS198301499A | CS198401592A | ES198503654A | ES198505201A | US4572909A | EP89167B1 | DE3366920D1 | SU1227110A | SU1238730A | IL68091A | NO198604435A | JP62006703B | KR198700809B | CA1253865A1 | CS199104188A3	2-Aminoalkoxy-methyl 1,4-di:hydro:pyridine di:carboxylate derivs. with anti:ischaemic, antihypertensive and vasodilating agents	19830223DK198300813D0	2003-07-08 356 PATENT TERM EXTENSION UNDER 35 U.S.C. 156 + PRODUCT NAME: NORVASC 2003-02-25 2006-07-31 | 1997-06-02 FPAY FEE PAYMENT + | 1994-01-04 356 PATENT TERM EXTENSION UNDER 35 U.S.C. 156 + 1,252 DAYS | 1993-06-09 FPAY FEE PAYMENT + | 1989-06-14 FPAY FEE PAYMENT + | 1984-07-11 AS ASSIGNMENT PFIZER INC., 235 EAST 42ND ST., NEW YORK, NY A DE ASSIGNMENT OF ASSIGNORS INTEREST.;ASSIGNORS:CAMPBEL…	PFIZER INC.,NEW YORK,NY,US PFIZER INC.|235 EAST 42ND ST. A DE CORP. NEW YORK NEW YORK PFIZER INC. CAMPBELL, SIMON F. 1984-06-15 1984 CROSS, PETER E. 1984-06-15 1984 STUBBS, JOHN K. 1984-06-15 1984 004278/0630 1984-07-11 1984 ASSIGNMENT OF ASSIGNORS INTEREST. CHARLES J. KNUTH PFIZER INC. 235 EAST 42ND ST. NEW YORK, NY 10017	XT			26	27	US1983463081A,1983-02-02
	CA1253865A1	1,4-DIHYDRO HAVING A BASIC AMINO-CONTAINING GROUP ATTACHED TO THE 2-POSITION AS ANTI-ISCHAEMIC AND ANTIHYPERTENSIVE AGENTS | 1,4-DIHYDROPYRIDINES RENFERMANT UN GROUPE BASIQUE AMINE EN 2, AGENTS ANTI-ISCHEMIQUES ET ANTIHYPERTENSEURS	ABSTRACT OF THE DISCLOSURE Novel dihydropyridines of the formula:(I) and their pharmaceutically acceptable acid addition salts wherein Y is -(CH2)2-, -(CH2)3-, -CH2CH(CH3)- or -CH2C(CH3)2-; R is aryl or heteroaryl; R1 and R2 are each independently C1-C4 alkyl or 2-methoxyethyl; and R3 is hydrogen, C1-C4 alkyl, 2-(C1-C4 alkoxy)ethyl, cyclopropylmethyl, benzyl, or -(CH2)mCOR4 where m is 1, 2 or 3 a…	1983-03-09	CA423148A	GB19827180A	1982-03-11	1989-05-09	PFIZER CORPORATION	CA1253865A1 | AT22884T | AU198312351A | AU540769B2 | BA1997147B1 | BA1998207B1 | BG60658B2 | CS198301499A2 | CS198401592A2 | CS199104188A3 | CS240954B2 | CS240998B2 | DD209622A5 | DD218887A5 | DE19375111I2 | DE3366920D1 | DK161312B | DK161312C | DK198300813A | DK198300813D0 | EG16987A | EP89167A2 | EP89167A3 | EP89167B1 | ES198503654A1 | ES198505201A1 | ES520389D0 | ES526459D0 | FI198300789A | FI…	EP89167A1 | AU198312351A | JP58167569A | NO198300847A | FI198300789A | DK198300813A | HU27929T | ZA198301651A | PT76370A | DD209622A | DD218887A | CS198301499A | CS198401592A | ES198503654A | ES198505201A | US4572909A | EP89167B1 | DE3366920D1 | SU1227110A | SU1238730A | IL68091A | NO198604435A | JP62006703B | KR198700809B | CA1253865A1 | CS199104188A3	2-Aminoalkoxy-methyl 1,4-di:hydro:pyridine di:carboxylate derivs. with anti:ischaemic, antihypertensive and vasodilating agents	19830223DK198300813D0	2006-05-09 MKEX EXPIRY -					26	27

## Sheet: atenolol
BACK TO CONTENTS
INN:	atenolol
Category:	beta-blockers
1. Merck Index
Merck status:	Expired
Merck year:	1974
Merck data:	Prepn: Barrett et al., DE 2007751; eidem, US 3663607 and US 3836671 (1970, 1972, 1974 all to I.C.I.).
Merck patents:	DE2007751, US3663607, US3836671
2. Orange Book
Single formulations:	Drug	Dosage form/route	Strength(s)	Proprietary name	Brand supplier	# of generic suppliers	Patents	Data exclusivity	Drug approval date	Co-formulations available	Patented co-formulation	Notes
	atenolol	TABLET; ORAL	25MG, 50MG, or 100MG	TENORMIN	ALVOGEN IPCO SARL	12	None	None	Apr 9, 1990 for 25MG strength, others Approved Prior to Jan 1, 1982	ATENOLOL+CHLORTHALIDONE	No			1974
Single formulation patents:	None
Co formulations:	Drug	Dosage form/route	Strength(s)	Proprietary name	Brand supplier	# of generic suppliers	Patents	Data exclusivity	Drug approval date	Co-formulations available	Patented co-formulation	Notes
	None
OB co-forms w patents:	None
3. HC patent register
Single formulations:	INN	On patent register	Dosage form/route	Strength(s)	Proprietary name	Brand supplier	# of generic suppliers	patents
	atenolol	No					13
Single formulation patents:	None
Co formulations:	INN	On patent register	Dosage form/route	Strength(s)	Proprietary name	Brand supplier	# of generic suppliers	patents
	None
Co formulation patents:	None
4. Drug bank patents:	None
5. WO patents:	Patent number	Title	Date	Applicant	Inventor	Abstract	Inclusion/exclusion	Note	Typology	Typology description	APIs listed	Other APIs listed	API categories listed
[truncated: 19 more rows]

## Sheet: atorvastatin
BACK TO CONTENTS
INN:	atorvastatin
Category:	statin
1. Merck Index
Merck status:	Potentially active
Merck year:	1993
Merck data:	Prepn: B. D. Roth, EP 409281; idem, US 5273995 (1991, 1993 both to Warner-Lambert)
Merck patents:	EP409281, US5273995
2. Orange Book
[truncated: 166 more rows]

[truncated: 42 more sheets: benazepril, bisoprolol, bumetanide, candesartan, carvedilol, chlorothiazide, chlorthalidone, clopidogrel, enalapril, eplerenone, eprosartan, felodipine, fluvastatin, fosinopril, furosemide, hydrochlorothiazide, indapamide, irbesartan, lisinopril, losartan …]
